# Supplementary material for: Unique viruses that infect Archaea related to eukaryotes
Source: bioRxiv preprint, doi:10.1101/2021.07.29.454249, version 1 (2021-07-29)
Supplement: Supplementary Data 5 [file 454249_file05.xlsx]

## Sheet: DIAMOND VIBRANT-HMM InterProSca
Proposed_Name	Gene_ID	Gene_Coordinates	strand	hosts	cycle	vibrant_accession	vibrant_title	query_length	interproscan_analysis_database	interproscan_signature_accession	interproscan_signature_description	interproscan_start	interproscan_stop	interproscan_evalue	interproscan_match_status	interproscan_annotation	interproscan_description	BLASTP_Subject_ID	BLASTP_Percent_ID	BLASTP_Alignment_Length	BLASTP_Mismatches	BLASTP_Gap_Openings	BLASTP_Start_Query	BLASTP_End_Query	BLASTP_Start_Subject	BLASTP_End_Subject	BLASTP_E_Value	BLASTP_Bitscore	BLASTP_Query_Length	BLASTP_Subject_Length	BLASTP_Subject_Phylums	BLASTP_Subject_Sciname	BLASTP_Subject_Taxid	BLASTP_Subject_Title
Vedfolnir	Guay1_scaffold_2kb_Guay1_scaffold00443_1	(206..1981)	1	Thorarchaeota B59_G1 (CRISPR), Chloroflexi B30_G2, B4_G1	Lysogenic	VOG00935	sp|P20703|UVSW_BPT4 ATP-dependent DNA helicase uvsW	591	SUPERFAMILY	SSF52540	NA	20	225	9.61E-28	TRUE	IPR027417	P-loop containing nucleoside triphosphate hydrolase	WP_167106941.1	42	572	299	13	35	584	27	587	1.90E-109	407.1	592	587	Actinobacteria	Amycolatopsis granulosa	185684	WP_167106941.1 DEAD/DEAH box helicase family protein [Amycolatopsis granulosa]
Vedfolnir	Guay1_scaffold_2kb_Guay1_scaffold00443_1	(206..1981)	1	Thorarchaeota B59_G1 (CRISPR), Chloroflexi B30_G2, B4_G2	Lysogenic	VOG00935	sp|P20703|UVSW_BPT4 ATP-dependent DNA helicase uvsW	591	SUPERFAMILY	SSF52540	NA	20	225	9.61E-28	TRUE	IPR027417	P-loop containing nucleoside triphosphate hydrolase	OIP64149.1	51	400	188	5	29	424	4	399	1.90E-109	407.1	592	536	Ignavibacteriae	Ignavibacteria bacterium CG2_30_36_16	1805221	OIP64149.1 hypothetical protein AUK34_00305 [Ignavibacteria bacterium CG2_30_36_16]
Vedfolnir	Guay1_scaffold_2kb_Guay1_scaffold00443_1	(206..1981)	1	Thorarchaeota B59_G1 (CRISPR), Chloroflexi B30_G2, B4_G3	Lysogenic	VOG00935	sp|P20703|UVSW_BPT4 ATP-dependent DNA helicase uvsW	591	SUPERFAMILY	SSF52540	NA	20	225	9.61E-28	TRUE	IPR027417	P-loop containing nucleoside triphosphate hydrolase	WP_167112877.1	41.4	568	308	11	35	584	27	587	1.40E-109	407.5	592	587	Actinobacteria	Amycolatopsis viridis	185678	WP_167112877.1 DEAD/DEAH box helicase family protein [Amycolatopsis viridis]
Vedfolnir	Guay1_scaffold_2kb_Guay1_scaffold00443_1	(206..1981)	1	Thorarchaeota B59_G1 (CRISPR), Chloroflexi B30_G2, B4_G4	Lysogenic	VOG00935	sp|P20703|UVSW_BPT4 ATP-dependent DNA helicase uvsW	591	SUPERFAMILY	SSF52540	NA	20	225	9.61E-28	TRUE	IPR027417	P-loop containing nucleoside triphosphate hydrolase	WP_094009023.1	41.5	568	307	11	35	584	27	587	1.10E-109	407.9	592	587	Actinobacteria	Amycolatopsis;Amycolatopsis sp. KNN50.9b	1813;2018303	WP_094009023.1 MULTISPECIES: DEAD/DEAH box helicase [Amycolatopsis]
Vedfolnir	Guay1_scaffold_2kb_Guay1_scaffold00443_1	(206..1981)	1	Thorarchaeota B59_G1 (CRISPR), Chloroflexi B30_G2, B4_G5	Lysogenic	VOG00935	sp|P20703|UVSW_BPT4 ATP-dependent DNA helicase uvsW	591	SUPERFAMILY	SSF52540	NA	20	225	9.61E-28	TRUE	IPR027417	P-loop containing nucleoside triphosphate hydrolase	WP_034317045.1	41	576	298	12	35	584	25	584	8.40E-110	408.3	592	584	Actinobacteria	Actinobacteria;Amycolatopsis lurida;Amycolatopsis lurida NRRL 2430;Streptomyces sp. WAC 05977	1760;31959;1460371;2203208	WP_034317045.1 MULTISPECIES: DEAD/DEAH box helicase [Actinobacteria]
Vedfolnir	Guay1_scaffold_2kb_Guay1_scaffold00443_1	(206..1981)	1	Thorarchaeota B59_G1 (CRISPR), Chloroflexi B30_G2, B4_G6	Lysogenic	VOG00935	sp|P20703|UVSW_BPT4 ATP-dependent DNA helicase uvsW	591	SUPERFAMILY	SSF52540	NA	20	225	9.61E-28	TRUE	IPR027417	P-loop containing nucleoside triphosphate hydrolase	GHF17970.1	41.5	568	307	11	35	584	27	587	6.40E-110	408.7	592	587	N/A	N/A		GHF17970.1 hypothetical protein GCM10017786_59630 [Amycolatopsis deserti]
Vedfolnir	Guay1_scaffold_2kb_Guay1_scaffold00443_1	(206..1981)	1	Thorarchaeota B59_G1 (CRISPR), Chloroflexi B30_G2, B4_G7	Lysogenic	VOG00935	sp|P20703|UVSW_BPT4 ATP-dependent DNA helicase uvsW	591	SUPERFAMILY	SSF52540	NA	20	225	9.61E-28	TRUE	IPR027417	P-loop containing nucleoside triphosphate hydrolase	WP_017983720.1	41.7	568	306	11	35	584	27	587	3.80E-110	409.5	592	587	Actinobacteria	Amycolatopsis;Amycolatopsis eurytherma;Amycolatopsis methanolica 239	1813;196083;1068978	WP_017983720.1 MULTISPECIES: DEAD/DEAH box helicase [Amycolatopsis]
Vedfolnir	Guay1_scaffold_2kb_Guay1_scaffold00443_1	(206..1981)	1	Thorarchaeota B59_G1 (CRISPR), Chloroflexi B30_G2, B4_G8	Lysogenic	VOG00935	sp|P20703|UVSW_BPT4 ATP-dependent DNA helicase uvsW	591	SUPERFAMILY	SSF52540	NA	20	225	9.61E-28	TRUE	IPR027417	P-loop containing nucleoside triphosphate hydrolase	WP_027947051.1	41.9	568	305	11	35	584	24	584	9.00E-112	414.8	592	584	Actinobacteria	Amycolatopsis taiwanensis	342230	WP_027947051.1 DEAD/DEAH box helicase [Amycolatopsis taiwanensis]
Vedfolnir	Guay1_scaffold_2kb_Guay1_scaffold00443_1	(206..1981)	1	Thorarchaeota B59_G1 (CRISPR), Chloroflexi B30_G2, B4_G9	Lysogenic	VOG00935	sp|P20703|UVSW_BPT4 ATP-dependent DNA helicase uvsW	591	SUPERFAMILY	SSF52540	NA	20	225	9.61E-28	TRUE	IPR027417	P-loop containing nucleoside triphosphate hydrolase	NLT49910.1	52.6	397	181	4	29	421	4	397	4.80E-113	419.1	592	541	N/A	N/A		NLT49910.1 DEAD/DEAH box helicase [Ignavibacteria bacterium]
Vedfolnir	Guay1_scaffold_2kb_Guay1_scaffold00443_1	(206..1981)	1	Thorarchaeota B59_G1 (CRISPR), Chloroflexi B30_G2, B4_G10	Lysogenic	VOG00935	sp|P20703|UVSW_BPT4 ATP-dependent DNA helicase uvsW	591	SUPERFAMILY	SSF52540	NA	20	225	9.61E-28	TRUE	IPR027417	P-loop containing nucleoside triphosphate hydrolase	RLC82108.1	100	591	0	0	1	591	1	591	0	1170.6	592	591	Chloroflexi	Chloroflexi bacterium	2026724	RLC82108.1 ATP-dependent helicase [Chloroflexi bacterium]
Vedfolnir	Guay1_scaffold_2kb_Guay1_scaffold00443_1	(206..1981)	1	Thorarchaeota B59_G1 (CRISPR), Chloroflexi B30_G2, B4_G11	Lysogenic	VOG00935	sp|P20703|UVSW_BPT4 ATP-dependent DNA helicase uvsW	591	Gene3D	G3DSA:3.40.50.300	P-loop containing nucleotide triphosphate hydrolases	29	197	3.90E-24	TRUE			WP_167106941.1	42	572	299	13	35	584	27	587	1.90E-109	407.1	592	587	Actinobacteria	Amycolatopsis granulosa	185684	WP_167106941.1 DEAD/DEAH box helicase family protein [Amycolatopsis granulosa]
Vedfolnir	Guay1_scaffold_2kb_Guay1_scaffold00443_1	(206..1981)	1	Thorarchaeota B59_G1 (CRISPR), Chloroflexi B30_G2, B4_G12	Lysogenic	VOG00935	sp|P20703|UVSW_BPT4 ATP-dependent DNA helicase uvsW	591	Gene3D	G3DSA:3.40.50.300	P-loop containing nucleotide triphosphate hydrolases	29	197	3.90E-24	TRUE			OIP64149.1	51	400	188	5	29	424	4	399	1.90E-109	407.1	592	536	Ignavibacteriae	Ignavibacteria bacterium CG2_30_36_16	1805221	OIP64149.1 hypothetical protein AUK34_00305 [Ignavibacteria bacterium CG2_30_36_16]
Vedfolnir	Guay1_scaffold_2kb_Guay1_scaffold00443_1	(206..1981)	1	Thorarchaeota B59_G1 (CRISPR), Chloroflexi B30_G2, B4_G13	Lysogenic	VOG00935	sp|P20703|UVSW_BPT4 ATP-dependent DNA helicase uvsW	591	Gene3D	G3DSA:3.40.50.300	P-loop containing nucleotide triphosphate hydrolases	29	197	3.90E-24	TRUE			WP_167112877.1	41.4	568	308	11	35	584	27	587	1.40E-109	407.5	592	587	Actinobacteria	Amycolatopsis viridis	185678	WP_167112877.1 DEAD/DEAH box helicase family protein [Amycolatopsis viridis]
Vedfolnir	Guay1_scaffold_2kb_Guay1_scaffold00443_1	(206..1981)	1	Thorarchaeota B59_G1 (CRISPR), Chloroflexi B30_G2, B4_G14	Lysogenic	VOG00935	sp|P20703|UVSW_BPT4 ATP-dependent DNA helicase uvsW	591	Gene3D	G3DSA:3.40.50.300	P-loop containing nucleotide triphosphate hydrolases	29	197	3.90E-24	TRUE			WP_094009023.1	41.5	568	307	11	35	584	27	587	1.10E-109	407.9	592	587	Actinobacteria	Amycolatopsis;Amycolatopsis sp. KNN50.9b	1813;2018303	WP_094009023.1 MULTISPECIES: DEAD/DEAH box helicase [Amycolatopsis]
Vedfolnir	Guay1_scaffold_2kb_Guay1_scaffold00443_1	(206..1981)	1	Thorarchaeota B59_G1 (CRISPR), Chloroflexi B30_G2, B4_G15	Lysogenic	VOG00935	sp|P20703|UVSW_BPT4 ATP-dependent DNA helicase uvsW	591	Gene3D	G3DSA:3.40.50.300	P-loop containing nucleotide triphosphate hydrolases	29	197	3.90E-24	TRUE			WP_034317045.1	41	576	298	12	35	584	25	584	8.40E-110	408.3	592	584	Actinobacteria	Actinobacteria;Amycolatopsis lurida;Amycolatopsis lurida NRRL 2430;Streptomyces sp. WAC 05977	1760;31959;1460371;2203208	WP_034317045.1 MULTISPECIES: DEAD/DEAH box helicase [Actinobacteria]
Vedfolnir	Guay1_scaffold_2kb_Guay1_scaffold00443_1	(206..1981)	1	Thorarchaeota B59_G1 (CRISPR), Chloroflexi B30_G2, B4_G16	Lysogenic	VOG00935	sp|P20703|UVSW_BPT4 ATP-dependent DNA helicase uvsW	591	Gene3D	G3DSA:3.40.50.300	P-loop containing nucleotide triphosphate hydrolases	29	197	3.90E-24	TRUE			GHF17970.1	41.5	568	307	11	35	584	27	587	6.40E-110	408.7	592	587	N/A	N/A		GHF17970.1 hypothetical protein GCM10017786_59630 [Amycolatopsis deserti]
Vedfolnir	Guay1_scaffold_2kb_Guay1_scaffold00443_1	(206..1981)	1	Thorarchaeota B59_G1 (CRISPR), Chloroflexi B30_G2, B4_G17	Lysogenic	VOG00935	sp|P20703|UVSW_BPT4 ATP-dependent DNA helicase uvsW	591	Gene3D	G3DSA:3.40.50.300	P-loop containing nucleotide triphosphate hydrolases	29	197	3.90E-24	TRUE			WP_017983720.1	41.7	568	306	11	35	584	27	587	3.80E-110	409.5	592	587	Actinobacteria	Amycolatopsis;Amycolatopsis eurytherma;Amycolatopsis methanolica 239	1813;196083;1068978	WP_017983720.1 MULTISPECIES: DEAD/DEAH box helicase [Amycolatopsis]
Vedfolnir	Guay1_scaffold_2kb_Guay1_scaffold00443_1	(206..1981)	1	Thorarchaeota B59_G1 (CRISPR), Chloroflexi B30_G2, B4_G18	Lysogenic	VOG00935	sp|P20703|UVSW_BPT4 ATP-dependent DNA helicase uvsW	591	Gene3D	G3DSA:3.40.50.300	P-loop containing nucleotide triphosphate hydrolases	29	197	3.90E-24	TRUE			WP_027947051.1	41.9	568	305	11	35	584	24	584	9.00E-112	414.8	592	584	Actinobacteria	Amycolatopsis taiwanensis	342230	WP_027947051.1 DEAD/DEAH box helicase [Amycolatopsis taiwanensis]
Vedfolnir	Guay1_scaffold_2kb_Guay1_scaffold00443_1	(206..1981)	1	Thorarchaeota B59_G1 (CRISPR), Chloroflexi B30_G2, B4_G19	Lysogenic	VOG00935	sp|P20703|UVSW_BPT4 ATP-dependent DNA helicase uvsW	591	Gene3D	G3DSA:3.40.50.300	P-loop containing nucleotide triphosphate hydrolases	29	197	3.90E-24	TRUE			NLT49910.1	52.6	397	181	4	29	421	4	397	4.80E-113	419.1	592	541	N/A	N/A		NLT49910.1 DEAD/DEAH box helicase [Ignavibacteria bacterium]
Vedfolnir	Guay1_scaffold_2kb_Guay1_scaffold00443_1	(206..1981)	1	Thorarchaeota B59_G1 (CRISPR), Chloroflexi B30_G2, B4_G20	Lysogenic	VOG00935	sp|P20703|UVSW_BPT4 ATP-dependent DNA helicase uvsW	591	Gene3D	G3DSA:3.40.50.300	P-loop containing nucleotide triphosphate hydrolases	29	197	3.90E-24	TRUE			RLC82108.1	100	591	0	0	1	591	1	591	0	1170.6	592	591	Chloroflexi	Chloroflexi bacterium	2026724	RLC82108.1 ATP-dependent helicase [Chloroflexi bacterium]
Vedfolnir	Guay1_scaffold_2kb_Guay1_scaffold00443_1	(206..1981)	1	Thorarchaeota B59_G1 (CRISPR), Chloroflexi B30_G2, B4_G21	Lysogenic	VOG00935	sp|P20703|UVSW_BPT4 ATP-dependent DNA helicase uvsW	591	SMART	SM00487	DEAD-like helicases superfamily	32	213	6.40E-13	TRUE	IPR014001	Helicase superfamily 1/2, ATP-binding domain	WP_167106941.1	42	572	299	13	35	584	27	587	1.90E-109	407.1	592	587	Actinobacteria	Amycolatopsis granulosa	185684	WP_167106941.1 DEAD/DEAH box helicase family protein [Amycolatopsis granulosa]
Vedfolnir	Guay1_scaffold_2kb_Guay1_scaffold00443_1	(206..1981)	1	Thorarchaeota B59_G1 (CRISPR), Chloroflexi B30_G2, B4_G22	Lysogenic	VOG00935	sp|P20703|UVSW_BPT4 ATP-dependent DNA helicase uvsW	591	SMART	SM00487	DEAD-like helicases superfamily	32	213	6.40E-13	TRUE	IPR014001	Helicase superfamily 1/2, ATP-binding domain	OIP64149.1	51	400	188	5	29	424	4	399	1.90E-109	407.1	592	536	Ignavibacteriae	Ignavibacteria bacterium CG2_30_36_16	1805221	OIP64149.1 hypothetical protein AUK34_00305 [Ignavibacteria bacterium CG2_30_36_16]
Vedfolnir	Guay1_scaffold_2kb_Guay1_scaffold00443_1	(206..1981)	1	Thorarchaeota B59_G1 (CRISPR), Chloroflexi B30_G2, B4_G23	Lysogenic	VOG00935	sp|P20703|UVSW_BPT4 ATP-dependent DNA helicase uvsW	591	SMART	SM00487	DEAD-like helicases superfamily	32	213	6.40E-13	TRUE	IPR014001	Helicase superfamily 1/2, ATP-binding domain	WP_167112877.1	41.4	568	308	11	35	584	27	587	1.40E-109	407.5	592	587	Actinobacteria	Amycolatopsis viridis	185678	WP_167112877.1 DEAD/DEAH box helicase family protein [Amycolatopsis viridis]
Vedfolnir	Guay1_scaffold_2kb_Guay1_scaffold00443_1	(206..1981)	1	Thorarchaeota B59_G1 (CRISPR), Chloroflexi B30_G2, B4_G24	Lysogenic	VOG00935	sp|P20703|UVSW_BPT4 ATP-dependent DNA helicase uvsW	591	SMART	SM00487	DEAD-like helicases superfamily	32	213	6.40E-13	TRUE	IPR014001	Helicase superfamily 1/2, ATP-binding domain	WP_094009023.1	41.5	568	307	11	35	584	27	587	1.10E-109	407.9	592	587	Actinobacteria	Amycolatopsis;Amycolatopsis sp. KNN50.9b	1813;2018303	WP_094009023.1 MULTISPECIES: DEAD/DEAH box helicase [Amycolatopsis]
Vedfolnir	Guay1_scaffold_2kb_Guay1_scaffold00443_1	(206..1981)	1	Thorarchaeota B59_G1 (CRISPR), Chloroflexi B30_G2, B4_G25	Lysogenic	VOG00935	sp|P20703|UVSW_BPT4 ATP-dependent DNA helicase uvsW	591	SMART	SM00487	DEAD-like helicases superfamily	32	213	6.40E-13	TRUE	IPR014001	Helicase superfamily 1/2, ATP-binding domain	WP_034317045.1	41	576	298	12	35	584	25	584	8.40E-110	408.3	592	584	Actinobacteria	Actinobacteria;Amycolatopsis lurida;Amycolatopsis lurida NRRL 2430;Streptomyces sp. WAC 05977	1760;31959;1460371;2203208	WP_034317045.1 MULTISPECIES: DEAD/DEAH box helicase [Actinobacteria]
Vedfolnir	Guay1_scaffold_2kb_Guay1_scaffold00443_1	(206..1981)	1	Thorarchaeota B59_G1 (CRISPR), Chloroflexi B30_G2, B4_G26	Lysogenic	VOG00935	sp|P20703|UVSW_BPT4 ATP-dependent DNA helicase uvsW	591	SMART	SM00487	DEAD-like helicases superfamily	32	213	6.40E-13	TRUE	IPR014001	Helicase superfamily 1/2, ATP-binding domain	GHF17970.1	41.5	568	307	11	35	584	27	587	6.40E-110	408.7	592	587	N/A	N/A		GHF17970.1 hypothetical protein GCM10017786_59630 [Amycolatopsis deserti]
Vedfolnir	Guay1_scaffold_2kb_Guay1_scaffold00443_1	(206..1981)	1	Thorarchaeota B59_G1 (CRISPR), Chloroflexi B30_G2, B4_G27	Lysogenic	VOG00935	sp|P20703|UVSW_BPT4 ATP-dependent DNA helicase uvsW	591	SMART	SM00487	DEAD-like helicases superfamily	32	213	6.40E-13	TRUE	IPR014001	Helicase superfamily 1/2, ATP-binding domain	WP_017983720.1	41.7	568	306	11	35	584	27	587	3.80E-110	409.5	592	587	Actinobacteria	Amycolatopsis;Amycolatopsis eurytherma;Amycolatopsis methanolica 239	1813;196083;1068978	WP_017983720.1 MULTISPECIES: DEAD/DEAH box helicase [Amycolatopsis]
Vedfolnir	Guay1_scaffold_2kb_Guay1_scaffold00443_1	(206..1981)	1	Thorarchaeota B59_G1 (CRISPR), Chloroflexi B30_G2, B4_G28	Lysogenic	VOG00935	sp|P20703|UVSW_BPT4 ATP-dependent DNA helicase uvsW	591	SMART	SM00487	DEAD-like helicases superfamily	32	213	6.40E-13	TRUE	IPR014001	Helicase superfamily 1/2, ATP-binding domain	WP_027947051.1	41.9	568	305	11	35	584	24	584	9.00E-112	414.8	592	584	Actinobacteria	Amycolatopsis taiwanensis	342230	WP_027947051.1 DEAD/DEAH box helicase [Amycolatopsis taiwanensis]
Vedfolnir	Guay1_scaffold_2kb_Guay1_scaffold00443_1	(206..1981)	1	Thorarchaeota B59_G1 (CRISPR), Chloroflexi B30_G2, B4_G29	Lysogenic	VOG00935	sp|P20703|UVSW_BPT4 ATP-dependent DNA helicase uvsW	591	SMART	SM00487	DEAD-like helicases superfamily	32	213	6.40E-13	TRUE	IPR014001	Helicase superfamily 1/2, ATP-binding domain	NLT49910.1	52.6	397	181	4	29	421	4	397	4.80E-113	419.1	592	541	N/A	N/A		NLT49910.1 DEAD/DEAH box helicase [Ignavibacteria bacterium]
Vedfolnir	Guay1_scaffold_2kb_Guay1_scaffold00443_1	(206..1981)	1	Thorarchaeota B59_G1 (CRISPR), Chloroflexi B30_G2, B4_G30	Lysogenic	VOG00935	sp|P20703|UVSW_BPT4 ATP-dependent DNA helicase uvsW	591	SMART	SM00487	DEAD-like helicases superfamily	32	213	6.40E-13	TRUE	IPR014001	Helicase superfamily 1/2, ATP-binding domain	RLC82108.1	100	591	0	0	1	591	1	591	0	1170.6	592	591	Chloroflexi	Chloroflexi bacterium	2026724	RLC82108.1 ATP-dependent helicase [Chloroflexi bacterium]
Vedfolnir	Guay1_scaffold_2kb_Guay1_scaffold00443_1	(206..1981)	1	Thorarchaeota B59_G1 (CRISPR), Chloroflexi B30_G2, B4_G31	Lysogenic	VOG00935	sp|P20703|UVSW_BPT4 ATP-dependent DNA helicase uvsW	591	Pfam	PF04851	Type III restriction enzyme, res subunit	34	188	2.20E-17	TRUE	IPR006935	Helicase/UvrB, N-terminal	WP_167106941.1	42	572	299	13	35	584	27	587	1.90E-109	407.1	592	587	Actinobacteria	Amycolatopsis granulosa	185684	WP_167106941.1 DEAD/DEAH box helicase family protein [Amycolatopsis granulosa]
Vedfolnir	Guay1_scaffold_2kb_Guay1_scaffold00443_1	(206..1981)	1	Thorarchaeota B59_G1 (CRISPR), Chloroflexi B30_G2, B4_G32	Lysogenic	VOG00935	sp|P20703|UVSW_BPT4 ATP-dependent DNA helicase uvsW	591	Pfam	PF04851	Type III restriction enzyme, res subunit	34	188	2.20E-17	TRUE	IPR006935	Helicase/UvrB, N-terminal	OIP64149.1	51	400	188	5	29	424	4	399	1.90E-109	407.1	592	536	Ignavibacteriae	Ignavibacteria bacterium CG2_30_36_16	1805221	OIP64149.1 hypothetical protein AUK34_00305 [Ignavibacteria bacterium CG2_30_36_16]
Vedfolnir	Guay1_scaffold_2kb_Guay1_scaffold00443_1	(206..1981)	1	Thorarchaeota B59_G1 (CRISPR), Chloroflexi B30_G2, B4_G33	Lysogenic	VOG00935	sp|P20703|UVSW_BPT4 ATP-dependent DNA helicase uvsW	591	Pfam	PF04851	Type III restriction enzyme, res subunit	34	188	2.20E-17	TRUE	IPR006935	Helicase/UvrB, N-terminal	WP_167112877.1	41.4	568	308	11	35	584	27	587	1.40E-109	407.5	592	587	Actinobacteria	Amycolatopsis viridis	185678	WP_167112877.1 DEAD/DEAH box helicase family protein [Amycolatopsis viridis]
Vedfolnir	Guay1_scaffold_2kb_Guay1_scaffold00443_1	(206..1981)	1	Thorarchaeota B59_G1 (CRISPR), Chloroflexi B30_G2, B4_G34	Lysogenic	VOG00935	sp|P20703|UVSW_BPT4 ATP-dependent DNA helicase uvsW	591	Pfam	PF04851	Type III restriction enzyme, res subunit	34	188	2.20E-17	TRUE	IPR006935	Helicase/UvrB, N-terminal	WP_094009023.1	41.5	568	307	11	35	584	27	587	1.10E-109	407.9	592	587	Actinobacteria	Amycolatopsis;Amycolatopsis sp. KNN50.9b	1813;2018303	WP_094009023.1 MULTISPECIES: DEAD/DEAH box helicase [Amycolatopsis]
Vedfolnir	Guay1_scaffold_2kb_Guay1_scaffold00443_1	(206..1981)	1	Thorarchaeota B59_G1 (CRISPR), Chloroflexi B30_G2, B4_G35	Lysogenic	VOG00935	sp|P20703|UVSW_BPT4 ATP-dependent DNA helicase uvsW	591	Pfam	PF04851	Type III restriction enzyme, res subunit	34	188	2.20E-17	TRUE	IPR006935	Helicase/UvrB, N-terminal	WP_034317045.1	41	576	298	12	35	584	25	584	8.40E-110	408.3	592	584	Actinobacteria	Actinobacteria;Amycolatopsis lurida;Amycolatopsis lurida NRRL 2430;Streptomyces sp. WAC 05977	1760;31959;1460371;2203208	WP_034317045.1 MULTISPECIES: DEAD/DEAH box helicase [Actinobacteria]
Vedfolnir	Guay1_scaffold_2kb_Guay1_scaffold00443_1	(206..1981)	1	Thorarchaeota B59_G1 (CRISPR), Chloroflexi B30_G2, B4_G36	Lysogenic	VOG00935	sp|P20703|UVSW_BPT4 ATP-dependent DNA helicase uvsW	591	Pfam	PF04851	Type III restriction enzyme, res subunit	34	188	2.20E-17	TRUE	IPR006935	Helicase/UvrB, N-terminal	GHF17970.1	41.5	568	307	11	35	584	27	587	6.40E-110	408.7	592	587	N/A	N/A		GHF17970.1 hypothetical protein GCM10017786_59630 [Amycolatopsis deserti]
Vedfolnir	Guay1_scaffold_2kb_Guay1_scaffold00443_1	(206..1981)	1	Thorarchaeota B59_G1 (CRISPR), Chloroflexi B30_G2, B4_G37	Lysogenic	VOG00935	sp|P20703|UVSW_BPT4 ATP-dependent DNA helicase uvsW	591	Pfam	PF04851	Type III restriction enzyme, res subunit	34	188	2.20E-17	TRUE	IPR006935	Helicase/UvrB, N-terminal	WP_017983720.1	41.7	568	306	11	35	584	27	587	3.80E-110	409.5	592	587	Actinobacteria	Amycolatopsis;Amycolatopsis eurytherma;Amycolatopsis methanolica 239	1813;196083;1068978	WP_017983720.1 MULTISPECIES: DEAD/DEAH box helicase [Amycolatopsis]
Vedfolnir	Guay1_scaffold_2kb_Guay1_scaffold00443_1	(206..1981)	1	Thorarchaeota B59_G1 (CRISPR), Chloroflexi B30_G2, B4_G38	Lysogenic	VOG00935	sp|P20703|UVSW_BPT4 ATP-dependent DNA helicase uvsW	591	Pfam	PF04851	Type III restriction enzyme, res subunit	34	188	2.20E-17	TRUE	IPR006935	Helicase/UvrB, N-terminal	WP_027947051.1	41.9	568	305	11	35	584	24	584	9.00E-112	414.8	592	584	Actinobacteria	Amycolatopsis taiwanensis	342230	WP_027947051.1 DEAD/DEAH box helicase [Amycolatopsis taiwanensis]
Vedfolnir	Guay1_scaffold_2kb_Guay1_scaffold00443_1	(206..1981)	1	Thorarchaeota B59_G1 (CRISPR), Chloroflexi B30_G2, B4_G39	Lysogenic	VOG00935	sp|P20703|UVSW_BPT4 ATP-dependent DNA helicase uvsW	591	Pfam	PF04851	Type III restriction enzyme, res subunit	34	188	2.20E-17	TRUE	IPR006935	Helicase/UvrB, N-terminal	NLT49910.1	52.6	397	181	4	29	421	4	397	4.80E-113	419.1	592	541	N/A	N/A		NLT49910.1 DEAD/DEAH box helicase [Ignavibacteria bacterium]
Vedfolnir	Guay1_scaffold_2kb_Guay1_scaffold00443_1	(206..1981)	1	Thorarchaeota B59_G1 (CRISPR), Chloroflexi B30_G2, B4_G40	Lysogenic	VOG00935	sp|P20703|UVSW_BPT4 ATP-dependent DNA helicase uvsW	591	Pfam	PF04851	Type III restriction enzyme, res subunit	34	188	2.20E-17	TRUE	IPR006935	Helicase/UvrB, N-terminal	RLC82108.1	100	591	0	0	1	591	1	591	0	1170.6	592	591	Chloroflexi	Chloroflexi bacterium	2026724	RLC82108.1 ATP-dependent helicase [Chloroflexi bacterium]
Vedfolnir	Guay1_scaffold_2kb_Guay1_scaffold00443_1	(206..1981)	1	Thorarchaeota B59_G1 (CRISPR), Chloroflexi B30_G2, B4_G41	Lysogenic	VOG00935	sp|P20703|UVSW_BPT4 ATP-dependent DNA helicase uvsW	591	CDD	cd00046	DEXDc	52	187	2.33E-06	TRUE			WP_167106941.1	42	572	299	13	35	584	27	587	1.90E-109	407.1	592	587	Actinobacteria	Amycolatopsis granulosa	185684	WP_167106941.1 DEAD/DEAH box helicase family protein [Amycolatopsis granulosa]
Vedfolnir	Guay1_scaffold_2kb_Guay1_scaffold00443_1	(206..1981)	1	Thorarchaeota B59_G1 (CRISPR), Chloroflexi B30_G2, B4_G42	Lysogenic	VOG00935	sp|P20703|UVSW_BPT4 ATP-dependent DNA helicase uvsW	591	CDD	cd00046	DEXDc	52	187	2.33E-06	TRUE			OIP64149.1	51	400	188	5	29	424	4	399	1.90E-109	407.1	592	536	Ignavibacteriae	Ignavibacteria bacterium CG2_30_36_16	1805221	OIP64149.1 hypothetical protein AUK34_00305 [Ignavibacteria bacterium CG2_30_36_16]
Vedfolnir	Guay1_scaffold_2kb_Guay1_scaffold00443_1	(206..1981)	1	Thorarchaeota B59_G1 (CRISPR), Chloroflexi B30_G2, B4_G43	Lysogenic	VOG00935	sp|P20703|UVSW_BPT4 ATP-dependent DNA helicase uvsW	591	CDD	cd00046	DEXDc	52	187	2.33E-06	TRUE			WP_167112877.1	41.4	568	308	11	35	584	27	587	1.40E-109	407.5	592	587	Actinobacteria	Amycolatopsis viridis	185678	WP_167112877.1 DEAD/DEAH box helicase family protein [Amycolatopsis viridis]
Vedfolnir	Guay1_scaffold_2kb_Guay1_scaffold00443_1	(206..1981)	1	Thorarchaeota B59_G1 (CRISPR), Chloroflexi B30_G2, B4_G44	Lysogenic	VOG00935	sp|P20703|UVSW_BPT4 ATP-dependent DNA helicase uvsW	591	CDD	cd00046	DEXDc	52	187	2.33E-06	TRUE			WP_094009023.1	41.5	568	307	11	35	584	27	587	1.10E-109	407.9	592	587	Actinobacteria	Amycolatopsis;Amycolatopsis sp. KNN50.9b	1813;2018303	WP_094009023.1 MULTISPECIES: DEAD/DEAH box helicase [Amycolatopsis]
Vedfolnir	Guay1_scaffold_2kb_Guay1_scaffold00443_1	(206..1981)	1	Thorarchaeota B59_G1 (CRISPR), Chloroflexi B30_G2, B4_G45	Lysogenic	VOG00935	sp|P20703|UVSW_BPT4 ATP-dependent DNA helicase uvsW	591	CDD	cd00046	DEXDc	52	187	2.33E-06	TRUE			WP_034317045.1	41	576	298	12	35	584	25	584	8.40E-110	408.3	592	584	Actinobacteria	Actinobacteria;Amycolatopsis lurida;Amycolatopsis lurida NRRL 2430;Streptomyces sp. WAC 05977	1760;31959;1460371;2203208	WP_034317045.1 MULTISPECIES: DEAD/DEAH box helicase [Actinobacteria]
Vedfolnir	Guay1_scaffold_2kb_Guay1_scaffold00443_1	(206..1981)	1	Thorarchaeota B59_G1 (CRISPR), Chloroflexi B30_G2, B4_G46	Lysogenic	VOG00935	sp|P20703|UVSW_BPT4 ATP-dependent DNA helicase uvsW	591	CDD	cd00046	DEXDc	52	187	2.33E-06	TRUE			GHF17970.1	41.5	568	307	11	35	584	27	587	6.40E-110	408.7	592	587	N/A	N/A		GHF17970.1 hypothetical protein GCM10017786_59630 [Amycolatopsis deserti]
Vedfolnir	Guay1_scaffold_2kb_Guay1_scaffold00443_1	(206..1981)	1	Thorarchaeota B59_G1 (CRISPR), Chloroflexi B30_G2, B4_G47	Lysogenic	VOG00935	sp|P20703|UVSW_BPT4 ATP-dependent DNA helicase uvsW	591	CDD	cd00046	DEXDc	52	187	2.33E-06	TRUE			WP_017983720.1	41.7	568	306	11	35	584	27	587	3.80E-110	409.5	592	587	Actinobacteria	Amycolatopsis;Amycolatopsis eurytherma;Amycolatopsis methanolica 239	1813;196083;1068978	WP_017983720.1 MULTISPECIES: DEAD/DEAH box helicase [Amycolatopsis]
Vedfolnir	Guay1_scaffold_2kb_Guay1_scaffold00443_1	(206..1981)	1	Thorarchaeota B59_G1 (CRISPR), Chloroflexi B30_G2, B4_G48	Lysogenic	VOG00935	sp|P20703|UVSW_BPT4 ATP-dependent DNA helicase uvsW	591	CDD	cd00046	DEXDc	52	187	2.33E-06	TRUE			WP_027947051.1	41.9	568	305	11	35	584	24	584	9.00E-112	414.8	592	584	Actinobacteria	Amycolatopsis taiwanensis	342230	WP_027947051.1 DEAD/DEAH box helicase [Amycolatopsis taiwanensis]
Vedfolnir	Guay1_scaffold_2kb_Guay1_scaffold00443_1	(206..1981)	1	Thorarchaeota B59_G1 (CRISPR), Chloroflexi B30_G2, B4_G49	Lysogenic	VOG00935	sp|P20703|UVSW_BPT4 ATP-dependent DNA helicase uvsW	591	CDD	cd00046	DEXDc	52	187	2.33E-06	TRUE			NLT49910.1	52.6	397	181	4	29	421	4	397	4.80E-113	419.1	592	541	N/A	N/A		NLT49910.1 DEAD/DEAH box helicase [Ignavibacteria bacterium]
Vedfolnir	Guay1_scaffold_2kb_Guay1_scaffold00443_1	(206..1981)	1	Thorarchaeota B59_G1 (CRISPR), Chloroflexi B30_G2, B4_G50	Lysogenic	VOG00935	sp|P20703|UVSW_BPT4 ATP-dependent DNA helicase uvsW	591	CDD	cd00046	DEXDc	52	187	2.33E-06	TRUE			RLC82108.1	100	591	0	0	1	591	1	591	0	1170.6	592	591	Chloroflexi	Chloroflexi bacterium	2026724	RLC82108.1 ATP-dependent helicase [Chloroflexi bacterium]
Vedfolnir	Guay1_scaffold_2kb_Guay1_scaffold00443_1	(206..1981)	1	Thorarchaeota B59_G1 (CRISPR), Chloroflexi B30_G2, B4_G51	Lysogenic	VOG00935	sp|P20703|UVSW_BPT4 ATP-dependent DNA helicase uvsW	591	SUPERFAMILY	SSF52540	P-loop containing nucleoside triphosphate hydrolase	52	415	4.38E-18	TRUE	IPR027417	P-loop containing nucleoside triphosphate hydrolase	WP_167106941.1	42	572	299	13	35	584	27	587	1.90E-109	407.1	592	587	Actinobacteria	Amycolatopsis granulosa	185684	WP_167106941.1 DEAD/DEAH box helicase family protein [Amycolatopsis granulosa]
Vedfolnir	Guay1_scaffold_2kb_Guay1_scaffold00443_1	(206..1981)	1	Thorarchaeota B59_G1 (CRISPR), Chloroflexi B30_G2, B4_G52	Lysogenic	VOG00935	sp|P20703|UVSW_BPT4 ATP-dependent DNA helicase uvsW	591	SUPERFAMILY	SSF52540	P-loop containing nucleoside triphosphate hydrolase	52	415	4.38E-18	TRUE	IPR027417	P-loop containing nucleoside triphosphate hydrolase	OIP64149.1	51	400	188	5	29	424	4	399	1.90E-109	407.1	592	536	Ignavibacteriae	Ignavibacteria bacterium CG2_30_36_16	1805221	OIP64149.1 hypothetical protein AUK34_00305 [Ignavibacteria bacterium CG2_30_36_16]
Vedfolnir	Guay1_scaffold_2kb_Guay1_scaffold00443_1	(206..1981)	1	Thorarchaeota B59_G1 (CRISPR), Chloroflexi B30_G2, B4_G53	Lysogenic	VOG00935	sp|P20703|UVSW_BPT4 ATP-dependent DNA helicase uvsW	591	SUPERFAMILY	SSF52540	P-loop containing nucleoside triphosphate hydrolase	52	415	4.38E-18	TRUE	IPR027417	P-loop containing nucleoside triphosphate hydrolase	WP_167112877.1	41.4	568	308	11	35	584	27	587	1.40E-109	407.5	592	587	Actinobacteria	Amycolatopsis viridis	185678	WP_167112877.1 DEAD/DEAH box helicase family protein [Amycolatopsis viridis]
Vedfolnir	Guay1_scaffold_2kb_Guay1_scaffold00443_1	(206..1981)	1	Thorarchaeota B59_G1 (CRISPR), Chloroflexi B30_G2, B4_G54	Lysogenic	VOG00935	sp|P20703|UVSW_BPT4 ATP-dependent DNA helicase uvsW	591	SUPERFAMILY	SSF52540	P-loop containing nucleoside triphosphate hydrolase	52	415	4.38E-18	TRUE	IPR027417	P-loop containing nucleoside triphosphate hydrolase	WP_094009023.1	41.5	568	307	11	35	584	27	587	1.10E-109	407.9	592	587	Actinobacteria	Amycolatopsis;Amycolatopsis sp. KNN50.9b	1813;2018303	WP_094009023.1 MULTISPECIES: DEAD/DEAH box helicase [Amycolatopsis]
Vedfolnir	Guay1_scaffold_2kb_Guay1_scaffold00443_1	(206..1981)	1	Thorarchaeota B59_G1 (CRISPR), Chloroflexi B30_G2, B4_G55	Lysogenic	VOG00935	sp|P20703|UVSW_BPT4 ATP-dependent DNA helicase uvsW	591	SUPERFAMILY	SSF52540	P-loop containing nucleoside triphosphate hydrolase	52	415	4.38E-18	TRUE	IPR027417	P-loop containing nucleoside triphosphate hydrolase	WP_034317045.1	41	576	298	12	35	584	25	584	8.40E-110	408.3	592	584	Actinobacteria	Actinobacteria;Amycolatopsis lurida;Amycolatopsis lurida NRRL 2430;Streptomyces sp. WAC 05977	1760;31959;1460371;2203208	WP_034317045.1 MULTISPECIES: DEAD/DEAH box helicase [Actinobacteria]
Vedfolnir	Guay1_scaffold_2kb_Guay1_scaffold00443_1	(206..1981)	1	Thorarchaeota B59_G1 (CRISPR), Chloroflexi B30_G2, B4_G56	Lysogenic	VOG00935	sp|P20703|UVSW_BPT4 ATP-dependent DNA helicase uvsW	591	SUPERFAMILY	SSF52540	P-loop containing nucleoside triphosphate hydrolase	52	415	4.38E-18	TRUE	IPR027417	P-loop containing nucleoside triphosphate hydrolase	GHF17970.1	41.5	568	307	11	35	584	27	587	6.40E-110	408.7	592	587	N/A	N/A		GHF17970.1 hypothetical protein GCM10017786_59630 [Amycolatopsis deserti]
Vedfolnir	Guay1_scaffold_2kb_Guay1_scaffold00443_1	(206..1981)	1	Thorarchaeota B59_G1 (CRISPR), Chloroflexi B30_G2, B4_G57	Lysogenic	VOG00935	sp|P20703|UVSW_BPT4 ATP-dependent DNA helicase uvsW	591	SUPERFAMILY	SSF52540	P-loop containing nucleoside triphosphate hydrolase	52	415	4.38E-18	TRUE	IPR027417	P-loop containing nucleoside triphosphate hydrolase	WP_017983720.1	41.7	568	306	11	35	584	27	587	3.80E-110	409.5	592	587	Actinobacteria	Amycolatopsis;Amycolatopsis eurytherma;Amycolatopsis methanolica 239	1813;196083;1068978	WP_017983720.1 MULTISPECIES: DEAD/DEAH box helicase [Amycolatopsis]
Vedfolnir	Guay1_scaffold_2kb_Guay1_scaffold00443_1	(206..1981)	1	Thorarchaeota B59_G1 (CRISPR), Chloroflexi B30_G2, B4_G58	Lysogenic	VOG00935	sp|P20703|UVSW_BPT4 ATP-dependent DNA helicase uvsW	591	SUPERFAMILY	SSF52540	P-loop containing nucleoside triphosphate hydrolase	52	415	4.38E-18	TRUE	IPR027417	P-loop containing nucleoside triphosphate hydrolase	WP_027947051.1	41.9	568	305	11	35	584	24	584	9.00E-112	414.8	592	584	Actinobacteria	Amycolatopsis taiwanensis	342230	WP_027947051.1 DEAD/DEAH box helicase [Amycolatopsis taiwanensis]
Vedfolnir	Guay1_scaffold_2kb_Guay1_scaffold00443_1	(206..1981)	1	Thorarchaeota B59_G1 (CRISPR), Chloroflexi B30_G2, B4_G59	Lysogenic	VOG00935	sp|P20703|UVSW_BPT4 ATP-dependent DNA helicase uvsW	591	SUPERFAMILY	SSF52540	P-loop containing nucleoside triphosphate hydrolase	52	415	4.38E-18	TRUE	IPR027417	P-loop containing nucleoside triphosphate hydrolase	NLT49910.1	52.6	397	181	4	29	421	4	397	4.80E-113	419.1	592	541	N/A	N/A		NLT49910.1 DEAD/DEAH box helicase [Ignavibacteria bacterium]
Vedfolnir	Guay1_scaffold_2kb_Guay1_scaffold00443_1	(206..1981)	1	Thorarchaeota B59_G1 (CRISPR), Chloroflexi B30_G2, B4_G60	Lysogenic	VOG00935	sp|P20703|UVSW_BPT4 ATP-dependent DNA helicase uvsW	591	SUPERFAMILY	SSF52540	P-loop containing nucleoside triphosphate hydrolase	52	415	4.38E-18	TRUE	IPR027417	P-loop containing nucleoside triphosphate hydrolase	RLC82108.1	100	591	0	0	1	591	1	591	0	1170.6	592	591	Chloroflexi	Chloroflexi bacterium	2026724	RLC82108.1 ATP-dependent helicase [Chloroflexi bacterium]
Vedfolnir	Guay1_scaffold_2kb_Guay1_scaffold00443_1	(206..1981)	1	Thorarchaeota B59_G1 (CRISPR), Chloroflexi B30_G2, B4_G61	Lysogenic	VOG00935	sp|P20703|UVSW_BPT4 ATP-dependent DNA helicase uvsW	591	Gene3D	G3DSA:3.40.50.300	P-loop containing nucleotide triphosphate hydrolases	212	420	3.10E-18	TRUE			WP_167106941.1	42	572	299	13	35	584	27	587	1.90E-109	407.1	592	587	Actinobacteria	Amycolatopsis granulosa	185684	WP_167106941.1 DEAD/DEAH box helicase family protein [Amycolatopsis granulosa]
Vedfolnir	Guay1_scaffold_2kb_Guay1_scaffold00443_1	(206..1981)	1	Thorarchaeota B59_G1 (CRISPR), Chloroflexi B30_G2, B4_G62	Lysogenic	VOG00935	sp|P20703|UVSW_BPT4 ATP-dependent DNA helicase uvsW	591	Gene3D	G3DSA:3.40.50.300	P-loop containing nucleotide triphosphate hydrolases	212	420	3.10E-18	TRUE			OIP64149.1	51	400	188	5	29	424	4	399	1.90E-109	407.1	592	536	Ignavibacteriae	Ignavibacteria bacterium CG2_30_36_16	1805221	OIP64149.1 hypothetical protein AUK34_00305 [Ignavibacteria bacterium CG2_30_36_16]
Vedfolnir	Guay1_scaffold_2kb_Guay1_scaffold00443_1	(206..1981)	1	Thorarchaeota B59_G1 (CRISPR), Chloroflexi B30_G2, B4_G63	Lysogenic	VOG00935	sp|P20703|UVSW_BPT4 ATP-dependent DNA helicase uvsW	591	Gene3D	G3DSA:3.40.50.300	P-loop containing nucleotide triphosphate hydrolases	212	420	3.10E-18	TRUE			WP_167112877.1	41.4	568	308	11	35	584	27	587	1.40E-109	407.5	592	587	Actinobacteria	Amycolatopsis viridis	185678	WP_167112877.1 DEAD/DEAH box helicase family protein [Amycolatopsis viridis]
Vedfolnir	Guay1_scaffold_2kb_Guay1_scaffold00443_1	(206..1981)	1	Thorarchaeota B59_G1 (CRISPR), Chloroflexi B30_G2, B4_G64	Lysogenic	VOG00935	sp|P20703|UVSW_BPT4 ATP-dependent DNA helicase uvsW	591	Gene3D	G3DSA:3.40.50.300	P-loop containing nucleotide triphosphate hydrolases	212	420	3.10E-18	TRUE			WP_094009023.1	41.5	568	307	11	35	584	27	587	1.10E-109	407.9	592	587	Actinobacteria	Amycolatopsis;Amycolatopsis sp. KNN50.9b	1813;2018303	WP_094009023.1 MULTISPECIES: DEAD/DEAH box helicase [Amycolatopsis]
Vedfolnir	Guay1_scaffold_2kb_Guay1_scaffold00443_1	(206..1981)	1	Thorarchaeota B59_G1 (CRISPR), Chloroflexi B30_G2, B4_G65	Lysogenic	VOG00935	sp|P20703|UVSW_BPT4 ATP-dependent DNA helicase uvsW	591	Gene3D	G3DSA:3.40.50.300	P-loop containing nucleotide triphosphate hydrolases	212	420	3.10E-18	TRUE			WP_034317045.1	41	576	298	12	35	584	25	584	8.40E-110	408.3	592	584	Actinobacteria	Actinobacteria;Amycolatopsis lurida;Amycolatopsis lurida NRRL 2430;Streptomyces sp. WAC 05977	1760;31959;1460371;2203208	WP_034317045.1 MULTISPECIES: DEAD/DEAH box helicase [Actinobacteria]
Vedfolnir	Guay1_scaffold_2kb_Guay1_scaffold00443_1	(206..1981)	1	Thorarchaeota B59_G1 (CRISPR), Chloroflexi B30_G2, B4_G66	Lysogenic	VOG00935	sp|P20703|UVSW_BPT4 ATP-dependent DNA helicase uvsW	591	Gene3D	G3DSA:3.40.50.300	P-loop containing nucleotide triphosphate hydrolases	212	420	3.10E-18	TRUE			GHF17970.1	41.5	568	307	11	35	584	27	587	6.40E-110	408.7	592	587	N/A	N/A		GHF17970.1 hypothetical protein GCM10017786_59630 [Amycolatopsis deserti]
Vedfolnir	Guay1_scaffold_2kb_Guay1_scaffold00443_1	(206..1981)	1	Thorarchaeota B59_G1 (CRISPR), Chloroflexi B30_G2, B4_G67	Lysogenic	VOG00935	sp|P20703|UVSW_BPT4 ATP-dependent DNA helicase uvsW	591	Gene3D	G3DSA:3.40.50.300	P-loop containing nucleotide triphosphate hydrolases	212	420	3.10E-18	TRUE			WP_017983720.1	41.7	568	306	11	35	584	27	587	3.80E-110	409.5	592	587	Actinobacteria	Amycolatopsis;Amycolatopsis eurytherma;Amycolatopsis methanolica 239	1813;196083;1068978	WP_017983720.1 MULTISPECIES: DEAD/DEAH box helicase [Amycolatopsis]
Vedfolnir	Guay1_scaffold_2kb_Guay1_scaffold00443_1	(206..1981)	1	Thorarchaeota B59_G1 (CRISPR), Chloroflexi B30_G2, B4_G68	Lysogenic	VOG00935	sp|P20703|UVSW_BPT4 ATP-dependent DNA helicase uvsW	591	Gene3D	G3DSA:3.40.50.300	P-loop containing nucleotide triphosphate hydrolases	212	420	3.10E-18	TRUE			WP_027947051.1	41.9	568	305	11	35	584	24	584	9.00E-112	414.8	592	584	Actinobacteria	Amycolatopsis taiwanensis	342230	WP_027947051.1 DEAD/DEAH box helicase [Amycolatopsis taiwanensis]
Vedfolnir	Guay1_scaffold_2kb_Guay1_scaffold00443_1	(206..1981)	1	Thorarchaeota B59_G1 (CRISPR), Chloroflexi B30_G2, B4_G69	Lysogenic	VOG00935	sp|P20703|UVSW_BPT4 ATP-dependent DNA helicase uvsW	591	Gene3D	G3DSA:3.40.50.300	P-loop containing nucleotide triphosphate hydrolases	212	420	3.10E-18	TRUE			NLT49910.1	52.6	397	181	4	29	421	4	397	4.80E-113	419.1	592	541	N/A	N/A		NLT49910.1 DEAD/DEAH box helicase [Ignavibacteria bacterium]
Vedfolnir	Guay1_scaffold_2kb_Guay1_scaffold00443_1	(206..1981)	1	Thorarchaeota B59_G1 (CRISPR), Chloroflexi B30_G2, B4_G70	Lysogenic	VOG00935	sp|P20703|UVSW_BPT4 ATP-dependent DNA helicase uvsW	591	Gene3D	G3DSA:3.40.50.300	P-loop containing nucleotide triphosphate hydrolases	212	420	3.10E-18	TRUE			RLC82108.1	100	591	0	0	1	591	1	591	0	1170.6	592	591	Chloroflexi	Chloroflexi bacterium	2026724	RLC82108.1 ATP-dependent helicase [Chloroflexi bacterium]
Vedfolnir	Guay1_scaffold_2kb_Guay1_scaffold00443_2	(1978..2538)	1	Thorarchaeota B59_G1 (CRISPR), Chloroflexi B30_G2, B4_G71	Lysogenic	K02347	polX, dpx; DNA polymerase (family X)	186	Gene3D	G3DSA:3.30.460.10	Beta Polymerase	1	117	5.60E-13	TRUE			OGC95292.1	44.2	190	91	5	1	186	1	179	1.90E-28	136.3	187	184	Chloroflexi;candidate division Zixibacteria	Chloroflexi bacterium RBG_19FT_COMBO_47_9;candidate division Zixibacteria bacterium RBG_16_53_22	1797665;1802787
Vedfolnir	Guay1_scaffold_2kb_Guay1_scaffold00443_2	(1978..2538)	1	Thorarchaeota B59_G1 (CRISPR), Chloroflexi B30_G2, B4_G72	Lysogenic	K02347	polX, dpx; DNA polymerase (family X)	186	Gene3D	G3DSA:3.30.460.10	Beta Polymerase	1	117	5.60E-13	TRUE			RJP53605.1	42.9	210	89	6	1	180	1	209	4.60E-30	141.7	187	214	Chloroflexi	Anaerolineaceae bacterium	2024896	RJP53605.1 hypothetical protein C4583_04265 [Anaerolineaceae bacterium]
Vedfolnir	Guay1_scaffold_2kb_Guay1_scaffold00443_2	(1978..2538)	1	Thorarchaeota B59_G1 (CRISPR), Chloroflexi B30_G2, B4_G73	Lysogenic	K02347	polX, dpx; DNA polymerase (family X)	186	Gene3D	G3DSA:3.30.460.10	Beta Polymerase	1	117	5.60E-13	TRUE			WP_013560585.1	50.6	174	73	4	6	179	10	170	1.10E-31	147.1	187	171	Chloroflexi	Anaerolinea thermophila;Anaerolinea thermophila UNI-1	167964;926569	WP_013560585.1 hypothetical protein [Anaerolinea thermophila]
Vedfolnir	Guay1_scaffold_2kb_Guay1_scaffold00443_2	(1978..2538)	1	Thorarchaeota B59_G1 (CRISPR), Chloroflexi B30_G2, B4_G74	Lysogenic	K02347	polX, dpx; DNA polymerase (family X)	186	Gene3D	G3DSA:3.30.460.10	Beta Polymerase	1	117	5.60E-13	TRUE			WP_061918912.1	54.7	179	68	3	1	179	5	170	4.60E-38	168.3	187	171	Chloroflexi	Bellilinea caldifistulae	360411	WP_061918912.1 hypothetical protein [Bellilinea caldifistulae]
Vedfolnir	Guay1_scaffold_2kb_Guay1_scaffold00443_2	(1978..2538)	1	Thorarchaeota B59_G1 (CRISPR), Chloroflexi B30_G2, B4_G75	Lysogenic	K02347	polX, dpx; DNA polymerase (family X)	186	Gene3D	G3DSA:3.30.460.10	Beta Polymerase	1	117	5.60E-13	TRUE			WP_062193850.1	54.6	174	67	3	6	179	10	171	1.20E-38	170.2	187	172	Chloroflexi	Anaerolinea thermolimosa	229919	WP_062193850.1 hypothetical protein [Anaerolinea thermolimosa]
Vedfolnir	Guay1_scaffold_2kb_Guay1_scaffold00443_2	(1978..2538)	1	Thorarchaeota B59_G1 (CRISPR), Chloroflexi B30_G2, B4_G76	Lysogenic	K02347	polX, dpx; DNA polymerase (family X)	186	Gene3D	G3DSA:3.30.460.10	Beta Polymerase	1	117	5.60E-13	TRUE			HID85701.1	48.9	178	79	3	6	181	10	177	5.50E-39	171.4	187	186	N/A	N/A		HID85701.1 hypothetical protein [Anaerolineales bacterium]
Vedfolnir	Guay1_scaffold_2kb_Guay1_scaffold00443_2	(1978..2538)	1	Thorarchaeota B59_G1 (CRISPR), Chloroflexi B30_G2, B4_G77	Lysogenic	K02347	polX, dpx; DNA polymerase (family X)	186	Gene3D	G3DSA:3.30.460.10	Beta Polymerase	1	117	5.60E-13	TRUE			WP_061917445.1	52.9	174	69	2	6	179	10	170	1.10E-39	173.7	187	171	Chloroflexi	Bellilinea caldifistulae	360411	WP_061917445.1 hypothetical protein [Bellilinea caldifistulae]
Vedfolnir	Guay1_scaffold_2kb_Guay1_scaffold00443_2	(1978..2538)	1	Thorarchaeota B59_G1 (CRISPR), Chloroflexi B30_G2, B4_G78	Lysogenic	K02347	polX, dpx; DNA polymerase (family X)	186	Gene3D	G3DSA:3.30.460.10	Beta Polymerase	1	117	5.60E-13	TRUE			WP_062190428.1	54.9	182	69	3	1	182	5	173	2.60E-41	179.1	187	178	Chloroflexi	Anaerolinea thermolimosa	229919	WP_062190428.1 hypothetical protein [Anaerolinea thermolimosa]
Vedfolnir	Guay1_scaffold_2kb_Guay1_scaffold00443_2	(1978..2538)	1	Thorarchaeota B59_G1 (CRISPR), Chloroflexi B30_G2, B4_G79	Lysogenic	K02347	polX, dpx; DNA polymerase (family X)	186	Gene3D	G3DSA:3.30.460.10	Beta Polymerase	1	117	5.60E-13	TRUE			HCE17666.1	57	179	64	3	1	179	22	187	2.40E-42	182.6	187	188	N/A	N/A		HCE17666.1 hypothetical protein [Anaerolinea thermolimosa]
Vedfolnir	Guay1_scaffold_2kb_Guay1_scaffold00443_2	(1978..2538)	1	Thorarchaeota B59_G1 (CRISPR), Chloroflexi B30_G2, B4_G80	Lysogenic	K02347	polX, dpx; DNA polymerase (family X)	186	Gene3D	G3DSA:3.30.460.10	Beta Polymerase	1	117	5.60E-13	TRUE			RLC82109.1	100	186	0	0	1	186	1	186	7.00E-103	383.6	187	186	Chloroflexi	Chloroflexi bacterium	2026724	RLC82109.1 hypothetical protein DRI81_00600 [Chloroflexi bacterium]
Vedfolnir	Guay1_scaffold_2kb_Guay1_scaffold00443_2	(1978..2538)	1	Thorarchaeota B59_G1 (CRISPR), Chloroflexi B30_G2, B4_G81	Lysogenic	K02347	polX, dpx; DNA polymerase (family X)	186	SUPERFAMILY	SSF81301	Nucleotidyltransferase superfamily	22	179	7.19E-12	TRUE			OGC95292.1	44.2	190	91	5	1	186	1	179	1.90E-28	136.3	187	184	Chloroflexi;candidate division Zixibacteria	Chloroflexi bacterium RBG_19FT_COMBO_47_9;candidate division Zixibacteria bacterium RBG_16_53_22	1797665;1802787	OGC95292.1 hypothetical protein A2W25_05085 [candidate division Zixibacteria bacterium RBG_16_53_22]
Vedfolnir	Guay1_scaffold_2kb_Guay1_scaffold00443_2	(1978..2538)	1	Thorarchaeota B59_G1 (CRISPR), Chloroflexi B30_G2, B4_G82	Lysogenic	K02347	polX, dpx; DNA polymerase (family X)	186	SUPERFAMILY	SSF81301	Nucleotidyltransferase superfamily	22	179	7.19E-12	TRUE			RJP53605.1	42.9	210	89	6	1	180	1	209	4.60E-30	141.7	187	214	Chloroflexi	Anaerolineaceae bacterium	2024896	RJP53605.1 hypothetical protein C4583_04265 [Anaerolineaceae bacterium]
Vedfolnir	Guay1_scaffold_2kb_Guay1_scaffold00443_2	(1978..2538)	1	Thorarchaeota B59_G1 (CRISPR), Chloroflexi B30_G2, B4_G83	Lysogenic	K02347	polX, dpx; DNA polymerase (family X)	186	SUPERFAMILY	SSF81301	Nucleotidyltransferase superfamily	22	179	7.19E-12	TRUE			WP_013560585.1	50.6	174	73	4	6	179	10	170	1.10E-31	147.1	187	171	Chloroflexi	Anaerolinea thermophila;Anaerolinea thermophila UNI-1	167964;926569	WP_013560585.1 hypothetical protein [Anaerolinea thermophila]
Vedfolnir	Guay1_scaffold_2kb_Guay1_scaffold00443_2	(1978..2538)	1	Thorarchaeota B59_G1 (CRISPR), Chloroflexi B30_G2, B4_G84	Lysogenic	K02347	polX, dpx; DNA polymerase (family X)	186	SUPERFAMILY	SSF81301	Nucleotidyltransferase superfamily	22	179	7.19E-12	TRUE			WP_061918912.1	54.7	179	68	3	1	179	5	170	4.60E-38	168.3	187	171	Chloroflexi	Bellilinea caldifistulae	360411	WP_061918912.1 hypothetical protein [Bellilinea caldifistulae]
Vedfolnir	Guay1_scaffold_2kb_Guay1_scaffold00443_2	(1978..2538)	1	Thorarchaeota B59_G1 (CRISPR), Chloroflexi B30_G2, B4_G85	Lysogenic	K02347	polX, dpx; DNA polymerase (family X)	186	SUPERFAMILY	SSF81301	Nucleotidyltransferase superfamily	22	179	7.19E-12	TRUE			WP_062193850.1	54.6	174	67	3	6	179	10	171	1.20E-38	170.2	187	172	Chloroflexi	Anaerolinea thermolimosa	229919	WP_062193850.1 hypothetical protein [Anaerolinea thermolimosa]
Vedfolnir	Guay1_scaffold_2kb_Guay1_scaffold00443_2	(1978..2538)	1	Thorarchaeota B59_G1 (CRISPR), Chloroflexi B30_G2, B4_G86	Lysogenic	K02347	polX, dpx; DNA polymerase (family X)	186	SUPERFAMILY	SSF81301	Nucleotidyltransferase superfamily	22	179	7.19E-12	TRUE			HID85701.1	48.9	178	79	3	6	181	10	177	5.50E-39	171.4	187	186	N/A	N/A		HID85701.1 hypothetical protein [Anaerolineales bacterium]
Vedfolnir	Guay1_scaffold_2kb_Guay1_scaffold00443_2	(1978..2538)	1	Thorarchaeota B59_G1 (CRISPR), Chloroflexi B30_G2, B4_G87	Lysogenic	K02347	polX, dpx; DNA polymerase (family X)	186	SUPERFAMILY	SSF81301	Nucleotidyltransferase superfamily	22	179	7.19E-12	TRUE			WP_061917445.1	52.9	174	69	2	6	179	10	170	1.10E-39	173.7	187	171	Chloroflexi	Bellilinea caldifistulae	360411	WP_061917445.1 hypothetical protein [Bellilinea caldifistulae]
Vedfolnir	Guay1_scaffold_2kb_Guay1_scaffold00443_2	(1978..2538)	1	Thorarchaeota B59_G1 (CRISPR), Chloroflexi B30_G2, B4_G88	Lysogenic	K02347	polX, dpx; DNA polymerase (family X)	186	SUPERFAMILY	SSF81301	Nucleotidyltransferase superfamily	22	179	7.19E-12	TRUE			WP_062190428.1	54.9	182	69	3	1	182	5	173	2.60E-41	179.1	187	178	Chloroflexi	Anaerolinea thermolimosa	229919	WP_062190428.1 hypothetical protein [Anaerolinea thermolimosa]
Vedfolnir	Guay1_scaffold_2kb_Guay1_scaffold00443_2	(1978..2538)	1	Thorarchaeota B59_G1 (CRISPR), Chloroflexi B30_G2, B4_G89	Lysogenic	K02347	polX, dpx; DNA polymerase (family X)	186	SUPERFAMILY	SSF81301	Nucleotidyltransferase superfamily	22	179	7.19E-12	TRUE			HCE17666.1	57	179	64	3	1	179	22	187	2.40E-42	182.6	187	188	N/A	N/A		HCE17666.1 hypothetical protein [Anaerolinea thermolimosa]
Vedfolnir	Guay1_scaffold_2kb_Guay1_scaffold00443_2	(1978..2538)	1	Thorarchaeota B59_G1 (CRISPR), Chloroflexi B30_G2, B4_G90	Lysogenic	K02347	polX, dpx; DNA polymerase (family X)	186	SUPERFAMILY	SSF81301	Nucleotidyltransferase superfamily	22	179	7.19E-12	TRUE			RLC82109.1	100	186	0	0	1	186	1	186	7.00E-103	383.6	187	186	Chloroflexi	Chloroflexi bacterium	2026724	RLC82109.1 hypothetical protein DRI81_00600 [Chloroflexi bacterium]
Vedfolnir	Guay1_scaffold_2kb_Guay1_scaffold00443_3	(2570..3463)	1	Thorarchaeota B59_G1 (CRISPR), Chloroflexi B30_G2, B4_G91	Lysogenic	None	hypothetical protein	NA	NA	NA	NA	NA	NA	NA	NA	NA	NA	NSW82560.1	34.2	114	74	1	4	116	6	119	1.50E-06	64.3	298	317	N/A	N/A		NSW82560.1 phage replisome organizer N-terminal domain-containing protein [Syntrophothermus sp.]
Vedfolnir	Guay1_scaffold_2kb_Guay1_scaffold00443_3	(2570..3463)	1	Thorarchaeota B59_G1 (CRISPR), Chloroflexi B30_G2, B4_G92	Lysogenic	None	hypothetical protein	NA	NA	NA	NA	NA	NA	NA	NA	NA	NA	PMQ02385.1	35	117	71	1	3	119	5	116	3.00E-07	66.6	298	236	Dictyoglomi	Dictyoglomus sp. NZ13-RE01	2010949	PMQ02385.1 hypothetical protein CBR30_01715 [Dictyoglomus sp. NZ13-RE01]
Vedfolnir	Guay1_scaffold_2kb_Guay1_scaffold00443_3	(2570..3463)	1	Thorarchaeota B59_G1 (CRISPR), Chloroflexi B30_G2, B4_G93	Lysogenic	None	hypothetical protein	NA	NA	NA	NA	NA	NA	NA	NA	NA	NA	MBC2723508.1	35.7	129	76	2	4	125	6	134	7.90E-08	68.6	298	299	N/A	N/A		MBC2723508.1 DnaD domain protein [Desulfosporosinus sp.]
Vedfolnir	Guay1_scaffold_2kb_Guay1_scaffold00443_3	(2570..3463)	1	Thorarchaeota B59_G1 (CRISPR), Chloroflexi B30_G2, B4_G94	Lysogenic	None	hypothetical protein	NA	NA	NA	NA	NA	NA	NA	NA	NA	NA	PWH20982.1	44.3	106	58	1	1	105	1	106	1.10E-17	101.3	298	400	Chloroflexi	Ardenticatenia bacterium	2099665	PWH20982.1 hypothetical protein DDG58_00105, partial [Ardenticatenia bacterium]
Vedfolnir	Guay1_scaffold_2kb_Guay1_scaffold00443_3	(2570..3463)	1	Thorarchaeota B59_G1 (CRISPR), Chloroflexi B30_G2, B4_G95	Lysogenic	None	hypothetical protein	NA	NA	NA	NA	NA	NA	NA	NA	NA	NA	NLG06827.1	44.9	245	116	2	1	245	1	226	7.10E-33	151.8	298	273	N/A	N/A		NLG06827.1 hypothetical protein [Candidatus Pacebacteria bacterium]
Vedfolnir	Guay1_scaffold_2kb_Guay1_scaffold00443_3	(2570..3463)	1	Thorarchaeota B59_G1 (CRISPR), Chloroflexi B30_G2, B4_G96	Lysogenic	None	hypothetical protein	NA	NA	NA	NA	NA	NA	NA	NA	NA	NA	NLG64451.1	65.9	126	43	0	1	126	1	126	5.60E-38	168.7	298	202	N/A	N/A		NLG64451.1 hypothetical protein [Actinobacteria bacterium]
Vedfolnir	Guay1_scaffold_2kb_Guay1_scaffold00443_3	(2570..3463)	1	Thorarchaeota B59_G1 (CRISPR), Chloroflexi B30_G2, B4_G97	Lysogenic	None	hypothetical protein	NA	NA	NA	NA	NA	NA	NA	NA	NA	NA	OPZ85775.1	65.9	126	43	0	1	126	1	126	5.60E-38	168.7	298	275	0	bacterium ADurb.Bin429	1866930	OPZ85775.1 hypothetical protein BWY76_01267 [bacterium ADurb.Bin429]
Vedfolnir	Guay1_scaffold_2kb_Guay1_scaffold00443_4	(3555..4214)	1	Thorarchaeota B59_G1 (CRISPR), Chloroflexi B30_G2, B4_G98	Lysogenic	K02315	dnaC; DNA replication protein DnaC	219	Gene3D	G3DSA:3.40.50.300	P-loop containing nucleotide triphosphate hydrolases	28	219	5.80E-35	TRUE			WP_098236958.1	42.7	124	68	2	79	201	121	242	3.30E-19	105.9	220	267	Firmicutes	Bacillus thuringiensis	1428	WP_098236958.1 ATP-binding protein [Bacillus thuringiensis]
Vedfolnir	Guay1_scaffold_2kb_Guay1_scaffold00443_4	(3555..4214)	1	Thorarchaeota B59_G1 (CRISPR), Chloroflexi B30_G2, B4_G99	Lysogenic	K02315	dnaC; DNA replication protein DnaC	219	Gene3D	G3DSA:3.40.50.300	P-loop containing nucleotide triphosphate hydrolases	28	219	5.80E-35	TRUE			WP_098663997.1	43.5	124	67	2	79	201	121	242	3.30E-19	105.9	220	265	Firmicutes	Bacillus cereus	1396	WP_098663997.1 ATP-binding protein [Bacillus cereus]
Vedfolnir	Guay1_scaffold_2kb_Guay1_scaffold00443_4	(3555..4214)	1	Thorarchaeota B59_G1 (CRISPR), Chloroflexi B30_G2, B4_G100	Lysogenic	K02315	dnaC; DNA replication protein DnaC	219	Gene3D	G3DSA:3.40.50.300	P-loop containing nucleotide triphosphate hydrolases	28	219	5.80E-35	TRUE			WP_163247612.1	43.5	124	67	2	79	201	121	242	3.30E-19	105.9	220	267	Firmicutes	Bacillus tropicus	2026188	WP_163247612.1 ATP-binding protein [Bacillus tropicus]
Vedfolnir	Guay1_scaffold_2kb_Guay1_scaffold00443_4	(3555..4214)	1	Thorarchaeota B59_G1 (CRISPR), Chloroflexi B30_G2, B4_G101	Lysogenic	K02315	dnaC; DNA replication protein DnaC	219	Gene3D	G3DSA:3.40.50.300	P-loop containing nucleotide triphosphate hydrolases	28	219	5.80E-35	TRUE			WP_098770470.1	43.5	124	67	2	79	201	121	242	3.30E-19	105.9	220	267	Firmicutes	Bacillus cereus	1396	WP_098770470.1 ATP-binding protein [Bacillus cereus]
Vedfolnir	Guay1_scaffold_2kb_Guay1_scaffold00443_4	(3555..4214)	1	Thorarchaeota B59_G1 (CRISPR), Chloroflexi B30_G2, B4_G102	Lysogenic	K02315	dnaC; DNA replication protein DnaC	219	Gene3D	G3DSA:3.40.50.300	P-loop containing nucleotide triphosphate hydrolases	28	219	5.80E-35	TRUE			WP_098368289.1	43.5	124	67	2	79	201	121	242	2.50E-19	106.3	220	267	Firmicutes	Bacillus thuringiensis	1428	WP_098368289.1 ATP-binding protein [Bacillus thuringiensis]
Vedfolnir	Guay1_scaffold_2kb_Guay1_scaffold00443_4	(3555..4214)	1	Thorarchaeota B59_G1 (CRISPR), Chloroflexi B30_G2, B4_G103	Lysogenic	K02315	dnaC; DNA replication protein DnaC	219	Gene3D	G3DSA:3.40.50.300	P-loop containing nucleotide triphosphate hydrolases	28	219	5.80E-35	TRUE			WP_070183610.1	43.5	124	67	2	79	201	129	250	1.90E-19	106.7	220	275	Firmicutes	Bacillus thuringiensis	1428	WP_070183610.1 ATP-binding protein [Bacillus thuringiensis]
Vedfolnir	Guay1_scaffold_2kb_Guay1_scaffold00443_4	(3555..4214)	1	Thorarchaeota B59_G1 (CRISPR), Chloroflexi B30_G2, B4_G104	Lysogenic	K02315	dnaC; DNA replication protein DnaC	219	Gene3D	G3DSA:3.40.50.300	P-loop containing nucleotide triphosphate hydrolases	28	219	5.80E-35	TRUE			EEM38245.1	43.5	124	67	2	79	201	79	200	1.90E-19	106.7	220	225	Firmicutes	Bacillus thuringiensis serovar sotto str. T04001	527026	EEM38245.1 Prophage LambdaBa02, DNA replication protein DnaC [Bacillus thuringiensis serovar sotto str. T04001]
Vedfolnir	Guay1_scaffold_2kb_Guay1_scaffold00443_4	(3555..4214)	1	Thorarchaeota B59_G1 (CRISPR), Chloroflexi B30_G2, B4_G105	Lysogenic	K02315	dnaC; DNA replication protein DnaC	219	Gene3D	G3DSA:3.40.50.300	P-loop containing nucleotide triphosphate hydrolases	28	219	5.80E-35	TRUE			WP_131102245.1	43.5	124	67	2	79	201	121	242	1.50E-19	107.1	220	267	Firmicutes	Bacillus sp. SYJ	2529386	WP_131102245.1 ATP-binding protein [Bacillus sp. SYJ]
Vedfolnir	Guay1_scaffold_2kb_Guay1_scaffold00443_4	(3555..4214)	1	Thorarchaeota B59_G1 (CRISPR), Chloroflexi B30_G2, B4_G106	Lysogenic	K02315	dnaC; DNA replication protein DnaC	219	Gene3D	G3DSA:3.40.50.300	P-loop containing nucleotide triphosphate hydrolases	28	219	5.80E-35	TRUE			WP_139226488.1	36.2	174	94	5	32	201	88	248	7.90E-21	111.3	220	275	Firmicutes	Bacillus sp. UNCCL81	1502755	WP_139226488.1 ATP-binding protein [Bacillus sp. UNCCL81]
Vedfolnir	Guay1_scaffold_2kb_Guay1_scaffold00443_4	(3555..4214)	1	Thorarchaeota B59_G1 (CRISPR), Chloroflexi B30_G2, B4_G107	Lysogenic	K02315	dnaC; DNA replication protein DnaC	219	Gene3D	G3DSA:3.40.50.300	P-loop containing nucleotide triphosphate hydrolases	28	219	5.80E-35	TRUE			RLC82110.1	100	219	0	0	1	219	82	300	1.50E-125	459.1	220	300	Chloroflexi	Chloroflexi bacterium	2026724	RLC82110.1 hypothetical protein DRI81_00605 [Chloroflexi bacterium]
Vedfolnir	Guay1_scaffold_2kb_Guay1_scaffold00443_4	(3555..4214)	1	Thorarchaeota B59_G1 (CRISPR), Chloroflexi B30_G2, B4_G108	Lysogenic	K02315	dnaC; DNA replication protein DnaC	219	SUPERFAMILY	SSF52540	NA	82	189	8.50E-17	TRUE	IPR027417	P-loop containing nucleoside triphosphate hydrolase	WP_098236958.1	42.7	124	68	2	79	201	121	242	3.30E-19	105.9	220	267	Firmicutes	Bacillus thuringiensis	1428	WP_098236958.1 ATP-binding protein [Bacillus thuringiensis]
Vedfolnir	Guay1_scaffold_2kb_Guay1_scaffold00443_4	(3555..4214)	1	Thorarchaeota B59_G1 (CRISPR), Chloroflexi B30_G2, B4_G109	Lysogenic	K02315	dnaC; DNA replication protein DnaC	219	SUPERFAMILY	SSF52540	NA	82	189	8.50E-17	TRUE	IPR027417	P-loop containing nucleoside triphosphate hydrolase	WP_098663997.1	43.5	124	67	2	79	201	121	242	3.30E-19	105.9	220	265	Firmicutes	Bacillus cereus	1396	WP_098663997.1 ATP-binding protein [Bacillus cereus]
Vedfolnir	Guay1_scaffold_2kb_Guay1_scaffold00443_4	(3555..4214)	1	Thorarchaeota B59_G1 (CRISPR), Chloroflexi B30_G2, B4_G110	Lysogenic	K02315	dnaC; DNA replication protein DnaC	219	SUPERFAMILY	SSF52540	NA	82	189	8.50E-17	TRUE	IPR027417	P-loop containing nucleoside triphosphate hydrolase	WP_163247612.1	43.5	124	67	2	79	201	121	242	3.30E-19	105.9	220	267	Firmicutes	Bacillus tropicus	2026188	WP_163247612.1 ATP-binding protein [Bacillus tropicus]
Vedfolnir	Guay1_scaffold_2kb_Guay1_scaffold00443_4	(3555..4214)	1	Thorarchaeota B59_G1 (CRISPR), Chloroflexi B30_G2, B4_G111	Lysogenic	K02315	dnaC; DNA replication protein DnaC	219	SUPERFAMILY	SSF52540	NA	82	189	8.50E-17	TRUE	IPR027417	P-loop containing nucleoside triphosphate hydrolase	WP_098770470.1	43.5	124	67	2	79	201	121	242	3.30E-19	105.9	220	267	Firmicutes	Bacillus cereus	1396	WP_098770470.1 ATP-binding protein [Bacillus cereus]
Vedfolnir	Guay1_scaffold_2kb_Guay1_scaffold00443_4	(3555..4214)	1	Thorarchaeota B59_G1 (CRISPR), Chloroflexi B30_G2, B4_G112	Lysogenic	K02315	dnaC; DNA replication protein DnaC	219	SUPERFAMILY	SSF52540	NA	82	189	8.50E-17	TRUE	IPR027417	P-loop containing nucleoside triphosphate hydrolase	WP_098368289.1	43.5	124	67	2	79	201	121	242	2.50E-19	106.3	220	267	Firmicutes	Bacillus thuringiensis	1428	WP_098368289.1 ATP-binding protein [Bacillus thuringiensis]
Vedfolnir	Guay1_scaffold_2kb_Guay1_scaffold00443_4	(3555..4214)	1	Thorarchaeota B59_G1 (CRISPR), Chloroflexi B30_G2, B4_G113	Lysogenic	K02315	dnaC; DNA replication protein DnaC	219	SUPERFAMILY	SSF52540	NA	82	189	8.50E-17	TRUE	IPR027417	P-loop containing nucleoside triphosphate hydrolase	WP_070183610.1	43.5	124	67	2	79	201	129	250	1.90E-19	106.7	220	275	Firmicutes	Bacillus thuringiensis	1428	WP_070183610.1 ATP-binding protein [Bacillus thuringiensis]
Vedfolnir	Guay1_scaffold_2kb_Guay1_scaffold00443_4	(3555..4214)	1	Thorarchaeota B59_G1 (CRISPR), Chloroflexi B30_G2, B4_G114	Lysogenic	K02315	dnaC; DNA replication protein DnaC	219	SUPERFAMILY	SSF52540	NA	82	189	8.50E-17	TRUE	IPR027417	P-loop containing nucleoside triphosphate hydrolase	EEM38245.1	43.5	124	67	2	79	201	79	200	1.90E-19	106.7	220	225	Firmicutes	Bacillus thuringiensis serovar sotto str. T04001	527026	EEM38245.1 Prophage LambdaBa02, DNA replication protein DnaC [Bacillus thuringiensis serovar sotto str. T04001]
Vedfolnir	Guay1_scaffold_2kb_Guay1_scaffold00443_4	(3555..4214)	1	Thorarchaeota B59_G1 (CRISPR), Chloroflexi B30_G2, B4_G115	Lysogenic	K02315	dnaC; DNA replication protein DnaC	219	SUPERFAMILY	SSF52540	NA	82	189	8.50E-17	TRUE	IPR027417	P-loop containing nucleoside triphosphate hydrolase	WP_131102245.1	43.5	124	67	2	79	201	121	242	1.50E-19	107.1	220	267	Firmicutes	Bacillus sp. SYJ	2529386	WP_131102245.1 ATP-binding protein [Bacillus sp. SYJ]
Vedfolnir	Guay1_scaffold_2kb_Guay1_scaffold00443_4	(3555..4214)	1	Thorarchaeota B59_G1 (CRISPR), Chloroflexi B30_G2, B4_G116	Lysogenic	K02315	dnaC; DNA replication protein DnaC	219	SUPERFAMILY	SSF52540	NA	82	189	8.50E-17	TRUE	IPR027417	P-loop containing nucleoside triphosphate hydrolase	WP_139226488.1	36.2	174	94	5	32	201	88	248	7.90E-21	111.3	220	275	Firmicutes	Bacillus sp. UNCCL81	1502755	WP_139226488.1 ATP-binding protein [Bacillus sp. UNCCL81]
Vedfolnir	Guay1_scaffold_2kb_Guay1_scaffold00443_4	(3555..4214)	1	Thorarchaeota B59_G1 (CRISPR), Chloroflexi B30_G2, B4_G117	Lysogenic	K02315	dnaC; DNA replication protein DnaC	219	SUPERFAMILY	SSF52540	NA	82	189	8.50E-17	TRUE	IPR027417	P-loop containing nucleoside triphosphate hydrolase	RLC82110.1	100	219	0	0	1	219	82	300	1.50E-125	459.1	220	300	Chloroflexi	Chloroflexi bacterium	2026724	RLC82110.1 hypothetical protein DRI81_00605 [Chloroflexi bacterium]
Vedfolnir	Guay1_scaffold_2kb_Guay1_scaffold00443_4	(3555..4214)	1	Thorarchaeota B59_G1 (CRISPR), Chloroflexi B30_G2, B4_G118	Lysogenic	K02315	dnaC; DNA replication protein DnaC	219	Pfam	PF01695	IstB-like ATP binding protein	82	192	2.40E-18	TRUE	IPR002611	IstB-like ATP-binding protein	WP_098236958.1	42.7	124	68	2	79	201	121	242	3.30E-19	105.9	220	267	Firmicutes	Bacillus thuringiensis	1428	WP_098236958.1 ATP-binding protein [Bacillus thuringiensis]
Vedfolnir	Guay1_scaffold_2kb_Guay1_scaffold00443_4	(3555..4214)	1	Thorarchaeota B59_G1 (CRISPR), Chloroflexi B30_G2, B4_G119	Lysogenic	K02315	dnaC; DNA replication protein DnaC	219	Pfam	PF01695	IstB-like ATP binding protein	82	192	2.40E-18	TRUE	IPR002611	IstB-like ATP-binding protein	WP_098663997.1	43.5	124	67	2	79	201	121	242	3.30E-19	105.9	220	265	Firmicutes	Bacillus cereus	1396	WP_098663997.1 ATP-binding protein [Bacillus cereus]
Vedfolnir	Guay1_scaffold_2kb_Guay1_scaffold00443_4	(3555..4214)	1	Thorarchaeota B59_G1 (CRISPR), Chloroflexi B30_G2, B4_G120	Lysogenic	K02315	dnaC; DNA replication protein DnaC	219	Pfam	PF01695	IstB-like ATP binding protein	82	192	2.40E-18	TRUE	IPR002611	IstB-like ATP-binding protein	WP_163247612.1	43.5	124	67	2	79	201	121	242	3.30E-19	105.9	220	267	Firmicutes	Bacillus tropicus	2026188	WP_163247612.1 ATP-binding protein [Bacillus tropicus]
Vedfolnir	Guay1_scaffold_2kb_Guay1_scaffold00443_4	(3555..4214)	1	Thorarchaeota B59_G1 (CRISPR), Chloroflexi B30_G2, B4_G121	Lysogenic	K02315	dnaC; DNA replication protein DnaC	219	Pfam	PF01695	IstB-like ATP binding protein	82	192	2.40E-18	TRUE	IPR002611	IstB-like ATP-binding protein	WP_098770470.1	43.5	124	67	2	79	201	121	242	3.30E-19	105.9	220	267	Firmicutes	Bacillus cereus	1396	WP_098770470.1 ATP-binding protein [Bacillus cereus]
Vedfolnir	Guay1_scaffold_2kb_Guay1_scaffold00443_4	(3555..4214)	1	Thorarchaeota B59_G1 (CRISPR), Chloroflexi B30_G2, B4_G122	Lysogenic	K02315	dnaC; DNA replication protein DnaC	219	Pfam	PF01695	IstB-like ATP binding protein	82	192	2.40E-18	TRUE	IPR002611	IstB-like ATP-binding protein	WP_098368289.1	43.5	124	67	2	79	201	121	242	2.50E-19	106.3	220	267	Firmicutes	Bacillus thuringiensis	1428	WP_098368289.1 ATP-binding protein [Bacillus thuringiensis]
Vedfolnir	Guay1_scaffold_2kb_Guay1_scaffold00443_4	(3555..4214)	1	Thorarchaeota B59_G1 (CRISPR), Chloroflexi B30_G2, B4_G123	Lysogenic	K02315	dnaC; DNA replication protein DnaC	219	Pfam	PF01695	IstB-like ATP binding protein	82	192	2.40E-18	TRUE	IPR002611	IstB-like ATP-binding protein	WP_070183610.1	43.5	124	67	2	79	201	129	250	1.90E-19	106.7	220	275	Firmicutes	Bacillus thuringiensis	1428	WP_070183610.1 ATP-binding protein [Bacillus thuringiensis]
Vedfolnir	Guay1_scaffold_2kb_Guay1_scaffold00443_4	(3555..4214)	1	Thorarchaeota B59_G1 (CRISPR), Chloroflexi B30_G2, B4_G124	Lysogenic	K02315	dnaC; DNA replication protein DnaC	219	Pfam	PF01695	IstB-like ATP binding protein	82	192	2.40E-18	TRUE	IPR002611	IstB-like ATP-binding protein	EEM38245.1	43.5	124	67	2	79	201	79	200	1.90E-19	106.7	220	225	Firmicutes	Bacillus thuringiensis serovar sotto str. T04001	527026	EEM38245.1 Prophage LambdaBa02, DNA replication protein DnaC [Bacillus thuringiensis serovar sotto str. T04001]
Vedfolnir	Guay1_scaffold_2kb_Guay1_scaffold00443_4	(3555..4214)	1	Thorarchaeota B59_G1 (CRISPR), Chloroflexi B30_G2, B4_G125	Lysogenic	K02315	dnaC; DNA replication protein DnaC	219	Pfam	PF01695	IstB-like ATP binding protein	82	192	2.40E-18	TRUE	IPR002611	IstB-like ATP-binding protein	WP_131102245.1	43.5	124	67	2	79	201	121	242	1.50E-19	107.1	220	267	Firmicutes	Bacillus sp. SYJ	2529386	WP_131102245.1 ATP-binding protein [Bacillus sp. SYJ]
Vedfolnir	Guay1_scaffold_2kb_Guay1_scaffold00443_4	(3555..4214)	1	Thorarchaeota B59_G1 (CRISPR), Chloroflexi B30_G2, B4_G126	Lysogenic	K02315	dnaC; DNA replication protein DnaC	219	Pfam	PF01695	IstB-like ATP binding protein	82	192	2.40E-18	TRUE	IPR002611	IstB-like ATP-binding protein	WP_139226488.1	36.2	174	94	5	32	201	88	248	7.90E-21	111.3	220	275	Firmicutes	Bacillus sp. UNCCL81	1502755	WP_139226488.1 ATP-binding protein [Bacillus sp. UNCCL81]
Vedfolnir	Guay1_scaffold_2kb_Guay1_scaffold00443_4	(3555..4214)	1	Thorarchaeota B59_G1 (CRISPR), Chloroflexi B30_G2, B4_G127	Lysogenic	K02315	dnaC; DNA replication protein DnaC	219	Pfam	PF01695	IstB-like ATP binding protein	82	192	2.40E-18	TRUE	IPR002611	IstB-like ATP-binding protein	RLC82110.1	100	219	0	0	1	219	82	300	1.50E-125	459.1	220	300	Chloroflexi	Chloroflexi bacterium	2026724	RLC82110.1 hypothetical protein DRI81_00605 [Chloroflexi bacterium]
Vedfolnir	Guay1_scaffold_2kb_Guay1_scaffold00443_4	(3555..4214)	1	Thorarchaeota B59_G1 (CRISPR), Chloroflexi B30_G2, B4_G128	Lysogenic	K02315	dnaC; DNA replication protein DnaC	219	CDD	cd00009	AAA	83	182	9.61E-07	TRUE			WP_098236958.1	42.7	124	68	2	79	201	121	242	3.30E-19	105.9	220	267	Firmicutes	Bacillus thuringiensis	1428	WP_098236958.1 ATP-binding protein [Bacillus thuringiensis]
Vedfolnir	Guay1_scaffold_2kb_Guay1_scaffold00443_4	(3555..4214)	1	Thorarchaeota B59_G1 (CRISPR), Chloroflexi B30_G2, B4_G129	Lysogenic	K02315	dnaC; DNA replication protein DnaC	219	CDD	cd00009	AAA	83	182	9.61E-07	TRUE			WP_098663997.1	43.5	124	67	2	79	201	121	242	3.30E-19	105.9	220	265	Firmicutes	Bacillus cereus	1396	WP_098663997.1 ATP-binding protein [Bacillus cereus]
Vedfolnir	Guay1_scaffold_2kb_Guay1_scaffold00443_4	(3555..4214)	1	Thorarchaeota B59_G1 (CRISPR), Chloroflexi B30_G2, B4_G130	Lysogenic	K02315	dnaC; DNA replication protein DnaC	219	CDD	cd00009	AAA	83	182	9.61E-07	TRUE			WP_163247612.1	43.5	124	67	2	79	201	121	242	3.30E-19	105.9	220	267	Firmicutes	Bacillus tropicus	2026188	WP_163247612.1 ATP-binding protein [Bacillus tropicus]
Vedfolnir	Guay1_scaffold_2kb_Guay1_scaffold00443_4	(3555..4214)	1	Thorarchaeota B59_G1 (CRISPR), Chloroflexi B30_G2, B4_G131	Lysogenic	K02315	dnaC; DNA replication protein DnaC	219	CDD	cd00009	AAA	83	182	9.61E-07	TRUE			WP_098770470.1	43.5	124	67	2	79	201	121	242	3.30E-19	105.9	220	267	Firmicutes	Bacillus cereus	1396	WP_098770470.1 ATP-binding protein [Bacillus cereus]
Vedfolnir	Guay1_scaffold_2kb_Guay1_scaffold00443_4	(3555..4214)	1	Thorarchaeota B59_G1 (CRISPR), Chloroflexi B30_G2, B4_G132	Lysogenic	K02315	dnaC; DNA replication protein DnaC	219	CDD	cd00009	AAA	83	182	9.61E-07	TRUE			WP_098368289.1	43.5	124	67	2	79	201	121	242	2.50E-19	106.3	220	267	Firmicutes	Bacillus thuringiensis	1428	WP_098368289.1 ATP-binding protein [Bacillus thuringiensis]
Vedfolnir	Guay1_scaffold_2kb_Guay1_scaffold00443_4	(3555..4214)	1	Thorarchaeota B59_G1 (CRISPR), Chloroflexi B30_G2, B4_G133	Lysogenic	K02315	dnaC; DNA replication protein DnaC	219	CDD	cd00009	AAA	83	182	9.61E-07	TRUE			WP_070183610.1	43.5	124	67	2	79	201	129	250	1.90E-19	106.7	220	275	Firmicutes	Bacillus thuringiensis	1428	WP_070183610.1 ATP-binding protein [Bacillus thuringiensis]
Vedfolnir	Guay1_scaffold_2kb_Guay1_scaffold00443_4	(3555..4214)	1	Thorarchaeota B59_G1 (CRISPR), Chloroflexi B30_G2, B4_G134	Lysogenic	K02315	dnaC; DNA replication protein DnaC	219	CDD	cd00009	AAA	83	182	9.61E-07	TRUE			EEM38245.1	43.5	124	67	2	79	201	79	200	1.90E-19	106.7	220	225	Firmicutes	Bacillus thuringiensis serovar sotto str. T04001	527026	EEM38245.1 Prophage LambdaBa02, DNA replication protein DnaC [Bacillus thuringiensis serovar sotto str. T04001]
Vedfolnir	Guay1_scaffold_2kb_Guay1_scaffold00443_4	(3555..4214)	1	Thorarchaeota B59_G1 (CRISPR), Chloroflexi B30_G2, B4_G135	Lysogenic	K02315	dnaC; DNA replication protein DnaC	219	CDD	cd00009	AAA	83	182	9.61E-07	TRUE			WP_131102245.1	43.5	124	67	2	79	201	121	242	1.50E-19	107.1	220	267	Firmicutes	Bacillus sp. SYJ	2529386	WP_131102245.1 ATP-binding protein [Bacillus sp. SYJ]
Vedfolnir	Guay1_scaffold_2kb_Guay1_scaffold00443_4	(3555..4214)	1	Thorarchaeota B59_G1 (CRISPR), Chloroflexi B30_G2, B4_G136	Lysogenic	K02315	dnaC; DNA replication protein DnaC	219	CDD	cd00009	AAA	83	182	9.61E-07	TRUE			WP_139226488.1	36.2	174	94	5	32	201	88	248	7.90E-21	111.3	220	275	Firmicutes	Bacillus sp. UNCCL81	1502755	WP_139226488.1 ATP-binding protein [Bacillus sp. UNCCL81]
Vedfolnir	Guay1_scaffold_2kb_Guay1_scaffold00443_4	(3555..4214)	1	Thorarchaeota B59_G1 (CRISPR), Chloroflexi B30_G2, B4_G137	Lysogenic	K02315	dnaC; DNA replication protein DnaC	219	CDD	cd00009	AAA	83	182	9.61E-07	TRUE			RLC82110.1	100	219	0	0	1	219	82	300	1.50E-125	459.1	220	300	Chloroflexi	Chloroflexi bacterium	2026724	RLC82110.1 hypothetical protein DRI81_00605 [Chloroflexi bacterium]
Vedfolnir	Guay1_scaffold_2kb_Guay1_scaffold00443_5	(4211..4429)	1	Thorarchaeota B59_G1 (CRISPR), Chloroflexi B30_G2, B4_G138	Lysogenic	None	hypothetical protein	NA	NA	NA	NA	NA	NA	NA	NA	NA	NA	RLC82111.1	100	72	0	0	1	72	1	72	4.30E-32	147.1	73	72	Chloroflexi	Chloroflexi bacterium	2026724	RLC82111.1 hypothetical protein DRI81_00610 [Chloroflexi bacterium]
Vedfolnir	Guay1_scaffold_2kb_Guay1_scaffold00443_6	(4439..5143)	1	Thorarchaeota B59_G1 (CRISPR), Chloroflexi B30_G2, B4_G139	Lysogenic	K03733	xerC; integrase/recombinase XerC	234	Gene3D	G3DSA:1.10.443.10	Integrase catalytic core	42	230	1.10E-37	TRUE	IPR013762	Integrase-like, catalytic domain superfamily	RPI95514.1	43.2	199	110	2	27	225	96	291	7.30E-33	151.4	235	311	Chloroflexi	Chloroflexi bacterium	2026724	RPI95514.1 site-specific integrase [Chloroflexi bacterium]
Vedfolnir	Guay1_scaffold_2kb_Guay1_scaffold00443_6	(4439..5143)	1	Thorarchaeota B59_G1 (CRISPR), Chloroflexi B30_G2, B4_G140	Lysogenic	K03733	xerC; integrase/recombinase XerC	234	Gene3D	G3DSA:1.10.443.10	Integrase catalytic core	42	230	1.10E-37	TRUE	IPR013762	Integrase-like, catalytic domain superfamily	NIV34990.1	42.6	197	109	3	28	220	102	298	6.60E-34	154.8	235	317	N/A	N/A		NIV34990.1 tyrosine-type recombinase/integrase [Anaerolineae bacterium]
Vedfolnir	Guay1_scaffold_2kb_Guay1_scaffold00443_6	(4439..5143)	1	Thorarchaeota B59_G1 (CRISPR), Chloroflexi B30_G2, B4_G141	Lysogenic	K03733	xerC; integrase/recombinase XerC	234	Gene3D	G3DSA:1.10.443.10	Integrase catalytic core	42	230	1.10E-37	TRUE	IPR013762	Integrase-like, catalytic domain superfamily	RLE03343.1	54.1	205	82	2	24	220	106	306	4.30E-49	205.3	235	307	Bacteroidetes	Bacteroidetes bacterium	1898104	RLE03343.1 hypothetical protein DRJ13_04605, partial [Bacteroidetes bacterium]
Vedfolnir	Guay1_scaffold_2kb_Guay1_scaffold00443_6	(4439..5143)	1	Thorarchaeota B59_G1 (CRISPR), Chloroflexi B30_G2, B4_G142	Lysogenic	K03733	xerC; integrase/recombinase XerC	234	Gene3D	G3DSA:1.10.443.10	Integrase catalytic core	42	230	1.10E-37	TRUE	IPR013762	Integrase-like, catalytic domain superfamily	NUQ86500.1	57.6	210	87	2	24	232	93	301	6.60E-58	234.6	235	304	N/A	N/A		NUQ86500.1 tyrosine-type recombinase/integrase [Anaerolineales bacterium]
Vedfolnir	Guay1_scaffold_2kb_Guay1_scaffold00443_6	(4439..5143)	1	Thorarchaeota B59_G1 (CRISPR), Chloroflexi B30_G2, B4_G143	Lysogenic	K03733	xerC; integrase/recombinase XerC	234	Gene3D	G3DSA:1.10.443.10	Integrase catalytic core	42	230	1.10E-37	TRUE	IPR013762	Integrase-like, catalytic domain superfamily	MBC8234706.1	57.8	211	87	2	24	233	95	304	1.00E-58	237.3	235	308	N/A	N/A		MBC8234706.1 site-specific integrase [bacterium]
Vedfolnir	Guay1_scaffold_2kb_Guay1_scaffold00443_6	(4439..5143)	1	Thorarchaeota B59_G1 (CRISPR), Chloroflexi B30_G2, B4_G144	Lysogenic	K03733	xerC; integrase/recombinase XerC	234	Gene3D	G3DSA:1.10.443.10	Integrase catalytic core	42	230	1.10E-37	TRUE	IPR013762	Integrase-like, catalytic domain superfamily	NWG33533.1	57.1	210	88	2	24	232	93	301	7.80E-59	237.7	235	304	N/A	N/A		NWG33533.1 tyrosine-type recombinase/integrase [Chloroflexi bacterium]
Vedfolnir	Guay1_scaffold_2kb_Guay1_scaffold00443_6	(4439..5143)	1	Thorarchaeota B59_G1 (CRISPR), Chloroflexi B30_G2, B4_G145	Lysogenic	K03733	xerC; integrase/recombinase XerC	234	Gene3D	G3DSA:1.10.443.10	Integrase catalytic core	42	230	1.10E-37	TRUE	IPR013762	Integrase-like, catalytic domain superfamily	MBD3373739.1	60.7	211	82	1	24	233	95	305	1.30E-61	246.9	235	306	N/A	N/A		MBD3373739.1 tyrosine-type recombinase/integrase [candidate division KSB1 bacterium]
Vedfolnir	Guay1_scaffold_2kb_Guay1_scaffold00443_6	(4439..5143)	1	Thorarchaeota B59_G1 (CRISPR), Chloroflexi B30_G2, B4_G146	Lysogenic	K03733	xerC; integrase/recombinase XerC	234	Gene3D	G3DSA:1.10.443.10	Integrase catalytic core	42	230	1.10E-37	TRUE	IPR013762	Integrase-like, catalytic domain superfamily	MBC6940578.1	59.7	211	84	1	24	233	114	324	1.50E-62	250	235	328	N/A	N/A		MBC6940578.1 site-specific integrase [Anaerolineae bacterium]
Vedfolnir	Guay1_scaffold_2kb_Guay1_scaffold00443_6	(4439..5143)	1	Thorarchaeota B59_G1 (CRISPR), Chloroflexi B30_G2, B4_G147	Lysogenic	K03733	xerC; integrase/recombinase XerC	234	Gene3D	G3DSA:1.10.443.10	Integrase catalytic core	42	230	1.10E-37	TRUE	IPR013762	Integrase-like, catalytic domain superfamily	RLC86410.1	90.4	240	17	1	1	234	63	302	6.10E-112	414.1	235	302	Chloroflexi	Chloroflexi bacterium	2026724	RLC86410.1 hypothetical protein DRJ03_08820 [Chloroflexi bacterium]
Vedfolnir	Guay1_scaffold_2kb_Guay1_scaffold00443_6	(4439..5143)	1	Thorarchaeota B59_G1 (CRISPR), Chloroflexi B30_G2, B4_G148	Lysogenic	K03733	xerC; integrase/recombinase XerC	234	Gene3D	G3DSA:1.10.443.10	Integrase catalytic core	42	230	1.10E-37	TRUE	IPR013762	Integrase-like, catalytic domain superfamily	RLC82112.1	100	234	0	0	1	234	1	234	8.70E-127	463.4	235	234	Chloroflexi	Chloroflexi bacterium	2026724	RLC82112.1 hypothetical protein DRI81_00615 [Chloroflexi bacterium]
Vedfolnir	Guay1_scaffold_2kb_Guay1_scaffold00443_6	(4439..5143)	1	Thorarchaeota B59_G1 (CRISPR), Chloroflexi B30_G2, B4_G149	Lysogenic	K03733	xerC; integrase/recombinase XerC	234	SUPERFAMILY	SSF56349	NA	45	223	3.53E-35	TRUE	IPR011010	DNA breaking-rejoining enzyme, catalytic core	RPI95514.1	43.2	199	110	2	27	225	96	291	7.30E-33	151.4	235	311	Chloroflexi	Chloroflexi bacterium	2026724	RPI95514.1 site-specific integrase [Chloroflexi bacterium]
Vedfolnir	Guay1_scaffold_2kb_Guay1_scaffold00443_6	(4439..5143)	1	Thorarchaeota B59_G1 (CRISPR), Chloroflexi B30_G2, B4_G150	Lysogenic	K03733	xerC; integrase/recombinase XerC	234	SUPERFAMILY	SSF56349	NA	45	223	3.53E-35	TRUE	IPR011010	DNA breaking-rejoining enzyme, catalytic core	NIV34990.1	42.6	197	109	3	28	220	102	298	6.60E-34	154.8	235	317	N/A	N/A		NIV34990.1 tyrosine-type recombinase/integrase [Anaerolineae bacterium]
Vedfolnir	Guay1_scaffold_2kb_Guay1_scaffold00443_6	(4439..5143)	1	Thorarchaeota B59_G1 (CRISPR), Chloroflexi B30_G2, B4_G151	Lysogenic	K03733	xerC; integrase/recombinase XerC	234	SUPERFAMILY	SSF56349	NA	45	223	3.53E-35	TRUE	IPR011010	DNA breaking-rejoining enzyme, catalytic core	RLE03343.1	54.1	205	82	2	24	220	106	306	4.30E-49	205.3	235	307	Bacteroidetes	Bacteroidetes bacterium	1898104	RLE03343.1 hypothetical protein DRJ13_04605, partial [Bacteroidetes bacterium]
Vedfolnir	Guay1_scaffold_2kb_Guay1_scaffold00443_6	(4439..5143)	1	Thorarchaeota B59_G1 (CRISPR), Chloroflexi B30_G2, B4_G152	Lysogenic	K03733	xerC; integrase/recombinase XerC	234	SUPERFAMILY	SSF56349	NA	45	223	3.53E-35	TRUE	IPR011010	DNA breaking-rejoining enzyme, catalytic core	NUQ86500.1	57.6	210	87	2	24	232	93	301	6.60E-58	234.6	235	304	N/A	N/A		NUQ86500.1 tyrosine-type recombinase/integrase [Anaerolineales bacterium]
Vedfolnir	Guay1_scaffold_2kb_Guay1_scaffold00443_6	(4439..5143)	1	Thorarchaeota B59_G1 (CRISPR), Chloroflexi B30_G2, B4_G153	Lysogenic	K03733	xerC; integrase/recombinase XerC	234	SUPERFAMILY	SSF56349	NA	45	223	3.53E-35	TRUE	IPR011010	DNA breaking-rejoining enzyme, catalytic core	MBC8234706.1	57.8	211	87	2	24	233	95	304	1.00E-58	237.3	235	308	N/A	N/A		MBC8234706.1 site-specific integrase [bacterium]
Vedfolnir	Guay1_scaffold_2kb_Guay1_scaffold00443_6	(4439..5143)	1	Thorarchaeota B59_G1 (CRISPR), Chloroflexi B30_G2, B4_G154	Lysogenic	K03733	xerC; integrase/recombinase XerC	234	SUPERFAMILY	SSF56349	NA	45	223	3.53E-35	TRUE	IPR011010	DNA breaking-rejoining enzyme, catalytic core	NWG33533.1	57.1	210	88	2	24	232	93	301	7.80E-59	237.7	235	304	N/A	N/A		NWG33533.1 tyrosine-type recombinase/integrase [Chloroflexi bacterium]
Vedfolnir	Guay1_scaffold_2kb_Guay1_scaffold00443_6	(4439..5143)	1	Thorarchaeota B59_G1 (CRISPR), Chloroflexi B30_G2, B4_G155	Lysogenic	K03733	xerC; integrase/recombinase XerC	234	SUPERFAMILY	SSF56349	NA	45	223	3.53E-35	TRUE	IPR011010	DNA breaking-rejoining enzyme, catalytic core	MBD3373739.1	60.7	211	82	1	24	233	95	305	1.30E-61	246.9	235	306	N/A	N/A		MBD3373739.1 tyrosine-type recombinase/integrase [candidate division KSB1 bacterium]
Vedfolnir	Guay1_scaffold_2kb_Guay1_scaffold00443_6	(4439..5143)	1	Thorarchaeota B59_G1 (CRISPR), Chloroflexi B30_G2, B4_G156	Lysogenic	K03733	xerC; integrase/recombinase XerC	234	SUPERFAMILY	SSF56349	NA	45	223	3.53E-35	TRUE	IPR011010	DNA breaking-rejoining enzyme, catalytic core	MBC6940578.1	59.7	211	84	1	24	233	114	324	1.50E-62	250	235	328	N/A	N/A		MBC6940578.1 site-specific integrase [Anaerolineae bacterium]
Vedfolnir	Guay1_scaffold_2kb_Guay1_scaffold00443_6	(4439..5143)	1	Thorarchaeota B59_G1 (CRISPR), Chloroflexi B30_G2, B4_G157	Lysogenic	K03733	xerC; integrase/recombinase XerC	234	SUPERFAMILY	SSF56349	NA	45	223	3.53E-35	TRUE	IPR011010	DNA breaking-rejoining enzyme, catalytic core	RLC86410.1	90.4	240	17	1	1	234	63	302	6.10E-112	414.1	235	302	Chloroflexi	Chloroflexi bacterium	2026724	RLC86410.1 hypothetical protein DRJ03_08820 [Chloroflexi bacterium]
Vedfolnir	Guay1_scaffold_2kb_Guay1_scaffold00443_6	(4439..5143)	1	Thorarchaeota B59_G1 (CRISPR), Chloroflexi B30_G2, B4_G158	Lysogenic	K03733	xerC; integrase/recombinase XerC	234	SUPERFAMILY	SSF56349	NA	45	223	3.53E-35	TRUE	IPR011010	DNA breaking-rejoining enzyme, catalytic core	RLC82112.1	100	234	0	0	1	234	1	234	8.70E-127	463.4	235	234	Chloroflexi	Chloroflexi bacterium	2026724	RLC82112.1 hypothetical protein DRI81_00615 [Chloroflexi bacterium]
Vedfolnir	Guay1_scaffold_2kb_Guay1_scaffold00443_6	(4439..5143)	1	Thorarchaeota B59_G1 (CRISPR), Chloroflexi B30_G2, B4_G159	Lysogenic	K03733	xerC; integrase/recombinase XerC	234	Pfam	PF00589	Phage integrase family	49	220	2.10E-24	TRUE	IPR002104	Integrase, catalytic domain	RPI95514.1	43.2	199	110	2	27	225	96	291	7.30E-33	151.4	235	311	Chloroflexi	Chloroflexi bacterium	2026724	RPI95514.1 site-specific integrase [Chloroflexi bacterium]
Vedfolnir	Guay1_scaffold_2kb_Guay1_scaffold00443_6	(4439..5143)	1	Thorarchaeota B59_G1 (CRISPR), Chloroflexi B30_G2, B4_G160	Lysogenic	K03733	xerC; integrase/recombinase XerC	234	Pfam	PF00589	Phage integrase family	49	220	2.10E-24	TRUE	IPR002104	Integrase, catalytic domain	NIV34990.1	42.6	197	109	3	28	220	102	298	6.60E-34	154.8	235	317	N/A	N/A		NIV34990.1 tyrosine-type recombinase/integrase [Anaerolineae bacterium]
Vedfolnir	Guay1_scaffold_2kb_Guay1_scaffold00443_6	(4439..5143)	1	Thorarchaeota B59_G1 (CRISPR), Chloroflexi B30_G2, B4_G161	Lysogenic	K03733	xerC; integrase/recombinase XerC	234	Pfam	PF00589	Phage integrase family	49	220	2.10E-24	TRUE	IPR002104	Integrase, catalytic domain	RLE03343.1	54.1	205	82	2	24	220	106	306	4.30E-49	205.3	235	307	Bacteroidetes	Bacteroidetes bacterium	1898104	RLE03343.1 hypothetical protein DRJ13_04605, partial [Bacteroidetes bacterium]
Vedfolnir	Guay1_scaffold_2kb_Guay1_scaffold00443_6	(4439..5143)	1	Thorarchaeota B59_G1 (CRISPR), Chloroflexi B30_G2, B4_G162	Lysogenic	K03733	xerC; integrase/recombinase XerC	234	Pfam	PF00589	Phage integrase family	49	220	2.10E-24	TRUE	IPR002104	Integrase, catalytic domain	NUQ86500.1	57.6	210	87	2	24	232	93	301	6.60E-58	234.6	235	304	N/A	N/A		NUQ86500.1 tyrosine-type recombinase/integrase [Anaerolineales bacterium]
Vedfolnir	Guay1_scaffold_2kb_Guay1_scaffold00443_6	(4439..5143)	1	Thorarchaeota B59_G1 (CRISPR), Chloroflexi B30_G2, B4_G163	Lysogenic	K03733	xerC; integrase/recombinase XerC	234	Pfam	PF00589	Phage integrase family	49	220	2.10E-24	TRUE	IPR002104	Integrase, catalytic domain	MBC8234706.1	57.8	211	87	2	24	233	95	304	1.00E-58	237.3	235	308	N/A	N/A		MBC8234706.1 site-specific integrase [bacterium]
Vedfolnir	Guay1_scaffold_2kb_Guay1_scaffold00443_6	(4439..5143)	1	Thorarchaeota B59_G1 (CRISPR), Chloroflexi B30_G2, B4_G164	Lysogenic	K03733	xerC; integrase/recombinase XerC	234	Pfam	PF00589	Phage integrase family	49	220	2.10E-24	TRUE	IPR002104	Integrase, catalytic domain	NWG33533.1	57.1	210	88	2	24	232	93	301	7.80E-59	237.7	235	304	N/A	N/A		NWG33533.1 tyrosine-type recombinase/integrase [Chloroflexi bacterium]
Vedfolnir	Guay1_scaffold_2kb_Guay1_scaffold00443_6	(4439..5143)	1	Thorarchaeota B59_G1 (CRISPR), Chloroflexi B30_G2, B4_G165	Lysogenic	K03733	xerC; integrase/recombinase XerC	234	Pfam	PF00589	Phage integrase family	49	220	2.10E-24	TRUE	IPR002104	Integrase, catalytic domain	MBD3373739.1	60.7	211	82	1	24	233	95	305	1.30E-61	246.9	235	306	N/A	N/A		MBD3373739.1 tyrosine-type recombinase/integrase [candidate division KSB1 bacterium]
Vedfolnir	Guay1_scaffold_2kb_Guay1_scaffold00443_6	(4439..5143)	1	Thorarchaeota B59_G1 (CRISPR), Chloroflexi B30_G2, B4_G166	Lysogenic	K03733	xerC; integrase/recombinase XerC	234	Pfam	PF00589	Phage integrase family	49	220	2.10E-24	TRUE	IPR002104	Integrase, catalytic domain	MBC6940578.1	59.7	211	84	1	24	233	114	324	1.50E-62	250	235	328	N/A	N/A		MBC6940578.1 site-specific integrase [Anaerolineae bacterium]
Vedfolnir	Guay1_scaffold_2kb_Guay1_scaffold00443_6	(4439..5143)	1	Thorarchaeota B59_G1 (CRISPR), Chloroflexi B30_G2, B4_G167	Lysogenic	K03733	xerC; integrase/recombinase XerC	234	Pfam	PF00589	Phage integrase family	49	220	2.10E-24	TRUE	IPR002104	Integrase, catalytic domain	RLC86410.1	90.4	240	17	1	1	234	63	302	6.10E-112	414.1	235	302	Chloroflexi	Chloroflexi bacterium	2026724	RLC86410.1 hypothetical protein DRJ03_08820 [Chloroflexi bacterium]
Vedfolnir	Guay1_scaffold_2kb_Guay1_scaffold00443_6	(4439..5143)	1	Thorarchaeota B59_G1 (CRISPR), Chloroflexi B30_G2, B4_G168	Lysogenic	K03733	xerC; integrase/recombinase XerC	234	Pfam	PF00589	Phage integrase family	49	220	2.10E-24	TRUE	IPR002104	Integrase, catalytic domain	RLC82112.1	100	234	0	0	1	234	1	234	8.70E-127	463.4	235	234	Chloroflexi	Chloroflexi bacterium	2026724	RLC82112.1 hypothetical protein DRI81_00615 [Chloroflexi bacterium]
Vedfolnir	Guay1_scaffold_2kb_Guay1_scaffold00443_6	(4439..5143)	1	Thorarchaeota B59_G1 (CRISPR), Chloroflexi B30_G2, B4_G169	Lysogenic	K03733	xerC; integrase/recombinase XerC	234	CDD	cd00397	DNA_BRE_C	54	218	8.16E-26	TRUE			RPI95514.1	43.2	199	110	2	27	225	96	291	7.30E-33	151.4	235	311	Chloroflexi	Chloroflexi bacterium	2026724	RPI95514.1 site-specific integrase [Chloroflexi bacterium]
Vedfolnir	Guay1_scaffold_2kb_Guay1_scaffold00443_6	(4439..5143)	1	Thorarchaeota B59_G1 (CRISPR), Chloroflexi B30_G2, B4_G170	Lysogenic	K03733	xerC; integrase/recombinase XerC	234	CDD	cd00397	DNA_BRE_C	54	218	8.16E-26	TRUE			NIV34990.1	42.6	197	109	3	28	220	102	298	6.60E-34	154.8	235	317	N/A	N/A		NIV34990.1 tyrosine-type recombinase/integrase [Anaerolineae bacterium]
Vedfolnir	Guay1_scaffold_2kb_Guay1_scaffold00443_6	(4439..5143)	1	Thorarchaeota B59_G1 (CRISPR), Chloroflexi B30_G2, B4_G171	Lysogenic	K03733	xerC; integrase/recombinase XerC	234	CDD	cd00397	DNA_BRE_C	54	218	8.16E-26	TRUE			RLE03343.1	54.1	205	82	2	24	220	106	306	4.30E-49	205.3	235	307	Bacteroidetes	Bacteroidetes bacterium	1898104	RLE03343.1 hypothetical protein DRJ13_04605, partial [Bacteroidetes bacterium]
Vedfolnir	Guay1_scaffold_2kb_Guay1_scaffold00443_6	(4439..5143)	1	Thorarchaeota B59_G1 (CRISPR), Chloroflexi B30_G2, B4_G172	Lysogenic	K03733	xerC; integrase/recombinase XerC	234	CDD	cd00397	DNA_BRE_C	54	218	8.16E-26	TRUE			NUQ86500.1	57.6	210	87	2	24	232	93	301	6.60E-58	234.6	235	304	N/A	N/A		NUQ86500.1 tyrosine-type recombinase/integrase [Anaerolineales bacterium]
Vedfolnir	Guay1_scaffold_2kb_Guay1_scaffold00443_6	(4439..5143)	1	Thorarchaeota B59_G1 (CRISPR), Chloroflexi B30_G2, B4_G173	Lysogenic	K03733	xerC; integrase/recombinase XerC	234	CDD	cd00397	DNA_BRE_C	54	218	8.16E-26	TRUE			MBC8234706.1	57.8	211	87	2	24	233	95	304	1.00E-58	237.3	235	308	N/A	N/A		MBC8234706.1 site-specific integrase [bacterium]
Vedfolnir	Guay1_scaffold_2kb_Guay1_scaffold00443_6	(4439..5143)	1	Thorarchaeota B59_G1 (CRISPR), Chloroflexi B30_G2, B4_G174	Lysogenic	K03733	xerC; integrase/recombinase XerC	234	CDD	cd00397	DNA_BRE_C	54	218	8.16E-26	TRUE			NWG33533.1	57.1	210	88	2	24	232	93	301	7.80E-59	237.7	235	304	N/A	N/A		NWG33533.1 tyrosine-type recombinase/integrase [Chloroflexi bacterium]
Vedfolnir	Guay1_scaffold_2kb_Guay1_scaffold00443_6	(4439..5143)	1	Thorarchaeota B59_G1 (CRISPR), Chloroflexi B30_G2, B4_G175	Lysogenic	K03733	xerC; integrase/recombinase XerC	234	CDD	cd00397	DNA_BRE_C	54	218	8.16E-26	TRUE			MBD3373739.1	60.7	211	82	1	24	233	95	305	1.30E-61	246.9	235	306	N/A	N/A		MBD3373739.1 tyrosine-type recombinase/integrase [candidate division KSB1 bacterium]
Vedfolnir	Guay1_scaffold_2kb_Guay1_scaffold00443_6	(4439..5143)	1	Thorarchaeota B59_G1 (CRISPR), Chloroflexi B30_G2, B4_G176	Lysogenic	K03733	xerC; integrase/recombinase XerC	234	CDD	cd00397	DNA_BRE_C	54	218	8.16E-26	TRUE			MBC6940578.1	59.7	211	84	1	24	233	114	324	1.50E-62	250	235	328	N/A	N/A		MBC6940578.1 site-specific integrase [Anaerolineae bacterium]
Vedfolnir	Guay1_scaffold_2kb_Guay1_scaffold00443_6	(4439..5143)	1	Thorarchaeota B59_G1 (CRISPR), Chloroflexi B30_G2, B4_G177	Lysogenic	K03733	xerC; integrase/recombinase XerC	234	CDD	cd00397	DNA_BRE_C	54	218	8.16E-26	TRUE			RLC86410.1	90.4	240	17	1	1	234	63	302	6.10E-112	414.1	235	302	Chloroflexi	Chloroflexi bacterium	2026724	RLC86410.1 hypothetical protein DRJ03_08820 [Chloroflexi bacterium]
Vedfolnir	Guay1_scaffold_2kb_Guay1_scaffold00443_6	(4439..5143)	1	Thorarchaeota B59_G1 (CRISPR), Chloroflexi B30_G2, B4_G178	Lysogenic	K03733	xerC; integrase/recombinase XerC	234	CDD	cd00397	DNA_BRE_C	54	218	8.16E-26	TRUE			RLC82112.1	100	234	0	0	1	234	1	234	8.70E-127	463.4	235	234	Chloroflexi	Chloroflexi bacterium	2026724	RLC82112.1 hypothetical protein DRI81_00615 [Chloroflexi bacterium]
Vedfolnir	Guay1_scaffold_2kb_Guay1_scaffold00443_7	(5161..5286)	1	Thorarchaeota B59_G1 (CRISPR), Chloroflexi B30_G2, B4_G179	Lysogenic	None	hypothetical protein	NA	NA	NA	NA	NA	NA	NA	NA	NA	NA	NA	NA	NA	NA	NA	NA	NA	NA	NA	NA	NA	NA	NA	NA	NA	NA	NA
Vedfolnir	Guay1_scaffold_2kb_Guay1_scaffold00443_8	(5283..5642)	1	Thorarchaeota B59_G1 (CRISPR), Chloroflexi B30_G2, B4_G180	Lysogenic	None	hypothetical protein	NA	NA	NA	NA	NA	NA	NA	NA	NA	NA	MXX34630.1	49.5	109	53	1	1	109	1	107	1.10E-19	106.7	120	122	N/A	N/A		MXX34630.1 hypothetical protein [Gemmatimonadetes bacterium]
Vedfolnir	Guay1_scaffold_2kb_Guay1_scaffold00443_8	(5283..5642)	1	Thorarchaeota B59_G1 (CRISPR), Chloroflexi B30_G2, B4_G181	Lysogenic	None	hypothetical protein	NA	NA	NA	NA	NA	NA	NA	NA	NA	NA	WP_058184389.1	43.4	129	62	3	1	118	1	129	8.10E-20	107.1	120	133	Cyanobacteria	Mastigocoleus testarum BC008;Mastigocoleus testarum	371196;996925	WP_058184389.1 hypothetical protein [Mastigocoleus testarum]
Vedfolnir	Guay1_scaffold_2kb_Guay1_scaffold00443_8	(5283..5642)	1	Thorarchaeota B59_G1 (CRISPR), Chloroflexi B30_G2, B4_G182	Lysogenic	None	hypothetical protein	NA	NA	NA	NA	NA	NA	NA	NA	NA	NA	NJM74690.1	45.9	109	59	0	1	109	1	109	8.10E-20	107.1	120	116	N/A	N/A		NJM74690.1 hypothetical protein [Acaryochloridaceae cyanobacterium RU_4_10]
Vedfolnir	Guay1_scaffold_2kb_Guay1_scaffold00443_8	(5283..5642)	1	Thorarchaeota B59_G1 (CRISPR), Chloroflexi B30_G2, B4_G183	Lysogenic	None	hypothetical protein	NA	NA	NA	NA	NA	NA	NA	NA	NA	NA	MBK04719.1	51.8	114	54	1	1	113	1	114	3.60E-20	108.2	120	114	N/A	N/A		MBK04719.1 hypothetical protein [Deltaproteobacteria bacterium]
Vedfolnir	Guay1_scaffold_2kb_Guay1_scaffold00443_8	(5283..5642)	1	Thorarchaeota B59_G1 (CRISPR), Chloroflexi B30_G2, B4_G184	Lysogenic	None	hypothetical protein	NA	NA	NA	NA	NA	NA	NA	NA	NA	NA	MBD3179007.1	45.9	109	59	0	2	110	3	111	3.30E-21	111.7	120	113	N/A	N/A		MBD3179007.1 hypothetical protein [bacterium]
Vedfolnir	Guay1_scaffold_2kb_Guay1_scaffold00443_8	(5283..5642)	1	Thorarchaeota B59_G1 (CRISPR), Chloroflexi B30_G2, B4_G185	Lysogenic	None	hypothetical protein	NA	NA	NA	NA	NA	NA	NA	NA	NA	NA	YP_006383699.1	52.3	111	53	0	2	112	3	113	7.80E-23	117.1	120	113	0	Salisaeta icosahedral phage 1	1183239	YP_006383699.1 hypothetical protein [Salisaeta icosahedral phage 1]
Vedfolnir	Guay1_scaffold_2kb_Guay1_scaffold00443_8	(5283..5642)	1	Thorarchaeota B59_G1 (CRISPR), Chloroflexi B30_G2, B4_G186	Lysogenic	None	hypothetical protein	NA	NA	NA	NA	NA	NA	NA	NA	NA	NA	OGO17256.1	51.4	109	53	0	2	110	3	111	7.80E-23	117.1	120	113	Chloroflexi	Chloroflexi bacterium RBG_16_48_8	1797641	OGO17256.1 hypothetical protein A2Z14_08650 [Chloroflexi bacterium RBG_16_48_8]
Vedfolnir	Guay1_scaffold_2kb_Guay1_scaffold00443_8	(5283..5642)	1	Thorarchaeota B59_G1 (CRISPR), Chloroflexi B30_G2, B4_G187	Lysogenic	None	hypothetical protein	NA	NA	NA	NA	NA	NA	NA	NA	NA	NA	WP_118839022.1	50	112	56	0	2	113	3	114	3.50E-23	118.2	120	120	Bacteroidetes	Salinibacter ruber	146919	WP_118839022.1 hypothetical protein [Salinibacter ruber]
Vedfolnir	Guay1_scaffold_2kb_Guay1_scaffold00443_8	(5283..5642)	1	Thorarchaeota B59_G1 (CRISPR), Chloroflexi B30_G2, B4_G188	Lysogenic	None	hypothetical protein	NA	NA	NA	NA	NA	NA	NA	NA	NA	NA	WP_098063426.1	50.9	112	55	0	2	113	3	114	2.10E-23	119	120	120	Bacteroidetes	Longimonas halophila	1469170	WP_098063426.1 hypothetical protein [Longimonas halophila]
Vedfolnir	Guay1_scaffold_2kb_Guay1_scaffold00443_8	(5283..5642)	1	Thorarchaeota B59_G1 (CRISPR), Chloroflexi B30_G2, B4_G189	Lysogenic	None	hypothetical protein	NA	NA	NA	NA	NA	NA	NA	NA	NA	NA	RLC82113.1	100	119	0	0	1	119	1	119	3.80E-62	247.7	120	119	Chloroflexi	Chloroflexi bacterium	2026724	RLC82113.1 hypothetical protein DRI81_00620 [Chloroflexi bacterium]
Vedfolnir	Guay1_scaffold_2kb_Guay1_scaffold00443_9	(5629..7353)	1	Thorarchaeota B59_G1 (CRISPR), Chloroflexi B30_G2, B4_G190	Lysogenic	K00590	E2.1.1.113; site-specific DNA-methyltransferase (cytosine-N4-specific) [EC:2.1.1.113]	574	SUPERFAMILY	SSF53335	NA	7	311	8.98E-23	TRUE	IPR029063	S-adenosyl-L-methionine-dependent methyltransferase	OHB80534.1	33.8	393	144	10	16	374	13	323	3.30E-42	183.7	575	383	Planctomycetes	Planctomycetes bacterium RBG_16_64_10	1801970	OHB80534.1 hypothetical protein A2W31_06765 [Planctomycetes bacterium RBG_16_64_10]
Vedfolnir	Guay1_scaffold_2kb_Guay1_scaffold00443_9	(5629..7353)	1	Thorarchaeota B59_G1 (CRISPR), Chloroflexi B30_G2, B4_G191	Lysogenic	K00590	E2.1.1.113; site-specific DNA-methyltransferase (cytosine-N4-specific) [EC:2.1.1.113]	574	SUPERFAMILY	SSF53335	NA	7	311	8.98E-23	TRUE	IPR029063	S-adenosyl-L-methionine-dependent methyltransferase	WP_152929710.1	39.8	309	102	7	21	313	1	241	2.50E-42	184.1	575	297	Proteobacteria	Serratia sp. 506_PEND	1572666	WP_152929710.1 site-specific DNA-methyltransferase [Serratia sp. 506_PEND]
Vedfolnir	Guay1_scaffold_2kb_Guay1_scaffold00443_9	(5629..7353)	1	Thorarchaeota B59_G1 (CRISPR), Chloroflexi B30_G2, B4_G192	Lysogenic	K00590	E2.1.1.113; site-specific DNA-methyltransferase (cytosine-N4-specific) [EC:2.1.1.113]	574	SUPERFAMILY	SSF53335	NA	7	311	8.98E-23	TRUE	IPR029063	S-adenosyl-L-methionine-dependent methyltransferase	WP_182025016.1	33.5	394	159	11	11	374	10	330	6.60E-43	186	575	341	N/A	N/A		WP_182025016.1 site-specific DNA-methyltransferase [Haloquadratum walsbyi]
Vedfolnir	Guay1_scaffold_2kb_Guay1_scaffold00443_9	(5629..7353)	1	Thorarchaeota B59_G1 (CRISPR), Chloroflexi B30_G2, B4_G193	Lysogenic	K00590	E2.1.1.113; site-specific DNA-methyltransferase (cytosine-N4-specific) [EC:2.1.1.113]	574	SUPERFAMILY	SSF53335	NA	7	311	8.98E-23	TRUE	IPR029063	S-adenosyl-L-methionine-dependent methyltransferase	MAG64474.1	34.5	394	160	10	10	374	30	354	3.90E-43	186.8	575	429	N/A	N/A		MAG64474.1 site-specific DNA-methyltransferase [Pseudomonadales bacterium]
Vedfolnir	Guay1_scaffold_2kb_Guay1_scaffold00443_9	(5629..7353)	1	Thorarchaeota B59_G1 (CRISPR), Chloroflexi B30_G2, B4_G194	Lysogenic	K00590	E2.1.1.113; site-specific DNA-methyltransferase (cytosine-N4-specific) [EC:2.1.1.113]	574	SUPERFAMILY	SSF53335	NA	7	311	8.98E-23	TRUE	IPR029063	S-adenosyl-L-methionine-dependent methyltransferase	BAF41976.1	34.3	382	159	7	18	377	14	325	1.00E-43	188.7	575	375	0	uncultured bacterium	77133	BAF41976.1 cellulase, partial [uncultured bacterium]
Vedfolnir	Guay1_scaffold_2kb_Guay1_scaffold00443_9	(5629..7353)	1	Thorarchaeota B59_G1 (CRISPR), Chloroflexi B30_G2, B4_G195	Lysogenic	K00590	E2.1.1.113; site-specific DNA-methyltransferase (cytosine-N4-specific) [EC:2.1.1.113]	574	SUPERFAMILY	SSF53335	NA	7	311	8.98E-23	TRUE	IPR029063	S-adenosyl-L-methionine-dependent methyltransferase	OQB29599.1	33.8	400	165	9	10	383	8	333	2.00E-44	191	575	372	Candidatus Hydrogenedentes	Candidatus Hydrogenedentes bacterium ADurb.Bin179	1852849	OQB29599.1 putative methyltransferase [Candidatus Hydrogenedentes bacterium ADurb.Bin179]
Vedfolnir	Guay1_scaffold_2kb_Guay1_scaffold00443_9	(5629..7353)	1	Thorarchaeota B59_G1 (CRISPR), Chloroflexi B30_G2, B4_G196	Lysogenic	K00590	E2.1.1.113; site-specific DNA-methyltransferase (cytosine-N4-specific) [EC:2.1.1.113]	574	SUPERFAMILY	SSF53335	NA	7	311	8.98E-23	TRUE	IPR029063	S-adenosyl-L-methionine-dependent methyltransferase	ADN37044.1	36.4	374	118	9	16	336	12	318	2.40E-45	194.1	575	419	Euryarchaeota	Methanolacinia petrolearia DSM 11571	679926	ADN37044.1 DNA methylase N-4/N-6 domain protein [Methanolacinia petrolearia DSM 11571]
Vedfolnir	Guay1_scaffold_2kb_Guay1_scaffold00443_9	(5629..7353)	1	Thorarchaeota B59_G1 (CRISPR), Chloroflexi B30_G2, B4_G197	Lysogenic	K00590	E2.1.1.113; site-specific DNA-methyltransferase (cytosine-N4-specific) [EC:2.1.1.113]	574	SUPERFAMILY	SSF53335	NA	7	311	8.98E-23	TRUE	IPR029063	S-adenosyl-L-methionine-dependent methyltransferase	OPZ47949.1	33.6	402	155	9	18	383	13	338	8.30E-46	195.7	575	386	Bacteroidetes	Bacteroidetes bacterium ADurb.BinA104	1852816	OPZ47949.1 putative methyltransferase [Bacteroidetes bacterium ADurb.BinA104]
Vedfolnir	Guay1_scaffold_2kb_Guay1_scaffold00443_9	(5629..7353)	1	Thorarchaeota B59_G1 (CRISPR), Chloroflexi B30_G2, B4_G198	Lysogenic	K00590	E2.1.1.113; site-specific DNA-methyltransferase (cytosine-N4-specific) [EC:2.1.1.113]	574	SUPERFAMILY	SSF53335	NA	7	311	8.98E-23	TRUE	IPR029063	S-adenosyl-L-methionine-dependent methyltransferase	RLC82114.1	100	574	0	0	1	574	1	574	0	1205.7	575	574	Chloroflexi	Chloroflexi bacterium	2026724	RLC82114.1 hypothetical protein DRI81_00625 [Chloroflexi bacterium]
Vedfolnir	Guay1_scaffold_2kb_Guay1_scaffold00443_9	(5629..7353)	1	Thorarchaeota B59_G1 (CRISPR), Chloroflexi B30_G2, B4_G199	Lysogenic	K00590	E2.1.1.113; site-specific DNA-methyltransferase (cytosine-N4-specific) [EC:2.1.1.113]	574	SUPERFAMILY	SSF53335	NA	7	311	8.98E-23	TRUE	IPR029063	S-adenosyl-L-methionine-dependent methyltransferase	RLC86412.1	99.8	574	1	0	1	574	1	574	0	1203.3	575	574	Chloroflexi	Chloroflexi bacterium	2026724	RLC86412.1 hypothetical protein DRJ03_08830 [Chloroflexi bacterium]
Vedfolnir	Guay1_scaffold_2kb_Guay1_scaffold00443_9	(5629..7353)	1	Thorarchaeota B59_G1 (CRISPR), Chloroflexi B30_G2, B4_G200	Lysogenic	K00590	E2.1.1.113; site-specific DNA-methyltransferase (cytosine-N4-specific) [EC:2.1.1.113]	574	PRINTS	PR00508	S21 class N4 adenine-specific DNA methyltransferase signature	25	39	3.10E-13	TRUE	IPR001091	Restriction/modification DNA-methylase	OHB80534.1	33.8	393	144	10	16	374	13	323	3.30E-42	183.7	575	383	Planctomycetes	Planctomycetes bacterium RBG_16_64_10	1801970	OHB80534.1 hypothetical protein A2W31_06765 [Planctomycetes bacterium RBG_16_64_10]
Vedfolnir	Guay1_scaffold_2kb_Guay1_scaffold00443_9	(5629..7353)	1	Thorarchaeota B59_G1 (CRISPR), Chloroflexi B30_G2, B4_G201	Lysogenic	K00590	E2.1.1.113; site-specific DNA-methyltransferase (cytosine-N4-specific) [EC:2.1.1.113]	574	PRINTS	PR00508	S21 class N4 adenine-specific DNA methyltransferase signature	25	39	3.10E-13	TRUE	IPR001091	Restriction/modification DNA-methylase	WP_152929710.1	39.8	309	102	7	21	313	1	241	2.50E-42	184.1	575	297	Proteobacteria	Serratia sp. 506_PEND	1572666	WP_152929710.1 site-specific DNA-methyltransferase [Serratia sp. 506_PEND]
Vedfolnir	Guay1_scaffold_2kb_Guay1_scaffold00443_9	(5629..7353)	1	Thorarchaeota B59_G1 (CRISPR), Chloroflexi B30_G2, B4_G202	Lysogenic	K00590	E2.1.1.113; site-specific DNA-methyltransferase (cytosine-N4-specific) [EC:2.1.1.113]	574	PRINTS	PR00508	S21 class N4 adenine-specific DNA methyltransferase signature	25	39	3.10E-13	TRUE	IPR001091	Restriction/modification DNA-methylase	WP_182025016.1	33.5	394	159	11	11	374	10	330	6.60E-43	186	575	341	N/A	N/A		WP_182025016.1 site-specific DNA-methyltransferase [Haloquadratum walsbyi]
Vedfolnir	Guay1_scaffold_2kb_Guay1_scaffold00443_9	(5629..7353)	1	Thorarchaeota B59_G1 (CRISPR), Chloroflexi B30_G2, B4_G203	Lysogenic	K00590	E2.1.1.113; site-specific DNA-methyltransferase (cytosine-N4-specific) [EC:2.1.1.113]	574	PRINTS	PR00508	S21 class N4 adenine-specific DNA methyltransferase signature	25	39	3.10E-13	TRUE	IPR001091	Restriction/modification DNA-methylase	MAG64474.1	34.5	394	160	10	10	374	30	354	3.90E-43	186.8	575	429	N/A	N/A		MAG64474.1 site-specific DNA-methyltransferase [Pseudomonadales bacterium]
Vedfolnir	Guay1_scaffold_2kb_Guay1_scaffold00443_9	(5629..7353)	1	Thorarchaeota B59_G1 (CRISPR), Chloroflexi B30_G2, B4_G204	Lysogenic	K00590	E2.1.1.113; site-specific DNA-methyltransferase (cytosine-N4-specific) [EC:2.1.1.113]	574	PRINTS	PR00508	S21 class N4 adenine-specific DNA methyltransferase signature	25	39	3.10E-13	TRUE	IPR001091	Restriction/modification DNA-methylase	BAF41976.1	34.3	382	159	7	18	377	14	325	1.00E-43	188.7	575	375	0	uncultured bacterium	77133	BAF41976.1 cellulase, partial [uncultured bacterium]
Vedfolnir	Guay1_scaffold_2kb_Guay1_scaffold00443_9	(5629..7353)	1	Thorarchaeota B59_G1 (CRISPR), Chloroflexi B30_G2, B4_G205	Lysogenic	K00590	E2.1.1.113; site-specific DNA-methyltransferase (cytosine-N4-specific) [EC:2.1.1.113]	574	PRINTS	PR00508	S21 class N4 adenine-specific DNA methyltransferase signature	25	39	3.10E-13	TRUE	IPR001091	Restriction/modification DNA-methylase	OQB29599.1	33.8	400	165	9	10	383	8	333	2.00E-44	191	575	372	Candidatus Hydrogenedentes	Candidatus Hydrogenedentes bacterium ADurb.Bin179	1852849	OQB29599.1 putative methyltransferase [Candidatus Hydrogenedentes bacterium ADurb.Bin179]
Vedfolnir	Guay1_scaffold_2kb_Guay1_scaffold00443_9	(5629..7353)	1	Thorarchaeota B59_G1 (CRISPR), Chloroflexi B30_G2, B4_G206	Lysogenic	K00590	E2.1.1.113; site-specific DNA-methyltransferase (cytosine-N4-specific) [EC:2.1.1.113]	574	PRINTS	PR00508	S21 class N4 adenine-specific DNA methyltransferase signature	25	39	3.10E-13	TRUE	IPR001091	Restriction/modification DNA-methylase	ADN37044.1	36.4	374	118	9	16	336	12	318	2.40E-45	194.1	575	419	Euryarchaeota	Methanolacinia petrolearia DSM 11571	679926	ADN37044.1 DNA methylase N-4/N-6 domain protein [Methanolacinia petrolearia DSM 11571]
Vedfolnir	Guay1_scaffold_2kb_Guay1_scaffold00443_9	(5629..7353)	1	Thorarchaeota B59_G1 (CRISPR), Chloroflexi B30_G2, B4_G207	Lysogenic	K00590	E2.1.1.113; site-specific DNA-methyltransferase (cytosine-N4-specific) [EC:2.1.1.113]	574	PRINTS	PR00508	S21 class N4 adenine-specific DNA methyltransferase signature	25	39	3.10E-13	TRUE	IPR001091	Restriction/modification DNA-methylase	OPZ47949.1	33.6	402	155	9	18	383	13	338	8.30E-46	195.7	575	386	Bacteroidetes	Bacteroidetes bacterium ADurb.BinA104	1852816	OPZ47949.1 putative methyltransferase [Bacteroidetes bacterium ADurb.BinA104]
Vedfolnir	Guay1_scaffold_2kb_Guay1_scaffold00443_9	(5629..7353)	1	Thorarchaeota B59_G1 (CRISPR), Chloroflexi B30_G2, B4_G208	Lysogenic	K00590	E2.1.1.113; site-specific DNA-methyltransferase (cytosine-N4-specific) [EC:2.1.1.113]	574	PRINTS	PR00508	S21 class N4 adenine-specific DNA methyltransferase signature	25	39	3.10E-13	TRUE	IPR001091	Restriction/modification DNA-methylase	RLC82114.1	100	574	0	0	1	574	1	574	0	1205.7	575	574	Chloroflexi	Chloroflexi bacterium	2026724	RLC82114.1 hypothetical protein DRI81_00625 [Chloroflexi bacterium]
Vedfolnir	Guay1_scaffold_2kb_Guay1_scaffold00443_9	(5629..7353)	1	Thorarchaeota B59_G1 (CRISPR), Chloroflexi B30_G2, B4_G209	Lysogenic	K00590	E2.1.1.113; site-specific DNA-methyltransferase (cytosine-N4-specific) [EC:2.1.1.113]	574	PRINTS	PR00508	S21 class N4 adenine-specific DNA methyltransferase signature	25	39	3.10E-13	TRUE	IPR001091	Restriction/modification DNA-methylase	RLC86412.1	99.8	574	1	0	1	574	1	574	0	1203.3	575	574	Chloroflexi	Chloroflexi bacterium	2026724	RLC86412.1 hypothetical protein DRJ03_08830 [Chloroflexi bacterium]
Vedfolnir	Guay1_scaffold_2kb_Guay1_scaffold00443_9	(5629..7353)	1	Thorarchaeota B59_G1 (CRISPR), Chloroflexi B30_G2, B4_G210	Lysogenic	K00590	E2.1.1.113; site-specific DNA-methyltransferase (cytosine-N4-specific) [EC:2.1.1.113]	574	Pfam	PF01555	DNA methylase	26	314	2.20E-27	TRUE	IPR002941	DNA methylase N-4/N-6	OHB80534.1	33.8	393	144	10	16	374	13	323	3.30E-42	183.7	575	383	Planctomycetes	Planctomycetes bacterium RBG_16_64_10	1801970	OHB80534.1 hypothetical protein A2W31_06765 [Planctomycetes bacterium RBG_16_64_10]
Vedfolnir	Guay1_scaffold_2kb_Guay1_scaffold00443_9	(5629..7353)	1	Thorarchaeota B59_G1 (CRISPR), Chloroflexi B30_G2, B4_G211	Lysogenic	K00590	E2.1.1.113; site-specific DNA-methyltransferase (cytosine-N4-specific) [EC:2.1.1.113]	574	Pfam	PF01555	DNA methylase	26	314	2.20E-27	TRUE	IPR002941	DNA methylase N-4/N-6	WP_152929710.1	39.8	309	102	7	21	313	1	241	2.50E-42	184.1	575	297	Proteobacteria	Serratia sp. 506_PEND	1572666	WP_152929710.1 site-specific DNA-methyltransferase [Serratia sp. 506_PEND]
Vedfolnir	Guay1_scaffold_2kb_Guay1_scaffold00443_9	(5629..7353)	1	Thorarchaeota B59_G1 (CRISPR), Chloroflexi B30_G2, B4_G212	Lysogenic	K00590	E2.1.1.113; site-specific DNA-methyltransferase (cytosine-N4-specific) [EC:2.1.1.113]	574	Pfam	PF01555	DNA methylase	26	314	2.20E-27	TRUE	IPR002941	DNA methylase N-4/N-6	WP_182025016.1	33.5	394	159	11	11	374	10	330	6.60E-43	186	575	341	N/A	N/A		WP_182025016.1 site-specific DNA-methyltransferase [Haloquadratum walsbyi]
Vedfolnir	Guay1_scaffold_2kb_Guay1_scaffold00443_9	(5629..7353)	1	Thorarchaeota B59_G1 (CRISPR), Chloroflexi B30_G2, B4_G213	Lysogenic	K00590	E2.1.1.113; site-specific DNA-methyltransferase (cytosine-N4-specific) [EC:2.1.1.113]	574	Pfam	PF01555	DNA methylase	26	314	2.20E-27	TRUE	IPR002941	DNA methylase N-4/N-6	MAG64474.1	34.5	394	160	10	10	374	30	354	3.90E-43	186.8	575	429	N/A	N/A		MAG64474.1 site-specific DNA-methyltransferase [Pseudomonadales bacterium]
Vedfolnir	Guay1_scaffold_2kb_Guay1_scaffold00443_9	(5629..7353)	1	Thorarchaeota B59_G1 (CRISPR), Chloroflexi B30_G2, B4_G214	Lysogenic	K00590	E2.1.1.113; site-specific DNA-methyltransferase (cytosine-N4-specific) [EC:2.1.1.113]	574	Pfam	PF01555	DNA methylase	26	314	2.20E-27	TRUE	IPR002941	DNA methylase N-4/N-6	BAF41976.1	34.3	382	159	7	18	377	14	325	1.00E-43	188.7	575	375	0	uncultured bacterium	77133	BAF41976.1 cellulase, partial [uncultured bacterium]
Vedfolnir	Guay1_scaffold_2kb_Guay1_scaffold00443_9	(5629..7353)	1	Thorarchaeota B59_G1 (CRISPR), Chloroflexi B30_G2, B4_G215	Lysogenic	K00590	E2.1.1.113; site-specific DNA-methyltransferase (cytosine-N4-specific) [EC:2.1.1.113]	574	Pfam	PF01555	DNA methylase	26	314	2.20E-27	TRUE	IPR002941	DNA methylase N-4/N-6	OQB29599.1	33.8	400	165	9	10	383	8	333	2.00E-44	191	575	372	Candidatus Hydrogenedentes	Candidatus Hydrogenedentes bacterium ADurb.Bin179	1852849	OQB29599.1 putative methyltransferase [Candidatus Hydrogenedentes bacterium ADurb.Bin179]
Vedfolnir	Guay1_scaffold_2kb_Guay1_scaffold00443_9	(5629..7353)	1	Thorarchaeota B59_G1 (CRISPR), Chloroflexi B30_G2, B4_G216	Lysogenic	K00590	E2.1.1.113; site-specific DNA-methyltransferase (cytosine-N4-specific) [EC:2.1.1.113]	574	Pfam	PF01555	DNA methylase	26	314	2.20E-27	TRUE	IPR002941	DNA methylase N-4/N-6	ADN37044.1	36.4	374	118	9	16	336	12	318	2.40E-45	194.1	575	419	Euryarchaeota	Methanolacinia petrolearia DSM 11571	679926	ADN37044.1 DNA methylase N-4/N-6 domain protein [Methanolacinia petrolearia DSM 11571]
Vedfolnir	Guay1_scaffold_2kb_Guay1_scaffold00443_9	(5629..7353)	1	Thorarchaeota B59_G1 (CRISPR), Chloroflexi B30_G2, B4_G217	Lysogenic	K00590	E2.1.1.113; site-specific DNA-methyltransferase (cytosine-N4-specific) [EC:2.1.1.113]	574	Pfam	PF01555	DNA methylase	26	314	2.20E-27	TRUE	IPR002941	DNA methylase N-4/N-6	OPZ47949.1	33.6	402	155	9	18	383	13	338	8.30E-46	195.7	575	386	Bacteroidetes	Bacteroidetes bacterium ADurb.BinA104	1852816	OPZ47949.1 putative methyltransferase [Bacteroidetes bacterium ADurb.BinA104]
Vedfolnir	Guay1_scaffold_2kb_Guay1_scaffold00443_9	(5629..7353)	1	Thorarchaeota B59_G1 (CRISPR), Chloroflexi B30_G2, B4_G218	Lysogenic	K00590	E2.1.1.113; site-specific DNA-methyltransferase (cytosine-N4-specific) [EC:2.1.1.113]	574	Pfam	PF01555	DNA methylase	26	314	2.20E-27	TRUE	IPR002941	DNA methylase N-4/N-6	RLC82114.1	100	574	0	0	1	574	1	574	0	1205.7	575	574	Chloroflexi	Chloroflexi bacterium	2026724	RLC82114.1 hypothetical protein DRI81_00625 [Chloroflexi bacterium]
Vedfolnir	Guay1_scaffold_2kb_Guay1_scaffold00443_9	(5629..7353)	1	Thorarchaeota B59_G1 (CRISPR), Chloroflexi B30_G2, B4_G219	Lysogenic	K00590	E2.1.1.113; site-specific DNA-methyltransferase (cytosine-N4-specific) [EC:2.1.1.113]	574	Pfam	PF01555	DNA methylase	26	314	2.20E-27	TRUE	IPR002941	DNA methylase N-4/N-6	RLC86412.1	99.8	574	1	0	1	574	1	574	0	1203.3	575	574	Chloroflexi	Chloroflexi bacterium	2026724	RLC86412.1 hypothetical protein DRJ03_08830 [Chloroflexi bacterium]
Vedfolnir	Guay1_scaffold_2kb_Guay1_scaffold00443_9	(5629..7353)	1	Thorarchaeota B59_G1 (CRISPR), Chloroflexi B30_G2, B4_G220	Lysogenic	K00590	E2.1.1.113; site-specific DNA-methyltransferase (cytosine-N4-specific) [EC:2.1.1.113]	574	PRINTS	PR00508	S21 class N4 adenine-specific DNA methyltransferase signature	64	84	3.10E-13	TRUE	IPR001091	Restriction/modification DNA-methylase	OHB80534.1	33.8	393	144	10	16	374	13	323	3.30E-42	183.7	575	383	Planctomycetes	Planctomycetes bacterium RBG_16_64_10	1801970	OHB80534.1 hypothetical protein A2W31_06765 [Planctomycetes bacterium RBG_16_64_10]
Vedfolnir	Guay1_scaffold_2kb_Guay1_scaffold00443_9	(5629..7353)	1	Thorarchaeota B59_G1 (CRISPR), Chloroflexi B30_G2, B4_G221	Lysogenic	K00590	E2.1.1.113; site-specific DNA-methyltransferase (cytosine-N4-specific) [EC:2.1.1.113]	574	PRINTS	PR00508	S21 class N4 adenine-specific DNA methyltransferase signature	64	84	3.10E-13	TRUE	IPR001091	Restriction/modification DNA-methylase	WP_152929710.1	39.8	309	102	7	21	313	1	241	2.50E-42	184.1	575	297	Proteobacteria	Serratia sp. 506_PEND	1572666	WP_152929710.1 site-specific DNA-methyltransferase [Serratia sp. 506_PEND]
Vedfolnir	Guay1_scaffold_2kb_Guay1_scaffold00443_9	(5629..7353)	1	Thorarchaeota B59_G1 (CRISPR), Chloroflexi B30_G2, B4_G222	Lysogenic	K00590	E2.1.1.113; site-specific DNA-methyltransferase (cytosine-N4-specific) [EC:2.1.1.113]	574	PRINTS	PR00508	S21 class N4 adenine-specific DNA methyltransferase signature	64	84	3.10E-13	TRUE	IPR001091	Restriction/modification DNA-methylase	WP_182025016.1	33.5	394	159	11	11	374	10	330	6.60E-43	186	575	341	N/A	N/A		WP_182025016.1 site-specific DNA-methyltransferase [Haloquadratum walsbyi]
Vedfolnir	Guay1_scaffold_2kb_Guay1_scaffold00443_9	(5629..7353)	1	Thorarchaeota B59_G1 (CRISPR), Chloroflexi B30_G2, B4_G223	Lysogenic	K00590	E2.1.1.113; site-specific DNA-methyltransferase (cytosine-N4-specific) [EC:2.1.1.113]	574	PRINTS	PR00508	S21 class N4 adenine-specific DNA methyltransferase signature	64	84	3.10E-13	TRUE	IPR001091	Restriction/modification DNA-methylase	MAG64474.1	34.5	394	160	10	10	374	30	354	3.90E-43	186.8	575	429	N/A	N/A		MAG64474.1 site-specific DNA-methyltransferase [Pseudomonadales bacterium]
Vedfolnir	Guay1_scaffold_2kb_Guay1_scaffold00443_9	(5629..7353)	1	Thorarchaeota B59_G1 (CRISPR), Chloroflexi B30_G2, B4_G224	Lysogenic	K00590	E2.1.1.113; site-specific DNA-methyltransferase (cytosine-N4-specific) [EC:2.1.1.113]	574	PRINTS	PR00508	S21 class N4 adenine-specific DNA methyltransferase signature	64	84	3.10E-13	TRUE	IPR001091	Restriction/modification DNA-methylase	BAF41976.1	34.3	382	159	7	18	377	14	325	1.00E-43	188.7	575	375	0	uncultured bacterium	77133	BAF41976.1 cellulase, partial [uncultured bacterium]
Vedfolnir	Guay1_scaffold_2kb_Guay1_scaffold00443_9	(5629..7353)	1	Thorarchaeota B59_G1 (CRISPR), Chloroflexi B30_G2, B4_G225	Lysogenic	K00590	E2.1.1.113; site-specific DNA-methyltransferase (cytosine-N4-specific) [EC:2.1.1.113]	574	PRINTS	PR00508	S21 class N4 adenine-specific DNA methyltransferase signature	64	84	3.10E-13	TRUE	IPR001091	Restriction/modification DNA-methylase	OQB29599.1	33.8	400	165	9	10	383	8	333	2.00E-44	191	575	372	Candidatus Hydrogenedentes	Candidatus Hydrogenedentes bacterium ADurb.Bin179	1852849	OQB29599.1 putative methyltransferase [Candidatus Hydrogenedentes bacterium ADurb.Bin179]
Vedfolnir	Guay1_scaffold_2kb_Guay1_scaffold00443_9	(5629..7353)	1	Thorarchaeota B59_G1 (CRISPR), Chloroflexi B30_G2, B4_G226	Lysogenic	K00590	E2.1.1.113; site-specific DNA-methyltransferase (cytosine-N4-specific) [EC:2.1.1.113]	574	PRINTS	PR00508	S21 class N4 adenine-specific DNA methyltransferase signature	64	84	3.10E-13	TRUE	IPR001091	Restriction/modification DNA-methylase	ADN37044.1	36.4	374	118	9	16	336	12	318	2.40E-45	194.1	575	419	Euryarchaeota	Methanolacinia petrolearia DSM 11571	679926	ADN37044.1 DNA methylase N-4/N-6 domain protein [Methanolacinia petrolearia DSM 11571]
Vedfolnir	Guay1_scaffold_2kb_Guay1_scaffold00443_9	(5629..7353)	1	Thorarchaeota B59_G1 (CRISPR), Chloroflexi B30_G2, B4_G227	Lysogenic	K00590	E2.1.1.113; site-specific DNA-methyltransferase (cytosine-N4-specific) [EC:2.1.1.113]	574	PRINTS	PR00508	S21 class N4 adenine-specific DNA methyltransferase signature	64	84	3.10E-13	TRUE	IPR001091	Restriction/modification DNA-methylase	OPZ47949.1	33.6	402	155	9	18	383	13	338	8.30E-46	195.7	575	386	Bacteroidetes	Bacteroidetes bacterium ADurb.BinA104	1852816	OPZ47949.1 putative methyltransferase [Bacteroidetes bacterium ADurb.BinA104]
Vedfolnir	Guay1_scaffold_2kb_Guay1_scaffold00443_9	(5629..7353)	1	Thorarchaeota B59_G1 (CRISPR), Chloroflexi B30_G2, B4_G228	Lysogenic	K00590	E2.1.1.113; site-specific DNA-methyltransferase (cytosine-N4-specific) [EC:2.1.1.113]	574	PRINTS	PR00508	S21 class N4 adenine-specific DNA methyltransferase signature	64	84	3.10E-13	TRUE	IPR001091	Restriction/modification DNA-methylase	RLC82114.1	100	574	0	0	1	574	1	574	0	1205.7	575	574	Chloroflexi	Chloroflexi bacterium	2026724	RLC82114.1 hypothetical protein DRI81_00625 [Chloroflexi bacterium]
Vedfolnir	Guay1_scaffold_2kb_Guay1_scaffold00443_9	(5629..7353)	1	Thorarchaeota B59_G1 (CRISPR), Chloroflexi B30_G2, B4_G229	Lysogenic	K00590	E2.1.1.113; site-specific DNA-methyltransferase (cytosine-N4-specific) [EC:2.1.1.113]	574	PRINTS	PR00508	S21 class N4 adenine-specific DNA methyltransferase signature	64	84	3.10E-13	TRUE	IPR001091	Restriction/modification DNA-methylase	RLC86412.1	99.8	574	1	0	1	574	1	574	0	1203.3	575	574	Chloroflexi	Chloroflexi bacterium	2026724	RLC86412.1 hypothetical protein DRJ03_08830 [Chloroflexi bacterium]
Vedfolnir	Guay1_scaffold_2kb_Guay1_scaffold00443_9	(5629..7353)	1	Thorarchaeota B59_G1 (CRISPR), Chloroflexi B30_G2, B4_G230	Lysogenic	K00590	E2.1.1.113; site-specific DNA-methyltransferase (cytosine-N4-specific) [EC:2.1.1.113]	574	PRINTS	PR00508	S21 class N4 adenine-specific DNA methyltransferase signature	292	309	3.10E-13	TRUE	IPR001091	Restriction/modification DNA-methylase	OHB80534.1	33.8	393	144	10	16	374	13	323	3.30E-42	183.7	575	383	Planctomycetes	Planctomycetes bacterium RBG_16_64_10	1801970	OHB80534.1 hypothetical protein A2W31_06765 [Planctomycetes bacterium RBG_16_64_10]
Vedfolnir	Guay1_scaffold_2kb_Guay1_scaffold00443_9	(5629..7353)	1	Thorarchaeota B59_G1 (CRISPR), Chloroflexi B30_G2, B4_G231	Lysogenic	K00590	E2.1.1.113; site-specific DNA-methyltransferase (cytosine-N4-specific) [EC:2.1.1.113]	574	PRINTS	PR00508	S21 class N4 adenine-specific DNA methyltransferase signature	292	309	3.10E-13	TRUE	IPR001091	Restriction/modification DNA-methylase	WP_152929710.1	39.8	309	102	7	21	313	1	241	2.50E-42	184.1	575	297	Proteobacteria	Serratia sp. 506_PEND	1572666	WP_152929710.1 site-specific DNA-methyltransferase [Serratia sp. 506_PEND]
Vedfolnir	Guay1_scaffold_2kb_Guay1_scaffold00443_9	(5629..7353)	1	Thorarchaeota B59_G1 (CRISPR), Chloroflexi B30_G2, B4_G232	Lysogenic	K00590	E2.1.1.113; site-specific DNA-methyltransferase (cytosine-N4-specific) [EC:2.1.1.113]	574	PRINTS	PR00508	S21 class N4 adenine-specific DNA methyltransferase signature	292	309	3.10E-13	TRUE	IPR001091	Restriction/modification DNA-methylase	WP_182025016.1	33.5	394	159	11	11	374	10	330	6.60E-43	186	575	341	N/A	N/A		WP_182025016.1 site-specific DNA-methyltransferase [Haloquadratum walsbyi]
Vedfolnir	Guay1_scaffold_2kb_Guay1_scaffold00443_9	(5629..7353)	1	Thorarchaeota B59_G1 (CRISPR), Chloroflexi B30_G2, B4_G233	Lysogenic	K00590	E2.1.1.113; site-specific DNA-methyltransferase (cytosine-N4-specific) [EC:2.1.1.113]	574	PRINTS	PR00508	S21 class N4 adenine-specific DNA methyltransferase signature	292	309	3.10E-13	TRUE	IPR001091	Restriction/modification DNA-methylase	MAG64474.1	34.5	394	160	10	10	374	30	354	3.90E-43	186.8	575	429	N/A	N/A		MAG64474.1 site-specific DNA-methyltransferase [Pseudomonadales bacterium]
Vedfolnir	Guay1_scaffold_2kb_Guay1_scaffold00443_9	(5629..7353)	1	Thorarchaeota B59_G1 (CRISPR), Chloroflexi B30_G2, B4_G234	Lysogenic	K00590	E2.1.1.113; site-specific DNA-methyltransferase (cytosine-N4-specific) [EC:2.1.1.113]	574	PRINTS	PR00508	S21 class N4 adenine-specific DNA methyltransferase signature	292	309	3.10E-13	TRUE	IPR001091	Restriction/modification DNA-methylase	BAF41976.1	34.3	382	159	7	18	377	14	325	1.00E-43	188.7	575	375	0	uncultured bacterium	77133	BAF41976.1 cellulase, partial [uncultured bacterium]
Vedfolnir	Guay1_scaffold_2kb_Guay1_scaffold00443_9	(5629..7353)	1	Thorarchaeota B59_G1 (CRISPR), Chloroflexi B30_G2, B4_G235	Lysogenic	K00590	E2.1.1.113; site-specific DNA-methyltransferase (cytosine-N4-specific) [EC:2.1.1.113]	574	PRINTS	PR00508	S21 class N4 adenine-specific DNA methyltransferase signature	292	309	3.10E-13	TRUE	IPR001091	Restriction/modification DNA-methylase	OQB29599.1	33.8	400	165	9	10	383	8	333	2.00E-44	191	575	372	Candidatus Hydrogenedentes	Candidatus Hydrogenedentes bacterium ADurb.Bin179	1852849	OQB29599.1 putative methyltransferase [Candidatus Hydrogenedentes bacterium ADurb.Bin179]
Vedfolnir	Guay1_scaffold_2kb_Guay1_scaffold00443_9	(5629..7353)	1	Thorarchaeota B59_G1 (CRISPR), Chloroflexi B30_G2, B4_G236	Lysogenic	K00590	E2.1.1.113; site-specific DNA-methyltransferase (cytosine-N4-specific) [EC:2.1.1.113]	574	PRINTS	PR00508	S21 class N4 adenine-specific DNA methyltransferase signature	292	309	3.10E-13	TRUE	IPR001091	Restriction/modification DNA-methylase	ADN37044.1	36.4	374	118	9	16	336	12	318	2.40E-45	194.1	575	419	Euryarchaeota	Methanolacinia petrolearia DSM 11571	679926	ADN37044.1 DNA methylase N-4/N-6 domain protein [Methanolacinia petrolearia DSM 11571]
Vedfolnir	Guay1_scaffold_2kb_Guay1_scaffold00443_9	(5629..7353)	1	Thorarchaeota B59_G1 (CRISPR), Chloroflexi B30_G2, B4_G237	Lysogenic	K00590	E2.1.1.113; site-specific DNA-methyltransferase (cytosine-N4-specific) [EC:2.1.1.113]	574	PRINTS	PR00508	S21 class N4 adenine-specific DNA methyltransferase signature	292	309	3.10E-13	TRUE	IPR001091	Restriction/modification DNA-methylase	OPZ47949.1	33.6	402	155	9	18	383	13	338	8.30E-46	195.7	575	386	Bacteroidetes	Bacteroidetes bacterium ADurb.BinA104	1852816	OPZ47949.1 putative methyltransferase [Bacteroidetes bacterium ADurb.BinA104]
Vedfolnir	Guay1_scaffold_2kb_Guay1_scaffold00443_9	(5629..7353)	1	Thorarchaeota B59_G1 (CRISPR), Chloroflexi B30_G2, B4_G238	Lysogenic	K00590	E2.1.1.113; site-specific DNA-methyltransferase (cytosine-N4-specific) [EC:2.1.1.113]	574	PRINTS	PR00508	S21 class N4 adenine-specific DNA methyltransferase signature	292	309	3.10E-13	TRUE	IPR001091	Restriction/modification DNA-methylase	RLC82114.1	100	574	0	0	1	574	1	574	0	1205.7	575	574	Chloroflexi	Chloroflexi bacterium	2026724	RLC82114.1 hypothetical protein DRI81_00625 [Chloroflexi bacterium]
Vedfolnir	Guay1_scaffold_2kb_Guay1_scaffold00443_9	(5629..7353)	1	Thorarchaeota B59_G1 (CRISPR), Chloroflexi B30_G2, B4_G239	Lysogenic	K00590	E2.1.1.113; site-specific DNA-methyltransferase (cytosine-N4-specific) [EC:2.1.1.113]	574	PRINTS	PR00508	S21 class N4 adenine-specific DNA methyltransferase signature	292	309	3.10E-13	TRUE	IPR001091	Restriction/modification DNA-methylase	RLC86412.1	99.8	574	1	0	1	574	1	574	0	1203.3	575	574	Chloroflexi	Chloroflexi bacterium	2026724	RLC86412.1 hypothetical protein DRJ03_08830 [Chloroflexi bacterium]
Vedfolnir	Guay1_scaffold_2kb_Guay1_scaffold00443_9	(5629..7353)	1	Thorarchaeota B59_G1 (CRISPR), Chloroflexi B30_G2, B4_G240	Lysogenic	K00590	E2.1.1.113; site-specific DNA-methyltransferase (cytosine-N4-specific) [EC:2.1.1.113]	574	Gene3D	G3DSA:3.40.50.150	Vaccinia Virus protein VP39	447	564	4.90E-08	TRUE			OHB80534.1	33.8	393	144	10	16	374	13	323	3.30E-42	183.7	575	383	Planctomycetes	Planctomycetes bacterium RBG_16_64_10	1801970	OHB80534.1 hypothetical protein A2W31_06765 [Planctomycetes bacterium RBG_16_64_10]
Vedfolnir	Guay1_scaffold_2kb_Guay1_scaffold00443_9	(5629..7353)	1	Thorarchaeota B59_G1 (CRISPR), Chloroflexi B30_G2, B4_G241	Lysogenic	K00590	E2.1.1.113; site-specific DNA-methyltransferase (cytosine-N4-specific) [EC:2.1.1.113]	574	Gene3D	G3DSA:3.40.50.150	Vaccinia Virus protein VP39	447	564	4.90E-08	TRUE			WP_152929710.1	39.8	309	102	7	21	313	1	241	2.50E-42	184.1	575	297	Proteobacteria	Serratia sp. 506_PEND	1572666	WP_152929710.1 site-specific DNA-methyltransferase [Serratia sp. 506_PEND]
Vedfolnir	Guay1_scaffold_2kb_Guay1_scaffold00443_9	(5629..7353)	1	Thorarchaeota B59_G1 (CRISPR), Chloroflexi B30_G2, B4_G242	Lysogenic	K00590	E2.1.1.113; site-specific DNA-methyltransferase (cytosine-N4-specific) [EC:2.1.1.113]	574	Gene3D	G3DSA:3.40.50.150	Vaccinia Virus protein VP39	447	564	4.90E-08	TRUE			WP_182025016.1	33.5	394	159	11	11	374	10	330	6.60E-43	186	575	341	N/A	N/A		WP_182025016.1 site-specific DNA-methyltransferase [Haloquadratum walsbyi]
Vedfolnir	Guay1_scaffold_2kb_Guay1_scaffold00443_9	(5629..7353)	1	Thorarchaeota B59_G1 (CRISPR), Chloroflexi B30_G2, B4_G243	Lysogenic	K00590	E2.1.1.113; site-specific DNA-methyltransferase (cytosine-N4-specific) [EC:2.1.1.113]	574	Gene3D	G3DSA:3.40.50.150	Vaccinia Virus protein VP39	447	564	4.90E-08	TRUE			MAG64474.1	34.5	394	160	10	10	374	30	354	3.90E-43	186.8	575	429	N/A	N/A		MAG64474.1 site-specific DNA-methyltransferase [Pseudomonadales bacterium]
Vedfolnir	Guay1_scaffold_2kb_Guay1_scaffold00443_9	(5629..7353)	1	Thorarchaeota B59_G1 (CRISPR), Chloroflexi B30_G2, B4_G244	Lysogenic	K00590	E2.1.1.113; site-specific DNA-methyltransferase (cytosine-N4-specific) [EC:2.1.1.113]	574	Gene3D	G3DSA:3.40.50.150	Vaccinia Virus protein VP39	447	564	4.90E-08	TRUE			BAF41976.1	34.3	382	159	7	18	377	14	325	1.00E-43	188.7	575	375	0	uncultured bacterium	77133	BAF41976.1 cellulase, partial [uncultured bacterium]
Vedfolnir	Guay1_scaffold_2kb_Guay1_scaffold00443_9	(5629..7353)	1	Thorarchaeota B59_G1 (CRISPR), Chloroflexi B30_G2, B4_G245	Lysogenic	K00590	E2.1.1.113; site-specific DNA-methyltransferase (cytosine-N4-specific) [EC:2.1.1.113]	574	Gene3D	G3DSA:3.40.50.150	Vaccinia Virus protein VP39	447	564	4.90E-08	TRUE			OQB29599.1	33.8	400	165	9	10	383	8	333	2.00E-44	191	575	372	Candidatus Hydrogenedentes	Candidatus Hydrogenedentes bacterium ADurb.Bin179	1852849	OQB29599.1 putative methyltransferase [Candidatus Hydrogenedentes bacterium ADurb.Bin179]
Vedfolnir	Guay1_scaffold_2kb_Guay1_scaffold00443_9	(5629..7353)	1	Thorarchaeota B59_G1 (CRISPR), Chloroflexi B30_G2, B4_G246	Lysogenic	K00590	E2.1.1.113; site-specific DNA-methyltransferase (cytosine-N4-specific) [EC:2.1.1.113]	574	Gene3D	G3DSA:3.40.50.150	Vaccinia Virus protein VP39	447	564	4.90E-08	TRUE			ADN37044.1	36.4	374	118	9	16	336	12	318	2.40E-45	194.1	575	419	Euryarchaeota	Methanolacinia petrolearia DSM 11571	679926	ADN37044.1 DNA methylase N-4/N-6 domain protein [Methanolacinia petrolearia DSM 11571]
Vedfolnir	Guay1_scaffold_2kb_Guay1_scaffold00443_9	(5629..7353)	1	Thorarchaeota B59_G1 (CRISPR), Chloroflexi B30_G2, B4_G247	Lysogenic	K00590	E2.1.1.113; site-specific DNA-methyltransferase (cytosine-N4-specific) [EC:2.1.1.113]	574	Gene3D	G3DSA:3.40.50.150	Vaccinia Virus protein VP39	447	564	4.90E-08	TRUE			OPZ47949.1	33.6	402	155	9	18	383	13	338	8.30E-46	195.7	575	386	Bacteroidetes	Bacteroidetes bacterium ADurb.BinA104	1852816	OPZ47949.1 putative methyltransferase [Bacteroidetes bacterium ADurb.BinA104]
Vedfolnir	Guay1_scaffold_2kb_Guay1_scaffold00443_9	(5629..7353)	1	Thorarchaeota B59_G1 (CRISPR), Chloroflexi B30_G2, B4_G248	Lysogenic	K00590	E2.1.1.113; site-specific DNA-methyltransferase (cytosine-N4-specific) [EC:2.1.1.113]	574	Gene3D	G3DSA:3.40.50.150	Vaccinia Virus protein VP39	447	564	4.90E-08	TRUE			RLC82114.1	100	574	0	0	1	574	1	574	0	1205.7	575	574	Chloroflexi	Chloroflexi bacterium	2026724	RLC82114.1 hypothetical protein DRI81_00625 [Chloroflexi bacterium]
Vedfolnir	Guay1_scaffold_2kb_Guay1_scaffold00443_9	(5629..7353)	1	Thorarchaeota B59_G1 (CRISPR), Chloroflexi B30_G2, B4_G249	Lysogenic	K00590	E2.1.1.113; site-specific DNA-methyltransferase (cytosine-N4-specific) [EC:2.1.1.113]	574	Gene3D	G3DSA:3.40.50.150	Vaccinia Virus protein VP39	447	564	4.90E-08	TRUE			RLC86412.1	99.8	574	1	0	1	574	1	574	0	1203.3	575	574	Chloroflexi	Chloroflexi bacterium	2026724	RLC86412.1 hypothetical protein DRJ03_08830 [Chloroflexi bacterium]
Vedfolnir	Guay1_scaffold_2kb_Guay1_scaffold00443_9	(5629..7353)	1	Thorarchaeota B59_G1 (CRISPR), Chloroflexi B30_G2, B4_G250	Lysogenic	K00590	E2.1.1.113; site-specific DNA-methyltransferase (cytosine-N4-specific) [EC:2.1.1.113]	574	SUPERFAMILY	SSF53335	NA	510	561	4.82E-09	TRUE	IPR029063	S-adenosyl-L-methionine-dependent methyltransferase	OHB80534.1	33.8	393	144	10	16	374	13	323	3.30E-42	183.7	575	383	Planctomycetes	Planctomycetes bacterium RBG_16_64_10	1801970	OHB80534.1 hypothetical protein A2W31_06765 [Planctomycetes bacterium RBG_16_64_10]
Vedfolnir	Guay1_scaffold_2kb_Guay1_scaffold00443_9	(5629..7353)	1	Thorarchaeota B59_G1 (CRISPR), Chloroflexi B30_G2, B4_G251	Lysogenic	K00590	E2.1.1.113; site-specific DNA-methyltransferase (cytosine-N4-specific) [EC:2.1.1.113]	574	SUPERFAMILY	SSF53335	NA	510	561	4.82E-09	TRUE	IPR029063	S-adenosyl-L-methionine-dependent methyltransferase	WP_152929710.1	39.8	309	102	7	21	313	1	241	2.50E-42	184.1	575	297	Proteobacteria	Serratia sp. 506_PEND	1572666	WP_152929710.1 site-specific DNA-methyltransferase [Serratia sp. 506_PEND]
Vedfolnir	Guay1_scaffold_2kb_Guay1_scaffold00443_9	(5629..7353)	1	Thorarchaeota B59_G1 (CRISPR), Chloroflexi B30_G2, B4_G252	Lysogenic	K00590	E2.1.1.113; site-specific DNA-methyltransferase (cytosine-N4-specific) [EC:2.1.1.113]	574	SUPERFAMILY	SSF53335	NA	510	561	4.82E-09	TRUE	IPR029063	S-adenosyl-L-methionine-dependent methyltransferase	WP_182025016.1	33.5	394	159	11	11	374	10	330	6.60E-43	186	575	341	N/A	N/A		WP_182025016.1 site-specific DNA-methyltransferase [Haloquadratum walsbyi]
Vedfolnir	Guay1_scaffold_2kb_Guay1_scaffold00443_9	(5629..7353)	1	Thorarchaeota B59_G1 (CRISPR), Chloroflexi B30_G2, B4_G253	Lysogenic	K00590	E2.1.1.113; site-specific DNA-methyltransferase (cytosine-N4-specific) [EC:2.1.1.113]	574	SUPERFAMILY	SSF53335	NA	510	561	4.82E-09	TRUE	IPR029063	S-adenosyl-L-methionine-dependent methyltransferase	MAG64474.1	34.5	394	160	10	10	374	30	354	3.90E-43	186.8	575	429	N/A	N/A		MAG64474.1 site-specific DNA-methyltransferase [Pseudomonadales bacterium]
Vedfolnir	Guay1_scaffold_2kb_Guay1_scaffold00443_9	(5629..7353)	1	Thorarchaeota B59_G1 (CRISPR), Chloroflexi B30_G2, B4_G254	Lysogenic	K00590	E2.1.1.113; site-specific DNA-methyltransferase (cytosine-N4-specific) [EC:2.1.1.113]	574	SUPERFAMILY	SSF53335	NA	510	561	4.82E-09	TRUE	IPR029063	S-adenosyl-L-methionine-dependent methyltransferase	BAF41976.1	34.3	382	159	7	18	377	14	325	1.00E-43	188.7	575	375	0	uncultured bacterium	77133	BAF41976.1 cellulase, partial [uncultured bacterium]
Vedfolnir	Guay1_scaffold_2kb_Guay1_scaffold00443_9	(5629..7353)	1	Thorarchaeota B59_G1 (CRISPR), Chloroflexi B30_G2, B4_G255	Lysogenic	K00590	E2.1.1.113; site-specific DNA-methyltransferase (cytosine-N4-specific) [EC:2.1.1.113]	574	SUPERFAMILY	SSF53335	NA	510	561	4.82E-09	TRUE	IPR029063	S-adenosyl-L-methionine-dependent methyltransferase	OQB29599.1	33.8	400	165	9	10	383	8	333	2.00E-44	191	575	372	Candidatus Hydrogenedentes	Candidatus Hydrogenedentes bacterium ADurb.Bin179	1852849	OQB29599.1 putative methyltransferase [Candidatus Hydrogenedentes bacterium ADurb.Bin179]
Vedfolnir	Guay1_scaffold_2kb_Guay1_scaffold00443_9	(5629..7353)	1	Thorarchaeota B59_G1 (CRISPR), Chloroflexi B30_G2, B4_G256	Lysogenic	K00590	E2.1.1.113; site-specific DNA-methyltransferase (cytosine-N4-specific) [EC:2.1.1.113]	574	SUPERFAMILY	SSF53335	NA	510	561	4.82E-09	TRUE	IPR029063	S-adenosyl-L-methionine-dependent methyltransferase	ADN37044.1	36.4	374	118	9	16	336	12	318	2.40E-45	194.1	575	419	Euryarchaeota	Methanolacinia petrolearia DSM 11571	679926	ADN37044.1 DNA methylase N-4/N-6 domain protein [Methanolacinia petrolearia DSM 11571]
Vedfolnir	Guay1_scaffold_2kb_Guay1_scaffold00443_9	(5629..7353)	1	Thorarchaeota B59_G1 (CRISPR), Chloroflexi B30_G2, B4_G257	Lysogenic	K00590	E2.1.1.113; site-specific DNA-methyltransferase (cytosine-N4-specific) [EC:2.1.1.113]	574	SUPERFAMILY	SSF53335	NA	510	561	4.82E-09	TRUE	IPR029063	S-adenosyl-L-methionine-dependent methyltransferase	OPZ47949.1	33.6	402	155	9	18	383	13	338	8.30E-46	195.7	575	386	Bacteroidetes	Bacteroidetes bacterium ADurb.BinA104	1852816	OPZ47949.1 putative methyltransferase [Bacteroidetes bacterium ADurb.BinA104]
Vedfolnir	Guay1_scaffold_2kb_Guay1_scaffold00443_9	(5629..7353)	1	Thorarchaeota B59_G1 (CRISPR), Chloroflexi B30_G2, B4_G258	Lysogenic	K00590	E2.1.1.113; site-specific DNA-methyltransferase (cytosine-N4-specific) [EC:2.1.1.113]	574	SUPERFAMILY	SSF53335	NA	510	561	4.82E-09	TRUE	IPR029063	S-adenosyl-L-methionine-dependent methyltransferase	RLC82114.1	100	574	0	0	1	574	1	574	0	1205.7	575	574	Chloroflexi	Chloroflexi bacterium	2026724	RLC82114.1 hypothetical protein DRI81_00625 [Chloroflexi bacterium]
Vedfolnir	Guay1_scaffold_2kb_Guay1_scaffold00443_9	(5629..7353)	1	Thorarchaeota B59_G1 (CRISPR), Chloroflexi B30_G2, B4_G259	Lysogenic	K00590	E2.1.1.113; site-specific DNA-methyltransferase (cytosine-N4-specific) [EC:2.1.1.113]	574	SUPERFAMILY	SSF53335	NA	510	561	4.82E-09	TRUE	IPR029063	S-adenosyl-L-methionine-dependent methyltransferase	RLC86412.1	99.8	574	1	0	1	574	1	574	0	1203.3	575	574	Chloroflexi	Chloroflexi bacterium	2026724	RLC86412.1 hypothetical protein DRJ03_08830 [Chloroflexi bacterium]
Vedfolnir	Guay1_scaffold_2kb_Guay1_scaffold00443_10	(7371..7616)	1	Thorarchaeota B59_G1 (CRISPR), Chloroflexi B30_G2, B4_G260	Lysogenic	None	hypothetical protein	NA	NA	NA	NA	NA	NA	NA	NA	NA	NA	RLC86413.1	98.8	81	1	0	1	81	1	81	9.10E-39	169.5	82	81	Chloroflexi	Chloroflexi bacterium	2026724	RLC86413.1 hypothetical protein DRJ03_08835 [Chloroflexi bacterium]
Vedfolnir	Guay1_scaffold_2kb_Guay1_scaffold00443_10	(7371..7616)	1	Thorarchaeota B59_G1 (CRISPR), Chloroflexi B30_G2, B4_G261	Lysogenic	None	hypothetical protein	NA	NA	NA	NA	NA	NA	NA	NA	NA	NA	RLC82115.1	100	81	0	0	1	81	1	81	4.10E-39	170.6	82	81	Chloroflexi	Chloroflexi bacterium	2026724	RLC82115.1 hypothetical protein DRI81_00630 [Chloroflexi bacterium]
Vedfolnir	Guay1_scaffold_2kb_Guay1_scaffold00443_11	(7726..7923)	1	Thorarchaeota B59_G1 (CRISPR), Chloroflexi B30_G2, B4_G262	Lysogenic	None	hypothetical protein	NA	NA	NA	NA	NA	NA	NA	NA	NA	NA	RLC82116.1	100	65	0	0	1	65	20	84	2.20E-27	131.3	66	84	Chloroflexi	Chloroflexi bacterium	2026724	RLC82116.1 hypothetical protein DRI81_00635 [Chloroflexi bacterium]
Vedfolnir	Guay1_scaffold_2kb_Guay1_scaffold00443_12	(7916..8611)	1	Thorarchaeota B59_G1 (CRISPR), Chloroflexi B30_G2, B4_G263	Lysogenic	None	hypothetical protein	NA	NA	NA	NA	NA	NA	NA	NA	NA	NA	MBA4421301.1	28.9	187	107	7	10	196	8	168	3.60E-08	69.3	232	191	N/A	N/A		MBA4421301.1 hypothetical protein [Anaerolinea sp.]
Vedfolnir	Guay1_scaffold_2kb_Guay1_scaffold00443_12	(7916..8611)	1	Thorarchaeota B59_G1 (CRISPR), Chloroflexi B30_G2, B4_G264	Lysogenic	None	hypothetical protein	NA	NA	NA	NA	NA	NA	NA	NA	NA	NA	MBA4420903.1	29	193	111	7	4	196	2	168	9.50E-09	71.2	232	191	N/A	N/A		MBA4420903.1 hypothetical protein [Anaerolinea sp.]
Vedfolnir	Guay1_scaffold_2kb_Guay1_scaffold00443_12	(7916..8611)	1	Thorarchaeota B59_G1 (CRISPR), Chloroflexi B30_G2, B4_G265	Lysogenic	None	hypothetical protein	NA	NA	NA	NA	NA	NA	NA	NA	NA	NA	PKN85432.1	40.6	106	56	3	5	110	6	104	3.00E-10	76.3	232	262	Chloroflexi	Chloroflexi bacterium HGW-Chloroflexi-8	2013731	PKN85432.1 hypothetical protein CVU46_11005 [Chloroflexi bacterium HGW-Chloroflexi-8]
Vedfolnir	Guay1_scaffold_2kb_Guay1_scaffold00443_12	(7916..8611)	1	Thorarchaeota B59_G1 (CRISPR), Chloroflexi B30_G2, B4_G266	Lysogenic	None	hypothetical protein	NA	NA	NA	NA	NA	NA	NA	NA	NA	NA	ABX04030.1	38.5	148	80	3	88	224	70	217	1.20E-14	90.9	232	239	Chloroflexi	Herpetosiphon aurantiacus DSM 785	316274	ABX04030.1 hypothetical protein Haur_1385 [Herpetosiphon aurantiacus DSM 785]
Vedfolnir	Guay1_scaffold_2kb_Guay1_scaffold00443_12	(7916..8611)	1	Thorarchaeota B59_G1 (CRISPR), Chloroflexi B30_G2, B4_G267	Lysogenic	None	hypothetical protein	NA	NA	NA	NA	NA	NA	NA	NA	NA	NA	ABX03974.1	40.3	149	78	4	87	224	66	214	1.20E-14	90.9	232	236	Chloroflexi	Herpetosiphon aurantiacus DSM 785	316274	ABX03974.1 hypothetical protein Haur_1329 [Herpetosiphon aurantiacus DSM 785]
Vedfolnir	Guay1_scaffold_2kb_Guay1_scaffold00443_12	(7916..8611)	1	Thorarchaeota B59_G1 (CRISPR), Chloroflexi B30_G2, B4_G268	Lysogenic	None	hypothetical protein	NA	NA	NA	NA	NA	NA	NA	NA	NA	NA	KAA3645321.1	39.6	187	88	5	16	201	3	165	8.90E-23	117.9	232	209	Chloroflexi	Chloroflexi bacterium	2026724	KAA3645321.1 hypothetical protein DWQ07_12700 [Chloroflexi bacterium]
Vedfolnir	Guay1_scaffold_2kb_Guay1_scaffold00443_12	(7916..8611)	1	Thorarchaeota B59_G1 (CRISPR), Chloroflexi B30_G2, B4_G269	Lysogenic	None	hypothetical protein	NA	NA	NA	NA	NA	NA	NA	NA	NA	NA	RLC82117.1	100	231	0	0	1	231	1	231	3.20E-129	471.5	232	231	Chloroflexi	Chloroflexi bacterium	2026724	RLC82117.1 hypothetical protein DRI81_00640 [Chloroflexi bacterium]
Vedfolnir	Guay1_scaffold_2kb_Guay1_scaffold00443_13	(8611..10104)	1	Thorarchaeota B59_G1 (CRISPR), Chloroflexi B30_G2, B4_G270	Lysogenic	VOG09810	sp|P17312|TERL_BPT4 Terminase, large subunit	497	Gene3D	G3DSA:3.40.50.300	P-loop containing nucleotide triphosphate hydrolases	1	211	1.40E-49	TRUE			MBC8248532.1	46.2	481	227	6	5	481	9	461	3.90E-108	402.5	498	488	N/A	N/A		MBC8248532.1 hypothetical protein [Anaerolineales bacterium]
Vedfolnir	Guay1_scaffold_2kb_Guay1_scaffold00443_13	(8611..10104)	1	Thorarchaeota B59_G1 (CRISPR), Chloroflexi B30_G2, B4_G271	Lysogenic	VOG09810	sp|P17312|TERL_BPT4 Terminase, large subunit	497	Gene3D	G3DSA:3.40.50.300	P-loop containing nucleotide triphosphate hydrolases	1	211	1.40E-49	TRUE			OQA46109.1	49.3	501	229	8	6	483	20	518	7.80E-117	431.4	498	539	Chloroflexi	Chloroflexi bacterium ADurb.Bin325	1852859	OQA46109.1 Terminase-like family protein [Chloroflexi bacterium ADurb.Bin325]
Vedfolnir	Guay1_scaffold_2kb_Guay1_scaffold00443_13	(8611..10104)	1	Thorarchaeota B59_G1 (CRISPR), Chloroflexi B30_G2, B4_G272	Lysogenic	VOG09810	sp|P17312|TERL_BPT4 Terminase, large subunit	497	Gene3D	G3DSA:3.40.50.300	P-loop containing nucleotide triphosphate hydrolases	1	211	1.40E-49	TRUE			TXH52990.1	48	479	222	4	5	479	17	472	1.00E-121	447.6	498	507	Proteobacteria	Desulfurellales bacterium	2482794	TXH52990.1 hypothetical protein E6Q97_14285 [Desulfurellales bacterium]
Vedfolnir	Guay1_scaffold_2kb_Guay1_scaffold00443_13	(8611..10104)	1	Thorarchaeota B59_G1 (CRISPR), Chloroflexi B30_G2, B4_G273	Lysogenic	VOG09810	sp|P17312|TERL_BPT4 Terminase, large subunit	497	Gene3D	G3DSA:3.40.50.300	P-loop containing nucleotide triphosphate hydrolases	1	211	1.40E-49	TRUE			HEE09557.1	50.6	480	215	4	7	477	7	473	3.50E-125	459.1	498	493	N/A	N/A		HEE09557.1 hypothetical protein [Gemmataceae bacterium]
Vedfolnir	Guay1_scaffold_2kb_Guay1_scaffold00443_13	(8611..10104)	1	Thorarchaeota B59_G1 (CRISPR), Chloroflexi B30_G2, B4_G274	Lysogenic	VOG09810	sp|P17312|TERL_BPT4 Terminase, large subunit	497	Gene3D	G3DSA:3.40.50.300	P-loop containing nucleotide triphosphate hydrolases	1	211	1.40E-49	TRUE			GBD35257.1	49.4	494	222	5	11	477	14	506	2.00E-125	459.9	498	528	0	bacterium HR36	2035431	GBD35257.1 hypothetical protein HRbin36_00365 [bacterium HR36]
Vedfolnir	Guay1_scaffold_2kb_Guay1_scaffold00443_13	(8611..10104)	1	Thorarchaeota B59_G1 (CRISPR), Chloroflexi B30_G2, B4_G275	Lysogenic	VOG09810	sp|P17312|TERL_BPT4 Terminase, large subunit	497	Gene3D	G3DSA:3.40.50.300	P-loop containing nucleotide triphosphate hydrolases	1	211	1.40E-49	TRUE			HEI43329.1	50.6	480	215	4	7	477	7	473	1.60E-125	460.3	498	493	N/A	N/A		HEI43329.1 hypothetical protein [Gemmataceae bacterium]
Vedfolnir	Guay1_scaffold_2kb_Guay1_scaffold00443_13	(8611..10104)	1	Thorarchaeota B59_G1 (CRISPR), Chloroflexi B30_G2, B4_G276	Lysogenic	VOG09810	sp|P17312|TERL_BPT4 Terminase, large subunit	497	Gene3D	G3DSA:3.40.50.300	P-loop containing nucleotide triphosphate hydrolases	1	211	1.40E-49	TRUE			TXH12670.1	51.6	473	205	3	6	477	9	458	3.60E-130	475.7	498	467	Proteobacteria	Hyphomicrobiaceae bacterium	2015799	TXH12670.1 hypothetical protein E6R03_12495 [Hyphomicrobiaceae bacterium]
Vedfolnir	Guay1_scaffold_2kb_Guay1_scaffold00443_13	(8611..10104)	1	Thorarchaeota B59_G1 (CRISPR), Chloroflexi B30_G2, B4_G277	Lysogenic	VOG09810	sp|P17312|TERL_BPT4 Terminase, large subunit	497	Gene3D	G3DSA:3.40.50.300	P-loop containing nucleotide triphosphate hydrolases	1	211	1.40E-49	TRUE			HFM61640.1	53.3	484	198	6	5	484	5	464	6.80E-137	498	498	468	N/A	N/A		HFM61640.1 hypothetical protein [Chloroflexi bacterium]
Vedfolnir	Guay1_scaffold_2kb_Guay1_scaffold00443_13	(8611..10104)	1	Thorarchaeota B59_G1 (CRISPR), Chloroflexi B30_G2, B4_G278	Lysogenic	VOG09810	sp|P17312|TERL_BPT4 Terminase, large subunit	497	Gene3D	G3DSA:3.40.50.300	P-loop containing nucleotide triphosphate hydrolases	1	211	1.40E-49	TRUE			NOZ27775.1	56	475	184	2	5	478	2	452	4.20E-147	531.9	498	472	N/A	N/A		NOZ27775.1 hypothetical protein [Chloroflexi bacterium]
Vedfolnir	Guay1_scaffold_2kb_Guay1_scaffold00443_13	(8611..10104)	1	Thorarchaeota B59_G1 (CRISPR), Chloroflexi B30_G2, B4_G279	Lysogenic	VOG09810	sp|P17312|TERL_BPT4 Terminase, large subunit	497	Gene3D	G3DSA:3.40.50.300	P-loop containing nucleotide triphosphate hydrolases	1	211	1.40E-49	TRUE			RLC82118.1	100	497	0	0	1	497	1	497	2.60E-290	1007.7	498	497	Chloroflexi	Chloroflexi bacterium	2026724	RLC82118.1 hypothetical protein DRI81_00645 [Chloroflexi bacterium]
Vedfolnir	Guay1_scaffold_2kb_Guay1_scaffold00443_13	(8611..10104)	1	Thorarchaeota B59_G1 (CRISPR), Chloroflexi B30_G2, B4_G280	Lysogenic	VOG09810	sp|P17312|TERL_BPT4 Terminase, large subunit	497	Gene3D	G3DSA:3.30.420.240	NA	302	482	2.10E-17	TRUE			MBC8248532.1	46.2	481	227	6	5	481	9	461	3.90E-108	402.5	498	488	N/A	N/A		MBC8248532.1 hypothetical protein [Anaerolineales bacterium]
Vedfolnir	Guay1_scaffold_2kb_Guay1_scaffold00443_13	(8611..10104)	1	Thorarchaeota B59_G1 (CRISPR), Chloroflexi B30_G2, B4_G281	Lysogenic	VOG09810	sp|P17312|TERL_BPT4 Terminase, large subunit	497	Gene3D	G3DSA:3.30.420.240	NA	302	482	2.10E-17	TRUE			OQA46109.1	49.3	501	229	8	6	483	20	518	7.80E-117	431.4	498	539	Chloroflexi	Chloroflexi bacterium ADurb.Bin325	1852859	OQA46109.1 Terminase-like family protein [Chloroflexi bacterium ADurb.Bin325]
Vedfolnir	Guay1_scaffold_2kb_Guay1_scaffold00443_13	(8611..10104)	1	Thorarchaeota B59_G1 (CRISPR), Chloroflexi B30_G2, B4_G282	Lysogenic	VOG09810	sp|P17312|TERL_BPT4 Terminase, large subunit	497	Gene3D	G3DSA:3.30.420.240	NA	302	482	2.10E-17	TRUE			TXH52990.1	48	479	222	4	5	479	17	472	1.00E-121	447.6	498	507	Proteobacteria	Desulfurellales bacterium	2482794	TXH52990.1 hypothetical protein E6Q97_14285 [Desulfurellales bacterium]
Vedfolnir	Guay1_scaffold_2kb_Guay1_scaffold00443_13	(8611..10104)	1	Thorarchaeota B59_G1 (CRISPR), Chloroflexi B30_G2, B4_G283	Lysogenic	VOG09810	sp|P17312|TERL_BPT4 Terminase, large subunit	497	Gene3D	G3DSA:3.30.420.240	NA	302	482	2.10E-17	TRUE			HEE09557.1	50.6	480	215	4	7	477	7	473	3.50E-125	459.1	498	493	N/A	N/A		HEE09557.1 hypothetical protein [Gemmataceae bacterium]
Vedfolnir	Guay1_scaffold_2kb_Guay1_scaffold00443_13	(8611..10104)	1	Thorarchaeota B59_G1 (CRISPR), Chloroflexi B30_G2, B4_G284	Lysogenic	VOG09810	sp|P17312|TERL_BPT4 Terminase, large subunit	497	Gene3D	G3DSA:3.30.420.240	NA	302	482	2.10E-17	TRUE			GBD35257.1	49.4	494	222	5	11	477	14	506	2.00E-125	459.9	498	528	0	bacterium HR36	2035431	GBD35257.1 hypothetical protein HRbin36_00365 [bacterium HR36]
Vedfolnir	Guay1_scaffold_2kb_Guay1_scaffold00443_13	(8611..10104)	1	Thorarchaeota B59_G1 (CRISPR), Chloroflexi B30_G2, B4_G285	Lysogenic	VOG09810	sp|P17312|TERL_BPT4 Terminase, large subunit	497	Gene3D	G3DSA:3.30.420.240	NA	302	482	2.10E-17	TRUE			HEI43329.1	50.6	480	215	4	7	477	7	473	1.60E-125	460.3	498	493	N/A	N/A		HEI43329.1 hypothetical protein [Gemmataceae bacterium]
Vedfolnir	Guay1_scaffold_2kb_Guay1_scaffold00443_13	(8611..10104)	1	Thorarchaeota B59_G1 (CRISPR), Chloroflexi B30_G2, B4_G286	Lysogenic	VOG09810	sp|P17312|TERL_BPT4 Terminase, large subunit	497	Gene3D	G3DSA:3.30.420.240	NA	302	482	2.10E-17	TRUE			TXH12670.1	51.6	473	205	3	6	477	9	458	3.60E-130	475.7	498	467	Proteobacteria	Hyphomicrobiaceae bacterium	2015799	TXH12670.1 hypothetical protein E6R03_12495 [Hyphomicrobiaceae bacterium]
Vedfolnir	Guay1_scaffold_2kb_Guay1_scaffold00443_13	(8611..10104)	1	Thorarchaeota B59_G1 (CRISPR), Chloroflexi B30_G2, B4_G287	Lysogenic	VOG09810	sp|P17312|TERL_BPT4 Terminase, large subunit	497	Gene3D	G3DSA:3.30.420.240	NA	302	482	2.10E-17	TRUE			HFM61640.1	53.3	484	198	6	5	484	5	464	6.80E-137	498	498	468	N/A	N/A		HFM61640.1 hypothetical protein [Chloroflexi bacterium]
Vedfolnir	Guay1_scaffold_2kb_Guay1_scaffold00443_13	(8611..10104)	1	Thorarchaeota B59_G1 (CRISPR), Chloroflexi B30_G2, B4_G288	Lysogenic	VOG09810	sp|P17312|TERL_BPT4 Terminase, large subunit	497	Gene3D	G3DSA:3.30.420.240	NA	302	482	2.10E-17	TRUE			NOZ27775.1	56	475	184	2	5	478	2	452	4.20E-147	531.9	498	472	N/A	N/A		NOZ27775.1 hypothetical protein [Chloroflexi bacterium]
Vedfolnir	Guay1_scaffold_2kb_Guay1_scaffold00443_13	(8611..10104)	1	Thorarchaeota B59_G1 (CRISPR), Chloroflexi B30_G2, B4_G289	Lysogenic	VOG09810	sp|P17312|TERL_BPT4 Terminase, large subunit	497	Gene3D	G3DSA:3.30.420.240	NA	302	482	2.10E-17	TRUE			RLC82118.1	100	497	0	0	1	497	1	497	2.60E-290	1007.7	498	497	Chloroflexi	Chloroflexi bacterium	2026724	RLC82118.1 hypothetical protein DRI81_00645 [Chloroflexi bacterium]
Vedfolnir	Guay1_scaffold_2kb_Guay1_scaffold00443_14	(10169..10615)	1	Thorarchaeota B59_G1 (CRISPR), Chloroflexi B30_G2, B4_G290	Lysogenic	None	hypothetical protein	NA	NA	NA	NA	NA	NA	NA	NA	NA	NA	RLC82119.1	100	148	0	0	1	148	1	148	1.60E-73	285.8	149	148	Chloroflexi	Chloroflexi bacterium	2026724	RLC82119.1 hypothetical protein DRI81_00650 [Chloroflexi bacterium]
Vedfolnir	Guay1_scaffold_2kb_Guay1_scaffold00443_15	(10622..11299)	1	Thorarchaeota B59_G1 (CRISPR), Chloroflexi B30_G2, B4_G291	Lysogenic	None	hypothetical protein	NA	NA	NA	NA	NA	NA	NA	NA	NA	NA	RLC82120.1	100	225	0	0	1	225	1	225	4.40E-128	467.6	226	225	Chloroflexi	Chloroflexi bacterium	2026724	RLC82120.1 hypothetical protein DRI81_00655 [Chloroflexi bacterium]
Vedfolnir	Guay1_scaffold_2kb_Guay1_scaffold00443_16	(11456..13162)	1	Thorarchaeota B59_G1 (CRISPR), Chloroflexi B30_G2, B4_G292	Lysogenic	VOG16436	REFSEQ hypothetical protein	NA	NA	NA	NA	NA	NA	NA	NA	NA	NA	MBC9783538.1	27.2	507	277	15	7	491	8	444	8.80E-32	149.1	569	505	N/A	N/A		MBC9783538.1 hypothetical protein [Heliobacterium chlorum]
Vedfolnir	Guay1_scaffold_2kb_Guay1_scaffold00443_16	(11456..13162)	1	Thorarchaeota B59_G1 (CRISPR), Chloroflexi B30_G2, B4_G293	Lysogenic	VOG16436	REFSEQ hypothetical protein	NA	NA	NA	NA	NA	NA	NA	NA	NA	NA	WP_148133334.1	27.2	463	267	11	34	486	34	436	3.00E-32	150.6	569	492	Firmicutes	Peptococcaceae bacterium DCMF	1761012	WP_148133334.1 phage portal protein [Peptococcaceae bacterium DCMF]
Vedfolnir	Guay1_scaffold_2kb_Guay1_scaffold00443_16	(11456..13162)	1	Thorarchaeota B59_G1 (CRISPR), Chloroflexi B30_G2, B4_G294	Lysogenic	VOG16436	REFSEQ hypothetical protein	NA	NA	NA	NA	NA	NA	NA	NA	NA	NA	WP_113674072.1	27.4	470	261	11	28	483	26	429	1.20E-36	165.2	569	502	Firmicutes	Vallitalea guaymasensis	1185412	WP_113674072.1 hypothetical protein [Vallitalea guaymasensis]
Vedfolnir	Guay1_scaffold_2kb_Guay1_scaffold00443_16	(11456..13162)	1	Thorarchaeota B59_G1 (CRISPR), Chloroflexi B30_G2, B4_G295	Lysogenic	VOG16436	REFSEQ hypothetical protein	NA	NA	NA	NA	NA	NA	NA	NA	NA	NA	WP_113676081.1	27.4	470	261	11	28	483	26	429	9.10E-37	165.6	569	502	Firmicutes	Vallitalea guaymasensis	1185412	WP_113676081.1 hypothetical protein [Vallitalea guaymasensis]
Vedfolnir	Guay1_scaffold_2kb_Guay1_scaffold00443_16	(11456..13162)	1	Thorarchaeota B59_G1 (CRISPR), Chloroflexi B30_G2, B4_G296	Lysogenic	VOG16436	REFSEQ hypothetical protein	NA	NA	NA	NA	NA	NA	NA	NA	NA	NA	HDO77807.1	28.1	502	297	10	24	521	19	460	3.20E-42	183.7	569	493	N/A	N/A		HDO77807.1 hypothetical protein [Actinobacteria bacterium]
Vedfolnir	Guay1_scaffold_2kb_Guay1_scaffold00443_16	(11456..13162)	1	Thorarchaeota B59_G1 (CRISPR), Chloroflexi B30_G2, B4_G297	Lysogenic	VOG16436	REFSEQ hypothetical protein	NA	NA	NA	NA	NA	NA	NA	NA	NA	NA	KAB2860256.1	32.9	502	268	11	24	510	18	465	8.80E-56	228.8	569	553	Chloroflexi	Anaerolineae bacterium	2052143	KAB2860256.1 hypothetical protein F9K46_10270, partial [Anaerolineae bacterium]
Vedfolnir	Guay1_scaffold_2kb_Guay1_scaffold00443_16	(11456..13162)	1	Thorarchaeota B59_G1 (CRISPR), Chloroflexi B30_G2, B4_G298	Lysogenic	VOG16436	REFSEQ hypothetical protein	NA	NA	NA	NA	NA	NA	NA	NA	NA	NA	NOG65663.1	31.8	551	297	13	17	542	7	503	2.50E-58	237.3	569	557	N/A	N/A		NOG65663.1 hypothetical protein [Chloroflexi bacterium]
Vedfolnir	Guay1_scaffold_2kb_Guay1_scaffold00443_16	(11456..13162)	1	Thorarchaeota B59_G1 (CRISPR), Chloroflexi B30_G2, B4_G299	Lysogenic	VOG16436	REFSEQ hypothetical protein	NA	NA	NA	NA	NA	NA	NA	NA	NA	NA	KAB2867533.1	33.8	536	281	13	14	530	4	484	8.50E-59	238.8	569	562	Chloroflexi	Anaerolineae bacterium	2052143	KAB2867533.1 hypothetical protein F9K46_00095 [Anaerolineae bacterium]
Vedfolnir	Guay1_scaffold_2kb_Guay1_scaffold00443_16	(11456..13162)	1	Thorarchaeota B59_G1 (CRISPR), Chloroflexi B30_G2, B4_G300	Lysogenic	VOG16436	REFSEQ hypothetical protein	NA	NA	NA	NA	NA	NA	NA	NA	NA	NA	RLC82121.1	100	568	0	0	1	568	1	568	0	1130.5	569	568	Chloroflexi	Chloroflexi bacterium	2026724	RLC82121.1 hypothetical protein DRI81_00660 [Chloroflexi bacterium]
Vedfolnir	Guay1_scaffold_2kb_Guay1_scaffold00443_16	(11456..13162)	1	Thorarchaeota B59_G1 (CRISPR), Chloroflexi B30_G2, B4_G301	Lysogenic	VOG16436	REFSEQ hypothetical protein	NA	NA	NA	NA	NA	NA	NA	NA	NA	NA	RLC86419.1	99.8	568	1	0	1	568	1	568	0	1129.4	569	568	Chloroflexi	Chloroflexi bacterium	2026724	RLC86419.1 hypothetical protein DRJ03_08865 [Chloroflexi bacterium]
Vedfolnir	Guay1_scaffold_2kb_Guay1_scaffold00443_17	(13159..14034)	1	Thorarchaeota B59_G1 (CRISPR), Chloroflexi B30_G2, B4_G302	Lysogenic	None	hypothetical protein	NA	NA	NA	NA	NA	NA	NA	NA	NA	NA	NMC34211.1	29.5	220	136	6	80	290	484	693	3.60E-13	86.3	292	701	N/A	N/A		NMC34211.1 hypothetical protein [Veillonellaceae bacterium]
Vedfolnir	Guay1_scaffold_2kb_Guay1_scaffold00443_17	(13159..14034)	1	Thorarchaeota B59_G1 (CRISPR), Chloroflexi B30_G2, B4_G303	Lysogenic	None	hypothetical protein	NA	NA	NA	NA	NA	NA	NA	NA	NA	NA	NRA49970.1	33.2	196	122	5	97	291	62	249	5.40E-17	99	292	250	N/A	N/A		NRA49970.1 hypothetical protein [Phaeodactylibacter sp.]
Vedfolnir	Guay1_scaffold_2kb_Guay1_scaffold00443_17	(13159..14034)	1	Thorarchaeota B59_G1 (CRISPR), Chloroflexi B30_G2, B4_G304	Lysogenic	None	hypothetical protein	NA	NA	NA	NA	NA	NA	NA	NA	NA	NA	RLC82122.1	100	291	0	0	1	291	1	291	2.40E-166	595.1	292	291	Chloroflexi	Chloroflexi bacterium	2026724	RLC82122.1 hypothetical protein DRI81_00665 [Chloroflexi bacterium]
Vedfolnir	Guay1_scaffold_2kb_Guay1_scaffold00443_18	(14031..14522)	1	Thorarchaeota B59_G1 (CRISPR), Chloroflexi B30_G2, B4_G305	Lysogenic	None	hypothetical protein	NA	NA	NA	NA	NA	NA	NA	NA	NA	NA	RLC82123.1	100	163	0	0	1	163	1	163	1.10E-67	266.5	164	163	Chloroflexi	Chloroflexi bacterium	2026724	RLC82123.1 hypothetical protein DRI81_00670 [Chloroflexi bacterium]
Vedfolnir	Guay1_scaffold_2kb_Guay1_scaffold00443_19	(14538..16430)	1	Thorarchaeota B59_G1 (CRISPR), Chloroflexi B30_G2, B4_G306	Lysogenic	None	hypothetical protein	NA	NA	NA	NA	NA	NA	NA	NA	NA	NA	TAM90626.1	28.7	282	149	13	107	362	341	596	1.10E-06	65.9	631	787	0	bacterium	1869227	TAM90626.1 hypothetical protein EPN42_05645 [bacterium]
Vedfolnir	Guay1_scaffold_2kb_Guay1_scaffold00443_19	(14538..16430)	1	Thorarchaeota B59_G1 (CRISPR), Chloroflexi B30_G2, B4_G307	Lysogenic	None	hypothetical protein	NA	NA	NA	NA	NA	NA	NA	NA	NA	NA	WP_113674076.1	36.2	149	72	6	181	321	106	239	1.80E-09	75.1	631	426	Firmicutes	Vallitalea guaymasensis	1185412	WP_113674076.1 hypothetical protein [Vallitalea guaymasensis]
Vedfolnir	Guay1_scaffold_2kb_Guay1_scaffold00443_19	(14538..16430)	1	Thorarchaeota B59_G1 (CRISPR), Chloroflexi B30_G2, B4_G308	Lysogenic	None	hypothetical protein	NA	NA	NA	NA	NA	NA	NA	NA	NA	NA	WP_148133336.1	29.9	291	157	12	194	468	171	430	2.10E-10	78.2	631	483	Firmicutes	Peptococcaceae bacterium DCMF	1761012	WP_148133336.1 hypothetical protein [Peptococcaceae bacterium DCMF]
Vedfolnir	Guay1_scaffold_2kb_Guay1_scaffold00443_19	(14538..16430)	1	Thorarchaeota B59_G1 (CRISPR), Chloroflexi B30_G2, B4_G309	Lysogenic	None	hypothetical protein	NA	NA	NA	NA	NA	NA	NA	NA	NA	NA	KAA3645328.1	33.1	260	146	9	80	321	60	309	6.00E-13	86.7	631	509	Chloroflexi	Chloroflexi bacterium	2026724	KAA3645328.1 hypothetical protein DWQ07_12735 [Chloroflexi bacterium]
Vedfolnir	Guay1_scaffold_2kb_Guay1_scaffold00443_19	(14538..16430)	1	Thorarchaeota B59_G1 (CRISPR), Chloroflexi B30_G2, B4_G310	Lysogenic	None	hypothetical protein	NA	NA	NA	NA	NA	NA	NA	NA	NA	NA	HDS30318.1	35.6	208	97	9	167	367	24	201	9.80E-16	95.9	631	326	N/A	N/A		HDS30318.1 hypothetical protein [Firmicutes bacterium]
Vedfolnir	Guay1_scaffold_2kb_Guay1_scaffold00443_19	(14538..16430)	1	Thorarchaeota B59_G1 (CRISPR), Chloroflexi B30_G2, B4_G311	Lysogenic	None	hypothetical protein	NA	NA	NA	NA	NA	NA	NA	NA	NA	NA	PZN43324.1	33.2	292	163	10	166	448	108	376	3.10E-17	100.9	631	467	Firmicutes	Firmicutes bacterium	1879010	PZN43324.1 hypothetical protein DIU70_03980 [Firmicutes bacterium]
Vedfolnir	Guay1_scaffold_2kb_Guay1_scaffold00443_19	(14538..16430)	1	Thorarchaeota B59_G1 (CRISPR), Chloroflexi B30_G2, B4_G312	Lysogenic	None	hypothetical protein	NA	NA	NA	NA	NA	NA	NA	NA	NA	NA	KAB2867535.1	38.5	192	107	4	139	327	106	289	4.70E-18	103.6	631	461	Chloroflexi	Anaerolineae bacterium	2052143	KAB2867535.1 hypothetical protein F9K46_00105 [Anaerolineae bacterium]
Vedfolnir	Guay1_scaffold_2kb_Guay1_scaffold00443_19	(14538..16430)	1	Thorarchaeota B59_G1 (CRISPR), Chloroflexi B30_G2, B4_G313	Lysogenic	None	hypothetical protein	NA	NA	NA	NA	NA	NA	NA	NA	NA	NA	NOG65661.1	45	171	82	5	181	348	113	274	1.60E-21	115.2	631	411	N/A	N/A		NOG65661.1 hypothetical protein [Chloroflexi bacterium]
Vedfolnir	Guay1_scaffold_2kb_Guay1_scaffold00443_19	(14538..16430)	1	Thorarchaeota B59_G1 (CRISPR), Chloroflexi B30_G2, B4_G314	Lysogenic	None	hypothetical protein	NA	NA	NA	NA	NA	NA	NA	NA	NA	NA	RLC82124.1	100	630	0	0	1	630	1	630	0	1186.8	631	630	Chloroflexi	Chloroflexi bacterium	2026724	RLC82124.1 hypothetical protein DRI81_00675 [Chloroflexi bacterium]
Vedfolnir	Guay1_scaffold_2kb_Guay1_scaffold00443_19	(14538..16430)	1	Thorarchaeota B59_G1 (CRISPR), Chloroflexi B30_G2, B4_G315	Lysogenic	None	hypothetical protein	NA	NA	NA	NA	NA	NA	NA	NA	NA	NA	RLC86422.1	99.8	630	0	1	1	630	1	629	0	1180.6	631	629	Chloroflexi	Chloroflexi bacterium	2026724	RLC86422.1 hypothetical protein DRJ03_08880 [Chloroflexi bacterium]
Vedfolnir	Guay1_scaffold_2kb_Guay1_scaffold00443_20	(16460..16840)	1	Thorarchaeota B59_G1 (CRISPR), Chloroflexi B30_G2, B4_G316	Lysogenic	None	hypothetical protein	126	Pfam	PF09956	Uncharacterized conserved protein (DUF2190)	10	117	8.10E-07	TRUE	IPR011231	Bacteriophage VT1-Sakai, H0018	WP_189794205.1	37.7	122	66	5	1	119	1	115	3.20E-06	62	127	117	N/A	N/A		WP_189794205.1 DUF2190 family protein [Streptosporangium violaceochromogenes]
Vedfolnir	Guay1_scaffold_2kb_Guay1_scaffold00443_20	(16460..16840)	1	Thorarchaeota B59_G1 (CRISPR), Chloroflexi B30_G2, B4_G317	Lysogenic	None	hypothetical protein	126	Pfam	PF09956	Uncharacterized conserved protein (DUF2190)	10	117	8.10E-07	TRUE	IPR011231	Bacteriophage VT1-Sakai, H0018	WP_075902406.1	39.3	122	64	5	1	119	1	115	1.90E-06	62.8	127	117	Actinobacteria	Actinomadura sp. CNU-125	1904961	WP_075902406.1 DUF2190 family protein [Actinomadura sp. CNU-125]
Vedfolnir	Guay1_scaffold_2kb_Guay1_scaffold00443_20	(16460..16840)	1	Thorarchaeota B59_G1 (CRISPR), Chloroflexi B30_G2, B4_G318	Lysogenic	None	hypothetical protein	126	Pfam	PF09956	Uncharacterized conserved protein (DUF2190)	10	117	8.10E-07	TRUE	IPR011231	Bacteriophage VT1-Sakai, H0018	MTI82590.1	40.8	120	62	4	1	119	1	112	5.80E-08	67.8	127	114	N/A	N/A		MTI82590.1 DUF2190 family protein [Firmicutes bacterium]
Vedfolnir	Guay1_scaffold_2kb_Guay1_scaffold00443_20	(16460..16840)	1	Thorarchaeota B59_G1 (CRISPR), Chloroflexi B30_G2, B4_G319	Lysogenic	None	hypothetical protein	126	Pfam	PF09956	Uncharacterized conserved protein (DUF2190)	10	117	8.10E-07	TRUE	IPR011231	Bacteriophage VT1-Sakai, H0018	RJP53619.1	43.2	118	58	5	1	115	1	112	4.70E-10	74.7	127	312	Chloroflexi	Anaerolineaceae bacterium	2024896	RJP53619.1 DUF2190 family protein [Anaerolineaceae bacterium]
Vedfolnir	Guay1_scaffold_2kb_Guay1_scaffold00443_20	(16460..16840)	1	Thorarchaeota B59_G1 (CRISPR), Chloroflexi B30_G2, B4_G320	Lysogenic	None	hypothetical protein	126	Pfam	PF09956	Uncharacterized conserved protein (DUF2190)	10	117	8.10E-07	TRUE	IPR011231	Bacteriophage VT1-Sakai, H0018	RLC86423.1	98.4	126	2	0	1	126	1	126	7.70E-61	243.4	127	126	Chloroflexi	Chloroflexi bacterium	2026724	RLC86423.1 hypothetical protein DRJ03_08885 [Chloroflexi bacterium]
Vedfolnir	Guay1_scaffold_2kb_Guay1_scaffold00443_20	(16460..16840)	1	Thorarchaeota B59_G1 (CRISPR), Chloroflexi B30_G2, B4_G321	Lysogenic	None	hypothetical protein	126	Pfam	PF09956	Uncharacterized conserved protein (DUF2190)	10	117	8.10E-07	TRUE	IPR011231	Bacteriophage VT1-Sakai, H0018	RLC82125.1	100	126	0	0	1	126	1	126	3.10E-62	248.1	127	126	Chloroflexi	Chloroflexi bacterium	2026724	RLC82125.1 hypothetical protein DRI81_00680 [Chloroflexi bacterium]
Vedfolnir	Guay1_scaffold_2kb_Guay1_scaffold00443_21	(16885..18069)	1	Thorarchaeota B59_G1 (CRISPR), Chloroflexi B30_G2, B4_G322	Lysogenic	VOG16435	REFSEQ hypothetical protein	NA	NA	NA	NA	NA	NA	NA	NA	NA	NA	WP_042426209.1	34.7	349	213	6	36	381	43	379	3.90E-47	199.5	395	404	Firmicutes	Geomicrobium sp. JCM 19039	1460636	WP_042426209.1 hypothetical protein [Geomicrobium sp. JCM 19039]
Vedfolnir	Guay1_scaffold_2kb_Guay1_scaffold00443_21	(16885..18069)	1	Thorarchaeota B59_G1 (CRISPR), Chloroflexi B30_G2, B4_G323	Lysogenic	VOG16435	REFSEQ hypothetical protein	NA	NA	NA	NA	NA	NA	NA	NA	NA	NA	RJP53620.1	35.6	382	229	11	1	376	1	371	1.00E-50	211.5	395	386	Chloroflexi	Anaerolineaceae bacterium	2024896	RJP53620.1 hypothetical protein C4583_04340 [Anaerolineaceae bacterium]
Vedfolnir	Guay1_scaffold_2kb_Guay1_scaffold00443_21	(16885..18069)	1	Thorarchaeota B59_G1 (CRISPR), Chloroflexi B30_G2, B4_G324	Lysogenic	VOG16435	REFSEQ hypothetical protein	NA	NA	NA	NA	NA	NA	NA	NA	NA	NA	KAA3644553.1	36.7	387	218	12	1	375	1	372	2.60E-51	213.4	395	388	Chloroflexi	Chloroflexi bacterium	2026724	KAA3644553.1 hypothetical protein DWQ07_14130 [Chloroflexi bacterium]
Vedfolnir	Guay1_scaffold_2kb_Guay1_scaffold00443_21	(16885..18069)	1	Thorarchaeota B59_G1 (CRISPR), Chloroflexi B30_G2, B4_G325	Lysogenic	VOG16435	REFSEQ hypothetical protein	NA	NA	NA	NA	NA	NA	NA	NA	NA	NA	WP_157346068.1	38	384	219	10	2	376	3	376	1.00E-55	228	395	389	Actinobacteria	unclassified Nocardioides	2615069	WP_157346068.1 MULTISPECIES: hypothetical protein [unclassified Nocardioides]
Vedfolnir	Guay1_scaffold_2kb_Guay1_scaffold00443_21	(16885..18069)	1	Thorarchaeota B59_G1 (CRISPR), Chloroflexi B30_G2, B4_G326	Lysogenic	VOG16435	REFSEQ hypothetical protein	NA	NA	NA	NA	NA	NA	NA	NA	NA	NA	WP_109507350.1	39.4	381	215	9	2	376	3	373	1.90E-57	233.8	395	386	Actinobacteria	Nocardioides speluncae	2670337	WP_109507350.1 hypothetical protein [Nocardioides speluncae]
Vedfolnir	Guay1_scaffold_2kb_Guay1_scaffold00443_21	(16885..18069)	1	Thorarchaeota B59_G1 (CRISPR), Chloroflexi B30_G2, B4_G327	Lysogenic	VOG16435	REFSEQ hypothetical protein	NA	NA	NA	NA	NA	NA	NA	NA	NA	NA	MTI82589.1	37.4	380	222	9	2	376	3	371	5.30E-60	242.3	395	386	N/A	N/A		MTI82589.1 hypothetical protein [Firmicutes bacterium]
Vedfolnir	Guay1_scaffold_2kb_Guay1_scaffold00443_21	(16885..18069)	1	Thorarchaeota B59_G1 (CRISPR), Chloroflexi B30_G2, B4_G328	Lysogenic	VOG16435	REFSEQ hypothetical protein	NA	NA	NA	NA	NA	NA	NA	NA	NA	NA	WP_166345096.1	40.5	378	211	8	2	376	3	369	1.80E-60	243.8	395	383	Actinobacteria	Phytoactinopolyspora sp. HAJB-30	2715536	WP_166345096.1 hypothetical protein [Phytoactinopolyspora sp. HAJB-30]
Vedfolnir	Guay1_scaffold_2kb_Guay1_scaffold00443_21	(16885..18069)	1	Thorarchaeota B59_G1 (CRISPR), Chloroflexi B30_G2, B4_G329	Lysogenic	VOG16435	REFSEQ hypothetical protein	NA	NA	NA	NA	NA	NA	NA	NA	NA	NA	KAB2865097.1	38.8	374	216	7	23	394	62	424	2.00E-62	250.4	395	424	Chloroflexi	Anaerolineae bacterium	2052143	KAB2865097.1 hypothetical protein F9K46_04070 [Anaerolineae bacterium]
Vedfolnir	Guay1_scaffold_2kb_Guay1_scaffold00443_21	(16885..18069)	1	Thorarchaeota B59_G1 (CRISPR), Chloroflexi B30_G2, B4_G330	Lysogenic	VOG16435	REFSEQ hypothetical protein	NA	NA	NA	NA	NA	NA	NA	NA	NA	NA	RLC86424.1	99.7	394	1	0	1	394	1	394	1.20E-229	805.8	395	394	Chloroflexi	Chloroflexi bacterium	2026724	RLC86424.1 hypothetical protein DRJ03_08890 [Chloroflexi bacterium]
Vedfolnir	Guay1_scaffold_2kb_Guay1_scaffold00443_21	(16885..18069)	1	Thorarchaeota B59_G1 (CRISPR), Chloroflexi B30_G2, B4_G331	Lysogenic	VOG16435	REFSEQ hypothetical protein	NA	NA	NA	NA	NA	NA	NA	NA	NA	NA	RLC82126.1	100	394	0	0	1	394	1	394	3.20E-230	807.7	395	394	Chloroflexi	Chloroflexi bacterium	2026724	RLC82126.1 hypothetical protein DRI81_00685 [Chloroflexi bacterium]
Vedfolnir	Guay1_scaffold_2kb_Guay1_scaffold00443_22	(18094..18699)	1	Thorarchaeota B59_G1 (CRISPR), Chloroflexi B30_G2, B4_G332	Lysogenic	None	hypothetical protein	NA	NA	NA	NA	NA	NA	NA	NA	NA	NA	NBD34397.1	33.3	198	103	8	1	196	1	171	3.50E-07	65.9	202	175	N/A	N/A		NBD34397.1 hypothetical protein [Chloroflexi bacterium]
Vedfolnir	Guay1_scaffold_2kb_Guay1_scaffold00443_22	(18094..18699)	1	Thorarchaeota B59_G1 (CRISPR), Chloroflexi B30_G2, B4_G333	Lysogenic	None	hypothetical protein	NA	NA	NA	NA	NA	NA	NA	NA	NA	NA	RLC86425.1	98	150	3	0	1	150	1	150	3.50E-76	295	202	150	Chloroflexi	Chloroflexi bacterium	2026724	RLC86425.1 hypothetical protein DRJ03_08895, partial [Chloroflexi bacterium]
Vedfolnir	Guay1_scaffold_2kb_Guay1_scaffold00443_22	(18094..18699)	1	Thorarchaeota B59_G1 (CRISPR), Chloroflexi B30_G2, B4_G334	Lysogenic	None	hypothetical protein	NA	NA	NA	NA	NA	NA	NA	NA	NA	NA	RLC82127.1	100	201	0	0	1	201	1	201	2.40E-109	405.2	202	201	Chloroflexi	Chloroflexi bacterium	2026724	RLC82127.1 hypothetical protein DRI81_00690 [Chloroflexi bacterium]
Vedfolnir	Guay1_scaffold_2kb_Guay1_scaffold00443_23	(18790..19128)	1	Thorarchaeota B59_G1 (CRISPR), Chloroflexi B30_G2, B4_G335	Lysogenic	None	hypothetical protein	112	SUPERFAMILY	SSF47789	C-terminal domain of RNA polymerase alpha subunit superfamily	5	61	1.02E-08	TRUE			RLC82128.1	100	112	0	0	1	112	1	112	4.90E-59	237.3	113	112	Chloroflexi	Chloroflexi bacterium	2026724	RLC82128.1 hypothetical protein DRI81_00695 [Chloroflexi bacterium]
Vedfolnir	Guay1_scaffold_2kb_Guay1_scaffold00443_23	(18790..19128)	1	Thorarchaeota B59_G1 (CRISPR), Chloroflexi B30_G2, B4_G336	Lysogenic	None	hypothetical protein	112	Gene3D	G3DSA:1.10.150.20	5' to 3' exonuclease	5	65	1.10E-09	TRUE			RLC82128.1	100	112	0	0	1	112	1	112	4.90E-59	237.3	113	112	Chloroflexi	Chloroflexi bacterium	2026724	RLC82128.1 hypothetical protein DRI81_00695 [Chloroflexi bacterium]
Vedfolnir	Guay1_scaffold_2kb_Guay1_scaffold00443_23	(18790..19128)	1	Thorarchaeota B59_G1 (CRISPR), Chloroflexi B30_G2, B4_G337	Lysogenic	None	hypothetical protein	112	Pfam	PF03118	Bacterial RNA polymerase, alpha chain C terminal domain	6	59	9.80E-07	TRUE	IPR011260	RNA polymerase, alpha subunit, C-terminal	RLC82128.1	100	112	0	0	1	112	1	112	4.90E-59	237.3	113	112	Chloroflexi	Chloroflexi bacterium	2026724	RLC82128.1 hypothetical protein DRI81_00695 [Chloroflexi bacterium]
Vedfolnir	Guay1_scaffold_2kb_Guay1_scaffold00443_24	(19134..19604)	1	Thorarchaeota B59_G1 (CRISPR), Chloroflexi B30_G2, B4_G338	Lysogenic	None	hypothetical protein	NA	NA	NA	NA	NA	NA	NA	NA	NA	NA	TPV96136.1	38.2	152	89	2	5	155	4	151	9.30E-16	94	157	153	Proteobacteria	Myxococcales bacterium FL481	1979545	TPV96136.1 hypothetical protein B7733_06195 [Myxococcales bacterium FL481]
Vedfolnir	Guay1_scaffold_2kb_Guay1_scaffold00443_24	(19134..19604)	1	Thorarchaeota B59_G1 (CRISPR), Chloroflexi B30_G2, B4_G339	Lysogenic	None	hypothetical protein	NA	NA	NA	NA	NA	NA	NA	NA	NA	NA	NIO11573.1	46.7	152	76	3	2	153	3	149	1.20E-28	136.7	157	150	N/A	N/A		NIO11573.1 hypothetical protein [Deltaproteobacteria bacterium]
Vedfolnir	Guay1_scaffold_2kb_Guay1_scaffold00443_24	(19134..19604)	1	Thorarchaeota B59_G1 (CRISPR), Chloroflexi B30_G2, B4_G340	Lysogenic	None	hypothetical protein	NA	NA	NA	NA	NA	NA	NA	NA	NA	NA	NIM55153.1	51.6	128	62	0	26	153	12	139	2.70E-31	145.6	157	143	N/A	N/A		NIM55153.1 hypothetical protein [Pseudomonas stutzeri]
Vedfolnir	Guay1_scaffold_2kb_Guay1_scaffold00443_24	(19134..19604)	1	Thorarchaeota B59_G1 (CRISPR), Chloroflexi B30_G2, B4_G341	Lysogenic	None	hypothetical protein	NA	NA	NA	NA	NA	NA	NA	NA	NA	NA	MBR50223.1	46.6	161	78	3	2	154	3	163	9.90E-34	153.7	157	163	N/A	N/A		MBR50223.1 hypothetical protein [Euryarchaeota archaeon]
Vedfolnir	Guay1_scaffold_2kb_Guay1_scaffold00443_24	(19134..19604)	1	Thorarchaeota B59_G1 (CRISPR), Chloroflexi B30_G2, B4_G342	Lysogenic	None	hypothetical protein	NA	NA	NA	NA	NA	NA	NA	NA	NA	NA	RIK31151.1	51.6	155	72	1	1	155	1	152	1.90E-40	176	157	152	Chloroflexi	Anaerolineae bacterium	2052143	RIK31151.1 hypothetical protein DCC56_02890 [Anaerolineae bacterium]
Vedfolnir	Guay1_scaffold_2kb_Guay1_scaffold00443_24	(19134..19604)	1	Thorarchaeota B59_G1 (CRISPR), Chloroflexi B30_G2, B4_G343	Lysogenic	None	hypothetical protein	NA	NA	NA	NA	NA	NA	NA	NA	NA	NA	OIP29741.1	60.6	155	57	1	1	155	1	151	3.10E-43	185.3	157	152	Proteobacteria	Deltaproteobacteria bacterium CG2_30_43_15	1805125	OIP29741.1 hypothetical protein AUK23_10130 [Deltaproteobacteria bacterium CG2_30_43_15]
Vedfolnir	Guay1_scaffold_2kb_Guay1_scaffold00443_24	(19134..19604)	1	Thorarchaeota B59_G1 (CRISPR), Chloroflexi B30_G2, B4_G344	Lysogenic	None	hypothetical protein	NA	NA	NA	NA	NA	NA	NA	NA	NA	NA	KYK22698.1	64.7	156	55	0	1	156	1	156	1.40E-48	203	157	156	Euryarchaeota	Thermoplasmatales archaeon SG8-52-4	1803819	KYK22698.1 hypothetical protein AYK24_00290 [Thermoplasmatales archaeon SG8-52-4]
Vedfolnir	Guay1_scaffold_2kb_Guay1_scaffold00443_24	(19134..19604)	1	Thorarchaeota B59_G1 (CRISPR), Chloroflexi B30_G2, B4_G345	Lysogenic	None	hypothetical protein	NA	NA	NA	NA	NA	NA	NA	NA	NA	NA	RLC82129.1	100	156	0	0	1	156	1	156	3.70E-81	311.2	157	156	Chloroflexi	Chloroflexi bacterium	2026724	RLC82129.1 hypothetical protein DRI81_00700 [Chloroflexi bacterium]
Vedfolnir	Guay1_scaffold_2kb_Guay1_scaffold00443_25	(19604..20332)	1	Thorarchaeota B59_G1 (CRISPR), Chloroflexi B30_G2, B4_G346	Lysogenic	None	hypothetical protein	NA	NA	NA	NA	NA	NA	NA	NA	NA	NA	KRT69463.1	33.7	208	119	9	1	200	1	197	2.50E-12	83.2	243	830	candidate division NC10	candidate division NC10 bacterium CSP1-5	1640516	KRT69463.1 peptidase S8/S53 subtilisin kexin sedolisin [candidate division NC10 bacterium CSP1-5]
Vedfolnir	Guay1_scaffold_2kb_Guay1_scaffold00443_25	(19604..20332)	1	Thorarchaeota B59_G1 (CRISPR), Chloroflexi B30_G2, B4_G347	Lysogenic	None	hypothetical protein	NA	NA	NA	NA	NA	NA	NA	NA	NA	NA	MBA3869137.1	31.8	201	125	6	1	200	2260	2449	1.10E-12	84.3	243	3225	N/A	N/A		MBA3869137.1 hypothetical protein [Anaerolineae bacterium]
Vedfolnir	Guay1_scaffold_2kb_Guay1_scaffold00443_25	(19604..20332)	1	Thorarchaeota B59_G1 (CRISPR), Chloroflexi B30_G2, B4_G348	Lysogenic	None	hypothetical protein	NA	NA	NA	NA	NA	NA	NA	NA	NA	NA	RLC83789.1	90.3	62	6	0	181	242	1	62	1.30E-19	107.5	243	62	Chloroflexi	Chloroflexi bacterium	2026724	RLC83789.1 hypothetical protein DRJ03_16140 [Chloroflexi bacterium]
Vedfolnir	Guay1_scaffold_2kb_Guay1_scaffold00443_25	(19604..20332)	1	Thorarchaeota B59_G1 (CRISPR), Chloroflexi B30_G2, B4_G349	Lysogenic	None	hypothetical protein	NA	NA	NA	NA	NA	NA	NA	NA	NA	NA	RLC82130.1	100	242	0	0	1	242	1	242	4.20E-132	481.1	243	242	Chloroflexi	Chloroflexi bacterium	2026724	RLC82130.1 hypothetical protein DRI81_00705 [Chloroflexi bacterium]
Vedfolnir	Guay1_scaffold_2kb_Guay1_scaffold00443_26	(20329..20637)	1	Thorarchaeota B59_G1 (CRISPR), Chloroflexi B30_G2, B4_G350	Lysogenic	None	hypothetical protein	NA	NA	NA	NA	NA	NA	NA	NA	NA	NA	WP_095044615.1	43.8	105	52	4	2	101	3	105	2.00E-06	62.4	103	106	Chloroflexi	Candidatus Promineofilum breve	1806508	WP_095044615.1 hypothetical protein [Candidatus Promineofilum breve]
Vedfolnir	Guay1_scaffold_2kb_Guay1_scaffold00443_26	(20329..20637)	1	Thorarchaeota B59_G1 (CRISPR), Chloroflexi B30_G2, B4_G351	Lysogenic	None	hypothetical protein	NA	NA	NA	NA	NA	NA	NA	NA	NA	NA	KKT30683.1	46.2	93	45	3	14	102	11	102	3.60E-08	68.2	103	102	0	Microgenomates group bacterium GW2011_GWF1_44_10	1618537	KKT30683.1 hypothetical protein UW18_C0012G0002 [Microgenomates group bacterium GW2011_GWF1_44_10]
Vedfolnir	Guay1_scaffold_2kb_Guay1_scaffold00443_26	(20329..20637)	1	Thorarchaeota B59_G1 (CRISPR), Chloroflexi B30_G2, B4_G352	Lysogenic	None	hypothetical protein	NA	NA	NA	NA	NA	NA	NA	NA	NA	NA	RLC83788.1	95.1	102	5	0	1	102	1	102	2.10E-45	191.8	103	102	Chloroflexi	Chloroflexi bacterium	2026724	RLC83788.1 hypothetical protein DRJ03_16135 [Chloroflexi bacterium]
Vedfolnir	Guay1_scaffold_2kb_Guay1_scaffold00443_26	(20329..20637)	1	Thorarchaeota B59_G1 (CRISPR), Chloroflexi B30_G2, B4_G353	Lysogenic	None	hypothetical protein	NA	NA	NA	NA	NA	NA	NA	NA	NA	NA	RLC82131.1	100	102	0	0	1	102	1	102	6.00E-48	200.3	103	102	Chloroflexi	Chloroflexi bacterium	2026724	RLC82131.1 hypothetical protein DRI81_00710 [Chloroflexi bacterium]
Vedfolnir	Guay1_scaffold_2kb_Guay1_scaffold00443_27	(20641..21033)	1	Thorarchaeota B59_G1 (CRISPR), Chloroflexi B30_G2, B4_G354	Lysogenic	None	hypothetical protein	NA	NA	NA	NA	NA	NA	NA	NA	NA	NA	RLC83787.1	99.2	130	1	0	1	130	1	130	9.60E-67	263.1	131	130	Chloroflexi	Chloroflexi bacterium	2026724	RLC83787.1 hypothetical protein DRJ03_16130 [Chloroflexi bacterium]
Vedfolnir	Guay1_scaffold_2kb_Guay1_scaffold00443_27	(20641..21033)	1	Thorarchaeota B59_G1 (CRISPR), Chloroflexi B30_G2, B4_G355	Lysogenic	None	hypothetical protein	NA	NA	NA	NA	NA	NA	NA	NA	NA	NA	RLC82132.1	100	130	0	0	1	130	1	130	4.30E-67	264.2	131	130	Chloroflexi	Chloroflexi bacterium	2026724	RLC82132.1 hypothetical protein DRI81_00715 [Chloroflexi bacterium]
Vedfolnir	Guay1_scaffold_2kb_Guay1_scaffold00443_28	(21036..21572)	1	Thorarchaeota B59_G1 (CRISPR), Chloroflexi B30_G2, B4_G356	Lysogenic	VOG00721	sp|P36934|VPS_BPP2 Tail completion protein S	178	Pfam	PF05069	Phage virion morphogenesis family	38	174	1.10E-10	TRUE	IPR006522	Phage virion morphogensis protein	WP_064257785.1	32.9	152	82	5	37	177	16	158	2.70E-11	79.3	179	159	Actinobacteria	Rhodococcus sp. HS-D2	1384636	WP_064257785.1 phage virion morphogenesis protein [Rhodococcus sp. HS-D2]
Vedfolnir	Guay1_scaffold_2kb_Guay1_scaffold00443_28	(21036..21572)	1	Thorarchaeota B59_G1 (CRISPR), Chloroflexi B30_G2, B4_G357	Lysogenic	VOG00721	sp|P36934|VPS_BPP2 Tail completion protein S	178	Pfam	PF05069	Phage virion morphogenesis family	38	174	1.10E-10	TRUE	IPR006522	Phage virion morphogensis protein	WP_073512322.1	32.6	144	84	3	37	176	15	149	3.20E-12	82.4	179	156	Actinobacteria	Rhodococcus erythropolis	1833	WP_073512322.1 phage virion morphogenesis protein [Rhodococcus erythropolis]
Vedfolnir	Guay1_scaffold_2kb_Guay1_scaffold00443_28	(21036..21572)	1	Thorarchaeota B59_G1 (CRISPR), Chloroflexi B30_G2, B4_G358	Lysogenic	VOG00721	sp|P36934|VPS_BPP2 Tail completion protein S	178	Pfam	PF05069	Phage virion morphogenesis family	38	174	1.10E-10	TRUE	IPR006522	Phage virion morphogensis protein	KAB2862270.1	32.3	161	95	5	17	173	10	160	3.20E-12	82.4	179	164	Chloroflexi	Anaerolineae bacterium	2052143	KAB2862270.1 hypothetical protein F9K46_07300 [Anaerolineae bacterium]
Vedfolnir	Guay1_scaffold_2kb_Guay1_scaffold00443_28	(21036..21572)	1	Thorarchaeota B59_G1 (CRISPR), Chloroflexi B30_G2, B4_G359	Lysogenic	VOG00721	sp|P36934|VPS_BPP2 Tail completion protein S	178	Pfam	PF05069	Phage virion morphogenesis family	38	174	1.10E-10	TRUE	IPR006522	Phage virion morphogensis protein	WP_060651020.1	33.6	152	81	5	37	177	16	158	2.40E-12	82.8	179	159	Actinobacteria	Rhodococcus pyridinivorans;Rhodococcus pyridinivorans KG-16	103816;1441730	WP_060651020.1 phage virion morphogenesis protein [Rhodococcus pyridinivorans]
Vedfolnir	Guay1_scaffold_2kb_Guay1_scaffold00443_28	(21036..21572)	1	Thorarchaeota B59_G1 (CRISPR), Chloroflexi B30_G2, B4_G360	Lysogenic	VOG00721	sp|P36934|VPS_BPP2 Tail completion protein S	178	Pfam	PF05069	Phage virion morphogenesis family	38	174	1.10E-10	TRUE	IPR006522	Phage virion morphogensis protein	WP_119385426.1	35	143	84	5	31	173	9	142	2.40E-12	82.8	179	147	Actinobacteria	Nakamurella silvestris	1645681	WP_119385426.1 phage virion morphogenesis protein [Nakamurella silvestris]
Vedfolnir	Guay1_scaffold_2kb_Guay1_scaffold00443_28	(21036..21572)	1	Thorarchaeota B59_G1 (CRISPR), Chloroflexi B30_G2, B4_G361	Lysogenic	VOG00721	sp|P36934|VPS_BPP2 Tail completion protein S	178	Pfam	PF05069	Phage virion morphogenesis family	38	174	1.10E-10	TRUE	IPR006522	Phage virion morphogensis protein	WP_151530661.1	33.3	144	83	3	37	176	15	149	1.40E-12	83.6	179	156	Actinobacteria	Rhodococcus erythropolis	1833	WP_151530661.1 phage virion morphogenesis protein [Rhodococcus erythropolis]
Vedfolnir	Guay1_scaffold_2kb_Guay1_scaffold00443_28	(21036..21572)	1	Thorarchaeota B59_G1 (CRISPR), Chloroflexi B30_G2, B4_G362	Lysogenic	VOG00721	sp|P36934|VPS_BPP2 Tail completion protein S	178	Pfam	PF05069	Phage virion morphogenesis family	38	174	1.10E-10	TRUE	IPR006522	Phage virion morphogensis protein	WP_151098010.1	33.3	144	83	3	37	176	15	149	1.10E-12	84	179	156	Actinobacteria	Rhodococcus erythropolis	1833	WP_151098010.1 phage virion morphogenesis protein [Rhodococcus erythropolis]
Vedfolnir	Guay1_scaffold_2kb_Guay1_scaffold00443_28	(21036..21572)	1	Thorarchaeota B59_G1 (CRISPR), Chloroflexi B30_G2, B4_G363	Lysogenic	VOG00721	sp|P36934|VPS_BPP2 Tail completion protein S	178	Pfam	PF05069	Phage virion morphogenesis family	38	174	1.10E-10	TRUE	IPR006522	Phage virion morphogensis protein	WP_125050806.1	34	144	82	3	37	176	15	149	3.80E-13	85.5	179	156	Actinobacteria	Rhodococcus sp. NJ-530	2490853	WP_125050806.1 phage virion morphogenesis protein [Rhodococcus sp. NJ-530]
Vedfolnir	Guay1_scaffold_2kb_Guay1_scaffold00443_28	(21036..21572)	1	Thorarchaeota B59_G1 (CRISPR), Chloroflexi B30_G2, B4_G364	Lysogenic	VOG00721	sp|P36934|VPS_BPP2 Tail completion protein S	178	Pfam	PF05069	Phage virion morphogenesis family	38	174	1.10E-10	TRUE	IPR006522	Phage virion morphogensis protein	RLC83786.1	98.3	178	3	0	1	178	1	178	2.30E-95	358.6	179	178	Chloroflexi	Chloroflexi bacterium	2026724	RLC83786.1 hypothetical protein DRJ03_16125 [Chloroflexi bacterium]
Vedfolnir	Guay1_scaffold_2kb_Guay1_scaffold00443_28	(21036..21572)	1	Thorarchaeota B59_G1 (CRISPR), Chloroflexi B30_G2, B4_G365	Lysogenic	VOG00721	sp|P36934|VPS_BPP2 Tail completion protein S	178	Pfam	PF05069	Phage virion morphogenesis family	38	174	1.10E-10	TRUE	IPR006522	Phage virion morphogensis protein	RLC82133.1	100	178	0	0	1	178	1	178	1.90E-97	365.5	179	178	Chloroflexi	Chloroflexi bacterium	2026724	RLC82133.1 hypothetical protein DRI81_00720 [Chloroflexi bacterium]
Vedfolnir	Guay1_scaffold_2kb_Guay1_scaffold00443_29	(21565..21966)	1	Thorarchaeota B59_G1 (CRISPR), Chloroflexi B30_G2, B4_G366	Lysogenic	None	hypothetical protein	NA	NA	NA	NA	NA	NA	NA	NA	NA	NA	RLI52673.1	100	41	0	0	94	134	1	41	7.40E-14	87.4	134	80	Candidatus Thorarchaeota	Candidatus Thorarchaeota archaeon	2053491	RLI52673.1 hypothetical protein DRP09_17425, partial [Candidatus Thorarchaeota archaeon]
Vedfolnir	Guay1_scaffold_2kb_Guay1_scaffold00443_29	(21565..21966)	1	Thorarchaeota B59_G1 (CRISPR), Chloroflexi B30_G2, B4_G367	Lysogenic	None	hypothetical protein	NA	NA	NA	NA	NA	NA	NA	NA	NA	NA	RLC83785.1	98.5	134	2	0	1	134	1	134	3.60E-69	271.2	134	174	Chloroflexi	Chloroflexi bacterium	2026724	RLC83785.1 hypothetical protein DRJ03_16120 [Chloroflexi bacterium]
Vedfolnir	Guay1_scaffold_2kb_Guay1_scaffold00443_29	(21565..21966)	1	Thorarchaeota B59_G1 (CRISPR), Chloroflexi B30_G2, B4_G368	Lysogenic	None	hypothetical protein	NA	NA	NA	NA	NA	NA	NA	NA	NA	NA	RLC82134.1	100	134	0	0	1	134	1	134	7.30E-70	273.5	134	134	Chloroflexi	Chloroflexi bacterium	2026724	RLC82134.1 hypothetical protein DRI81_00725, partial [Chloroflexi bacterium]
`Fenrir Meg22_1012`	Meg22_1012_scaffold_2kb_scaffold_226_1	(575..958)	-1	Lokiarchaeota	Lytic	None	hypothetical protein	NA	NA	NA	NA	NA	NA	NA	NA	NA	NA	NA	NA	NA	NA	NA	NA	NA	NA	NA	NA	NA	NA	NA	NA	NA	NA	NA
`Fenrir Meg22_1012`	Meg22_1012_scaffold_2kb_scaffold_226_2	(951..1103)	-1	Lokiarchaeota	Lytic	None	hypothetical protein	NA	NA	NA	NA	NA	NA	NA	NA	NA	NA	NA	NA	NA	NA	NA	NA	NA	NA	NA	NA	NA	NA	NA	NA	NA	NA	NA
`Fenrir Meg22_1012`	Meg22_1012_scaffold_2kb_scaffold_226_3	(1345..3063)	-1	Lokiarchaeota	Lytic	None	hypothetical protein	NA	NA	NA	NA	NA	NA	NA	NA	NA	NA	NA	NA	NA	NA	NA	NA	NA	NA	NA	NA	NA	NA	NA	NA	NA	NA	NA
`Fenrir Meg22_1012`	Meg22_1012_scaffold_2kb_scaffold_226_4	(4248..4691)	1	Lokiarchaeota	Lytic	None	hypothetical protein	NA	NA	NA	NA	NA	NA	NA	NA	NA	NA	HEA05401.1	54.5	134	61	0	11	144	3	136	3.00E-32	148.7	148	140	N/A	N/A		HEA05401.1 hypothetical protein [archaeon]
`Fenrir Meg22_1012`	Meg22_1012_scaffold_2kb_scaffold_226_5	(4688..4828)	1	Lokiarchaeota	Lytic	None	hypothetical protein	NA	NA	NA	NA	NA	NA	NA	NA	NA	NA	NA	NA	NA	NA	NA	NA	NA	NA	NA	NA	NA	NA	NA	NA	NA	NA	NA
`Fenrir Meg22_1012`	Meg22_1012_scaffold_2kb_scaffold_226_6	(4835..5128)	1	Lokiarchaeota	Lytic	None	hypothetical protein	NA	NA	NA	NA	NA	NA	NA	NA	NA	NA	NA	NA	NA	NA	NA	NA	NA	NA	NA	NA	NA	NA	NA	NA	NA	NA	NA
`Fenrir Meg22_1012`	Meg22_1012_scaffold_2kb_scaffold_226_7	(5132..6871)	1	Lokiarchaeota	Lytic	VOG00991	sp|P17312|TERL_BPT4 Terminase, large subunit	579	Gene3D	G3DSA:3.40.50.300	P-loop containing nucleotide triphosphate hydrolases	11	231	2.00E-23	TRUE			WP_169725485.1	30.3	261	126	12	282	537	165	374	2.40E-08	71.2	580	396	Firmicutes	Alicyclobacillus contaminans	392016	WP_169725485.1 hypothetical protein [Alicyclobacillus contaminans]
`Fenrir Meg22_1012`	Meg22_1012_scaffold_2kb_scaffold_226_7	(5132..6871)	1	Lokiarchaeota	Lytic	VOG00991	sp|P17312|TERL_BPT4 Terminase, large subunit	579	Gene3D	G3DSA:3.40.50.300	P-loop containing nucleotide triphosphate hydrolases	11	231	2.00E-23	TRUE			RMH07852.1	27.1	266	141	14	277	535	170	389	2.40E-08	71.2	580	408	Armatimonadetes	Armatimonadetes bacterium	2033014	RMH07852.1 hypothetical protein D6697_07640 [Armatimonadetes bacterium]
`Fenrir Meg22_1012`	Meg22_1012_scaffold_2kb_scaffold_226_7	(5132..6871)	1	Lokiarchaeota	Lytic	VOG00991	sp|P17312|TERL_BPT4 Terminase, large subunit	579	Gene3D	G3DSA:3.40.50.300	P-loop containing nucleotide triphosphate hydrolases	11	231	2.00E-23	TRUE			WP_146823918.1	30.8	260	128	14	281	537	186	396	2.80E-09	74.3	580	415	Firmicutes	Alicyclobacillus acidoterrestris	1450	WP_146823918.1 hypothetical protein [Alicyclobacillus acidoterrestris]
`Fenrir Meg22_1012`	Meg22_1012_scaffold_2kb_scaffold_226_7	(5132..6871)	1	Lokiarchaeota	Lytic	VOG00991	sp|P17312|TERL_BPT4 Terminase, large subunit	579	Gene3D	G3DSA:3.40.50.300	P-loop containing nucleotide triphosphate hydrolases	11	231	2.00E-23	TRUE			MBC7330269.1	23.3	463	277	14	79	536	19	408	4.30E-10	77	580	425	N/A	N/A		MBC7330269.1 hypothetical protein [bacterium]
`Fenrir Meg22_1012`	Meg22_1012_scaffold_2kb_scaffold_226_7	(5132..6871)	1	Lokiarchaeota	Lytic	VOG00991	sp|P17312|TERL_BPT4 Terminase, large subunit	579	Gene3D	G3DSA:3.40.50.300	P-loop containing nucleotide triphosphate hydrolases	11	231	2.00E-23	TRUE			PZN00714.1	25	488	254	24	65	536	25	416	1.60E-12	85.1	580	427	Firmicutes	Firmicutes bacterium	1879010	PZN00714.1 hypothetical protein DIU76_12120 [Firmicutes bacterium]
`Fenrir Meg22_1012`	Meg22_1012_scaffold_2kb_scaffold_226_7	(5132..6871)	1	Lokiarchaeota	Lytic	VOG00991	sp|P17312|TERL_BPT4 Terminase, large subunit	579	Gene3D	G3DSA:3.40.50.300	P-loop containing nucleotide triphosphate hydrolases	11	231	2.00E-23	TRUE			HEA05399.1	54.5	209	87	2	19	225	14	216	4.00E-56	229.9	580	217	N/A	N/A		HEA05399.1 hypothetical protein [archaeon]
`Fenrir Meg22_1012`	Meg22_1012_scaffold_2kb_scaffold_226_7	(5132..6871)	1	Lokiarchaeota	Lytic	VOG00991	sp|P17312|TERL_BPT4 Terminase, large subunit	579	Gene3D	G3DSA:3.40.50.300	P-loop containing nucleotide triphosphate hydrolases	11	231	2.00E-23	TRUE			HEA05398.1	54.3	221	96	2	278	498	1	216	2.30E-59	240.7	580	216	N/A	N/A		HEA05398.1 hypothetical protein [archaeon]
`Fenrir Meg22_1012`	Meg22_1012_scaffold_2kb_scaffold_226_7	(5132..6871)	1	Lokiarchaeota	Lytic	VOG00991	sp|P17312|TERL_BPT4 Terminase, large subunit	579	Gene3D	G3DSA:3.40.50.300	P-loop containing nucleotide triphosphate hydrolases	11	231	2.00E-23	TRUE			PNX48821.1	32.7	529	336	10	18	535	33	552	8.90E-72	282	580	567	Euryarchaeota	Thermoplasmata archaeon M11B2D	1933281	PNX48821.1 hypothetical protein BV459_01515 [Thermoplasmata archaeon M11B2D]
`Fenrir Meg22_1012`	Meg22_1012_scaffold_2kb_scaffold_226_7	(5132..6871)	1	Lokiarchaeota	Lytic	VOG00991	sp|P17312|TERL_BPT4 Terminase, large subunit	579	Gene3D	G3DSA:3.40.50.300	P-loop containing nucleotide triphosphate hydrolases	11	231	2.00E-23	TRUE			RLI45100.1	34.3	557	315	13	10	536	15	550	1.60E-81	314.3	580	570	Candidatus Bathyarchaeota	Candidatus Bathyarchaeota archaeon	2026714	RLI45100.1 hypothetical protein DRO61_11235 [Candidatus Bathyarchaeota archaeon]
`Fenrir Meg22_1012`	Meg22_1012_scaffold_2kb_scaffold_226_7	(5132..6871)	1	Lokiarchaeota	Lytic	VOG00991	sp|P17312|TERL_BPT4 Terminase, large subunit	579	Gene3D	G3DSA:3.40.50.300	P-loop containing nucleotide triphosphate hydrolases	11	231	2.00E-23	TRUE			HDZ29093.1	54.2	548	234	7	8	553	3	535	6.40E-163	584.7	580	568	N/A	N/A		HDZ29093.1 hypothetical protein [archaeon]
`Fenrir Meg22_1012`	Meg22_1012_scaffold_2kb_scaffold_226_7	(5132..6871)	1	Lokiarchaeota	Lytic	VOG00991	sp|P17312|TERL_BPT4 Terminase, large subunit	579	Gene3D	G3DSA:3.30.420.240	NA	320	537	1.70E-19	TRUE			WP_169725485.1	30.3	261	126	12	282	537	165	374	2.40E-08	71.2	580	396	Firmicutes	Alicyclobacillus contaminans	392016	WP_169725485.1 hypothetical protein [Alicyclobacillus contaminans]
`Fenrir Meg22_1012`	Meg22_1012_scaffold_2kb_scaffold_226_7	(5132..6871)	1	Lokiarchaeota	Lytic	VOG00991	sp|P17312|TERL_BPT4 Terminase, large subunit	579	Gene3D	G3DSA:3.30.420.240	NA	320	537	1.70E-19	TRUE			RMH07852.1	27.1	266	141	14	277	535	170	389	2.40E-08	71.2	580	408	Armatimonadetes	Armatimonadetes bacterium	2033014	RMH07852.1 hypothetical protein D6697_07640 [Armatimonadetes bacterium]
`Fenrir Meg22_1012`	Meg22_1012_scaffold_2kb_scaffold_226_7	(5132..6871)	1	Lokiarchaeota	Lytic	VOG00991	sp|P17312|TERL_BPT4 Terminase, large subunit	579	Gene3D	G3DSA:3.30.420.240	NA	320	537	1.70E-19	TRUE			WP_146823918.1	30.8	260	128	14	281	537	186	396	2.80E-09	74.3	580	415	Firmicutes	Alicyclobacillus acidoterrestris	1450	WP_146823918.1 hypothetical protein [Alicyclobacillus acidoterrestris]
`Fenrir Meg22_1012`	Meg22_1012_scaffold_2kb_scaffold_226_7	(5132..6871)	1	Lokiarchaeota	Lytic	VOG00991	sp|P17312|TERL_BPT4 Terminase, large subunit	579	Gene3D	G3DSA:3.30.420.240	NA	320	537	1.70E-19	TRUE			MBC7330269.1	23.3	463	277	14	79	536	19	408	4.30E-10	77	580	425	N/A	N/A		MBC7330269.1 hypothetical protein [bacterium]
`Fenrir Meg22_1012`	Meg22_1012_scaffold_2kb_scaffold_226_7	(5132..6871)	1	Lokiarchaeota	Lytic	VOG00991	sp|P17312|TERL_BPT4 Terminase, large subunit	579	Gene3D	G3DSA:3.30.420.240	NA	320	537	1.70E-19	TRUE			PZN00714.1	25	488	254	24	65	536	25	416	1.60E-12	85.1	580	427	Firmicutes	Firmicutes bacterium	1879010	PZN00714.1 hypothetical protein DIU76_12120 [Firmicutes bacterium]
`Fenrir Meg22_1012`	Meg22_1012_scaffold_2kb_scaffold_226_7	(5132..6871)	1	Lokiarchaeota	Lytic	VOG00991	sp|P17312|TERL_BPT4 Terminase, large subunit	579	Gene3D	G3DSA:3.30.420.240	NA	320	537	1.70E-19	TRUE			HEA05399.1	54.5	209	87	2	19	225	14	216	4.00E-56	229.9	580	217	N/A	N/A		HEA05399.1 hypothetical protein [archaeon]
`Fenrir Meg22_1012`	Meg22_1012_scaffold_2kb_scaffold_226_7	(5132..6871)	1	Lokiarchaeota	Lytic	VOG00991	sp|P17312|TERL_BPT4 Terminase, large subunit	579	Gene3D	G3DSA:3.30.420.240	NA	320	537	1.70E-19	TRUE			HEA05398.1	54.3	221	96	2	278	498	1	216	2.30E-59	240.7	580	216	N/A	N/A		HEA05398.1 hypothetical protein [archaeon]
`Fenrir Meg22_1012`	Meg22_1012_scaffold_2kb_scaffold_226_7	(5132..6871)	1	Lokiarchaeota	Lytic	VOG00991	sp|P17312|TERL_BPT4 Terminase, large subunit	579	Gene3D	G3DSA:3.30.420.240	NA	320	537	1.70E-19	TRUE			PNX48821.1	32.7	529	336	10	18	535	33	552	8.90E-72	282	580	567	Euryarchaeota	Thermoplasmata archaeon M11B2D	1933281	PNX48821.1 hypothetical protein BV459_01515 [Thermoplasmata archaeon M11B2D]
`Fenrir Meg22_1012`	Meg22_1012_scaffold_2kb_scaffold_226_7	(5132..6871)	1	Lokiarchaeota	Lytic	VOG00991	sp|P17312|TERL_BPT4 Terminase, large subunit	579	Gene3D	G3DSA:3.30.420.240	NA	320	537	1.70E-19	TRUE			RLI45100.1	34.3	557	315	13	10	536	15	550	1.60E-81	314.3	580	570	Candidatus Bathyarchaeota	Candidatus Bathyarchaeota archaeon	2026714	RLI45100.1 hypothetical protein DRO61_11235 [Candidatus Bathyarchaeota archaeon]
`Fenrir Meg22_1012`	Meg22_1012_scaffold_2kb_scaffold_226_7	(5132..6871)	1	Lokiarchaeota	Lytic	VOG00991	sp|P17312|TERL_BPT4 Terminase, large subunit	579	Gene3D	G3DSA:3.30.420.240	NA	320	537	1.70E-19	TRUE			HDZ29093.1	54.2	548	234	7	8	553	3	535	6.40E-163	584.7	580	568	N/A	N/A		HDZ29093.1 hypothetical protein [archaeon]
`Fenrir Meg22_1012`	Meg22_1012_scaffold_2kb_scaffold_226_8	(6895..8325)	1	Lokiarchaeota	Lytic	None	hypothetical protein	NA	NA	NA	NA	NA	NA	NA	NA	NA	NA	PNX48822.1	37.1	399	235	4	48	431	23	420	4.60E-66	262.7	477	447	Euryarchaeota	Thermoplasmata archaeon M11B2D	1933281	PNX48822.1 hypothetical protein BV459_01520 [Thermoplasmata archaeon M11B2D]
`Fenrir Meg22_1012`	Meg22_1012_scaffold_2kb_scaffold_226_8	(6895..8325)	1	Lokiarchaeota	Lytic	None	hypothetical protein	NA	NA	NA	NA	NA	NA	NA	NA	NA	NA	HDZ28855.1	41.6	478	254	8	1	458	1	473	1.00E-97	367.9	477	502	N/A	N/A		HDZ28855.1 hypothetical protein [archaeon]
`Fenrir Meg22_1012`	Meg22_1012_scaffold_2kb_scaffold_226_9	(8338..8685)	1	Lokiarchaeota	Lytic	None	hypothetical protein	NA	NA	NA	NA	NA	NA	NA	NA	NA	NA	NA	NA	NA	NA	NA	NA	NA	NA	NA	NA	NA	NA	NA	NA	NA	NA	NA
`Fenrir Meg22_1012`	Meg22_1012_scaffold_2kb_scaffold_226_10	(8692..8793)	1	Lokiarchaeota	Lytic	None	hypothetical protein	NA	NA	NA	NA	NA	NA	NA	NA	NA	NA	NA	NA	NA	NA	NA	NA	NA	NA	NA	NA	NA	NA	NA	NA	NA	NA	NA
`Fenrir Meg22_1012`	Meg22_1012_scaffold_2kb_scaffold_226_11	(8790..9149)	1	Lokiarchaeota	Lytic	VOG00106	sp|Q7Y5D9|FIBL2_BPT5 L-shaped tail fiber protein p132	NA	NA	NA	NA	NA	NA	NA	NA	NA	NA	RKZ32104.1	32.7	113	65	3	5	117	152	253	8.70E-06	60.5	120	255	0	bacterium	1869227	RKZ32104.1 hypothetical protein DRQ33_06485 [bacterium]
`Fenrir Meg22_1012`	Meg22_1012_scaffold_2kb_scaffold_226_11	(8790..9149)	1	Lokiarchaeota	Lytic	VOG00106	sp|Q7Y5D9|FIBL2_BPT5 L-shaped tail fiber protein p132	NA	NA	NA	NA	NA	NA	NA	NA	NA	NA	RKZ25567.1	32.5	114	66	2	5	118	144	246	2.70E-07	65.5	120	247	0	bacterium	1869227	RKZ25567.1 hypothetical protein DRQ26_05695 [bacterium]
`Fenrir Meg22_1012`	Meg22_1012_scaffold_2kb_scaffold_226_11	(8790..9149)	1	Lokiarchaeota	Lytic	VOG00106	sp|Q7Y5D9|FIBL2_BPT5 L-shaped tail fiber protein p132	NA	NA	NA	NA	NA	NA	NA	NA	NA	NA	OGX06478.1	37.8	111	61	2	8	118	9	111	1.20E-07	66.6	120	117	Candidatus Omnitrophica	Omnitrophica WOR_2 bacterium GWA2_47_8	1801840	OGX06478.1 hypothetical protein A2Z88_03410 [Omnitrophica WOR_2 bacterium GWA2_47_8]
`Fenrir Meg22_1012`	Meg22_1012_scaffold_2kb_scaffold_226_11	(8790..9149)	1	Lokiarchaeota	Lytic	VOG00106	sp|Q7Y5D9|FIBL2_BPT5 L-shaped tail fiber protein p132	NA	NA	NA	NA	NA	NA	NA	NA	NA	NA	HHA18786.1	33.3	120	58	3	8	119	7	112	3.80E-09	71.6	120	114	N/A	N/A		HHA18786.1 DUF2479 domain-containing protein [Methylophaga sp.]
`Fenrir Meg22_1012`	Meg22_1012_scaffold_2kb_scaffold_226_11	(8790..9149)	1	Lokiarchaeota	Lytic	VOG00106	sp|Q7Y5D9|FIBL2_BPT5 L-shaped tail fiber protein p132	NA	NA	NA	NA	NA	NA	NA	NA	NA	NA	HHH80446.1	33.9	115	65	2	5	119	201	304	2.60E-10	75.5	120	304	N/A	N/A		HHH80446.1 DUF2479 domain-containing protein [candidate division Zixibacteria bacterium]
`Fenrir Meg22_1012`	Meg22_1012_scaffold_2kb_scaffold_226_12	(9149..9667)	1	Lokiarchaeota	Lytic	None	hypothetical protein	NA	NA	NA	NA	NA	NA	NA	NA	NA	NA	HDZ28853.1	29.9	167	109	5	3	163	4	168	6.60E-07	64.7	173	170	N/A	N/A		HDZ28853.1 hypothetical protein [archaeon]
`Fenrir Meg22_1012`	Meg22_1012_scaffold_2kb_scaffold_226_13	(9693..10046)	1	Lokiarchaeota	Lytic	None	hypothetical protein	NA	NA	NA	NA	NA	NA	NA	NA	NA	NA	HDZ28852.1	37.5	80	47	2	7	85	13	90	1.00E-06	63.5	118	119	N/A	N/A		HDZ28852.1 hypothetical protein [archaeon]
`Fenrir Meg22_1012`	Meg22_1012_scaffold_2kb_scaffold_226_14	(10099..11106)	1	Lokiarchaeota	Lytic	None	hypothetical protein	NA	NA	NA	NA	NA	NA	NA	NA	NA	NA	NA	NA	NA	NA	NA	NA	NA	NA	NA	NA	NA	NA	NA	NA	NA	NA	NA
`Fenrir Meg22_1012`	Meg22_1012_scaffold_2kb_scaffold_226_15	(11122..11646)	1	Lokiarchaeota	Lytic	None	hypothetical protein	NA	NA	NA	NA	NA	NA	NA	NA	NA	NA	HEA08694.1	42.9	147	83	1	25	171	18	163	8.70E-23	117.5	175	166	N/A	N/A		HEA08694.1 hypothetical protein [archaeon]
`Fenrir Meg22_1012`	Meg22_1012_scaffold_2kb_scaffold_226_15	(11122..11646)	1	Lokiarchaeota	Lytic	None	hypothetical protein	NA	NA	NA	NA	NA	NA	NA	NA	NA	NA	HEC39721.1	49	147	75	0	25	171	18	164	9.60E-30	140.6	175	167	N/A	N/A		HEC39721.1 hypothetical protein [bacterium]
`Fenrir Meg22_1012`	Meg22_1012_scaffold_2kb_scaffold_226_16	(11660..12781)	1	Lokiarchaeota	Lytic	None	hypothetical protein	NA	NA	NA	NA	NA	NA	NA	NA	NA	NA	HEC39720.1	54.9	375	164	3	3	373	7	380	1.10E-115	427.2	374	380	N/A	N/A		HEC39720.1 hypothetical protein [bacterium]
`Fenrir Meg22_1012`	Meg22_1012_scaffold_2kb_scaffold_226_16	(11660..12781)	1	Lokiarchaeota	Lytic	None	hypothetical protein	NA	NA	NA	NA	NA	NA	NA	NA	NA	NA	HEA08695.1	55.9	374	161	2	3	373	7	379	2.00E-117	433	374	379	N/A	N/A		HEA08695.1 hypothetical protein [archaeon]
`Fenrir Meg22_1012`	Meg22_1012_scaffold_2kb_scaffold_226_17	(12782..13360)	1	Lokiarchaeota	Lytic	None	hypothetical protein	NA	NA	NA	NA	NA	NA	NA	NA	NA	NA	PNX48636.1	31.3	147	99	2	1	147	1	145	3.00E-08	69.3	193	177	Euryarchaeota	Thermoplasmata archaeon M11B2D	1933281	PNX48636.1 hypothetical protein BV459_01960 [Thermoplasmata archaeon M11B2D]
`Fenrir Meg22_1012`	Meg22_1012_scaffold_2kb_scaffold_226_17	(12782..13360)	1	Lokiarchaeota	Lytic	None	hypothetical protein	NA	NA	NA	NA	NA	NA	NA	NA	NA	NA	RLC37101.1	32.8	174	104	5	1	173	1	162	5.50E-10	75.1	193	176	0	candidate division Kazan bacterium	2202143	RLC37101.1 hypothetical protein DRH29_03055 [candidate division Kazan bacterium]
`Fenrir Meg22_1012`	Meg22_1012_scaffold_2kb_scaffold_226_17	(12782..13360)	1	Lokiarchaeota	Lytic	None	hypothetical protein	NA	NA	NA	NA	NA	NA	NA	NA	NA	NA	HEC39719.1	45.2	177	93	1	5	181	4	176	4.50E-36	161.8	193	190	N/A	N/A		HEC39719.1 hypothetical protein [bacterium]
`Fenrir Meg22_1012`	Meg22_1012_scaffold_2kb_scaffold_226_17	(12782..13360)	1	Lokiarchaeota	Lytic	None	hypothetical protein	NA	NA	NA	NA	NA	NA	NA	NA	NA	NA	HEA08696.1	46.3	177	89	2	5	181	4	174	5.30E-37	164.9	193	190	N/A	N/A		HEA08696.1 hypothetical protein [archaeon]
`Fenrir Meg22_1012`	Meg22_1012_scaffold_2kb_scaffold_226_18	(13361..13741)	1	Lokiarchaeota	Lytic	None	hypothetical protein	NA	NA	NA	NA	NA	NA	NA	NA	NA	NA	NA	NA	NA	NA	NA	NA	NA	NA	NA	NA	NA	NA	NA	NA	NA	NA	NA
`Fenrir Meg22_1012`	Meg22_1012_scaffold_2kb_scaffold_226_19	(13731..14357)	1	Lokiarchaeota	Lytic	None	hypothetical protein	NA	NA	NA	NA	NA	NA	NA	NA	NA	NA	HEA08698.1	45	140	71	2	1	136	1	138	4.00E-22	115.5	209	140	N/A	N/A		HEA08698.1 hypothetical protein [archaeon]
`Fenrir Meg22_1012`	Meg22_1012_scaffold_2kb_scaffold_226_19	(13731..14357)	1	Lokiarchaeota	Lytic	None	hypothetical protein	NA	NA	NA	NA	NA	NA	NA	NA	NA	NA	HDZ28999.1	42.2	187	102	2	1	183	1	185	8.00E-31	144.4	209	209	N/A	N/A		HDZ28999.1 hypothetical protein [archaeon]
`Fenrir Meg22_1012`	Meg22_1012_scaffold_2kb_scaffold_226_20	(14431..15864)	1	Lokiarchaeota	Lytic	None	hypothetical protein	NA	NA	NA	NA	NA	NA	NA	NA	NA	NA	PNX48633.1	24.2	359	236	14	147	475	158	510	2.80E-07	67.4	478	510	Euryarchaeota	Thermoplasmata archaeon M11B2D	1933281	PNX48633.1 hypothetical protein BV459_01945 [Thermoplasmata archaeon M11B2D]
`Fenrir Meg22_1012`	Meg22_1012_scaffold_2kb_scaffold_226_20	(14431..15864)	1	Lokiarchaeota	Lytic	None	hypothetical protein	NA	NA	NA	NA	NA	NA	NA	NA	NA	NA	HDZ29000.1	42.4	486	268	7	1	476	1	484	2.90E-105	392.9	478	485	N/A	N/A		HDZ29000.1 hypothetical protein [archaeon]
`Fenrir Meg22_1012`	Meg22_1012_scaffold_2kb_scaffold_226_21	(15880..16449)	1	Lokiarchaeota	Lytic	None	hypothetical protein	NA	NA	NA	NA	NA	NA	NA	NA	NA	NA	HDZ29001.1	48.4	182	83	4	4	180	5	180	4.20E-39	171.8	190	200	N/A	N/A		HDZ29001.1 hypothetical protein [archaeon]
`Fenrir Meg22_1012`	Meg22_1012_scaffold_2kb_scaffold_226_22	(16480..17169)	1	Lokiarchaeota	Lytic	None	hypothetical protein	NA	NA	NA	NA	NA	NA	NA	NA	NA	NA	MBD3352111.1	37.8	193	102	8	10	188	5	193	4.10E-20	109	230	232	N/A	N/A		MBD3352111.1 hypothetical protein [Candidatus Lokiarchaeota archaeon]
`Fenrir Meg22_1012`	Meg22_1012_scaffold_2kb_scaffold_226_22	(16480..17169)	1	Lokiarchaeota	Lytic	None	hypothetical protein	NA	NA	NA	NA	NA	NA	NA	NA	NA	NA	NHJ40122.1	31.4	229	141	6	8	223	7	232	1.30E-21	114	230	235	N/A	N/A		NHJ40122.1 hypothetical protein [Asgard group archaeon]
`Fenrir Meg22_1012`	Meg22_1012_scaffold_2kb_scaffold_226_22	(16480..17169)	1	Lokiarchaeota	Lytic	None	hypothetical protein	NA	NA	NA	NA	NA	NA	NA	NA	NA	NA	HEC39714.1	52.7	182	82	3	1	180	1	180	3.00E-47	199.1	230	180	N/A	N/A		HEC39714.1 hypothetical protein [bacterium]
`Fenrir Meg22_1012`	Meg22_1012_scaffold_2kb_scaffold_226_22	(16480..17169)	1	Lokiarchaeota	Lytic	None	hypothetical protein	NA	NA	NA	NA	NA	NA	NA	NA	NA	NA	HDZ29002.1	48.3	230	113	4	1	228	1	226	1.90E-54	223	230	230	N/A	N/A		HDZ29002.1 hypothetical protein [archaeon]
`Fenrir Meg22_1012`	Meg22_1012_scaffold_2kb_scaffold_226_23	(17156..19033)	1	Lokiarchaeota	Lytic	None	hypothetical protein	NA	NA	NA	NA	NA	NA	NA	NA	NA	NA	NA	NA	NA	NA	NA	NA	NA	NA	NA	NA	NA	NA	NA	NA	NA	NA	NA
`Fenrir Meg22_1012`	Meg22_1012_scaffold_2kb_scaffold_226_24	(19035..20366)	1	Lokiarchaeota	Lytic	None	hypothetical protein	NA	NA	NA	NA	NA	NA	NA	NA	NA	NA	HDZ29004.1	36.9	312	185	8	135	440	174	479	2.60E-39	173.7	444	482	N/A	N/A		HDZ29004.1 hypothetical protein [archaeon]
`Fenrir Meg22_1012`	Meg22_1012_scaffold_2kb_scaffold_226_25	(20363..21538)	1	Lokiarchaeota	Lytic	None	hypothetical protein	NA	NA	NA	NA	NA	NA	NA	NA	NA	NA	RLI46013.1	31.9	235	131	5	88	295	48	280	3.10E-20	110.2	392	327	Candidatus Bathyarchaeota	Candidatus Bathyarchaeota archaeon	2026714	RLI46013.1 hypothetical protein DRO61_09790 [Candidatus Bathyarchaeota archaeon]
`Fenrir Meg22_1012`	Meg22_1012_scaffold_2kb_scaffold_226_25	(20363..21538)	1	Lokiarchaeota	Lytic	None	hypothetical protein	NA	NA	NA	NA	NA	NA	NA	NA	NA	NA	HDZ29005.1	43.6	225	116	3	65	279	64	287	2.40E-44	190.3	392	289	N/A	N/A		HDZ29005.1 hypothetical protein [archaeon]
`Fenrir Meg22_1012`	Meg22_1012_scaffold_2kb_scaffold_226_26	(21531..23297)	1	Lokiarchaeota	Lytic	None	hypothetical protein	NA	NA	NA	NA	NA	NA	NA	NA	NA	NA	NA	NA	NA	NA	NA	NA	NA	NA	NA	NA	NA	NA	NA	NA	NA	NA	NA
`Fenrir Meg22_1012`	Meg22_1012_scaffold_2kb_scaffold_226_27	(23300..25750)	1	Lokiarchaeota	Lytic	VOG16939	HNH endonuclease	NA	NA	NA	NA	NA	NA	NA	NA	NA	NA	HEA10922.1	33.4	446	268	11	131	570	155	577	2.40E-46	198	817	1024	N/A	N/A		HEA10922.1 hypothetical protein [archaeon]
`Fenrir Meg22_1012`	Meg22_1012_scaffold_2kb_scaffold_226_27	(23300..25750)	1	Lokiarchaeota	Lytic	VOG16939	HNH endonuclease	NA	NA	NA	NA	NA	NA	NA	NA	NA	NA	NOR85400.1	32.2	438	256	9	162	572	10	433	1.40E-46	198.7	817	636	N/A	N/A		NOR85400.1 hypothetical protein [archaeon]
`Fenrir Meg22_1012`	Meg22_1012_scaffold_2kb_scaffold_226_27	(23300..25750)	1	Lokiarchaeota	Lytic	VOG16939	HNH endonuclease	NA	NA	NA	NA	NA	NA	NA	NA	NA	NA	ALM09909.1	40.3	320	164	9	133	433	702	1013	6.00E-50	209.9	817	1121	Candidatus Peregrinibacteria	Candidatus Peribacter riflensis;Candidatus Peribacteria bacterium RIFOXYB1_FULL_57_12	1735162;1801935	ALM09909.1 integrase catalytic subunit [Candidatus Peribacter riflensis]
`Fenrir Meg22_1012`	Meg22_1012_scaffold_2kb_scaffold_226_27	(23300..25750)	1	Lokiarchaeota	Lytic	VOG16939	HNH endonuclease	NA	NA	NA	NA	NA	NA	NA	NA	NA	NA	OEU52203.1	40.1	304	174	7	132	433	419	716	4.60E-50	210.3	817	1341	Proteobacteria	Desulfuromonadales bacterium C00003096	1869311	OEU52203.1 hypothetical protein BA871_06320, partial [Desulfuromonadales bacterium C00003096]
`Fenrir Meg22_1012`	Meg22_1012_scaffold_2kb_scaffold_226_27	(23300..25750)	1	Lokiarchaeota	Lytic	VOG16939	HNH endonuclease	NA	NA	NA	NA	NA	NA	NA	NA	NA	NA	TAK96141.1	37.8	325	190	5	132	449	978	1297	2.70E-50	211.1	817	1407	0	Patescibacteria group bacterium	2052139	TAK96141.1 hypothetical protein EPO05_02505, partial [Patescibacteria group bacterium]
`Fenrir Meg22_1012`	Meg22_1012_scaffold_2kb_scaffold_226_27	(23300..25750)	1	Lokiarchaeota	Lytic	VOG16939	HNH endonuclease	NA	NA	NA	NA	NA	NA	NA	NA	NA	NA	OIO53618.1	40.1	324	182	6	131	449	138	454	2.90E-52	217.6	817	576	Candidatus Peregrinibacteria	Candidatus Peregrinibacteria bacterium CG1_02_54_53	1805323	OIO53618.1 hypothetical protein AUJ46_04475 [Candidatus Peregrinibacteria bacterium CG1_02_54_53]
`Fenrir Meg22_1012`	Meg22_1012_scaffold_2kb_scaffold_226_27	(23300..25750)	1	Lokiarchaeota	Lytic	VOG16939	HNH endonuclease	NA	NA	NA	NA	NA	NA	NA	NA	NA	NA	TAK96740.1	35.3	416	251	8	140	546	863	1269	1.30E-52	218.8	817	2371	0	Patescibacteria group bacterium	2052139	TAK96740.1 hypothetical protein EPO05_01005 [Patescibacteria group bacterium]
`Fenrir Meg22_1012`	Meg22_1012_scaffold_2kb_scaffold_226_27	(23300..25750)	1	Lokiarchaeota	Lytic	VOG16939	HNH endonuclease	NA	NA	NA	NA	NA	NA	NA	NA	NA	NA	RLC66057.1	38.2	346	207	4	108	446	214	559	3.10E-54	224.2	817	817	Chloroflexi	Chloroflexi bacterium	2026724	RLC66057.1 hypothetical protein DRH97_07090, partial [Chloroflexi bacterium]
`Fenrir Meg22_1012`	Meg22_1012_scaffold_2kb_scaffold_226_27	(23300..25750)	1	Lokiarchaeota	Lytic	VOG16939	HNH endonuclease	NA	NA	NA	NA	NA	NA	NA	NA	NA	NA	HEC66226.1	35.1	450	260	10	128	568	202	628	5.60E-56	229.9	817	1006	N/A	N/A		HEC66226.1 hypothetical protein [bacterium]
`Fenrir Meg22_1012`	Meg22_1012_scaffold_2kb_scaffold_226_27	(23300..25750)	1	Lokiarchaeota	Lytic	VOG16939	HNH endonuclease	NA	NA	NA	NA	NA	NA	NA	NA	NA	NA	NIT75520.1	40	325	191	4	126	448	222	544	1.10E-62	252.3	817	786	N/A	N/A		NIT75520.1 hypothetical protein [Thermoplasmata archaeon]
`Fenrir Meg22_1012`	Meg22_1012_scaffold_2kb_scaffold_226_28	(25753..26190)	1	Lokiarchaeota	Lytic	None	hypothetical protein	NA	NA	NA	NA	NA	NA	NA	NA	NA	NA	NA	NA	NA	NA	NA	NA	NA	NA	NA	NA	NA	NA	NA	NA	NA	NA	NA
`Fenrir Meg22_1012`	Meg22_1012_scaffold_2kb_scaffold_226_29	(26195..26905)	1	Lokiarchaeota	Lytic	None	hypothetical protein	NA	NA	NA	NA	NA	NA	NA	NA	NA	NA	NA	NA	NA	NA	NA	NA	NA	NA	NA	NA	NA	NA	NA	NA	NA	NA	NA
`Fenrir Meg22_1012`	Meg22_1012_scaffold_2kb_scaffold_226_30	(26847..27170)	1	Lokiarchaeota	Lytic	None	hypothetical protein	NA	NA	NA	NA	NA	NA	NA	NA	NA	NA	NA	NA	NA	NA	NA	NA	NA	NA	NA	NA	NA	NA	NA	NA	NA	NA	NA
`Fenrir Meg22_1012`	Meg22_1012_scaffold_2kb_scaffold_226_31	(27266..27682)	1	Lokiarchaeota	Lytic	None	hypothetical protein	NA	NA	NA	NA	NA	NA	NA	NA	NA	NA	NA	NA	NA	NA	NA	NA	NA	NA	NA	NA	NA	NA	NA	NA	NA	NA	NA
`Fenrir Meg22_1012`	Meg22_1012_scaffold_2kb_scaffold_226_32	(27744..28115)	1	Lokiarchaeota	Lytic	None	hypothetical protein	123	Gene3D	G3DSA:3.10.450.40	Unknown	12	120	6.00E-07	TRUE			NA	NA	NA	NA	NA	NA	NA	NA	NA	NA	NA	NA	NA	NA	NA	NA	NA
`Fenrir Meg22_1012`	Meg22_1012_scaffold_2kb_scaffold_226_33	(28132..29970)	1	Lokiarchaeota	Lytic	VOG00243	sp|P51767|BPJ_BPP2 Baseplate protein J	612	Pfam	PF04865	Baseplate J-like protein	71	132	3.50E-06	TRUE	IPR006949	Baseplate protein J-like	NA	NA	NA	NA	NA	NA	NA	NA	NA	NA	NA	NA	NA	NA	NA	NA	NA
`Fenrir Meg22_1012`	Meg22_1012_scaffold_2kb_scaffold_226_33	(28132..29970)	1	Lokiarchaeota	Lytic	VOG00243	sp|P51767|BPJ_BPP2 Baseplate protein J	612	Pfam	PF04865	Baseplate J-like protein	201	291	4.80E-07	TRUE	IPR006949	Baseplate protein J-like	NA	NA	NA	NA	NA	NA	NA	NA	NA	NA	NA	NA	NA	NA	NA	NA	NA
`Fenrir Meg22_1012`	Meg22_1012_scaffold_2kb_scaffold_226_34	(29975..31738)	1	Lokiarchaeota	Lytic	None	hypothetical protein	NA	NA	NA	NA	NA	NA	NA	NA	NA	NA	NA	NA	NA	NA	NA	NA	NA	NA	NA	NA	NA	NA	NA	NA	NA	NA	NA
`Fenrir Meg22_1012`	Meg22_1012_scaffold_2kb_scaffold_226_35	(31740..32441)	1	Lokiarchaeota	Lytic	None	hypothetical protein	NA	NA	NA	NA	NA	NA	NA	NA	NA	NA	NA	NA	NA	NA	NA	NA	NA	NA	NA	NA	NA	NA	NA	NA	NA	NA	NA
`Fenrir Meg22_1012`	Meg22_1012_scaffold_2kb_scaffold_226_36	(32443..32874)	1	Lokiarchaeota	Lytic	None	hypothetical protein	NA	NA	NA	NA	NA	NA	NA	NA	NA	NA	MBD3260458.1	70.8	65	19	0	78	142	44	108	2.20E-16	95.9	144	111	N/A	N/A		MBD3260458.1 hypothetical protein [Candidatus Altiarchaeales archaeon]
`Fenrir Meg22_1012`	Meg22_1012_scaffold_2kb_scaffold_226_37	(32882..33241)	1	Lokiarchaeota	Lytic	None	hypothetical protein	NA	NA	NA	NA	NA	NA	NA	NA	NA	NA	NA	NA	NA	NA	NA	NA	NA	NA	NA	NA	NA	NA	NA	NA	NA	NA	NA
`Fenrir Meg22_1012`	Meg22_1012_scaffold_2kb_scaffold_226_38	(33234..34505)	1	Lokiarchaeota	Lytic	None	hypothetical protein	NA	NA	NA	NA	NA	NA	NA	NA	NA	NA	NA	NA	NA	NA	NA	NA	NA	NA	NA	NA	NA	NA	NA	NA	NA	NA	NA
`Fenrir Meg22_1012`	Meg22_1012_scaffold_2kb_scaffold_226_39	(34511..35248)	1	Lokiarchaeota	Lytic	None	hypothetical protein	NA	NA	NA	NA	NA	NA	NA	NA	NA	NA	NA	NA	NA	NA	NA	NA	NA	NA	NA	NA	NA	NA	NA	NA	NA	NA	NA
`Fenrir Meg22_1012`	Meg22_1012_scaffold_2kb_scaffold_226_40	(35251..35856)	1	Lokiarchaeota	Lytic	PF17784.1	Sulfotransferase domain	201	Gene3D	G3DSA:3.40.50.300	P-loop containing nucleotide triphosphate hydrolases	5	200	3.20E-36	TRUE			PIW36693.1	36.4	195	94	5	13	180	7	198	1.10E-24	124	202	201	Candidatus Kerfeldbacteria	Candidatus Kerfeldbacteria bacterium CG_4_9_14_3_um_filter_45_8;Candidatus Kerfeldbacteria bacterium CG15_BIG_FIL_POST_REV_8_21_14_020_45_12	2014243;2014247	PIW36693.1 hypothetical protein COW24_03975 [Candidatus Kerfeldbacteria bacterium CG15_BIG_FIL_POST_REV_8_21_14_020_45_12]
`Fenrir Meg22_1012`	Meg22_1012_scaffold_2kb_scaffold_226_40	(35251..35856)	1	Lokiarchaeota	Lytic	PF17784.1	Sulfotransferase domain	201	Gene3D	G3DSA:3.40.50.300	P-loop containing nucleotide triphosphate hydrolases	5	200	3.20E-36	TRUE			HAN73508.1	40.9	176	92	4	10	180	195	363	8.30E-25	124.4	202	788	N/A	N/A		HAN73508.1 hypothetical protein [Planktothrix sp. UBA8402]
`Fenrir Meg22_1012`	Meg22_1012_scaffold_2kb_scaffold_226_40	(35251..35856)	1	Lokiarchaeota	Lytic	PF17784.1	Sulfotransferase domain	201	Gene3D	G3DSA:3.40.50.300	P-loop containing nucleotide triphosphate hydrolases	5	200	3.20E-36	TRUE			HHX91536.1	37.4	187	98	5	13	185	2	183	6.30E-25	124.8	202	186	N/A	N/A		HHX91536.1 hypothetical protein [Paracoccus sp.]
`Fenrir Meg22_1012`	Meg22_1012_scaffold_2kb_scaffold_226_40	(35251..35856)	1	Lokiarchaeota	Lytic	PF17784.1	Sulfotransferase domain	201	Gene3D	G3DSA:3.40.50.300	P-loop containing nucleotide triphosphate hydrolases	5	200	3.20E-36	TRUE			WP_125219850.1	38.8	183	97	4	10	180	4	183	4.80E-25	125.2	202	457	Proteobacteria	Methylomicrobium sp. wino1	2049332	WP_125219850.1 hypothetical protein [Methylomicrobium sp. wino1]
`Fenrir Meg22_1012`	Meg22_1012_scaffold_2kb_scaffold_226_40	(35251..35856)	1	Lokiarchaeota	Lytic	PF17784.1	Sulfotransferase domain	201	Gene3D	G3DSA:3.40.50.300	P-loop containing nucleotide triphosphate hydrolases	5	200	3.20E-36	TRUE			MBA3551195.1	41.4	181	91	4	13	186	52	224	3.70E-25	125.6	202	226	N/A	N/A		MBA3551195.1 hypothetical protein [Patescibacteria group bacterium]
`Fenrir Meg22_1012`	Meg22_1012_scaffold_2kb_scaffold_226_40	(35251..35856)	1	Lokiarchaeota	Lytic	PF17784.1	Sulfotransferase domain	201	Gene3D	G3DSA:3.40.50.300	P-loop containing nucleotide triphosphate hydrolases	5	200	3.20E-36	TRUE			HHM04769.1	40.8	179	92	3	13	180	6	181	1.70E-25	126.7	202	443	N/A	N/A		HHM04769.1 hypothetical protein [Gammaproteobacteria bacterium]
`Fenrir Meg22_1012`	Meg22_1012_scaffold_2kb_scaffold_226_40	(35251..35856)	1	Lokiarchaeota	Lytic	PF17784.1	Sulfotransferase domain	201	Gene3D	G3DSA:3.40.50.300	P-loop containing nucleotide triphosphate hydrolases	5	200	3.20E-36	TRUE			ALP54080.1	40.6	180	91	5	13	180	9	184	1.20E-26	130.6	202	433	Proteobacteria	Candidatus Tenderia electrophaga	1748243	ALP54080.1 hypothetical protein Tel_13585 [Candidatus Tenderia electrophaga]
`Fenrir Meg22_1012`	Meg22_1012_scaffold_2kb_scaffold_226_40	(35251..35856)	1	Lokiarchaeota	Lytic	PF17784.1	Sulfotransferase domain	201	Gene3D	G3DSA:3.40.50.300	P-loop containing nucleotide triphosphate hydrolases	5	200	3.20E-36	TRUE			NBO99654.1	42.8	173	86	5	13	182	2	164	8.00E-28	134.4	202	167	N/A	N/A		NBO99654.1 hypothetical protein [Proteobacteria bacterium]
`Fenrir Meg22_1012`	Meg22_1012_scaffold_2kb_scaffold_226_40	(35251..35856)	1	Lokiarchaeota	Lytic	PF17784.1	Sulfotransferase domain	201	Gene3D	G3DSA:3.40.50.300	P-loop containing nucleotide triphosphate hydrolases	5	200	3.20E-36	TRUE			WP_104420094.1	41	188	96	4	13	188	2	186	7.20E-29	137.9	202	186	Bacteroidetes	Lewinella xylanilytica	1514080	WP_104420094.1 hypothetical protein [Lewinella xylanilytica]
`Fenrir Meg22_1012`	Meg22_1012_scaffold_2kb_scaffold_226_40	(35251..35856)	1	Lokiarchaeota	Lytic	PF17784.1	Sulfotransferase domain	201	Gene3D	G3DSA:3.40.50.300	P-loop containing nucleotide triphosphate hydrolases	5	200	3.20E-36	TRUE			MAG95060.1	45.5	178	89	5	11	186	7	178	9.10E-32	147.5	202	280	N/A	N/A		MAG95060.1 hypothetical protein [Rhodospirillaceae bacterium]
`Fenrir Meg22_1012`	Meg22_1012_scaffold_2kb_scaffold_226_40	(35251..35856)	1	Lokiarchaeota	Lytic	PF17784.1	Sulfotransferase domain	201	SUPERFAMILY	SSF52540	NA	12	188	1.20E-15	TRUE	IPR027417	P-loop containing nucleoside triphosphate hydrolase	PIW36693.1	36.4	195	94	5	13	180	7	198	1.10E-24	124	202	201	Candidatus Kerfeldbacteria	Candidatus Kerfeldbacteria bacterium CG_4_9_14_3_um_filter_45_8;Candidatus Kerfeldbacteria bacterium CG15_BIG_FIL_POST_REV_8_21_14_020_45_12	2014243;2014247	PIW36693.1 hypothetical protein COW24_03975 [Candidatus Kerfeldbacteria bacterium CG15_BIG_FIL_POST_REV_8_21_14_020_45_12]
`Fenrir Meg22_1012`	Meg22_1012_scaffold_2kb_scaffold_226_40	(35251..35856)	1	Lokiarchaeota	Lytic	PF17784.1	Sulfotransferase domain	201	SUPERFAMILY	SSF52540	NA	12	188	1.20E-15	TRUE	IPR027417	P-loop containing nucleoside triphosphate hydrolase	HAN73508.1	40.9	176	92	4	10	180	195	363	8.30E-25	124.4	202	788	N/A	N/A		HAN73508.1 hypothetical protein [Planktothrix sp. UBA8402]
`Fenrir Meg22_1012`	Meg22_1012_scaffold_2kb_scaffold_226_40	(35251..35856)	1	Lokiarchaeota	Lytic	PF17784.1	Sulfotransferase domain	201	SUPERFAMILY	SSF52540	NA	12	188	1.20E-15	TRUE	IPR027417	P-loop containing nucleoside triphosphate hydrolase	HHX91536.1	37.4	187	98	5	13	185	2	183	6.30E-25	124.8	202	186	N/A	N/A		HHX91536.1 hypothetical protein [Paracoccus sp.]
`Fenrir Meg22_1012`	Meg22_1012_scaffold_2kb_scaffold_226_40	(35251..35856)	1	Lokiarchaeota	Lytic	PF17784.1	Sulfotransferase domain	201	SUPERFAMILY	SSF52540	NA	12	188	1.20E-15	TRUE	IPR027417	P-loop containing nucleoside triphosphate hydrolase	WP_125219850.1	38.8	183	97	4	10	180	4	183	4.80E-25	125.2	202	457	Proteobacteria	Methylomicrobium sp. wino1	2049332	WP_125219850.1 hypothetical protein [Methylomicrobium sp. wino1]
`Fenrir Meg22_1012`	Meg22_1012_scaffold_2kb_scaffold_226_40	(35251..35856)	1	Lokiarchaeota	Lytic	PF17784.1	Sulfotransferase domain	201	SUPERFAMILY	SSF52540	NA	12	188	1.20E-15	TRUE	IPR027417	P-loop containing nucleoside triphosphate hydrolase	MBA3551195.1	41.4	181	91	4	13	186	52	224	3.70E-25	125.6	202	226	N/A	N/A		MBA3551195.1 hypothetical protein [Patescibacteria group bacterium]
`Fenrir Meg22_1012`	Meg22_1012_scaffold_2kb_scaffold_226_40	(35251..35856)	1	Lokiarchaeota	Lytic	PF17784.1	Sulfotransferase domain	201	SUPERFAMILY	SSF52540	NA	12	188	1.20E-15	TRUE	IPR027417	P-loop containing nucleoside triphosphate hydrolase	HHM04769.1	40.8	179	92	3	13	180	6	181	1.70E-25	126.7	202	443	N/A	N/A		HHM04769.1 hypothetical protein [Gammaproteobacteria bacterium]
`Fenrir Meg22_1012`	Meg22_1012_scaffold_2kb_scaffold_226_40	(35251..35856)	1	Lokiarchaeota	Lytic	PF17784.1	Sulfotransferase domain	201	SUPERFAMILY	SSF52540	NA	12	188	1.20E-15	TRUE	IPR027417	P-loop containing nucleoside triphosphate hydrolase	ALP54080.1	40.6	180	91	5	13	180	9	184	1.20E-26	130.6	202	433	Proteobacteria	Candidatus Tenderia electrophaga	1748243	ALP54080.1 hypothetical protein Tel_13585 [Candidatus Tenderia electrophaga]
`Fenrir Meg22_1012`	Meg22_1012_scaffold_2kb_scaffold_226_40	(35251..35856)	1	Lokiarchaeota	Lytic	PF17784.1	Sulfotransferase domain	201	SUPERFAMILY	SSF52540	NA	12	188	1.20E-15	TRUE	IPR027417	P-loop containing nucleoside triphosphate hydrolase	NBO99654.1	42.8	173	86	5	13	182	2	164	8.00E-28	134.4	202	167	N/A	N/A		NBO99654.1 hypothetical protein [Proteobacteria bacterium]
`Fenrir Meg22_1012`	Meg22_1012_scaffold_2kb_scaffold_226_40	(35251..35856)	1	Lokiarchaeota	Lytic	PF17784.1	Sulfotransferase domain	201	SUPERFAMILY	SSF52540	NA	12	188	1.20E-15	TRUE	IPR027417	P-loop containing nucleoside triphosphate hydrolase	WP_104420094.1	41	188	96	4	13	188	2	186	7.20E-29	137.9	202	186	Bacteroidetes	Lewinella xylanilytica	1514080	WP_104420094.1 hypothetical protein [Lewinella xylanilytica]
`Fenrir Meg22_1012`	Meg22_1012_scaffold_2kb_scaffold_226_40	(35251..35856)	1	Lokiarchaeota	Lytic	PF17784.1	Sulfotransferase domain	201	SUPERFAMILY	SSF52540	NA	12	188	1.20E-15	TRUE	IPR027417	P-loop containing nucleoside triphosphate hydrolase	MAG95060.1	45.5	178	89	5	11	186	7	178	9.10E-32	147.5	202	280	N/A	N/A		MAG95060.1 hypothetical protein [Rhodospirillaceae bacterium]
`Fenrir Meg22_1012`	Meg22_1012_scaffold_2kb_scaffold_226_41	(35813..36208)	1	Lokiarchaeota	Lytic	None	hypothetical protein	NA	NA	NA	NA	NA	NA	NA	NA	NA	NA	NA	NA	NA	NA	NA	NA	NA	NA	NA	NA	NA	NA	NA	NA	NA	NA	NA
`Fenrir Meg22_1012`	Meg22_1012_scaffold_2kb_scaffold_226_42	(36211..37479)	-1	Lokiarchaeota	Lytic	K00754	bshA; L-malate glycosyltransferase [EC:2.4.1.-]	422	SUPERFAMILY	SSF53756	UDP-Glycosyltransferase/glycogen phosphorylase	3	335	6.28E-37	TRUE			WP_085169313.1	39.7	411	233	9	3	403	5	410	1.00E-80	311.2	423	421	Spirochaetes	Brachyspira hyodysenteriae	159	WP_085169313.1 glycosyltransferase [Brachyspira hyodysenteriae]
`Fenrir Meg22_1012`	Meg22_1012_scaffold_2kb_scaffold_226_42	(36211..37479)	-1	Lokiarchaeota	Lytic	K00754	bshA; L-malate glycosyltransferase [EC:2.4.1.-]	422	SUPERFAMILY	SSF53756	UDP-Glycosyltransferase/glycogen phosphorylase	3	335	6.28E-37	TRUE			WP_047117269.1	39.9	411	232	9	3	403	5	410	5.80E-81	312	423	421	Spirochaetes	Brachyspira hyodysenteriae	159	WP_047117269.1 glycosyltransferase [Brachyspira hyodysenteriae]
`Fenrir Meg22_1012`	Meg22_1012_scaffold_2kb_scaffold_226_42	(36211..37479)	-1	Lokiarchaeota	Lytic	K00754	bshA; L-malate glycosyltransferase [EC:2.4.1.-]	422	SUPERFAMILY	SSF53756	UDP-Glycosyltransferase/glycogen phosphorylase	3	335	6.28E-37	TRUE			WP_012672156.1	39.9	411	232	9	3	403	5	410	5.80E-81	312	423	421	Spirochaetes	Brachyspira hyodysenteriae;Brachyspira hyodysenteriae WA1	159;565034	WP_012672156.1 glycosyltransferase [Brachyspira hyodysenteriae]
`Fenrir Meg22_1012`	Meg22_1012_scaffold_2kb_scaffold_226_42	(36211..37479)	-1	Lokiarchaeota	Lytic	K00754	bshA; L-malate glycosyltransferase [EC:2.4.1.-]	422	SUPERFAMILY	SSF53756	UDP-Glycosyltransferase/glycogen phosphorylase	3	335	6.28E-37	TRUE			WP_047115456.1	39.9	411	232	9	3	403	5	410	4.50E-81	312.4	423	421	Spirochaetes	Brachyspira hyodysenteriae	159	WP_047115456.1 glycosyltransferase [Brachyspira hyodysenteriae]
`Fenrir Meg22_1012`	Meg22_1012_scaffold_2kb_scaffold_226_42	(36211..37479)	-1	Lokiarchaeota	Lytic	K00754	bshA; L-malate glycosyltransferase [EC:2.4.1.-]	422	SUPERFAMILY	SSF53756	UDP-Glycosyltransferase/glycogen phosphorylase	3	335	6.28E-37	TRUE			WP_047104795.1	39.9	411	232	9	3	403	5	410	3.40E-81	312.8	423	421	Spirochaetes	Brachyspira hyodysenteriae	159	WP_047104795.1 glycosyltransferase [Brachyspira hyodysenteriae]
`Fenrir Meg22_1012`	Meg22_1012_scaffold_2kb_scaffold_226_42	(36211..37479)	-1	Lokiarchaeota	Lytic	K00754	bshA; L-malate glycosyltransferase [EC:2.4.1.-]	422	SUPERFAMILY	SSF53756	UDP-Glycosyltransferase/glycogen phosphorylase	3	335	6.28E-37	TRUE			WP_047116535.1	40.5	415	224	10	3	403	5	410	1.50E-81	313.9	423	421	Spirochaetes	Brachyspira hyodysenteriae	159	WP_047116535.1 glycosyltransferase [Brachyspira hyodysenteriae]
`Fenrir Meg22_1012`	Meg22_1012_scaffold_2kb_scaffold_226_42	(36211..37479)	-1	Lokiarchaeota	Lytic	K00754	bshA; L-malate glycosyltransferase [EC:2.4.1.-]	422	SUPERFAMILY	SSF53756	UDP-Glycosyltransferase/glycogen phosphorylase	3	335	6.28E-37	TRUE			OGN04114.1	39.4	442	240	8	3	419	9	447	3.10E-82	316.2	423	452	Candidatus Yanofskybacteria	Candidatus Yanofskybacteria bacterium RIFCSPHIGHO2_01_FULL_44_17	1802668	OGN04114.1 hypothetical protein A2831_02275 [Candidatus Yanofskybacteria bacterium RIFCSPHIGHO2_01_FULL_44_17]
`Fenrir Meg22_1012`	Meg22_1012_scaffold_2kb_scaffold_226_42	(36211..37479)	-1	Lokiarchaeota	Lytic	K00754	bshA; L-malate glycosyltransferase [EC:2.4.1.-]	422	SUPERFAMILY	SSF53756	UDP-Glycosyltransferase/glycogen phosphorylase	3	335	6.28E-37	TRUE			MBA3047748.1	41.7	439	228	9	3	416	11	446	1.10E-87	334.3	423	451	N/A	N/A		MBA3047748.1 glycosyltransferase family 4 protein [Candidatus Falkowbacteria bacterium]
`Fenrir Meg22_1012`	Meg22_1012_scaffold_2kb_scaffold_226_42	(36211..37479)	-1	Lokiarchaeota	Lytic	K00754	bshA; L-malate glycosyltransferase [EC:2.4.1.-]	422	SUPERFAMILY	SSF53756	UDP-Glycosyltransferase/glycogen phosphorylase	3	335	6.28E-37	TRUE			KKQ77607.1	41.6	440	229	7	3	416	8	445	3.10E-90	342.8	423	446	0;Candidatus Zambryskibacteria	Parcubacteria group bacterium GW2011_GWA1_38_7;Candidatus Zambryskibacteria bacterium RIFCSPHIGHO2_01_FULL_39_63;Candidatus Zambryskibacteria bacterium RIFCSPHIGHO2_02_FULL_39_19;Candidatus Zambryskibacteria bacterium RIFCSPHIGHO2_12_FULL_39_21;Candidatus Zambryskibacteria bacterium RIFCSPLOWO2_01_FULL_39_39	1618783;1802733;1802746;1802752;1802758	KKQ77607.1 Glycosyl transferase, group 1-like protein [Parcubacteria group bacterium GW2011_GWA1_38_7]
`Fenrir Meg22_1012`	Meg22_1012_scaffold_2kb_scaffold_226_42	(36211..37479)	-1	Lokiarchaeota	Lytic	K00754	bshA; L-malate glycosyltransferase [EC:2.4.1.-]	422	SUPERFAMILY	SSF53756	UDP-Glycosyltransferase/glycogen phosphorylase	3	335	6.28E-37	TRUE			PJE67693.1	42.6	444	225	9	3	420	10	449	6.70E-93	351.7	423	470	Candidatus Shapirobacteria	Candidatus Shapirobacteria bacterium CG10_big_fil_rev_8_21_14_0_10_40_9	1974888	PJE67693.1 glycosyl transferase, group 1-like protein [Candidatus Shapirobacteria bacterium CG10_big_fil_rev_8_21_14_0_10_40_9]
`Fenrir Meg22_1012`	Meg22_1012_scaffold_2kb_scaffold_226_42	(36211..37479)	-1	Lokiarchaeota	Lytic	K00754	bshA; L-malate glycosyltransferase [EC:2.4.1.-]	422	Gene3D	G3DSA:3.40.50.2000	Glycogen Phosphorylase B;	40	333	4.80E-31	TRUE			WP_085169313.1	39.7	411	233	9	3	403	5	410	1.00E-80	311.2	423	421	Spirochaetes	Brachyspira hyodysenteriae	159	WP_085169313.1 glycosyltransferase [Brachyspira hyodysenteriae]
`Fenrir Meg22_1012`	Meg22_1012_scaffold_2kb_scaffold_226_42	(36211..37479)	-1	Lokiarchaeota	Lytic	K00754	bshA; L-malate glycosyltransferase [EC:2.4.1.-]	422	Gene3D	G3DSA:3.40.50.2000	Glycogen Phosphorylase B;	40	333	4.80E-31	TRUE			WP_047117269.1	39.9	411	232	9	3	403	5	410	5.80E-81	312	423	421	Spirochaetes	Brachyspira hyodysenteriae	159	WP_047117269.1 glycosyltransferase [Brachyspira hyodysenteriae]
`Fenrir Meg22_1012`	Meg22_1012_scaffold_2kb_scaffold_226_42	(36211..37479)	-1	Lokiarchaeota	Lytic	K00754	bshA; L-malate glycosyltransferase [EC:2.4.1.-]	422	Gene3D	G3DSA:3.40.50.2000	Glycogen Phosphorylase B;	40	333	4.80E-31	TRUE			WP_012672156.1	39.9	411	232	9	3	403	5	410	5.80E-81	312	423	421	Spirochaetes	Brachyspira hyodysenteriae;Brachyspira hyodysenteriae WA1	159;565034	WP_012672156.1 glycosyltransferase [Brachyspira hyodysenteriae]
`Fenrir Meg22_1012`	Meg22_1012_scaffold_2kb_scaffold_226_42	(36211..37479)	-1	Lokiarchaeota	Lytic	K00754	bshA; L-malate glycosyltransferase [EC:2.4.1.-]	422	Gene3D	G3DSA:3.40.50.2000	Glycogen Phosphorylase B;	40	333	4.80E-31	TRUE			WP_047115456.1	39.9	411	232	9	3	403	5	410	4.50E-81	312.4	423	421	Spirochaetes	Brachyspira hyodysenteriae	159	WP_047115456.1 glycosyltransferase [Brachyspira hyodysenteriae]
`Fenrir Meg22_1012`	Meg22_1012_scaffold_2kb_scaffold_226_42	(36211..37479)	-1	Lokiarchaeota	Lytic	K00754	bshA; L-malate glycosyltransferase [EC:2.4.1.-]	422	Gene3D	G3DSA:3.40.50.2000	Glycogen Phosphorylase B;	40	333	4.80E-31	TRUE			WP_047104795.1	39.9	411	232	9	3	403	5	410	3.40E-81	312.8	423	421	Spirochaetes	Brachyspira hyodysenteriae	159	WP_047104795.1 glycosyltransferase [Brachyspira hyodysenteriae]
`Fenrir Meg22_1012`	Meg22_1012_scaffold_2kb_scaffold_226_42	(36211..37479)	-1	Lokiarchaeota	Lytic	K00754	bshA; L-malate glycosyltransferase [EC:2.4.1.-]	422	Gene3D	G3DSA:3.40.50.2000	Glycogen Phosphorylase B;	40	333	4.80E-31	TRUE			WP_047116535.1	40.5	415	224	10	3	403	5	410	1.50E-81	313.9	423	421	Spirochaetes	Brachyspira hyodysenteriae	159	WP_047116535.1 glycosyltransferase [Brachyspira hyodysenteriae]
`Fenrir Meg22_1012`	Meg22_1012_scaffold_2kb_scaffold_226_42	(36211..37479)	-1	Lokiarchaeota	Lytic	K00754	bshA; L-malate glycosyltransferase [EC:2.4.1.-]	422	Gene3D	G3DSA:3.40.50.2000	Glycogen Phosphorylase B;	40	333	4.80E-31	TRUE			OGN04114.1	39.4	442	240	8	3	419	9	447	3.10E-82	316.2	423	452	Candidatus Yanofskybacteria	Candidatus Yanofskybacteria bacterium RIFCSPHIGHO2_01_FULL_44_17	1802668	OGN04114.1 hypothetical protein A2831_02275 [Candidatus Yanofskybacteria bacterium RIFCSPHIGHO2_01_FULL_44_17]
`Fenrir Meg22_1012`	Meg22_1012_scaffold_2kb_scaffold_226_42	(36211..37479)	-1	Lokiarchaeota	Lytic	K00754	bshA; L-malate glycosyltransferase [EC:2.4.1.-]	422	Gene3D	G3DSA:3.40.50.2000	Glycogen Phosphorylase B;	40	333	4.80E-31	TRUE			MBA3047748.1	41.7	439	228	9	3	416	11	446	1.10E-87	334.3	423	451	N/A	N/A		MBA3047748.1 glycosyltransferase family 4 protein [Candidatus Falkowbacteria bacterium]
`Fenrir Meg22_1012`	Meg22_1012_scaffold_2kb_scaffold_226_42	(36211..37479)	-1	Lokiarchaeota	Lytic	K00754	bshA; L-malate glycosyltransferase [EC:2.4.1.-]	422	Gene3D	G3DSA:3.40.50.2000	Glycogen Phosphorylase B;	40	333	4.80E-31	TRUE			KKQ77607.1	41.6	440	229	7	3	416	8	445	3.10E-90	342.8	423	446	0;Candidatus Zambryskibacteria	Parcubacteria group bacterium GW2011_GWA1_38_7;Candidatus Zambryskibacteria bacterium RIFCSPHIGHO2_01_FULL_39_63;Candidatus Zambryskibacteria bacterium RIFCSPHIGHO2_02_FULL_39_19;Candidatus Zambryskibacteria bacterium RIFCSPHIGHO2_12_FULL_39_21;Candidatus Zambryskibacteria bacterium RIFCSPLOWO2_01_FULL_39_39	1618783;1802733;1802746;1802752;1802758	KKQ77607.1 Glycosyl transferase, group 1-like protein [Parcubacteria group bacterium GW2011_GWA1_38_7]
`Fenrir Meg22_1012`	Meg22_1012_scaffold_2kb_scaffold_226_42	(36211..37479)	-1	Lokiarchaeota	Lytic	K00754	bshA; L-malate glycosyltransferase [EC:2.4.1.-]	422	Gene3D	G3DSA:3.40.50.2000	Glycogen Phosphorylase B;	40	333	4.80E-31	TRUE			PJE67693.1	42.6	444	225	9	3	420	10	449	6.70E-93	351.7	423	470	Candidatus Shapirobacteria	Candidatus Shapirobacteria bacterium CG10_big_fil_rev_8_21_14_0_10_40_9	1974888	PJE67693.1 glycosyl transferase, group 1-like protein [Candidatus Shapirobacteria bacterium CG10_big_fil_rev_8_21_14_0_10_40_9]
`Fenrir Meg22_1012`	Meg22_1012_scaffold_2kb_scaffold_226_42	(36211..37479)	-1	Lokiarchaeota	Lytic	K00754	bshA; L-malate glycosyltransferase [EC:2.4.1.-]	422	Gene3D	G3DSA:3.40.50.2000	Glycogen Phosphorylase B;	154	326	4.80E-31	TRUE			WP_085169313.1	39.7	411	233	9	3	403	5	410	1.00E-80	311.2	423	421	Spirochaetes	Brachyspira hyodysenteriae	159	WP_085169313.1 glycosyltransferase [Brachyspira hyodysenteriae]
`Fenrir Meg22_1012`	Meg22_1012_scaffold_2kb_scaffold_226_42	(36211..37479)	-1	Lokiarchaeota	Lytic	K00754	bshA; L-malate glycosyltransferase [EC:2.4.1.-]	422	Gene3D	G3DSA:3.40.50.2000	Glycogen Phosphorylase B;	154	326	4.80E-31	TRUE			WP_047117269.1	39.9	411	232	9	3	403	5	410	5.80E-81	312	423	421	Spirochaetes	Brachyspira hyodysenteriae	159	WP_047117269.1 glycosyltransferase [Brachyspira hyodysenteriae]
`Fenrir Meg22_1012`	Meg22_1012_scaffold_2kb_scaffold_226_42	(36211..37479)	-1	Lokiarchaeota	Lytic	K00754	bshA; L-malate glycosyltransferase [EC:2.4.1.-]	422	Gene3D	G3DSA:3.40.50.2000	Glycogen Phosphorylase B;	154	326	4.80E-31	TRUE			WP_012672156.1	39.9	411	232	9	3	403	5	410	5.80E-81	312	423	421	Spirochaetes	Brachyspira hyodysenteriae;Brachyspira hyodysenteriae WA1	159;565034	WP_012672156.1 glycosyltransferase [Brachyspira hyodysenteriae]
`Fenrir Meg22_1012`	Meg22_1012_scaffold_2kb_scaffold_226_42	(36211..37479)	-1	Lokiarchaeota	Lytic	K00754	bshA; L-malate glycosyltransferase [EC:2.4.1.-]	422	Gene3D	G3DSA:3.40.50.2000	Glycogen Phosphorylase B;	154	326	4.80E-31	TRUE			WP_047115456.1	39.9	411	232	9	3	403	5	410	4.50E-81	312.4	423	421	Spirochaetes	Brachyspira hyodysenteriae	159	WP_047115456.1 glycosyltransferase [Brachyspira hyodysenteriae]
`Fenrir Meg22_1012`	Meg22_1012_scaffold_2kb_scaffold_226_42	(36211..37479)	-1	Lokiarchaeota	Lytic	K00754	bshA; L-malate glycosyltransferase [EC:2.4.1.-]	422	Gene3D	G3DSA:3.40.50.2000	Glycogen Phosphorylase B;	154	326	4.80E-31	TRUE			WP_047104795.1	39.9	411	232	9	3	403	5	410	3.40E-81	312.8	423	421	Spirochaetes	Brachyspira hyodysenteriae	159	WP_047104795.1 glycosyltransferase [Brachyspira hyodysenteriae]
`Fenrir Meg22_1012`	Meg22_1012_scaffold_2kb_scaffold_226_42	(36211..37479)	-1	Lokiarchaeota	Lytic	K00754	bshA; L-malate glycosyltransferase [EC:2.4.1.-]	422	Gene3D	G3DSA:3.40.50.2000	Glycogen Phosphorylase B;	154	326	4.80E-31	TRUE			WP_047116535.1	40.5	415	224	10	3	403	5	410	1.50E-81	313.9	423	421	Spirochaetes	Brachyspira hyodysenteriae	159	WP_047116535.1 glycosyltransferase [Brachyspira hyodysenteriae]
`Fenrir Meg22_1012`	Meg22_1012_scaffold_2kb_scaffold_226_42	(36211..37479)	-1	Lokiarchaeota	Lytic	K00754	bshA; L-malate glycosyltransferase [EC:2.4.1.-]	422	Gene3D	G3DSA:3.40.50.2000	Glycogen Phosphorylase B;	154	326	4.80E-31	TRUE			OGN04114.1	39.4	442	240	8	3	419	9	447	3.10E-82	316.2	423	452	Candidatus Yanofskybacteria	Candidatus Yanofskybacteria bacterium RIFCSPHIGHO2_01_FULL_44_17	1802668	OGN04114.1 hypothetical protein A2831_02275 [Candidatus Yanofskybacteria bacterium RIFCSPHIGHO2_01_FULL_44_17]
`Fenrir Meg22_1012`	Meg22_1012_scaffold_2kb_scaffold_226_42	(36211..37479)	-1	Lokiarchaeota	Lytic	K00754	bshA; L-malate glycosyltransferase [EC:2.4.1.-]	422	Gene3D	G3DSA:3.40.50.2000	Glycogen Phosphorylase B;	154	326	4.80E-31	TRUE			MBA3047748.1	41.7	439	228	9	3	416	11	446	1.10E-87	334.3	423	451	N/A	N/A		MBA3047748.1 glycosyltransferase family 4 protein [Candidatus Falkowbacteria bacterium]
`Fenrir Meg22_1012`	Meg22_1012_scaffold_2kb_scaffold_226_42	(36211..37479)	-1	Lokiarchaeota	Lytic	K00754	bshA; L-malate glycosyltransferase [EC:2.4.1.-]	422	Gene3D	G3DSA:3.40.50.2000	Glycogen Phosphorylase B;	154	326	4.80E-31	TRUE			KKQ77607.1	41.6	440	229	7	3	416	8	445	3.10E-90	342.8	423	446	0;Candidatus Zambryskibacteria	Parcubacteria group bacterium GW2011_GWA1_38_7;Candidatus Zambryskibacteria bacterium RIFCSPHIGHO2_01_FULL_39_63;Candidatus Zambryskibacteria bacterium RIFCSPHIGHO2_02_FULL_39_19;Candidatus Zambryskibacteria bacterium RIFCSPHIGHO2_12_FULL_39_21;Candidatus Zambryskibacteria bacterium RIFCSPLOWO2_01_FULL_39_39	1618783;1802733;1802746;1802752;1802758	KKQ77607.1 Glycosyl transferase, group 1-like protein [Parcubacteria group bacterium GW2011_GWA1_38_7]
`Fenrir Meg22_1012`	Meg22_1012_scaffold_2kb_scaffold_226_42	(36211..37479)	-1	Lokiarchaeota	Lytic	K00754	bshA; L-malate glycosyltransferase [EC:2.4.1.-]	422	Gene3D	G3DSA:3.40.50.2000	Glycogen Phosphorylase B;	154	326	4.80E-31	TRUE			PJE67693.1	42.6	444	225	9	3	420	10	449	6.70E-93	351.7	423	470	Candidatus Shapirobacteria	Candidatus Shapirobacteria bacterium CG10_big_fil_rev_8_21_14_0_10_40_9	1974888	PJE67693.1 glycosyl transferase, group 1-like protein [Candidatus Shapirobacteria bacterium CG10_big_fil_rev_8_21_14_0_10_40_9]
`Fenrir Meg22_1012`	Meg22_1012_scaffold_2kb_scaffold_226_42	(36211..37479)	-1	Lokiarchaeota	Lytic	K00754	bshA; L-malate glycosyltransferase [EC:2.4.1.-]	422	Pfam	PF00534	Glycosyl transferases group 1	162	320	9.10E-21	TRUE	IPR001296	Glycosyl transferase, family 1	WP_085169313.1	39.7	411	233	9	3	403	5	410	1.00E-80	311.2	423	421	Spirochaetes	Brachyspira hyodysenteriae	159	WP_085169313.1 glycosyltransferase [Brachyspira hyodysenteriae]
`Fenrir Meg22_1012`	Meg22_1012_scaffold_2kb_scaffold_226_42	(36211..37479)	-1	Lokiarchaeota	Lytic	K00754	bshA; L-malate glycosyltransferase [EC:2.4.1.-]	422	Pfam	PF00534	Glycosyl transferases group 1	162	320	9.10E-21	TRUE	IPR001296	Glycosyl transferase, family 1	WP_047117269.1	39.9	411	232	9	3	403	5	410	5.80E-81	312	423	421	Spirochaetes	Brachyspira hyodysenteriae	159	WP_047117269.1 glycosyltransferase [Brachyspira hyodysenteriae]
`Fenrir Meg22_1012`	Meg22_1012_scaffold_2kb_scaffold_226_42	(36211..37479)	-1	Lokiarchaeota	Lytic	K00754	bshA; L-malate glycosyltransferase [EC:2.4.1.-]	422	Pfam	PF00534	Glycosyl transferases group 1	162	320	9.10E-21	TRUE	IPR001296	Glycosyl transferase, family 1	WP_012672156.1	39.9	411	232	9	3	403	5	410	5.80E-81	312	423	421	Spirochaetes	Brachyspira hyodysenteriae;Brachyspira hyodysenteriae WA1	159;565034	WP_012672156.1 glycosyltransferase [Brachyspira hyodysenteriae]
`Fenrir Meg22_1012`	Meg22_1012_scaffold_2kb_scaffold_226_42	(36211..37479)	-1	Lokiarchaeota	Lytic	K00754	bshA; L-malate glycosyltransferase [EC:2.4.1.-]	422	Pfam	PF00534	Glycosyl transferases group 1	162	320	9.10E-21	TRUE	IPR001296	Glycosyl transferase, family 1	WP_047115456.1	39.9	411	232	9	3	403	5	410	4.50E-81	312.4	423	421	Spirochaetes	Brachyspira hyodysenteriae	159	WP_047115456.1 glycosyltransferase [Brachyspira hyodysenteriae]
`Fenrir Meg22_1012`	Meg22_1012_scaffold_2kb_scaffold_226_42	(36211..37479)	-1	Lokiarchaeota	Lytic	K00754	bshA; L-malate glycosyltransferase [EC:2.4.1.-]	422	Pfam	PF00534	Glycosyl transferases group 1	162	320	9.10E-21	TRUE	IPR001296	Glycosyl transferase, family 1	WP_047104795.1	39.9	411	232	9	3	403	5	410	3.40E-81	312.8	423	421	Spirochaetes	Brachyspira hyodysenteriae	159	WP_047104795.1 glycosyltransferase [Brachyspira hyodysenteriae]
`Fenrir Meg22_1012`	Meg22_1012_scaffold_2kb_scaffold_226_42	(36211..37479)	-1	Lokiarchaeota	Lytic	K00754	bshA; L-malate glycosyltransferase [EC:2.4.1.-]	422	Pfam	PF00534	Glycosyl transferases group 1	162	320	9.10E-21	TRUE	IPR001296	Glycosyl transferase, family 1	WP_047116535.1	40.5	415	224	10	3	403	5	410	1.50E-81	313.9	423	421	Spirochaetes	Brachyspira hyodysenteriae	159	WP_047116535.1 glycosyltransferase [Brachyspira hyodysenteriae]
`Fenrir Meg22_1012`	Meg22_1012_scaffold_2kb_scaffold_226_42	(36211..37479)	-1	Lokiarchaeota	Lytic	K00754	bshA; L-malate glycosyltransferase [EC:2.4.1.-]	422	Pfam	PF00534	Glycosyl transferases group 1	162	320	9.10E-21	TRUE	IPR001296	Glycosyl transferase, family 1	OGN04114.1	39.4	442	240	8	3	419	9	447	3.10E-82	316.2	423	452	Candidatus Yanofskybacteria	Candidatus Yanofskybacteria bacterium RIFCSPHIGHO2_01_FULL_44_17	1802668	OGN04114.1 hypothetical protein A2831_02275 [Candidatus Yanofskybacteria bacterium RIFCSPHIGHO2_01_FULL_44_17]
`Fenrir Meg22_1012`	Meg22_1012_scaffold_2kb_scaffold_226_42	(36211..37479)	-1	Lokiarchaeota	Lytic	K00754	bshA; L-malate glycosyltransferase [EC:2.4.1.-]	422	Pfam	PF00534	Glycosyl transferases group 1	162	320	9.10E-21	TRUE	IPR001296	Glycosyl transferase, family 1	MBA3047748.1	41.7	439	228	9	3	416	11	446	1.10E-87	334.3	423	451	N/A	N/A		MBA3047748.1 glycosyltransferase family 4 protein [Candidatus Falkowbacteria bacterium]
`Fenrir Meg22_1012`	Meg22_1012_scaffold_2kb_scaffold_226_42	(36211..37479)	-1	Lokiarchaeota	Lytic	K00754	bshA; L-malate glycosyltransferase [EC:2.4.1.-]	422	Pfam	PF00534	Glycosyl transferases group 1	162	320	9.10E-21	TRUE	IPR001296	Glycosyl transferase, family 1	KKQ77607.1	41.6	440	229	7	3	416	8	445	3.10E-90	342.8	423	446	0;Candidatus Zambryskibacteria	Parcubacteria group bacterium GW2011_GWA1_38_7;Candidatus Zambryskibacteria bacterium RIFCSPHIGHO2_01_FULL_39_63;Candidatus Zambryskibacteria bacterium RIFCSPHIGHO2_02_FULL_39_19;Candidatus Zambryskibacteria bacterium RIFCSPHIGHO2_12_FULL_39_21;Candidatus Zambryskibacteria bacterium RIFCSPLOWO2_01_FULL_39_39	1618783;1802733;1802746;1802752;1802758	KKQ77607.1 Glycosyl transferase, group 1-like protein [Parcubacteria group bacterium GW2011_GWA1_38_7]
`Fenrir Meg22_1012`	Meg22_1012_scaffold_2kb_scaffold_226_42	(36211..37479)	-1	Lokiarchaeota	Lytic	K00754	bshA; L-malate glycosyltransferase [EC:2.4.1.-]	422	Pfam	PF00534	Glycosyl transferases group 1	162	320	9.10E-21	TRUE	IPR001296	Glycosyl transferase, family 1	PJE67693.1	42.6	444	225	9	3	420	10	449	6.70E-93	351.7	423	470	Candidatus Shapirobacteria	Candidatus Shapirobacteria bacterium CG10_big_fil_rev_8_21_14_0_10_40_9	1974888	PJE67693.1 glycosyl transferase, group 1-like protein [Candidatus Shapirobacteria bacterium CG10_big_fil_rev_8_21_14_0_10_40_9]
`Fenrir Meg22_1012`	Meg22_1012_scaffold_2kb_scaffold_226_43	(37472..38641)	-1	Lokiarchaeota	Lytic	K18827	wbdD, wbbD; O-antigen chain-terminating methyltransferase [EC:2.1.1.- 2.1.1.294 2.7.1.181]	389	SUPERFAMILY	SSF53335	S-adenosyl-L-methionine-dependent methyltransferases	50	253	3.00E-32	TRUE	IPR029063	S-adenosyl-L-methionine-dependent methyltransferase	PLY06380.1	33.5	325	193	6	2	316	7	318	1.40E-41	181	390	393	Proteobacteria	Arcobacter sp.	1872629	PLY06380.1 hypothetical protein C0625_09585 [Arcobacter sp.]
`Fenrir Meg22_1012`	Meg22_1012_scaffold_2kb_scaffold_226_43	(37472..38641)	-1	Lokiarchaeota	Lytic	K18827	wbdD, wbbD; O-antigen chain-terminating methyltransferase [EC:2.1.1.- 2.1.1.294 2.7.1.181]	389	SUPERFAMILY	SSF53335	S-adenosyl-L-methionine-dependent methyltransferases	50	253	3.00E-32	TRUE	IPR029063	S-adenosyl-L-methionine-dependent methyltransferase	NLD36595.1	40.9	296	165	4	1	288	7	300	1.80E-60	243.8	390	308	N/A	N/A		NLD36595.1 class I SAM-dependent methyltransferase [Desulfatiglans sp.]
`Fenrir Meg22_1012`	Meg22_1012_scaffold_2kb_scaffold_226_43	(37472..38641)	-1	Lokiarchaeota	Lytic	K18827	wbdD, wbbD; O-antigen chain-terminating methyltransferase [EC:2.1.1.- 2.1.1.294 2.7.1.181]	389	SUPERFAMILY	SSF53335	S-adenosyl-L-methionine-dependent methyltransferases	50	253	3.00E-32	TRUE	IPR029063	S-adenosyl-L-methionine-dependent methyltransferase	KIE43359.1	38.8	348	199	6	54	389	3	348	5.80E-67	265.4	390	348	Proteobacteria	Geobacter soli	1510391	KIE43359.1 hypothetical protein SE37_12320 [Geobacter soli]
`Fenrir Meg22_1012`	Meg22_1012_scaffold_2kb_scaffold_226_43	(37472..38641)	-1	Lokiarchaeota	Lytic	K18827	wbdD, wbbD; O-antigen chain-terminating methyltransferase [EC:2.1.1.- 2.1.1.294 2.7.1.181]	389	SUPERFAMILY	SSF53335	S-adenosyl-L-methionine-dependent methyltransferases	50	253	3.00E-32	TRUE	IPR029063	S-adenosyl-L-methionine-dependent methyltransferase	WP_108102571.1	37.3	397	236	5	2	386	5	400	1.10E-68	271.2	390	404	Proteobacteria	Geobacter sp. DSM 2909	2135459	WP_108102571.1 class I SAM-dependent methyltransferase [Geobacter sp. DSM 2909]
`Fenrir Meg22_1012`	Meg22_1012_scaffold_2kb_scaffold_226_43	(37472..38641)	-1	Lokiarchaeota	Lytic	K18827	wbdD, wbbD; O-antigen chain-terminating methyltransferase [EC:2.1.1.- 2.1.1.294 2.7.1.181]	389	SUPERFAMILY	SSF53335	S-adenosyl-L-methionine-dependent methyltransferases	50	253	3.00E-32	TRUE	IPR029063	S-adenosyl-L-methionine-dependent methyltransferase	HDY77193.1	42.5	398	167	9	3	389	4	350	2.10E-77	300.1	390	350	N/A	N/A		HDY77193.1 class I SAM-dependent methyltransferase [archaeon]
`Fenrir Meg22_1012`	Meg22_1012_scaffold_2kb_scaffold_226_43	(37472..38641)	-1	Lokiarchaeota	Lytic	K18827	wbdD, wbbD; O-antigen chain-terminating methyltransferase [EC:2.1.1.- 2.1.1.294 2.7.1.181]	389	SUPERFAMILY	SSF53335	S-adenosyl-L-methionine-dependent methyltransferases	50	253	3.00E-32	TRUE	IPR029063	S-adenosyl-L-methionine-dependent methyltransferase	WP_082021158.1	38	403	234	7	1	389	4	404	3.30E-78	302.8	390	404	Proteobacteria	Geobacter soli	1510391	WP_082021158.1 class I SAM-dependent methyltransferase [Geobacter soli]
`Fenrir Meg22_1012`	Meg22_1012_scaffold_2kb_scaffold_226_43	(37472..38641)	-1	Lokiarchaeota	Lytic	K18827	wbdD, wbbD; O-antigen chain-terminating methyltransferase [EC:2.1.1.- 2.1.1.294 2.7.1.181]	389	SUPERFAMILY	SSF53335	S-adenosyl-L-methionine-dependent methyltransferases	50	253	3.00E-32	TRUE	IPR029063	S-adenosyl-L-methionine-dependent methyltransferase	KKQ77606.1	40.1	401	223	6	1	387	1	398	3.90E-79	305.8	390	401	0;Candidatus Zambryskibacteria	Parcubacteria group bacterium GW2011_GWA1_38_7;Candidatus Zambryskibacteria bacterium RIFCSPHIGHO2_01_FULL_39_63;Candidatus Zambryskibacteria bacterium RIFCSPHIGHO2_02_FULL_39_19;Candidatus Zambryskibacteria bacterium RIFCSPHIGHO2_12_FULL_39_21;Candidatus Zambryskibacteria bacterium RIFCSPLOWO2_01_FULL_39_39	1618783;1802733;1802746;1802752;1802758	KKQ77606.1 Methyltransferase type 12 [Parcubacteria group bacterium GW2011_GWA1_38_7]
`Fenrir Meg22_1012`	Meg22_1012_scaffold_2kb_scaffold_226_43	(37472..38641)	-1	Lokiarchaeota	Lytic	K18827	wbdD, wbbD; O-antigen chain-terminating methyltransferase [EC:2.1.1.- 2.1.1.294 2.7.1.181]	389	SUPERFAMILY	SSF53335	S-adenosyl-L-methionine-dependent methyltransferases	50	253	3.00E-32	TRUE	IPR029063	S-adenosyl-L-methionine-dependent methyltransferase	HEC98962.1	41	400	220	6	2	386	8	406	3.90E-79	305.8	390	417	N/A	N/A		HEC98962.1 class I SAM-dependent methyltransferase [Proteobacteria bacterium]
`Fenrir Meg22_1012`	Meg22_1012_scaffold_2kb_scaffold_226_43	(37472..38641)	-1	Lokiarchaeota	Lytic	K18827	wbdD, wbbD; O-antigen chain-terminating methyltransferase [EC:2.1.1.- 2.1.1.294 2.7.1.181]	389	SUPERFAMILY	SSF53335	S-adenosyl-L-methionine-dependent methyltransferases	50	253	3.00E-32	TRUE	IPR029063	S-adenosyl-L-methionine-dependent methyltransferase	OPY61697.1	44	400	208	6	3	387	9	407	1.00E-87	334.3	390	414	Firmicutes	Pelotomaculum sp. PtaU1.Bin065	1811696	OPY61697.1 putative S-adenosylmethionine-dependent methyltransferase [Pelotomaculum sp. PtaU1.Bin065]
`Fenrir Meg22_1012`	Meg22_1012_scaffold_2kb_scaffold_226_43	(37472..38641)	-1	Lokiarchaeota	Lytic	K18827	wbdD, wbbD; O-antigen chain-terminating methyltransferase [EC:2.1.1.- 2.1.1.294 2.7.1.181]	389	SUPERFAMILY	SSF53335	S-adenosyl-L-methionine-dependent methyltransferases	50	253	3.00E-32	TRUE	IPR029063	S-adenosyl-L-methionine-dependent methyltransferase	WP_066221122.1	45.2	403	205	7	1	389	11	411	4.70E-93	352.1	390	808	Proteobacteria	Arcobacter cryaerophilus	28198	WP_066221122.1 methyltransferase domain-containing protein [Arcobacter cryaerophilus]
`Fenrir Meg22_1012`	Meg22_1012_scaffold_2kb_scaffold_226_43	(37472..38641)	-1	Lokiarchaeota	Lytic	K18827	wbdD, wbbD; O-antigen chain-terminating methyltransferase [EC:2.1.1.- 2.1.1.294 2.7.1.181]	389	Gene3D	G3DSA:3.40.50.150	Vaccinia Virus protein VP39	72	251	1.10E-35	TRUE			PLY06380.1	33.5	325	193	6	2	316	7	318	1.40E-41	181	390	393	Proteobacteria	Arcobacter sp.	1872629	PLY06380.1 hypothetical protein C0625_09585 [Arcobacter sp.]
`Fenrir Meg22_1012`	Meg22_1012_scaffold_2kb_scaffold_226_43	(37472..38641)	-1	Lokiarchaeota	Lytic	K18827	wbdD, wbbD; O-antigen chain-terminating methyltransferase [EC:2.1.1.- 2.1.1.294 2.7.1.181]	389	Gene3D	G3DSA:3.40.50.150	Vaccinia Virus protein VP39	72	251	1.10E-35	TRUE			NLD36595.1	40.9	296	165	4	1	288	7	300	1.80E-60	243.8	390	308	N/A	N/A		NLD36595.1 class I SAM-dependent methyltransferase [Desulfatiglans sp.]
`Fenrir Meg22_1012`	Meg22_1012_scaffold_2kb_scaffold_226_43	(37472..38641)	-1	Lokiarchaeota	Lytic	K18827	wbdD, wbbD; O-antigen chain-terminating methyltransferase [EC:2.1.1.- 2.1.1.294 2.7.1.181]	389	Gene3D	G3DSA:3.40.50.150	Vaccinia Virus protein VP39	72	251	1.10E-35	TRUE			KIE43359.1	38.8	348	199	6	54	389	3	348	5.80E-67	265.4	390	348	Proteobacteria	Geobacter soli	1510391	KIE43359.1 hypothetical protein SE37_12320 [Geobacter soli]
`Fenrir Meg22_1012`	Meg22_1012_scaffold_2kb_scaffold_226_43	(37472..38641)	-1	Lokiarchaeota	Lytic	K18827	wbdD, wbbD; O-antigen chain-terminating methyltransferase [EC:2.1.1.- 2.1.1.294 2.7.1.181]	389	Gene3D	G3DSA:3.40.50.150	Vaccinia Virus protein VP39	72	251	1.10E-35	TRUE			WP_108102571.1	37.3	397	236	5	2	386	5	400	1.10E-68	271.2	390	404	Proteobacteria	Geobacter sp. DSM 2909	2135459	WP_108102571.1 class I SAM-dependent methyltransferase [Geobacter sp. DSM 2909]
`Fenrir Meg22_1012`	Meg22_1012_scaffold_2kb_scaffold_226_43	(37472..38641)	-1	Lokiarchaeota	Lytic	K18827	wbdD, wbbD; O-antigen chain-terminating methyltransferase [EC:2.1.1.- 2.1.1.294 2.7.1.181]	389	Gene3D	G3DSA:3.40.50.150	Vaccinia Virus protein VP39	72	251	1.10E-35	TRUE			HDY77193.1	42.5	398	167	9	3	389	4	350	2.10E-77	300.1	390	350	N/A	N/A		HDY77193.1 class I SAM-dependent methyltransferase [archaeon]
`Fenrir Meg22_1012`	Meg22_1012_scaffold_2kb_scaffold_226_43	(37472..38641)	-1	Lokiarchaeota	Lytic	K18827	wbdD, wbbD; O-antigen chain-terminating methyltransferase [EC:2.1.1.- 2.1.1.294 2.7.1.181]	389	Gene3D	G3DSA:3.40.50.150	Vaccinia Virus protein VP39	72	251	1.10E-35	TRUE			WP_082021158.1	38	403	234	7	1	389	4	404	3.30E-78	302.8	390	404	Proteobacteria	Geobacter soli	1510391	WP_082021158.1 class I SAM-dependent methyltransferase [Geobacter soli]
`Fenrir Meg22_1012`	Meg22_1012_scaffold_2kb_scaffold_226_43	(37472..38641)	-1	Lokiarchaeota	Lytic	K18827	wbdD, wbbD; O-antigen chain-terminating methyltransferase [EC:2.1.1.- 2.1.1.294 2.7.1.181]	389	Gene3D	G3DSA:3.40.50.150	Vaccinia Virus protein VP39	72	251	1.10E-35	TRUE			KKQ77606.1	40.1	401	223	6	1	387	1	398	3.90E-79	305.8	390	401	0;Candidatus Zambryskibacteria	Parcubacteria group bacterium GW2011_GWA1_38_7;Candidatus Zambryskibacteria bacterium RIFCSPHIGHO2_01_FULL_39_63;Candidatus Zambryskibacteria bacterium RIFCSPHIGHO2_02_FULL_39_19;Candidatus Zambryskibacteria bacterium RIFCSPHIGHO2_12_FULL_39_21;Candidatus Zambryskibacteria bacterium RIFCSPLOWO2_01_FULL_39_39	1618783;1802733;1802746;1802752;1802758	KKQ77606.1 Methyltransferase type 12 [Parcubacteria group bacterium GW2011_GWA1_38_7]
`Fenrir Meg22_1012`	Meg22_1012_scaffold_2kb_scaffold_226_43	(37472..38641)	-1	Lokiarchaeota	Lytic	K18827	wbdD, wbbD; O-antigen chain-terminating methyltransferase [EC:2.1.1.- 2.1.1.294 2.7.1.181]	389	Gene3D	G3DSA:3.40.50.150	Vaccinia Virus protein VP39	72	251	1.10E-35	TRUE			HEC98962.1	41	400	220	6	2	386	8	406	3.90E-79	305.8	390	417	N/A	N/A		HEC98962.1 class I SAM-dependent methyltransferase [Proteobacteria bacterium]
`Fenrir Meg22_1012`	Meg22_1012_scaffold_2kb_scaffold_226_43	(37472..38641)	-1	Lokiarchaeota	Lytic	K18827	wbdD, wbbD; O-antigen chain-terminating methyltransferase [EC:2.1.1.- 2.1.1.294 2.7.1.181]	389	Gene3D	G3DSA:3.40.50.150	Vaccinia Virus protein VP39	72	251	1.10E-35	TRUE			OPY61697.1	44	400	208	6	3	387	9	407	1.00E-87	334.3	390	414	Firmicutes	Pelotomaculum sp. PtaU1.Bin065	1811696	OPY61697.1 putative S-adenosylmethionine-dependent methyltransferase [Pelotomaculum sp. PtaU1.Bin065]
`Fenrir Meg22_1012`	Meg22_1012_scaffold_2kb_scaffold_226_43	(37472..38641)	-1	Lokiarchaeota	Lytic	K18827	wbdD, wbbD; O-antigen chain-terminating methyltransferase [EC:2.1.1.- 2.1.1.294 2.7.1.181]	389	Gene3D	G3DSA:3.40.50.150	Vaccinia Virus protein VP39	72	251	1.10E-35	TRUE			WP_066221122.1	45.2	403	205	7	1	389	11	411	4.70E-93	352.1	390	808	Proteobacteria	Arcobacter cryaerophilus	28198	WP_066221122.1 methyltransferase domain-containing protein [Arcobacter cryaerophilus]
`Fenrir Meg22_1012`	Meg22_1012_scaffold_2kb_scaffold_226_43	(37472..38641)	-1	Lokiarchaeota	Lytic	K18827	wbdD, wbbD; O-antigen chain-terminating methyltransferase [EC:2.1.1.- 2.1.1.294 2.7.1.181]	389	Pfam	PF13489	Methyltransferase domain	90	234	2.70E-17	TRUE			PLY06380.1	33.5	325	193	6	2	316	7	318	1.40E-41	181	390	393	Proteobacteria	Arcobacter sp.	1872629	PLY06380.1 hypothetical protein C0625_09585 [Arcobacter sp.]
`Fenrir Meg22_1012`	Meg22_1012_scaffold_2kb_scaffold_226_43	(37472..38641)	-1	Lokiarchaeota	Lytic	K18827	wbdD, wbbD; O-antigen chain-terminating methyltransferase [EC:2.1.1.- 2.1.1.294 2.7.1.181]	389	Pfam	PF13489	Methyltransferase domain	90	234	2.70E-17	TRUE			NLD36595.1	40.9	296	165	4	1	288	7	300	1.80E-60	243.8	390	308	N/A	N/A		NLD36595.1 class I SAM-dependent methyltransferase [Desulfatiglans sp.]
`Fenrir Meg22_1012`	Meg22_1012_scaffold_2kb_scaffold_226_43	(37472..38641)	-1	Lokiarchaeota	Lytic	K18827	wbdD, wbbD; O-antigen chain-terminating methyltransferase [EC:2.1.1.- 2.1.1.294 2.7.1.181]	389	Pfam	PF13489	Methyltransferase domain	90	234	2.70E-17	TRUE			KIE43359.1	38.8	348	199	6	54	389	3	348	5.80E-67	265.4	390	348	Proteobacteria	Geobacter soli	1510391	KIE43359.1 hypothetical protein SE37_12320 [Geobacter soli]
`Fenrir Meg22_1012`	Meg22_1012_scaffold_2kb_scaffold_226_43	(37472..38641)	-1	Lokiarchaeota	Lytic	K18827	wbdD, wbbD; O-antigen chain-terminating methyltransferase [EC:2.1.1.- 2.1.1.294 2.7.1.181]	389	Pfam	PF13489	Methyltransferase domain	90	234	2.70E-17	TRUE			WP_108102571.1	37.3	397	236	5	2	386	5	400	1.10E-68	271.2	390	404	Proteobacteria	Geobacter sp. DSM 2909	2135459	WP_108102571.1 class I SAM-dependent methyltransferase [Geobacter sp. DSM 2909]
`Fenrir Meg22_1012`	Meg22_1012_scaffold_2kb_scaffold_226_43	(37472..38641)	-1	Lokiarchaeota	Lytic	K18827	wbdD, wbbD; O-antigen chain-terminating methyltransferase [EC:2.1.1.- 2.1.1.294 2.7.1.181]	389	Pfam	PF13489	Methyltransferase domain	90	234	2.70E-17	TRUE			HDY77193.1	42.5	398	167	9	3	389	4	350	2.10E-77	300.1	390	350	N/A	N/A		HDY77193.1 class I SAM-dependent methyltransferase [archaeon]
`Fenrir Meg22_1012`	Meg22_1012_scaffold_2kb_scaffold_226_43	(37472..38641)	-1	Lokiarchaeota	Lytic	K18827	wbdD, wbbD; O-antigen chain-terminating methyltransferase [EC:2.1.1.- 2.1.1.294 2.7.1.181]	389	Pfam	PF13489	Methyltransferase domain	90	234	2.70E-17	TRUE			WP_082021158.1	38	403	234	7	1	389	4	404	3.30E-78	302.8	390	404	Proteobacteria	Geobacter soli	1510391	WP_082021158.1 class I SAM-dependent methyltransferase [Geobacter soli]
`Fenrir Meg22_1012`	Meg22_1012_scaffold_2kb_scaffold_226_43	(37472..38641)	-1	Lokiarchaeota	Lytic	K18827	wbdD, wbbD; O-antigen chain-terminating methyltransferase [EC:2.1.1.- 2.1.1.294 2.7.1.181]	389	Pfam	PF13489	Methyltransferase domain	90	234	2.70E-17	TRUE			KKQ77606.1	40.1	401	223	6	1	387	1	398	3.90E-79	305.8	390	401	0;Candidatus Zambryskibacteria	Parcubacteria group bacterium GW2011_GWA1_38_7;Candidatus Zambryskibacteria bacterium RIFCSPHIGHO2_01_FULL_39_63;Candidatus Zambryskibacteria bacterium RIFCSPHIGHO2_02_FULL_39_19;Candidatus Zambryskibacteria bacterium RIFCSPHIGHO2_12_FULL_39_21;Candidatus Zambryskibacteria bacterium RIFCSPLOWO2_01_FULL_39_39	1618783;1802733;1802746;1802752;1802758	KKQ77606.1 Methyltransferase type 12 [Parcubacteria group bacterium GW2011_GWA1_38_7]
`Fenrir Meg22_1012`	Meg22_1012_scaffold_2kb_scaffold_226_43	(37472..38641)	-1	Lokiarchaeota	Lytic	K18827	wbdD, wbbD; O-antigen chain-terminating methyltransferase [EC:2.1.1.- 2.1.1.294 2.7.1.181]	389	Pfam	PF13489	Methyltransferase domain	90	234	2.70E-17	TRUE			HEC98962.1	41	400	220	6	2	386	8	406	3.90E-79	305.8	390	417	N/A	N/A		HEC98962.1 class I SAM-dependent methyltransferase [Proteobacteria bacterium]
`Fenrir Meg22_1012`	Meg22_1012_scaffold_2kb_scaffold_226_43	(37472..38641)	-1	Lokiarchaeota	Lytic	K18827	wbdD, wbbD; O-antigen chain-terminating methyltransferase [EC:2.1.1.- 2.1.1.294 2.7.1.181]	389	Pfam	PF13489	Methyltransferase domain	90	234	2.70E-17	TRUE			OPY61697.1	44	400	208	6	3	387	9	407	1.00E-87	334.3	390	414	Firmicutes	Pelotomaculum sp. PtaU1.Bin065	1811696	OPY61697.1 putative S-adenosylmethionine-dependent methyltransferase [Pelotomaculum sp. PtaU1.Bin065]
`Fenrir Meg22_1012`	Meg22_1012_scaffold_2kb_scaffold_226_43	(37472..38641)	-1	Lokiarchaeota	Lytic	K18827	wbdD, wbbD; O-antigen chain-terminating methyltransferase [EC:2.1.1.- 2.1.1.294 2.7.1.181]	389	Pfam	PF13489	Methyltransferase domain	90	234	2.70E-17	TRUE			WP_066221122.1	45.2	403	205	7	1	389	11	411	4.70E-93	352.1	390	808	Proteobacteria	Arcobacter cryaerophilus	28198	WP_066221122.1 methyltransferase domain-containing protein [Arcobacter cryaerophilus]
`Fenrir Meg22_1012`	Meg22_1012_scaffold_2kb_scaffold_226_43	(37472..38641)	-1	Lokiarchaeota	Lytic	K18827	wbdD, wbbD; O-antigen chain-terminating methyltransferase [EC:2.1.1.- 2.1.1.294 2.7.1.181]	389	CDD	cd02440	AdoMet_MTases	102	194	1.70E-13	TRUE			PLY06380.1	33.5	325	193	6	2	316	7	318	1.40E-41	181	390	393	Proteobacteria	Arcobacter sp.	1872629	PLY06380.1 hypothetical protein C0625_09585 [Arcobacter sp.]
`Fenrir Meg22_1012`	Meg22_1012_scaffold_2kb_scaffold_226_43	(37472..38641)	-1	Lokiarchaeota	Lytic	K18827	wbdD, wbbD; O-antigen chain-terminating methyltransferase [EC:2.1.1.- 2.1.1.294 2.7.1.181]	389	CDD	cd02440	AdoMet_MTases	102	194	1.70E-13	TRUE			NLD36595.1	40.9	296	165	4	1	288	7	300	1.80E-60	243.8	390	308	N/A	N/A		NLD36595.1 class I SAM-dependent methyltransferase [Desulfatiglans sp.]
`Fenrir Meg22_1012`	Meg22_1012_scaffold_2kb_scaffold_226_43	(37472..38641)	-1	Lokiarchaeota	Lytic	K18827	wbdD, wbbD; O-antigen chain-terminating methyltransferase [EC:2.1.1.- 2.1.1.294 2.7.1.181]	389	CDD	cd02440	AdoMet_MTases	102	194	1.70E-13	TRUE			KIE43359.1	38.8	348	199	6	54	389	3	348	5.80E-67	265.4	390	348	Proteobacteria	Geobacter soli	1510391	KIE43359.1 hypothetical protein SE37_12320 [Geobacter soli]
`Fenrir Meg22_1012`	Meg22_1012_scaffold_2kb_scaffold_226_43	(37472..38641)	-1	Lokiarchaeota	Lytic	K18827	wbdD, wbbD; O-antigen chain-terminating methyltransferase [EC:2.1.1.- 2.1.1.294 2.7.1.181]	389	CDD	cd02440	AdoMet_MTases	102	194	1.70E-13	TRUE			WP_108102571.1	37.3	397	236	5	2	386	5	400	1.10E-68	271.2	390	404	Proteobacteria	Geobacter sp. DSM 2909	2135459	WP_108102571.1 class I SAM-dependent methyltransferase [Geobacter sp. DSM 2909]
`Fenrir Meg22_1012`	Meg22_1012_scaffold_2kb_scaffold_226_43	(37472..38641)	-1	Lokiarchaeota	Lytic	K18827	wbdD, wbbD; O-antigen chain-terminating methyltransferase [EC:2.1.1.- 2.1.1.294 2.7.1.181]	389	CDD	cd02440	AdoMet_MTases	102	194	1.70E-13	TRUE			HDY77193.1	42.5	398	167	9	3	389	4	350	2.10E-77	300.1	390	350	N/A	N/A		HDY77193.1 class I SAM-dependent methyltransferase [archaeon]
`Fenrir Meg22_1012`	Meg22_1012_scaffold_2kb_scaffold_226_43	(37472..38641)	-1	Lokiarchaeota	Lytic	K18827	wbdD, wbbD; O-antigen chain-terminating methyltransferase [EC:2.1.1.- 2.1.1.294 2.7.1.181]	389	CDD	cd02440	AdoMet_MTases	102	194	1.70E-13	TRUE			WP_082021158.1	38	403	234	7	1	389	4	404	3.30E-78	302.8	390	404	Proteobacteria	Geobacter soli	1510391	WP_082021158.1 class I SAM-dependent methyltransferase [Geobacter soli]
`Fenrir Meg22_1012`	Meg22_1012_scaffold_2kb_scaffold_226_43	(37472..38641)	-1	Lokiarchaeota	Lytic	K18827	wbdD, wbbD; O-antigen chain-terminating methyltransferase [EC:2.1.1.- 2.1.1.294 2.7.1.181]	389	CDD	cd02440	AdoMet_MTases	102	194	1.70E-13	TRUE			KKQ77606.1	40.1	401	223	6	1	387	1	398	3.90E-79	305.8	390	401	0;Candidatus Zambryskibacteria	Parcubacteria group bacterium GW2011_GWA1_38_7;Candidatus Zambryskibacteria bacterium RIFCSPHIGHO2_01_FULL_39_63;Candidatus Zambryskibacteria bacterium RIFCSPHIGHO2_02_FULL_39_19;Candidatus Zambryskibacteria bacterium RIFCSPHIGHO2_12_FULL_39_21;Candidatus Zambryskibacteria bacterium RIFCSPLOWO2_01_FULL_39_39	1618783;1802733;1802746;1802752;1802758	KKQ77606.1 Methyltransferase type 12 [Parcubacteria group bacterium GW2011_GWA1_38_7]
`Fenrir Meg22_1012`	Meg22_1012_scaffold_2kb_scaffold_226_43	(37472..38641)	-1	Lokiarchaeota	Lytic	K18827	wbdD, wbbD; O-antigen chain-terminating methyltransferase [EC:2.1.1.- 2.1.1.294 2.7.1.181]	389	CDD	cd02440	AdoMet_MTases	102	194	1.70E-13	TRUE			HEC98962.1	41	400	220	6	2	386	8	406	3.90E-79	305.8	390	417	N/A	N/A		HEC98962.1 class I SAM-dependent methyltransferase [Proteobacteria bacterium]
`Fenrir Meg22_1012`	Meg22_1012_scaffold_2kb_scaffold_226_43	(37472..38641)	-1	Lokiarchaeota	Lytic	K18827	wbdD, wbbD; O-antigen chain-terminating methyltransferase [EC:2.1.1.- 2.1.1.294 2.7.1.181]	389	CDD	cd02440	AdoMet_MTases	102	194	1.70E-13	TRUE			OPY61697.1	44	400	208	6	3	387	9	407	1.00E-87	334.3	390	414	Firmicutes	Pelotomaculum sp. PtaU1.Bin065	1811696	OPY61697.1 putative S-adenosylmethionine-dependent methyltransferase [Pelotomaculum sp. PtaU1.Bin065]
`Fenrir Meg22_1012`	Meg22_1012_scaffold_2kb_scaffold_226_43	(37472..38641)	-1	Lokiarchaeota	Lytic	K18827	wbdD, wbbD; O-antigen chain-terminating methyltransferase [EC:2.1.1.- 2.1.1.294 2.7.1.181]	389	CDD	cd02440	AdoMet_MTases	102	194	1.70E-13	TRUE			WP_066221122.1	45.2	403	205	7	1	389	11	411	4.70E-93	352.1	390	808	Proteobacteria	Arcobacter cryaerophilus	28198	WP_066221122.1 methyltransferase domain-containing protein [Arcobacter cryaerophilus]
`Fenrir Meg22_1012`	Meg22_1012_scaffold_2kb_scaffold_226_44	(38622..39647)	-1	Lokiarchaeota	Lytic	K22227	ahbD; heme synthase	341	SFLD	SFLDG01387	BtrN-like SPASM domain containing	20	315	0	TRUE	IPR034391	Cmo-like SPASM domain containing	WP_141052024.1	60.4	333	131	1	2	333	1	333	1.10E-117	433.7	342	333	Proteobacteria	Arcobacter cryaerophilus	28198	WP_141052024.1 radical SAM protein [Arcobacter cryaerophilus]
`Fenrir Meg22_1012`	Meg22_1012_scaffold_2kb_scaffold_226_44	(38622..39647)	-1	Lokiarchaeota	Lytic	K22227	ahbD; heme synthase	341	SFLD	SFLDG01387	BtrN-like SPASM domain containing	20	315	0	TRUE	IPR034391	Cmo-like SPASM domain containing	WP_177587637.1	58.5	337	138	2	2	336	1	337	8.20E-118	434.1	342	337	Candidatus Melainabacteria	Candidatus Gastranaerophilales bacterium	2137880	WP_177587637.1 SPASM domain-containing protein [Candidatus Gastranaerophilales bacterium]
`Fenrir Meg22_1012`	Meg22_1012_scaffold_2kb_scaffold_226_44	(38622..39647)	-1	Lokiarchaeota	Lytic	K22227	ahbD; heme synthase	341	SFLD	SFLDG01387	BtrN-like SPASM domain containing	20	315	0	TRUE	IPR034391	Cmo-like SPASM domain containing	NTV89622.1	60.2	332	130	2	2	331	1	332	2.20E-118	436	342	341	N/A	N/A		NTV89622.1 radical SAM protein [Clostridiales bacterium]
`Fenrir Meg22_1012`	Meg22_1012_scaffold_2kb_scaffold_226_44	(38622..39647)	-1	Lokiarchaeota	Lytic	K22227	ahbD; heme synthase	341	SFLD	SFLDG01387	BtrN-like SPASM domain containing	20	315	0	TRUE	IPR034391	Cmo-like SPASM domain containing	OGP70466.1	60.1	333	132	1	2	333	1	333	9.70E-119	437.2	342	344	Proteobacteria	Deltaproteobacteria bacterium RBG_13_60_28	1797833	OGP70466.1 radical SAM protein [Deltaproteobacteria bacterium RBG_13_60_28]
`Fenrir Meg22_1012`	Meg22_1012_scaffold_2kb_scaffold_226_44	(38622..39647)	-1	Lokiarchaeota	Lytic	K22227	ahbD; heme synthase	341	SFLD	SFLDG01387	BtrN-like SPASM domain containing	20	315	0	TRUE	IPR034391	Cmo-like SPASM domain containing	NLD36594.1	60.8	329	128	1	2	329	1	329	5.70E-119	438	342	335	N/A	N/A		NLD36594.1 radical SAM protein [Desulfatiglans sp.]
`Fenrir Meg22_1012`	Meg22_1012_scaffold_2kb_scaffold_226_44	(38622..39647)	-1	Lokiarchaeota	Lytic	K22227	ahbD; heme synthase	341	SFLD	SFLDG01387	BtrN-like SPASM domain containing	20	315	0	TRUE	IPR034391	Cmo-like SPASM domain containing	RJR35544.1	59.7	335	134	1	2	335	1	335	2.00E-119	439.5	342	344	Proteobacteria	Deltaproteobacteria bacterium	2026735	RJR35544.1 radical SAM protein [Deltaproteobacteria bacterium]
`Fenrir Meg22_1012`	Meg22_1012_scaffold_2kb_scaffold_226_44	(38622..39647)	-1	Lokiarchaeota	Lytic	K22227	ahbD; heme synthase	341	SFLD	SFLDG01387	BtrN-like SPASM domain containing	20	315	0	TRUE	IPR034391	Cmo-like SPASM domain containing	WP_147738069.1	61.4	332	126	2	2	331	1	332	4.00E-120	441.8	342	336	Spirochaetes	Brachyspira aalborgi	29522	WP_147738069.1 SPASM domain-containing protein [Brachyspira aalborgi]
`Fenrir Meg22_1012`	Meg22_1012_scaffold_2kb_scaffold_226_44	(38622..39647)	-1	Lokiarchaeota	Lytic	K22227	ahbD; heme synthase	341	SFLD	SFLDG01387	BtrN-like SPASM domain containing	20	315	0	TRUE	IPR034391	Cmo-like SPASM domain containing	MBA3047744.1	64.1	334	119	1	2	334	1	334	1.10E-125	460.3	342	334	N/A	N/A		MBA3047744.1 radical SAM protein [Candidatus Falkowbacteria bacterium]
`Fenrir Meg22_1012`	Meg22_1012_scaffold_2kb_scaffold_226_44	(38622..39647)	-1	Lokiarchaeota	Lytic	K22227	ahbD; heme synthase	341	SFLD	SFLDG01387	BtrN-like SPASM domain containing	20	315	0	TRUE	IPR034391	Cmo-like SPASM domain containing	PKL53731.1	63.8	334	120	1	2	334	1	334	2.10E-129	472.6	342	335	Euryarchaeota	Candidatus Methanoperedenaceae archaeon HGW-Methanoperedenaceae-1	2013824	PKL53731.1 radical SAM protein [Candidatus Methanoperedenaceae archaeon HGW-Methanoperedenaceae-1]
`Fenrir Meg22_1012`	Meg22_1012_scaffold_2kb_scaffold_226_44	(38622..39647)	-1	Lokiarchaeota	Lytic	K22227	ahbD; heme synthase	341	SFLD	SFLDG01387	BtrN-like SPASM domain containing	20	315	0	TRUE	IPR034391	Cmo-like SPASM domain containing	HDY77194.1	73.3	330	87	1	2	331	1	329	1.40E-138	503.1	342	332	N/A	N/A		HDY77194.1 radical SAM protein [archaeon]
`Fenrir Meg22_1012`	Meg22_1012_scaffold_2kb_scaffold_226_44	(38622..39647)	-1	Lokiarchaeota	Lytic	K22227	ahbD; heme synthase	341	SUPERFAMILY	SSF102114	Radical SAM enzymes	27	311	5.89E-43	TRUE			WP_141052024.1	60.4	333	131	1	2	333	1	333	1.10E-117	433.7	342	333	Proteobacteria	Arcobacter cryaerophilus	28198	WP_141052024.1 radical SAM protein [Arcobacter cryaerophilus]
`Fenrir Meg22_1012`	Meg22_1012_scaffold_2kb_scaffold_226_44	(38622..39647)	-1	Lokiarchaeota	Lytic	K22227	ahbD; heme synthase	341	SUPERFAMILY	SSF102114	Radical SAM enzymes	27	311	5.89E-43	TRUE			WP_177587637.1	58.5	337	138	2	2	336	1	337	8.20E-118	434.1	342	337	Candidatus Melainabacteria	Candidatus Gastranaerophilales bacterium	2137880	WP_177587637.1 SPASM domain-containing protein [Candidatus Gastranaerophilales bacterium]
`Fenrir Meg22_1012`	Meg22_1012_scaffold_2kb_scaffold_226_44	(38622..39647)	-1	Lokiarchaeota	Lytic	K22227	ahbD; heme synthase	341	SUPERFAMILY	SSF102114	Radical SAM enzymes	27	311	5.89E-43	TRUE			NTV89622.1	60.2	332	130	2	2	331	1	332	2.20E-118	436	342	341	N/A	N/A		NTV89622.1 radical SAM protein [Clostridiales bacterium]
`Fenrir Meg22_1012`	Meg22_1012_scaffold_2kb_scaffold_226_44	(38622..39647)	-1	Lokiarchaeota	Lytic	K22227	ahbD; heme synthase	341	SUPERFAMILY	SSF102114	Radical SAM enzymes	27	311	5.89E-43	TRUE			OGP70466.1	60.1	333	132	1	2	333	1	333	9.70E-119	437.2	342	344	Proteobacteria	Deltaproteobacteria bacterium RBG_13_60_28	1797833	OGP70466.1 radical SAM protein [Deltaproteobacteria bacterium RBG_13_60_28]
`Fenrir Meg22_1012`	Meg22_1012_scaffold_2kb_scaffold_226_44	(38622..39647)	-1	Lokiarchaeota	Lytic	K22227	ahbD; heme synthase	341	SUPERFAMILY	SSF102114	Radical SAM enzymes	27	311	5.89E-43	TRUE			NLD36594.1	60.8	329	128	1	2	329	1	329	5.70E-119	438	342	335	N/A	N/A		NLD36594.1 radical SAM protein [Desulfatiglans sp.]
`Fenrir Meg22_1012`	Meg22_1012_scaffold_2kb_scaffold_226_44	(38622..39647)	-1	Lokiarchaeota	Lytic	K22227	ahbD; heme synthase	341	SUPERFAMILY	SSF102114	Radical SAM enzymes	27	311	5.89E-43	TRUE			RJR35544.1	59.7	335	134	1	2	335	1	335	2.00E-119	439.5	342	344	Proteobacteria	Deltaproteobacteria bacterium	2026735	RJR35544.1 radical SAM protein [Deltaproteobacteria bacterium]
`Fenrir Meg22_1012`	Meg22_1012_scaffold_2kb_scaffold_226_44	(38622..39647)	-1	Lokiarchaeota	Lytic	K22227	ahbD; heme synthase	341	SUPERFAMILY	SSF102114	Radical SAM enzymes	27	311	5.89E-43	TRUE			WP_147738069.1	61.4	332	126	2	2	331	1	332	4.00E-120	441.8	342	336	Spirochaetes	Brachyspira aalborgi	29522	WP_147738069.1 SPASM domain-containing protein [Brachyspira aalborgi]
`Fenrir Meg22_1012`	Meg22_1012_scaffold_2kb_scaffold_226_44	(38622..39647)	-1	Lokiarchaeota	Lytic	K22227	ahbD; heme synthase	341	SUPERFAMILY	SSF102114	Radical SAM enzymes	27	311	5.89E-43	TRUE			MBA3047744.1	64.1	334	119	1	2	334	1	334	1.10E-125	460.3	342	334	N/A	N/A		MBA3047744.1 radical SAM protein [Candidatus Falkowbacteria bacterium]
`Fenrir Meg22_1012`	Meg22_1012_scaffold_2kb_scaffold_226_44	(38622..39647)	-1	Lokiarchaeota	Lytic	K22227	ahbD; heme synthase	341	SUPERFAMILY	SSF102114	Radical SAM enzymes	27	311	5.89E-43	TRUE			PKL53731.1	63.8	334	120	1	2	334	1	334	2.10E-129	472.6	342	335	Euryarchaeota	Candidatus Methanoperedenaceae archaeon HGW-Methanoperedenaceae-1	2013824	PKL53731.1 radical SAM protein [Candidatus Methanoperedenaceae archaeon HGW-Methanoperedenaceae-1]
`Fenrir Meg22_1012`	Meg22_1012_scaffold_2kb_scaffold_226_44	(38622..39647)	-1	Lokiarchaeota	Lytic	K22227	ahbD; heme synthase	341	SUPERFAMILY	SSF102114	Radical SAM enzymes	27	311	5.89E-43	TRUE			HDY77194.1	73.3	330	87	1	2	331	1	329	1.40E-138	503.1	342	332	N/A	N/A		HDY77194.1 radical SAM protein [archaeon]
`Fenrir Meg22_1012`	Meg22_1012_scaffold_2kb_scaffold_226_44	(38622..39647)	-1	Lokiarchaeota	Lytic	K22227	ahbD; heme synthase	341	CDD	cd01335	Radical_SAM	32	210	9.16E-15	TRUE			WP_141052024.1	60.4	333	131	1	2	333	1	333	1.10E-117	433.7	342	333	Proteobacteria	Arcobacter cryaerophilus	28198	WP_141052024.1 radical SAM protein [Arcobacter cryaerophilus]
`Fenrir Meg22_1012`	Meg22_1012_scaffold_2kb_scaffold_226_44	(38622..39647)	-1	Lokiarchaeota	Lytic	K22227	ahbD; heme synthase	341	CDD	cd01335	Radical_SAM	32	210	9.16E-15	TRUE			WP_177587637.1	58.5	337	138	2	2	336	1	337	8.20E-118	434.1	342	337	Candidatus Melainabacteria	Candidatus Gastranaerophilales bacterium	2137880	WP_177587637.1 SPASM domain-containing protein [Candidatus Gastranaerophilales bacterium]
`Fenrir Meg22_1012`	Meg22_1012_scaffold_2kb_scaffold_226_44	(38622..39647)	-1	Lokiarchaeota	Lytic	K22227	ahbD; heme synthase	341	CDD	cd01335	Radical_SAM	32	210	9.16E-15	TRUE			NTV89622.1	60.2	332	130	2	2	331	1	332	2.20E-118	436	342	341	N/A	N/A		NTV89622.1 radical SAM protein [Clostridiales bacterium]
`Fenrir Meg22_1012`	Meg22_1012_scaffold_2kb_scaffold_226_44	(38622..39647)	-1	Lokiarchaeota	Lytic	K22227	ahbD; heme synthase	341	CDD	cd01335	Radical_SAM	32	210	9.16E-15	TRUE			OGP70466.1	60.1	333	132	1	2	333	1	333	9.70E-119	437.2	342	344	Proteobacteria	Deltaproteobacteria bacterium RBG_13_60_28	1797833	OGP70466.1 radical SAM protein [Deltaproteobacteria bacterium RBG_13_60_28]
`Fenrir Meg22_1012`	Meg22_1012_scaffold_2kb_scaffold_226_44	(38622..39647)	-1	Lokiarchaeota	Lytic	K22227	ahbD; heme synthase	341	CDD	cd01335	Radical_SAM	32	210	9.16E-15	TRUE			NLD36594.1	60.8	329	128	1	2	329	1	329	5.70E-119	438	342	335	N/A	N/A		NLD36594.1 radical SAM protein [Desulfatiglans sp.]
`Fenrir Meg22_1012`	Meg22_1012_scaffold_2kb_scaffold_226_44	(38622..39647)	-1	Lokiarchaeota	Lytic	K22227	ahbD; heme synthase	341	CDD	cd01335	Radical_SAM	32	210	9.16E-15	TRUE			RJR35544.1	59.7	335	134	1	2	335	1	335	2.00E-119	439.5	342	344	Proteobacteria	Deltaproteobacteria bacterium	2026735	RJR35544.1 radical SAM protein [Deltaproteobacteria bacterium]
`Fenrir Meg22_1012`	Meg22_1012_scaffold_2kb_scaffold_226_44	(38622..39647)	-1	Lokiarchaeota	Lytic	K22227	ahbD; heme synthase	341	CDD	cd01335	Radical_SAM	32	210	9.16E-15	TRUE			WP_147738069.1	61.4	332	126	2	2	331	1	332	4.00E-120	441.8	342	336	Spirochaetes	Brachyspira aalborgi	29522	WP_147738069.1 SPASM domain-containing protein [Brachyspira aalborgi]
`Fenrir Meg22_1012`	Meg22_1012_scaffold_2kb_scaffold_226_44	(38622..39647)	-1	Lokiarchaeota	Lytic	K22227	ahbD; heme synthase	341	CDD	cd01335	Radical_SAM	32	210	9.16E-15	TRUE			MBA3047744.1	64.1	334	119	1	2	334	1	334	1.10E-125	460.3	342	334	N/A	N/A		MBA3047744.1 radical SAM protein [Candidatus Falkowbacteria bacterium]
`Fenrir Meg22_1012`	Meg22_1012_scaffold_2kb_scaffold_226_44	(38622..39647)	-1	Lokiarchaeota	Lytic	K22227	ahbD; heme synthase	341	CDD	cd01335	Radical_SAM	32	210	9.16E-15	TRUE			PKL53731.1	63.8	334	120	1	2	334	1	334	2.10E-129	472.6	342	335	Euryarchaeota	Candidatus Methanoperedenaceae archaeon HGW-Methanoperedenaceae-1	2013824	PKL53731.1 radical SAM protein [Candidatus Methanoperedenaceae archaeon HGW-Methanoperedenaceae-1]
`Fenrir Meg22_1012`	Meg22_1012_scaffold_2kb_scaffold_226_44	(38622..39647)	-1	Lokiarchaeota	Lytic	K22227	ahbD; heme synthase	341	CDD	cd01335	Radical_SAM	32	210	9.16E-15	TRUE			HDY77194.1	73.3	330	87	1	2	331	1	329	1.40E-138	503.1	342	332	N/A	N/A		HDY77194.1 radical SAM protein [archaeon]
`Fenrir Meg22_1012`	Meg22_1012_scaffold_2kb_scaffold_226_44	(38622..39647)	-1	Lokiarchaeota	Lytic	K22227	ahbD; heme synthase	341	Pfam	PF04055	Radical SAM superfamily	34	182	2.50E-14	TRUE	IPR007197	Radical SAM	WP_141052024.1	60.4	333	131	1	2	333	1	333	1.10E-117	433.7	342	333	Proteobacteria	Arcobacter cryaerophilus	28198	WP_141052024.1 radical SAM protein [Arcobacter cryaerophilus]
`Fenrir Meg22_1012`	Meg22_1012_scaffold_2kb_scaffold_226_44	(38622..39647)	-1	Lokiarchaeota	Lytic	K22227	ahbD; heme synthase	341	Pfam	PF04055	Radical SAM superfamily	34	182	2.50E-14	TRUE	IPR007197	Radical SAM	WP_177587637.1	58.5	337	138	2	2	336	1	337	8.20E-118	434.1	342	337	Candidatus Melainabacteria	Candidatus Gastranaerophilales bacterium	2137880	WP_177587637.1 SPASM domain-containing protein [Candidatus Gastranaerophilales bacterium]
`Fenrir Meg22_1012`	Meg22_1012_scaffold_2kb_scaffold_226_44	(38622..39647)	-1	Lokiarchaeota	Lytic	K22227	ahbD; heme synthase	341	Pfam	PF04055	Radical SAM superfamily	34	182	2.50E-14	TRUE	IPR007197	Radical SAM	NTV89622.1	60.2	332	130	2	2	331	1	332	2.20E-118	436	342	341	N/A	N/A		NTV89622.1 radical SAM protein [Clostridiales bacterium]
`Fenrir Meg22_1012`	Meg22_1012_scaffold_2kb_scaffold_226_44	(38622..39647)	-1	Lokiarchaeota	Lytic	K22227	ahbD; heme synthase	341	Pfam	PF04055	Radical SAM superfamily	34	182	2.50E-14	TRUE	IPR007197	Radical SAM	OGP70466.1	60.1	333	132	1	2	333	1	333	9.70E-119	437.2	342	344	Proteobacteria	Deltaproteobacteria bacterium RBG_13_60_28	1797833	OGP70466.1 radical SAM protein [Deltaproteobacteria bacterium RBG_13_60_28]
`Fenrir Meg22_1012`	Meg22_1012_scaffold_2kb_scaffold_226_44	(38622..39647)	-1	Lokiarchaeota	Lytic	K22227	ahbD; heme synthase	341	Pfam	PF04055	Radical SAM superfamily	34	182	2.50E-14	TRUE	IPR007197	Radical SAM	NLD36594.1	60.8	329	128	1	2	329	1	329	5.70E-119	438	342	335	N/A	N/A		NLD36594.1 radical SAM protein [Desulfatiglans sp.]
`Fenrir Meg22_1012`	Meg22_1012_scaffold_2kb_scaffold_226_44	(38622..39647)	-1	Lokiarchaeota	Lytic	K22227	ahbD; heme synthase	341	Pfam	PF04055	Radical SAM superfamily	34	182	2.50E-14	TRUE	IPR007197	Radical SAM	RJR35544.1	59.7	335	134	1	2	335	1	335	2.00E-119	439.5	342	344	Proteobacteria	Deltaproteobacteria bacterium	2026735	RJR35544.1 radical SAM protein [Deltaproteobacteria bacterium]
`Fenrir Meg22_1012`	Meg22_1012_scaffold_2kb_scaffold_226_44	(38622..39647)	-1	Lokiarchaeota	Lytic	K22227	ahbD; heme synthase	341	Pfam	PF04055	Radical SAM superfamily	34	182	2.50E-14	TRUE	IPR007197	Radical SAM	WP_147738069.1	61.4	332	126	2	2	331	1	332	4.00E-120	441.8	342	336	Spirochaetes	Brachyspira aalborgi	29522	WP_147738069.1 SPASM domain-containing protein [Brachyspira aalborgi]
`Fenrir Meg22_1012`	Meg22_1012_scaffold_2kb_scaffold_226_44	(38622..39647)	-1	Lokiarchaeota	Lytic	K22227	ahbD; heme synthase	341	Pfam	PF04055	Radical SAM superfamily	34	182	2.50E-14	TRUE	IPR007197	Radical SAM	MBA3047744.1	64.1	334	119	1	2	334	1	334	1.10E-125	460.3	342	334	N/A	N/A		MBA3047744.1 radical SAM protein [Candidatus Falkowbacteria bacterium]
`Fenrir Meg22_1012`	Meg22_1012_scaffold_2kb_scaffold_226_44	(38622..39647)	-1	Lokiarchaeota	Lytic	K22227	ahbD; heme synthase	341	Pfam	PF04055	Radical SAM superfamily	34	182	2.50E-14	TRUE	IPR007197	Radical SAM	PKL53731.1	63.8	334	120	1	2	334	1	334	2.10E-129	472.6	342	335	Euryarchaeota	Candidatus Methanoperedenaceae archaeon HGW-Methanoperedenaceae-1	2013824	PKL53731.1 radical SAM protein [Candidatus Methanoperedenaceae archaeon HGW-Methanoperedenaceae-1]
`Fenrir Meg22_1012`	Meg22_1012_scaffold_2kb_scaffold_226_44	(38622..39647)	-1	Lokiarchaeota	Lytic	K22227	ahbD; heme synthase	341	Pfam	PF04055	Radical SAM superfamily	34	182	2.50E-14	TRUE	IPR007197	Radical SAM	HDY77194.1	73.3	330	87	1	2	331	1	329	1.40E-138	503.1	342	332	N/A	N/A		HDY77194.1 radical SAM protein [archaeon]
`Fenrir Meg22_1012`	Meg22_1012_scaffold_2kb_scaffold_226_44	(38622..39647)	-1	Lokiarchaeota	Lytic	K22227	ahbD; heme synthase	341	Pfam	PF13186	Iron-sulfur cluster-binding domain	244	310	4.00E-13	TRUE	IPR023885	4Fe4S-binding SPASM domain	WP_141052024.1	60.4	333	131	1	2	333	1	333	1.10E-117	433.7	342	333	Proteobacteria	Arcobacter cryaerophilus	28198	WP_141052024.1 radical SAM protein [Arcobacter cryaerophilus]
`Fenrir Meg22_1012`	Meg22_1012_scaffold_2kb_scaffold_226_44	(38622..39647)	-1	Lokiarchaeota	Lytic	K22227	ahbD; heme synthase	341	Pfam	PF13186	Iron-sulfur cluster-binding domain	244	310	4.00E-13	TRUE	IPR023885	4Fe4S-binding SPASM domain	WP_177587637.1	58.5	337	138	2	2	336	1	337	8.20E-118	434.1	342	337	Candidatus Melainabacteria	Candidatus Gastranaerophilales bacterium	2137880	WP_177587637.1 SPASM domain-containing protein [Candidatus Gastranaerophilales bacterium]
`Fenrir Meg22_1012`	Meg22_1012_scaffold_2kb_scaffold_226_44	(38622..39647)	-1	Lokiarchaeota	Lytic	K22227	ahbD; heme synthase	341	Pfam	PF13186	Iron-sulfur cluster-binding domain	244	310	4.00E-13	TRUE	IPR023885	4Fe4S-binding SPASM domain	NTV89622.1	60.2	332	130	2	2	331	1	332	2.20E-118	436	342	341	N/A	N/A		NTV89622.1 radical SAM protein [Clostridiales bacterium]
`Fenrir Meg22_1012`	Meg22_1012_scaffold_2kb_scaffold_226_44	(38622..39647)	-1	Lokiarchaeota	Lytic	K22227	ahbD; heme synthase	341	Pfam	PF13186	Iron-sulfur cluster-binding domain	244	310	4.00E-13	TRUE	IPR023885	4Fe4S-binding SPASM domain	OGP70466.1	60.1	333	132	1	2	333	1	333	9.70E-119	437.2	342	344	Proteobacteria	Deltaproteobacteria bacterium RBG_13_60_28	1797833	OGP70466.1 radical SAM protein [Deltaproteobacteria bacterium RBG_13_60_28]
`Fenrir Meg22_1012`	Meg22_1012_scaffold_2kb_scaffold_226_44	(38622..39647)	-1	Lokiarchaeota	Lytic	K22227	ahbD; heme synthase	341	Pfam	PF13186	Iron-sulfur cluster-binding domain	244	310	4.00E-13	TRUE	IPR023885	4Fe4S-binding SPASM domain	NLD36594.1	60.8	329	128	1	2	329	1	329	5.70E-119	438	342	335	N/A	N/A		NLD36594.1 radical SAM protein [Desulfatiglans sp.]
`Fenrir Meg22_1012`	Meg22_1012_scaffold_2kb_scaffold_226_44	(38622..39647)	-1	Lokiarchaeota	Lytic	K22227	ahbD; heme synthase	341	Pfam	PF13186	Iron-sulfur cluster-binding domain	244	310	4.00E-13	TRUE	IPR023885	4Fe4S-binding SPASM domain	RJR35544.1	59.7	335	134	1	2	335	1	335	2.00E-119	439.5	342	344	Proteobacteria	Deltaproteobacteria bacterium	2026735	RJR35544.1 radical SAM protein [Deltaproteobacteria bacterium]
`Fenrir Meg22_1012`	Meg22_1012_scaffold_2kb_scaffold_226_44	(38622..39647)	-1	Lokiarchaeota	Lytic	K22227	ahbD; heme synthase	341	Pfam	PF13186	Iron-sulfur cluster-binding domain	244	310	4.00E-13	TRUE	IPR023885	4Fe4S-binding SPASM domain	WP_147738069.1	61.4	332	126	2	2	331	1	332	4.00E-120	441.8	342	336	Spirochaetes	Brachyspira aalborgi	29522	WP_147738069.1 SPASM domain-containing protein [Brachyspira aalborgi]
`Fenrir Meg22_1012`	Meg22_1012_scaffold_2kb_scaffold_226_44	(38622..39647)	-1	Lokiarchaeota	Lytic	K22227	ahbD; heme synthase	341	Pfam	PF13186	Iron-sulfur cluster-binding domain	244	310	4.00E-13	TRUE	IPR023885	4Fe4S-binding SPASM domain	MBA3047744.1	64.1	334	119	1	2	334	1	334	1.10E-125	460.3	342	334	N/A	N/A		MBA3047744.1 radical SAM protein [Candidatus Falkowbacteria bacterium]
`Fenrir Meg22_1012`	Meg22_1012_scaffold_2kb_scaffold_226_44	(38622..39647)	-1	Lokiarchaeota	Lytic	K22227	ahbD; heme synthase	341	Pfam	PF13186	Iron-sulfur cluster-binding domain	244	310	4.00E-13	TRUE	IPR023885	4Fe4S-binding SPASM domain	PKL53731.1	63.8	334	120	1	2	334	1	334	2.10E-129	472.6	342	335	Euryarchaeota	Candidatus Methanoperedenaceae archaeon HGW-Methanoperedenaceae-1	2013824	PKL53731.1 radical SAM protein [Candidatus Methanoperedenaceae archaeon HGW-Methanoperedenaceae-1]
`Fenrir Meg22_1012`	Meg22_1012_scaffold_2kb_scaffold_226_44	(38622..39647)	-1	Lokiarchaeota	Lytic	K22227	ahbD; heme synthase	341	Pfam	PF13186	Iron-sulfur cluster-binding domain	244	310	4.00E-13	TRUE	IPR023885	4Fe4S-binding SPASM domain	HDY77194.1	73.3	330	87	1	2	331	1	329	1.40E-138	503.1	342	332	N/A	N/A		HDY77194.1 radical SAM protein [archaeon]
`Fenrir Meg22_1012`	Meg22_1012_scaffold_2kb_scaffold_226_45	(39650..40231)	-1	Lokiarchaeota	Lytic	None	hypothetical protein	NA	NA	NA	NA	NA	NA	NA	NA	NA	NA	HDY78080.1	55.9	93	35	2	1	91	68	156	2.60E-15	92.8	194	174	N/A	N/A		HDY78080.1 hypothetical protein [archaeon]
`Fenrir Meg22_1012`	Meg22_1012_scaffold_2kb_scaffold_226_46	(40359..41015)	-1	Lokiarchaeota	Lytic	None	hypothetical protein	218	Gene3D	G3DSA:3.90.550.10	Spore Coat Polysaccharide Biosynthesis Protein SpsA; Chain A	13	216	2.20E-12	TRUE	IPR029044	Nucleotide-diphospho-sugar transferases	MBC8428467.1	33.8	225	131	9	2	216	7	223	8.70E-20	107.8	219	230	N/A	N/A		MBC8428467.1 hypothetical protein [bacterium]
`Fenrir Meg22_1012`	Meg22_1012_scaffold_2kb_scaffold_226_46	(40359..41015)	-1	Lokiarchaeota	Lytic	None	hypothetical protein	218	Gene3D	G3DSA:3.90.550.10	Spore Coat Polysaccharide Biosynthesis Protein SpsA; Chain A	13	216	2.20E-12	TRUE	IPR029044	Nucleotide-diphospho-sugar transferases	MAG26818.1	38.6	223	123	6	2	216	3	219	1.10E-35	160.6	219	220	N/A	N/A		MAG26818.1 hypothetical protein [Candidatus Pacearchaeota archaeon]
`Fenrir Meg22_1012`	Meg22_1012_scaffold_2kb_scaffold_226_46	(40359..41015)	-1	Lokiarchaeota	Lytic	None	hypothetical protein	218	Gene3D	G3DSA:3.90.550.10	Spore Coat Polysaccharide Biosynthesis Protein SpsA; Chain A	13	216	2.20E-12	TRUE	IPR029044	Nucleotide-diphospho-sugar transferases	HDY78081.1	47.3	220	109	3	1	214	1	219	3.00E-52	215.7	219	230	N/A	N/A		HDY78081.1 hypothetical protein [archaeon]
`Fenrir Meg22_1012`	Meg22_1012_scaffold_2kb_scaffold_226_46	(40359..41015)	-1	Lokiarchaeota	Lytic	None	hypothetical protein	218	SUPERFAMILY	SSF53448	Nucleotide-diphospho-sugar transferases	17	215	4.85E-15	TRUE	IPR029044	Nucleotide-diphospho-sugar transferases	MBC8428467.1	33.8	225	131	9	2	216	7	223	8.70E-20	107.8	219	230	N/A	N/A		MBC8428467.1 hypothetical protein [bacterium]
`Fenrir Meg22_1012`	Meg22_1012_scaffold_2kb_scaffold_226_46	(40359..41015)	-1	Lokiarchaeota	Lytic	None	hypothetical protein	218	SUPERFAMILY	SSF53448	Nucleotide-diphospho-sugar transferases	17	215	4.85E-15	TRUE	IPR029044	Nucleotide-diphospho-sugar transferases	MAG26818.1	38.6	223	123	6	2	216	3	219	1.10E-35	160.6	219	220	N/A	N/A		MAG26818.1 hypothetical protein [Candidatus Pacearchaeota archaeon]
`Fenrir Meg22_1012`	Meg22_1012_scaffold_2kb_scaffold_226_46	(40359..41015)	-1	Lokiarchaeota	Lytic	None	hypothetical protein	218	SUPERFAMILY	SSF53448	Nucleotide-diphospho-sugar transferases	17	215	4.85E-15	TRUE	IPR029044	Nucleotide-diphospho-sugar transferases	HDY78081.1	47.3	220	109	3	1	214	1	219	3.00E-52	215.7	219	230	N/A	N/A		HDY78081.1 hypothetical protein [archaeon]
`Fenrir Meg22_1012`	Meg22_1012_scaffold_2kb_scaffold_226_47	(40981..41487)	-1	Lokiarchaeota	Lytic	PF04765.13	Protein of unknown function (DUF616)	168	Pfam	PF04765	Protein of unknown function (DUF616)	6	147	1.50E-19	TRUE	IPR006852	Protein of unknown function DUF616	WP_131349087.1	43	142	78	2	6	144	65	206	9.00E-25	124	169	276	Proteobacteria	Azotobacter chroococcum	353	WP_131349087.1 DUF616 domain-containing protein [Azotobacter chroococcum]
`Fenrir Meg22_1012`	Meg22_1012_scaffold_2kb_scaffold_226_47	(40981..41487)	-1	Lokiarchaeota	Lytic	PF04765.13	Protein of unknown function (DUF616)	168	Pfam	PF04765	Protein of unknown function (DUF616)	6	147	1.50E-19	TRUE	IPR006852	Protein of unknown function DUF616	WP_188364149.1	40.7	167	88	4	6	166	53	214	3.10E-25	125.6	169	216	N/A	N/A		WP_188364149.1 DUF616 domain-containing protein [Marinicella pacifica]
`Fenrir Meg22_1012`	Meg22_1012_scaffold_2kb_scaffold_226_47	(40981..41487)	-1	Lokiarchaeota	Lytic	PF04765.13	Protein of unknown function (DUF616)	168	Pfam	PF04765	Protein of unknown function (DUF616)	6	147	1.50E-19	TRUE	IPR006852	Protein of unknown function DUF616	WP_014218602.1	44.8	145	75	2	8	147	72	216	2.40E-25	125.9	169	231	Bacteroidetes	Niastella koreensis;Niastella koreensis GR20-10	354356;700598	WP_014218602.1 DUF616 domain-containing protein [Niastella koreensis]
`Fenrir Meg22_1012`	Meg22_1012_scaffold_2kb_scaffold_226_47	(40981..41487)	-1	Lokiarchaeota	Lytic	PF04765.13	Protein of unknown function (DUF616)	168	Pfam	PF04765	Protein of unknown function (DUF616)	6	147	1.50E-19	TRUE	IPR006852	Protein of unknown function DUF616	WP_095608452.1	44.2	147	77	3	3	144	709	855	1.10E-25	127.1	169	1820	Euryarchaeota	Methanosphaera cuniculi	1077256	WP_095608452.1 glycosyltransferase [Methanosphaera cuniculi]
`Fenrir Meg22_1012`	Meg22_1012_scaffold_2kb_scaffold_226_47	(40981..41487)	-1	Lokiarchaeota	Lytic	PF04765.13	Protein of unknown function (DUF616)	168	Pfam	PF04765	Protein of unknown function (DUF616)	6	147	1.50E-19	TRUE	IPR006852	Protein of unknown function DUF616	RAP51892.1	43.9	139	73	3	11	144	1312	1450	1.10E-25	127.1	169	2080	Euryarchaeota	Methanosphaera sp. SHI613	1945631	RAP51892.1 hypothetical protein BZ133_02070, partial [Methanosphaera sp. SHI613]
`Fenrir Meg22_1012`	Meg22_1012_scaffold_2kb_scaffold_226_47	(40981..41487)	-1	Lokiarchaeota	Lytic	PF04765.13	Protein of unknown function (DUF616)	168	Pfam	PF04765	Protein of unknown function (DUF616)	6	147	1.50E-19	TRUE	IPR006852	Protein of unknown function DUF616	WP_093292910.1	43.2	148	80	3	6	149	57	204	2.80E-26	129	169	217	Firmicutes	Thermoactinomyces sp. DSM 45892	1882753	WP_093292910.1 DUF616 domain-containing protein [Thermoactinomyces sp. DSM 45892]
`Fenrir Meg22_1012`	Meg22_1012_scaffold_2kb_scaffold_226_47	(40981..41487)	-1	Lokiarchaeota	Lytic	PF04765.13	Protein of unknown function (DUF616)	168	Pfam	PF04765	Protein of unknown function (DUF616)	6	147	1.50E-19	TRUE	IPR006852	Protein of unknown function DUF616	WP_132562588.1	44.4	151	79	2	8	153	72	222	4.30E-27	131.7	169	231	Bacteroidetes	Niastella sp. CF465	2135684	WP_132562588.1 DUF616 domain-containing protein [Niastella sp. CF465]
`Fenrir Meg22_1012`	Meg22_1012_scaffold_2kb_scaffold_226_47	(40981..41487)	-1	Lokiarchaeota	Lytic	PF04765.13	Protein of unknown function (DUF616)	168	Pfam	PF04765	Protein of unknown function (DUF616)	6	147	1.50E-19	TRUE	IPR006852	Protein of unknown function DUF616	OHE58694.1	41.8	170	90	5	4	164	54	223	1.50E-27	133.3	169	234	Nitrospirae	Thermodesulfovibrio sp. RBG_19FT_COMBO_42_12	1802373	OHE58694.1 hypothetical protein A2Z47_14370 [Thermodesulfovibrio sp. RBG_19FT_COMBO_42_12]
`Fenrir Meg22_1012`	Meg22_1012_scaffold_2kb_scaffold_226_47	(40981..41487)	-1	Lokiarchaeota	Lytic	PF04765.13	Protein of unknown function (DUF616)	168	Pfam	PF04765	Protein of unknown function (DUF616)	6	147	1.50E-19	TRUE	IPR006852	Protein of unknown function DUF616	HIH35622.1	45.8	144	73	3	6	144	1497	1640	8.70E-28	134	169	2401	N/A	N/A		HIH35622.1 glycosyltransferase [Methanosphaera sp.]
`Fenrir Meg22_1012`	Meg22_1012_scaffold_2kb_scaffold_226_47	(40981..41487)	-1	Lokiarchaeota	Lytic	PF04765.13	Protein of unknown function (DUF616)	168	Pfam	PF04765	Protein of unknown function (DUF616)	6	147	1.50E-19	TRUE	IPR006852	Protein of unknown function DUF616	HII08932.1	45.8	144	73	3	6	144	1497	1640	8.70E-28	134	169	2401	N/A	N/A		HII08932.1 glycosyltransferase [Methanosphaera sp.]
`Fenrir Meg22_1012`	Meg22_1012_scaffold_2kb_scaffold_226_48	(41630..42400)	-1	Lokiarchaeota	Lytic	None	hypothetical protein	NA	NA	NA	NA	NA	NA	NA	NA	NA	NA	HDY78080.1	44.6	139	77	0	5	143	23	161	1.50E-23	120.6	257	174	N/A	N/A		HDY78080.1 hypothetical protein [archaeon]
`Fenrir Meg22_1012`	Meg22_1012_scaffold_2kb_scaffold_226_49	(42387..43124)	-1	Lokiarchaeota	Lytic	K22523	SULT6B1; sulfotransferase 6B1 [EC:2.8.2.-]	245	SUPERFAMILY	SSF52540	P-loop containing nucleotide triphosphate hydrolases	1	244	6.02E-27	TRUE	IPR027417	P-loop containing nucleoside triphosphate hydrolase	RJP80459.1	25.7	241	142	7	4	235	31	243	8.00E-06	61.6	246	270	Proteobacteria	Desulfobacteraceae bacterium	2049433	RJP80459.1 hypothetical protein C4522_07625 [Desulfobacteraceae bacterium]
`Fenrir Meg22_1012`	Meg22_1012_scaffold_2kb_scaffold_226_49	(42387..43124)	-1	Lokiarchaeota	Lytic	K22523	SULT6B1; sulfotransferase 6B1 [EC:2.8.2.-]	245	SUPERFAMILY	SSF52540	P-loop containing nucleotide triphosphate hydrolases	1	244	6.02E-27	TRUE	IPR027417	P-loop containing nucleoside triphosphate hydrolase	WP_163352900.1	26.5	249	156	7	1	243	1	228	2.70E-06	63.2	246	236	Proteobacteria	Desulfovibrio sp. JC010	2593641	WP_163352900.1 sulfotransferase domain-containing protein [Desulfovibrio sp. JC010]
`Fenrir Meg22_1012`	Meg22_1012_scaffold_2kb_scaffold_226_49	(42387..43124)	-1	Lokiarchaeota	Lytic	K22523	SULT6B1; sulfotransferase 6B1 [EC:2.8.2.-]	245	Gene3D	G3DSA:3.40.50.300	P-loop containing nucleotide triphosphate hydrolases	1	245	9.40E-28	TRUE			RJP80459.1	25.7	241	142	7	4	235	31	243	8.00E-06	61.6	246	270	Proteobacteria	Desulfobacteraceae bacterium	2049433	RJP80459.1 hypothetical protein C4522_07625 [Desulfobacteraceae bacterium]
`Fenrir Meg22_1012`	Meg22_1012_scaffold_2kb_scaffold_226_49	(42387..43124)	-1	Lokiarchaeota	Lytic	K22523	SULT6B1; sulfotransferase 6B1 [EC:2.8.2.-]	245	Gene3D	G3DSA:3.40.50.300	P-loop containing nucleotide triphosphate hydrolases	1	245	9.40E-28	TRUE			WP_163352900.1	26.5	249	156	7	1	243	1	228	2.70E-06	63.2	246	236	Proteobacteria	Desulfovibrio sp. JC010	2593641	WP_163352900.1 sulfotransferase domain-containing protein [Desulfovibrio sp. JC010]
`Fenrir Meg22_1012`	Meg22_1012_scaffold_2kb_scaffold_226_49	(42387..43124)	-1	Lokiarchaeota	Lytic	K22523	SULT6B1; sulfotransferase 6B1 [EC:2.8.2.-]	245	Pfam	PF00685	Sulfotransferase domain	3	243	7.70E-14	TRUE	IPR000863	Sulfotransferase domain	RJP80459.1	25.7	241	142	7	4	235	31	243	8.00E-06	61.6	246	270	Proteobacteria	Desulfobacteraceae bacterium	2049433	RJP80459.1 hypothetical protein C4522_07625 [Desulfobacteraceae bacterium]
`Fenrir Meg22_1012`	Meg22_1012_scaffold_2kb_scaffold_226_49	(42387..43124)	-1	Lokiarchaeota	Lytic	K22523	SULT6B1; sulfotransferase 6B1 [EC:2.8.2.-]	245	Pfam	PF00685	Sulfotransferase domain	3	243	7.70E-14	TRUE	IPR000863	Sulfotransferase domain	WP_163352900.1	26.5	249	156	7	1	243	1	228	2.70E-06	63.2	246	236	Proteobacteria	Desulfovibrio sp. JC010	2593641	WP_163352900.1 sulfotransferase domain-containing protein [Desulfovibrio sp. JC010]
`Fenrir Meg22_1012`	Meg22_1012_scaffold_2kb_scaffold_226_50	(43130..43411)	-1	Lokiarchaeota	Lytic	None	hypothetical protein	NA	NA	NA	NA	NA	NA	NA	NA	NA	NA	NA	NA	NA	NA	NA	NA	NA	NA	NA	NA	NA	NA	NA	NA	NA	NA	NA
`Fenrir Meg22_1012`	Meg22_1012_scaffold_2kb_scaffold_226_51	(43634..43879)	-1	Lokiarchaeota	Lytic	None	hypothetical protein	NA	NA	NA	NA	NA	NA	NA	NA	NA	NA	NA	NA	NA	NA	NA	NA	NA	NA	NA	NA	NA	NA	NA	NA	NA	NA	NA
`Fenrir Meg22_1012`	Meg22_1012_scaffold_2kb_scaffold_226_52	(43876..44886)	-1	Lokiarchaeota	Lytic	None	hypothetical protein	336	SUPERFAMILY	SSF56300	Metallo-dependent phosphatases	111	307	7.80E-08	TRUE			WP_177438962.1	27.4	179	111	6	109	272	20	194	1.20E-07	68.2	337	259	Bacteroidetes	Rikenellaceae bacterium	2049048	WP_177438962.1 metallophosphoesterase family protein [Rikenellaceae bacterium]
`Fenrir Meg22_1012`	Meg22_1012_scaffold_2kb_scaffold_226_52	(43876..44886)	-1	Lokiarchaeota	Lytic	None	hypothetical protein	336	SUPERFAMILY	SSF56300	Metallo-dependent phosphatases	111	307	7.80E-08	TRUE			OQA81103.1	26.3	232	164	5	111	336	81	311	5.10E-11	79.3	337	329	0	Microgenomates group bacterium ADurb.Bin238	1852934	OQA81103.1 hypothetical protein BWY29_01056 [Microgenomates group bacterium ADurb.Bin238]
`Fenrir Meg22_1012`	Meg22_1012_scaffold_2kb_scaffold_226_52	(43876..44886)	-1	Lokiarchaeota	Lytic	None	hypothetical protein	336	SUPERFAMILY	SSF56300	Metallo-dependent phosphatases	111	307	7.80E-08	TRUE			PZN41349.1	29.4	228	142	4	110	328	129	346	3.90E-19	106.3	337	370	Firmicutes	Firmicutes bacterium	1879010	PZN41349.1 hypothetical protein DIU70_06670 [Firmicutes bacterium]
`Fenrir Meg22_1012`	Meg22_1012_scaffold_2kb_scaffold_226_52	(43876..44886)	-1	Lokiarchaeota	Lytic	None	hypothetical protein	336	SUPERFAMILY	SSF56300	Metallo-dependent phosphatases	111	307	7.80E-08	TRUE			WP_097160425.1	26.9	331	214	9	22	336	20	338	6.20E-25	125.6	337	347	Firmicutes	Bacillus oleivorans	1448271	WP_097160425.1 metallophosphoesterase [Bacillus oleivorans]
`Fenrir Meg22_1012`	Meg22_1012_scaffold_2kb_scaffold_226_52	(43876..44886)	-1	Lokiarchaeota	Lytic	None	hypothetical protein	336	SUPERFAMILY	SSF56300	Metallo-dependent phosphatases	111	307	7.80E-08	TRUE			WP_041051483.1	29.6	274	176	5	73	336	70	336	5.60E-26	129	337	349	Firmicutes	Paenibacillus sp. VKM B-2647	1590651	WP_041051483.1 metallophosphoesterase [Paenibacillus sp. VKM B-2647]
`Fenrir Meg22_1012`	Meg22_1012_scaffold_2kb_scaffold_226_52	(43876..44886)	-1	Lokiarchaeota	Lytic	None	hypothetical protein	336	SUPERFAMILY	SSF56300	Metallo-dependent phosphatases	111	307	7.80E-08	TRUE			WP_077616944.1	26.9	309	214	5	39	336	23	330	3.30E-26	129.8	337	335	Firmicutes	Caenibacillus caldisaponilyticus	1674942	WP_077616944.1 metallophosphoesterase, partial [Caenibacillus caldisaponilyticus]
`Fenrir Meg22_1012`	Meg22_1012_scaffold_2kb_scaffold_226_52	(43876..44886)	-1	Lokiarchaeota	Lytic	None	hypothetical protein	336	SUPERFAMILY	SSF56300	Metallo-dependent phosphatases	111	307	7.80E-08	TRUE			WP_150948200.1	30.7	296	191	7	48	336	48	336	2.30E-27	133.7	337	348	Firmicutes	Bacillus methanolicus	1471	WP_150948200.1 metallophosphoesterase [Bacillus methanolicus]
`Fenrir Meg22_1012`	Meg22_1012_scaffold_2kb_scaffold_226_52	(43876..44886)	-1	Lokiarchaeota	Lytic	None	hypothetical protein	336	SUPERFAMILY	SSF56300	Metallo-dependent phosphatases	111	307	7.80E-08	TRUE			WP_183041499.1	29.1	323	204	9	28	336	25	336	6.00E-28	135.6	337	347	Firmicutes;Uroviricota	Caldibacillus debilis GB1;Caldibacillus phage CBP1	1339248;2036768	WP_183041499.1 metallophosphoesterase [Caldibacillus debilis]
`Fenrir Meg22_1012`	Meg22_1012_scaffold_2kb_scaffold_226_52	(43876..44886)	-1	Lokiarchaeota	Lytic	None	hypothetical protein	336	SUPERFAMILY	SSF56300	Metallo-dependent phosphatases	111	307	7.80E-08	TRUE			WP_097157222.1	30	243	168	2	95	336	95	336	4.10E-29	139.4	337	345	Firmicutes	Bacillus oleivorans	1448271	WP_097157222.1 hypothetical protein [Bacillus oleivorans]
`Fenrir Meg22_1012`	Meg22_1012_scaffold_2kb_scaffold_226_52	(43876..44886)	-1	Lokiarchaeota	Lytic	None	hypothetical protein	336	SUPERFAMILY	SSF56300	Metallo-dependent phosphatases	111	307	7.80E-08	TRUE			HDY76682.1	35.7	342	206	6	7	336	3	342	1.00E-51	214.5	337	342	N/A	N/A		HDY76682.1 hypothetical protein [archaeon]
`Fenrir Meg22_1012`	Meg22_1012_scaffold_2kb_scaffold_226_53	(44953..46782)	-1	Lokiarchaeota	Lytic	None	hypothetical protein	NA	NA	NA	NA	NA	NA	NA	NA	NA	NA	NA	NA	NA	NA	NA	NA	NA	NA	NA	NA	NA	NA	NA	NA	NA	NA	NA
`Fenrir Meg22_1012`	Meg22_1012_scaffold_2kb_scaffold_226_54	(46782..47405)	-1	Lokiarchaeota	Lytic	None	hypothetical protein	207	Pfam	PF02732	ERCC4 domain	23	114	1.70E-06	TRUE	IPR006166	ERCC4 domain	HDY76684.1	41	205	114	4	3	204	35	235	1.40E-30	143.7	208	239	N/A	N/A		HDY76684.1 hypothetical protein [archaeon]
`Fenrir Meg22_1012`	Meg22_1012_scaffold_2kb_scaffold_226_54	(46782..47405)	-1	Lokiarchaeota	Lytic	None	hypothetical protein	207	Gene3D	G3DSA:3.40.50.10130	NA	24	131	4.90E-08	TRUE			HDY76684.1	41	205	114	4	3	204	35	235	1.40E-30	143.7	208	239	N/A	N/A		HDY76684.1 hypothetical protein [archaeon]
`Fenrir Meg22_1012`	Meg22_1012_scaffold_2kb_scaffold_226_54	(46782..47405)	-1	Lokiarchaeota	Lytic	None	hypothetical protein	207	SUPERFAMILY	SSF52980	Restriction endonuclease-like	29	126	1.85E-08	TRUE	IPR011335	Restriction endonuclease type II-like	HDY76684.1	41	205	114	4	3	204	35	235	1.40E-30	143.7	208	239	N/A	N/A		HDY76684.1 hypothetical protein [archaeon]
`Fenrir Meg22_1012`	Meg22_1012_scaffold_2kb_scaffold_226_54	(46782..47405)	-1	Lokiarchaeota	Lytic	None	hypothetical protein	207	Gene3D	G3DSA:1.10.150.20	5' to 3' exonuclease	148	206	4.70E-07	TRUE			HDY76684.1	41	205	114	4	3	204	35	235	1.40E-30	143.7	208	239	N/A	N/A		HDY76684.1 hypothetical protein [archaeon]
`Fenrir Meg22_1012`	Meg22_1012_scaffold_2kb_scaffold_226_54	(46782..47405)	-1	Lokiarchaeota	Lytic	None	hypothetical protein	207	SUPERFAMILY	SSF47781	NA	152	203	6.12E-06	TRUE	IPR010994	RuvA domain 2-like	HDY76684.1	41	205	114	4	3	204	35	235	1.40E-30	143.7	208	239	N/A	N/A		HDY76684.1 hypothetical protein [archaeon]
`Fenrir Meg22_1012`	Meg22_1012_scaffold_2kb_scaffold_226_54	(46782..47405)	-1	Lokiarchaeota	Lytic	None	hypothetical protein	207	Pfam	PF14520	Helix-hairpin-helix domain	153	204	6.90E-07	TRUE			HDY76684.1	41	205	114	4	3	204	35	235	1.40E-30	143.7	208	239	N/A	N/A		HDY76684.1 hypothetical protein [archaeon]
`Fenrir Meg22_1012`	Meg22_1012_scaffold_2kb_scaffold_226_55	(47497..48060)	-1	Lokiarchaeota	Lytic	K05967	K05967; uncharacterized protein	187	SUPERFAMILY	SSF56784	HAD superfamily/HAD-like	5	174	3.71E-11	TRUE	IPR036412	HAD-like superfamily	TXT65591.1	31.4	194	121	4	4	185	2	195	2.10E-14	89.7	188	195	Candidatus Lokiarchaeota	Candidatus Lokiarchaeota archaeon	2053489	TXT65591.1 putative NT5C domain containing protein [Candidatus Lokiarchaeota archaeon]
`Fenrir Meg22_1012`	Meg22_1012_scaffold_2kb_scaffold_226_55	(47497..48060)	-1	Lokiarchaeota	Lytic	K05967	K05967; uncharacterized protein	187	SUPERFAMILY	SSF56784	HAD superfamily/HAD-like	5	174	3.71E-11	TRUE	IPR036412	HAD-like superfamily	TFF90566.1	31.1	180	114	3	4	173	2	181	3.20E-15	92.4	188	188	Candidatus Lokiarchaeota	Candidatus Lokiarchaeota archaeon	2053489	TFF90566.1 hypothetical protein EU548_02355 [Candidatus Lokiarchaeota archaeon]
`Fenrir Meg22_1012`	Meg22_1012_scaffold_2kb_scaffold_226_55	(47497..48060)	-1	Lokiarchaeota	Lytic	K05967	K05967; uncharacterized protein	187	SUPERFAMILY	SSF56784	HAD superfamily/HAD-like	5	174	3.71E-11	TRUE	IPR036412	HAD-like superfamily	MBD3216148.1	31.1	180	114	3	4	173	2	181	1.50E-15	93.6	188	191	N/A	N/A		MBD3216148.1 hypothetical protein [Candidatus Lokiarchaeota archaeon]
`Fenrir Meg22_1012`	Meg22_1012_scaffold_2kb_scaffold_226_55	(47497..48060)	-1	Lokiarchaeota	Lytic	K05967	K05967; uncharacterized protein	187	SUPERFAMILY	SSF56784	HAD superfamily/HAD-like	5	174	3.71E-11	TRUE	IPR036412	HAD-like superfamily	NHJ24783.1	29.9	187	121	3	4	180	2	188	6.50E-16	94.7	188	189	N/A	N/A		NHJ24783.1 hypothetical protein [Candidatus Lokiarchaeota archaeon]
`Fenrir Meg22_1012`	Meg22_1012_scaffold_2kb_scaffold_226_55	(47497..48060)	-1	Lokiarchaeota	Lytic	K05967	K05967; uncharacterized protein	187	SUPERFAMILY	SSF56784	HAD superfamily/HAD-like	5	174	3.71E-11	TRUE	IPR036412	HAD-like superfamily	TXT56161.1	30.9	181	113	4	4	173	2	181	2.20E-16	96.3	188	190	Candidatus Lokiarchaeota	Candidatus Lokiarchaeota archaeon	2053489	TXT56161.1 hypothetical protein BAJALOKI1v1_1990002 [Candidatus Lokiarchaeota archaeon]
`Fenrir Meg22_1012`	Meg22_1012_scaffold_2kb_scaffold_226_55	(47497..48060)	-1	Lokiarchaeota	Lytic	K05967	K05967; uncharacterized protein	187	SUPERFAMILY	SSF56784	HAD superfamily/HAD-like	5	174	3.71E-11	TRUE	IPR036412	HAD-like superfamily	TFF94238.1	29.9	187	121	3	4	180	2	188	7.70E-17	97.8	188	190	Candidatus Lokiarchaeota	Candidatus Lokiarchaeota archaeon	2053489	TFF94238.1 hypothetical protein EU543_01750 [Candidatus Lokiarchaeota archaeon]
`Fenrir Meg22_1012`	Meg22_1012_scaffold_2kb_scaffold_226_55	(47497..48060)	-1	Lokiarchaeota	Lytic	K05967	K05967; uncharacterized protein	187	SUPERFAMILY	SSF56784	HAD superfamily/HAD-like	5	174	3.71E-11	TRUE	IPR036412	HAD-like superfamily	NVM18358.1	31.5	184	116	3	4	177	2	185	8.20E-19	104.4	188	188	N/A	N/A		NVM18358.1 hypothetical protein [Candidatus Lokiarchaeota archaeon]
`Fenrir Meg22_1012`	Meg22_1012_scaffold_2kb_scaffold_226_55	(47497..48060)	-1	Lokiarchaeota	Lytic	K05967	K05967; uncharacterized protein	187	SUPERFAMILY	SSF56784	HAD superfamily/HAD-like	5	174	3.71E-11	TRUE	IPR036412	HAD-like superfamily	TFF95591.1	33.7	187	114	3	4	180	2	188	7.40E-20	107.8	188	198	Candidatus Lokiarchaeota	Candidatus Lokiarchaeota archaeon	2053489	TFF95591.1 hypothetical protein EU547_07345 [Candidatus Lokiarchaeota archaeon]
`Fenrir Meg22_1012`	Meg22_1012_scaffold_2kb_scaffold_226_55	(47497..48060)	-1	Lokiarchaeota	Lytic	K05967	K05967; uncharacterized protein	187	SUPERFAMILY	SSF56784	HAD superfamily/HAD-like	5	174	3.71E-11	TRUE	IPR036412	HAD-like superfamily	TFG26295.1	34.4	183	108	4	2	173	13	194	2.60E-20	109.4	188	205	Candidatus Lokiarchaeota	Candidatus Lokiarchaeota archaeon	2053489	TFG26295.1 hypothetical protein EU532_10135 [Candidatus Lokiarchaeota archaeon]
`Fenrir Meg22_1012`	Meg22_1012_scaffold_2kb_scaffold_226_55	(47497..48060)	-1	Lokiarchaeota	Lytic	K05967	K05967; uncharacterized protein	187	SUPERFAMILY	SSF56784	HAD superfamily/HAD-like	5	174	3.71E-11	TRUE	IPR036412	HAD-like superfamily	TFG20578.1	33.1	181	109	4	4	173	2	181	1.10E-20	110.5	188	188	Candidatus Lokiarchaeota	Candidatus Lokiarchaeota archaeon	2053489	TFG20578.1 hypothetical protein EU529_14665 [Candidatus Lokiarchaeota archaeon]
`Fenrir Meg22_1012`	Meg22_1012_scaffold_2kb_scaffold_226_55	(47497..48060)	-1	Lokiarchaeota	Lytic	K05967	K05967; uncharacterized protein	187	Gene3D	G3DSA:3.40.50.1000	HAD superfamily/HAD-like	6	172	5.60E-14	TRUE	IPR023214	HAD superfamily	TXT65591.1	31.4	194	121	4	4	185	2	195	2.10E-14	89.7	188	195	Candidatus Lokiarchaeota	Candidatus Lokiarchaeota archaeon	2053489	TXT65591.1 putative NT5C domain containing protein [Candidatus Lokiarchaeota archaeon]
`Fenrir Meg22_1012`	Meg22_1012_scaffold_2kb_scaffold_226_55	(47497..48060)	-1	Lokiarchaeota	Lytic	K05967	K05967; uncharacterized protein	187	Gene3D	G3DSA:3.40.50.1000	HAD superfamily/HAD-like	6	172	5.60E-14	TRUE	IPR023214	HAD superfamily	TFF90566.1	31.1	180	114	3	4	173	2	181	3.20E-15	92.4	188	188	Candidatus Lokiarchaeota	Candidatus Lokiarchaeota archaeon	2053489	TFF90566.1 hypothetical protein EU548_02355 [Candidatus Lokiarchaeota archaeon]
`Fenrir Meg22_1012`	Meg22_1012_scaffold_2kb_scaffold_226_55	(47497..48060)	-1	Lokiarchaeota	Lytic	K05967	K05967; uncharacterized protein	187	Gene3D	G3DSA:3.40.50.1000	HAD superfamily/HAD-like	6	172	5.60E-14	TRUE	IPR023214	HAD superfamily	MBD3216148.1	31.1	180	114	3	4	173	2	181	1.50E-15	93.6	188	191	N/A	N/A		MBD3216148.1 hypothetical protein [Candidatus Lokiarchaeota archaeon]
`Fenrir Meg22_1012`	Meg22_1012_scaffold_2kb_scaffold_226_55	(47497..48060)	-1	Lokiarchaeota	Lytic	K05967	K05967; uncharacterized protein	187	Gene3D	G3DSA:3.40.50.1000	HAD superfamily/HAD-like	6	172	5.60E-14	TRUE	IPR023214	HAD superfamily	NHJ24783.1	29.9	187	121	3	4	180	2	188	6.50E-16	94.7	188	189	N/A	N/A		NHJ24783.1 hypothetical protein [Candidatus Lokiarchaeota archaeon]
`Fenrir Meg22_1012`	Meg22_1012_scaffold_2kb_scaffold_226_55	(47497..48060)	-1	Lokiarchaeota	Lytic	K05967	K05967; uncharacterized protein	187	Gene3D	G3DSA:3.40.50.1000	HAD superfamily/HAD-like	6	172	5.60E-14	TRUE	IPR023214	HAD superfamily	TXT56161.1	30.9	181	113	4	4	173	2	181	2.20E-16	96.3	188	190	Candidatus Lokiarchaeota	Candidatus Lokiarchaeota archaeon	2053489	TXT56161.1 hypothetical protein BAJALOKI1v1_1990002 [Candidatus Lokiarchaeota archaeon]
`Fenrir Meg22_1012`	Meg22_1012_scaffold_2kb_scaffold_226_55	(47497..48060)	-1	Lokiarchaeota	Lytic	K05967	K05967; uncharacterized protein	187	Gene3D	G3DSA:3.40.50.1000	HAD superfamily/HAD-like	6	172	5.60E-14	TRUE	IPR023214	HAD superfamily	TFF94238.1	29.9	187	121	3	4	180	2	188	7.70E-17	97.8	188	190	Candidatus Lokiarchaeota	Candidatus Lokiarchaeota archaeon	2053489	TFF94238.1 hypothetical protein EU543_01750 [Candidatus Lokiarchaeota archaeon]
`Fenrir Meg22_1012`	Meg22_1012_scaffold_2kb_scaffold_226_55	(47497..48060)	-1	Lokiarchaeota	Lytic	K05967	K05967; uncharacterized protein	187	Gene3D	G3DSA:3.40.50.1000	HAD superfamily/HAD-like	6	172	5.60E-14	TRUE	IPR023214	HAD superfamily	NVM18358.1	31.5	184	116	3	4	177	2	185	8.20E-19	104.4	188	188	N/A	N/A		NVM18358.1 hypothetical protein [Candidatus Lokiarchaeota archaeon]
`Fenrir Meg22_1012`	Meg22_1012_scaffold_2kb_scaffold_226_55	(47497..48060)	-1	Lokiarchaeota	Lytic	K05967	K05967; uncharacterized protein	187	Gene3D	G3DSA:3.40.50.1000	HAD superfamily/HAD-like	6	172	5.60E-14	TRUE	IPR023214	HAD superfamily	TFF95591.1	33.7	187	114	3	4	180	2	188	7.40E-20	107.8	188	198	Candidatus Lokiarchaeota	Candidatus Lokiarchaeota archaeon	2053489	TFF95591.1 hypothetical protein EU547_07345 [Candidatus Lokiarchaeota archaeon]
`Fenrir Meg22_1012`	Meg22_1012_scaffold_2kb_scaffold_226_55	(47497..48060)	-1	Lokiarchaeota	Lytic	K05967	K05967; uncharacterized protein	187	Gene3D	G3DSA:3.40.50.1000	HAD superfamily/HAD-like	6	172	5.60E-14	TRUE	IPR023214	HAD superfamily	TFG26295.1	34.4	183	108	4	2	173	13	194	2.60E-20	109.4	188	205	Candidatus Lokiarchaeota	Candidatus Lokiarchaeota archaeon	2053489	TFG26295.1 hypothetical protein EU532_10135 [Candidatus Lokiarchaeota archaeon]
`Fenrir Meg22_1012`	Meg22_1012_scaffold_2kb_scaffold_226_55	(47497..48060)	-1	Lokiarchaeota	Lytic	K05967	K05967; uncharacterized protein	187	Gene3D	G3DSA:3.40.50.1000	HAD superfamily/HAD-like	6	172	5.60E-14	TRUE	IPR023214	HAD superfamily	TFG20578.1	33.1	181	109	4	4	173	2	181	1.10E-20	110.5	188	188	Candidatus Lokiarchaeota	Candidatus Lokiarchaeota archaeon	2053489	TFG20578.1 hypothetical protein EU529_14665 [Candidatus Lokiarchaeota archaeon]
`Fenrir Meg22_1012`	Meg22_1012_scaffold_2kb_scaffold_226_55	(47497..48060)	-1	Lokiarchaeota	Lytic	K05967	K05967; uncharacterized protein	187	Gene3D	G3DSA:1.10.40.40	Deoxyribonucleotidase; domain 2	16	60	5.60E-14	TRUE			TXT65591.1	31.4	194	121	4	4	185	2	195	2.10E-14	89.7	188	195	Candidatus Lokiarchaeota	Candidatus Lokiarchaeota archaeon	2053489	TXT65591.1 putative NT5C domain containing protein [Candidatus Lokiarchaeota archaeon]
`Fenrir Meg22_1012`	Meg22_1012_scaffold_2kb_scaffold_226_55	(47497..48060)	-1	Lokiarchaeota	Lytic	K05967	K05967; uncharacterized protein	187	Gene3D	G3DSA:1.10.40.40	Deoxyribonucleotidase; domain 2	16	60	5.60E-14	TRUE			TFF90566.1	31.1	180	114	3	4	173	2	181	3.20E-15	92.4	188	188	Candidatus Lokiarchaeota	Candidatus Lokiarchaeota archaeon	2053489	TFF90566.1 hypothetical protein EU548_02355 [Candidatus Lokiarchaeota archaeon]
`Fenrir Meg22_1012`	Meg22_1012_scaffold_2kb_scaffold_226_55	(47497..48060)	-1	Lokiarchaeota	Lytic	K05967	K05967; uncharacterized protein	187	Gene3D	G3DSA:1.10.40.40	Deoxyribonucleotidase; domain 2	16	60	5.60E-14	TRUE			MBD3216148.1	31.1	180	114	3	4	173	2	181	1.50E-15	93.6	188	191	N/A	N/A		MBD3216148.1 hypothetical protein [Candidatus Lokiarchaeota archaeon]
`Fenrir Meg22_1012`	Meg22_1012_scaffold_2kb_scaffold_226_55	(47497..48060)	-1	Lokiarchaeota	Lytic	K05967	K05967; uncharacterized protein	187	Gene3D	G3DSA:1.10.40.40	Deoxyribonucleotidase; domain 2	16	60	5.60E-14	TRUE			NHJ24783.1	29.9	187	121	3	4	180	2	188	6.50E-16	94.7	188	189	N/A	N/A		NHJ24783.1 hypothetical protein [Candidatus Lokiarchaeota archaeon]
`Fenrir Meg22_1012`	Meg22_1012_scaffold_2kb_scaffold_226_55	(47497..48060)	-1	Lokiarchaeota	Lytic	K05967	K05967; uncharacterized protein	187	Gene3D	G3DSA:1.10.40.40	Deoxyribonucleotidase; domain 2	16	60	5.60E-14	TRUE			TXT56161.1	30.9	181	113	4	4	173	2	181	2.20E-16	96.3	188	190	Candidatus Lokiarchaeota	Candidatus Lokiarchaeota archaeon	2053489	TXT56161.1 hypothetical protein BAJALOKI1v1_1990002 [Candidatus Lokiarchaeota archaeon]
`Fenrir Meg22_1012`	Meg22_1012_scaffold_2kb_scaffold_226_55	(47497..48060)	-1	Lokiarchaeota	Lytic	K05967	K05967; uncharacterized protein	187	Gene3D	G3DSA:1.10.40.40	Deoxyribonucleotidase; domain 2	16	60	5.60E-14	TRUE			TFF94238.1	29.9	187	121	3	4	180	2	188	7.70E-17	97.8	188	190	Candidatus Lokiarchaeota	Candidatus Lokiarchaeota archaeon	2053489	TFF94238.1 hypothetical protein EU543_01750 [Candidatus Lokiarchaeota archaeon]
`Fenrir Meg22_1012`	Meg22_1012_scaffold_2kb_scaffold_226_55	(47497..48060)	-1	Lokiarchaeota	Lytic	K05967	K05967; uncharacterized protein	187	Gene3D	G3DSA:1.10.40.40	Deoxyribonucleotidase; domain 2	16	60	5.60E-14	TRUE			NVM18358.1	31.5	184	116	3	4	177	2	185	8.20E-19	104.4	188	188	N/A	N/A		NVM18358.1 hypothetical protein [Candidatus Lokiarchaeota archaeon]
`Fenrir Meg22_1012`	Meg22_1012_scaffold_2kb_scaffold_226_55	(47497..48060)	-1	Lokiarchaeota	Lytic	K05967	K05967; uncharacterized protein	187	Gene3D	G3DSA:1.10.40.40	Deoxyribonucleotidase; domain 2	16	60	5.60E-14	TRUE			TFF95591.1	33.7	187	114	3	4	180	2	188	7.40E-20	107.8	188	198	Candidatus Lokiarchaeota	Candidatus Lokiarchaeota archaeon	2053489	TFF95591.1 hypothetical protein EU547_07345 [Candidatus Lokiarchaeota archaeon]
`Fenrir Meg22_1012`	Meg22_1012_scaffold_2kb_scaffold_226_55	(47497..48060)	-1	Lokiarchaeota	Lytic	K05967	K05967; uncharacterized protein	187	Gene3D	G3DSA:1.10.40.40	Deoxyribonucleotidase; domain 2	16	60	5.60E-14	TRUE			TFG26295.1	34.4	183	108	4	2	173	13	194	2.60E-20	109.4	188	205	Candidatus Lokiarchaeota	Candidatus Lokiarchaeota archaeon	2053489	TFG26295.1 hypothetical protein EU532_10135 [Candidatus Lokiarchaeota archaeon]
`Fenrir Meg22_1012`	Meg22_1012_scaffold_2kb_scaffold_226_55	(47497..48060)	-1	Lokiarchaeota	Lytic	K05967	K05967; uncharacterized protein	187	Gene3D	G3DSA:1.10.40.40	Deoxyribonucleotidase; domain 2	16	60	5.60E-14	TRUE			TFG20578.1	33.1	181	109	4	4	173	2	181	1.10E-20	110.5	188	188	Candidatus Lokiarchaeota	Candidatus Lokiarchaeota archaeon	2053489	TFG20578.1 hypothetical protein EU529_14665 [Candidatus Lokiarchaeota archaeon]
`Fenrir Meg22_1012`	Meg22_1012_scaffold_2kb_scaffold_226_56	(48038..49120)	-1	Lokiarchaeota	Lytic	None	hypothetical protein	NA	NA	NA	NA	NA	NA	NA	NA	NA	NA	HHN36799.1	27.7	358	203	12	12	343	19	346	5.10E-17	99.4	361	351	N/A	N/A		HHN36799.1 hypothetical protein [Bacteroidetes bacterium]
`Fenrir Meg22_1012`	Meg22_1012_scaffold_2kb_scaffold_226_57	(49137..50177)	-1	Lokiarchaeota	Lytic	VOG00216	sp|O64262|VG69_BPMD2 Gene 69 protein	346	Pfam	PF12705	PD-(D/E)XK nuclease superfamily	11	184	1.60E-11	TRUE	IPR038726	PD-(D/E)XK endonuclease-like domain, AddAB-type	NA	NA	NA	NA	NA	NA	NA	NA	NA	NA	NA	NA	NA	NA	NA	NA	NA
`Fenrir Meg22_1012`	Meg22_1012_scaffold_2kb_scaffold_226_58	(50303..50590)	-1	Lokiarchaeota	Lytic	None	hypothetical protein	NA	NA	NA	NA	NA	NA	NA	NA	NA	NA	NA	NA	NA	NA	NA	NA	NA	NA	NA	NA	NA	NA	NA	NA	NA	NA	NA
`Fenrir Meg22_1012`	Meg22_1012_scaffold_2kb_scaffold_226_59	(50581..51453)	-1	Lokiarchaeota	Lytic	K06223	dam; DNA adenine methylase [EC:2.1.1.72]	290	PIRSF	PIRSF000398	modification methylase (adenine-specific) M.EcoRV type	1	271	7.10E-39	TRUE	IPR012263	Adenine modification methylase, M.EcoRV-type	WP_045869095.1	27.6	232	144	7	4	230	11	223	6.10E-13	85.5	291	299	Cyanobacteria	Nostocales	1161	WP_045869095.1 MULTISPECIES: DNA adenine methylase [Nostocales]
`Fenrir Meg22_1012`	Meg22_1012_scaffold_2kb_scaffold_226_59	(50581..51453)	-1	Lokiarchaeota	Lytic	K06223	dam; DNA adenine methylase [EC:2.1.1.72]	290	PIRSF	PIRSF000398	modification methylase (adenine-specific) M.EcoRV type	1	271	7.10E-39	TRUE	IPR012263	Adenine modification methylase, M.EcoRV-type	EKF03730.1	27.6	232	144	7	4	230	17	229	6.10E-13	85.5	291	305	Cyanobacteria	Tolypothrix sp. PCC 7601	1188	EKF03730.1 DNA adenine methylase [Tolypothrix sp. PCC 7601]
`Fenrir Meg22_1012`	Meg22_1012_scaffold_2kb_scaffold_226_59	(50581..51453)	-1	Lokiarchaeota	Lytic	K06223	dam; DNA adenine methylase [EC:2.1.1.72]	290	PIRSF	PIRSF000398	modification methylase (adenine-specific) M.EcoRV type	1	271	7.10E-39	TRUE	IPR012263	Adenine modification methylase, M.EcoRV-type	RZD16593.1	25.7	280	184	8	4	275	8	271	3.60E-13	86.3	291	279	Proteobacteria	Candidatus Acididesulfobacter guangdongensis	2597225	RZD16593.1 DNA adenine methylase [Candidatus Acididesulfobacter guangdongensis]
`Fenrir Meg22_1012`	Meg22_1012_scaffold_2kb_scaffold_226_59	(50581..51453)	-1	Lokiarchaeota	Lytic	K06223	dam; DNA adenine methylase [EC:2.1.1.72]	290	PIRSF	PIRSF000398	modification methylase (adenine-specific) M.EcoRV type	1	271	7.10E-39	TRUE	IPR012263	Adenine modification methylase, M.EcoRV-type	OYV97825.1	30.4	194	126	5	1	192	1	187	2.10E-13	87	291	250	Proteobacteria	Deltaproteobacteria bacterium 37-65-8	1970507	OYV97825.1 hypothetical protein B7Z62_05150 [Deltaproteobacteria bacterium 37-65-8]
`Fenrir Meg22_1012`	Meg22_1012_scaffold_2kb_scaffold_226_59	(50581..51453)	-1	Lokiarchaeota	Lytic	K06223	dam; DNA adenine methylase [EC:2.1.1.72]	290	PIRSF	PIRSF000398	modification methylase (adenine-specific) M.EcoRV type	1	271	7.10E-39	TRUE	IPR012263	Adenine modification methylase, M.EcoRV-type	WP_050355090.1	30.4	217	138	6	1	216	1	205	9.40E-14	88.2	291	260	Firmicutes	Gottschalkia purinilytica	1503	WP_050355090.1 DNA adenine methylase [Gottschalkia purinilytica]
`Fenrir Meg22_1012`	Meg22_1012_scaffold_2kb_scaffold_226_59	(50581..51453)	-1	Lokiarchaeota	Lytic	K06223	dam; DNA adenine methylase [EC:2.1.1.72]	290	PIRSF	PIRSF000398	modification methylase (adenine-specific) M.EcoRV type	1	271	7.10E-39	TRUE	IPR012263	Adenine modification methylase, M.EcoRV-type	WP_177272387.1	30.9	220	125	5	6	216	7	208	3.20E-14	89.7	291	288	Firmicutes	Lachnospiraceae bacterium	1898203	WP_177272387.1 DNA adenine methylase [Lachnospiraceae bacterium]
`Fenrir Meg22_1012`	Meg22_1012_scaffold_2kb_scaffold_226_59	(50581..51453)	-1	Lokiarchaeota	Lytic	K06223	dam; DNA adenine methylase [EC:2.1.1.72]	290	PIRSF	PIRSF000398	modification methylase (adenine-specific) M.EcoRV type	1	271	7.10E-39	TRUE	IPR012263	Adenine modification methylase, M.EcoRV-type	WP_066543885.1	30.5	220	126	5	6	216	7	208	1.50E-14	90.9	291	288	Firmicutes	Clostridium sp. AT4	1720194	WP_066543885.1 DNA adenine methylase [Clostridium sp. AT4]
`Fenrir Meg22_1012`	Meg22_1012_scaffold_2kb_scaffold_226_59	(50581..51453)	-1	Lokiarchaeota	Lytic	K06223	dam; DNA adenine methylase [EC:2.1.1.72]	290	PIRSF	PIRSF000398	modification methylase (adenine-specific) M.EcoRV type	1	271	7.10E-39	TRUE	IPR012263	Adenine modification methylase, M.EcoRV-type	WP_161488114.1	26.2	271	186	6	4	268	30	292	1.70E-15	94	291	292	Planctomycetes	Sedimentisphaera cyanobacteriorum	1940790	WP_161488114.1 DNA adenine methylase [Sedimentisphaera cyanobacteriorum]
`Fenrir Meg22_1012`	Meg22_1012_scaffold_2kb_scaffold_226_59	(50581..51453)	-1	Lokiarchaeota	Lytic	K06223	dam; DNA adenine methylase [EC:2.1.1.72]	290	PIRSF	PIRSF000398	modification methylase (adenine-specific) M.EcoRV type	1	271	7.10E-39	TRUE	IPR012263	Adenine modification methylase, M.EcoRV-type	WP_161491634.1	26.9	271	184	6	4	268	30	292	1.20E-16	97.8	291	292	Planctomycetes	Sedimentisphaera salicampi	1941349	WP_161491634.1 DNA adenine methylase [Sedimentisphaera salicampi]
`Fenrir Meg22_1012`	Meg22_1012_scaffold_2kb_scaffold_226_59	(50581..51453)	-1	Lokiarchaeota	Lytic	K06223	dam; DNA adenine methylase [EC:2.1.1.72]	290	PIRSF	PIRSF000398	modification methylase (adenine-specific) M.EcoRV type	1	271	7.10E-39	TRUE	IPR012263	Adenine modification methylase, M.EcoRV-type	WP_152804898.1	28.8	271	174	9	1	268	6	260	4.10E-17	99.4	291	260	Firmicutes	Alkalibaculum sp. M08DMB	2655001	WP_152804898.1 Dam family site-specific DNA-(adenine-N6)-methyltransferase [Alkalibaculum sp. M08DMB]
`Fenrir Meg22_1012`	Meg22_1012_scaffold_2kb_scaffold_226_59	(50581..51453)	-1	Lokiarchaeota	Lytic	K06223	dam; DNA adenine methylase [EC:2.1.1.72]	290	SUPERFAMILY	SSF53335	NA	2	251	7.76E-40	TRUE	IPR029063	S-adenosyl-L-methionine-dependent methyltransferase	WP_045869095.1	27.6	232	144	7	4	230	11	223	6.10E-13	85.5	291	299	Cyanobacteria	Nostocales	1161	WP_045869095.1 MULTISPECIES: DNA adenine methylase [Nostocales]
`Fenrir Meg22_1012`	Meg22_1012_scaffold_2kb_scaffold_226_59	(50581..51453)	-1	Lokiarchaeota	Lytic	K06223	dam; DNA adenine methylase [EC:2.1.1.72]	290	SUPERFAMILY	SSF53335	NA	2	251	7.76E-40	TRUE	IPR029063	S-adenosyl-L-methionine-dependent methyltransferase	EKF03730.1	27.6	232	144	7	4	230	17	229	6.10E-13	85.5	291	305	Cyanobacteria	Tolypothrix sp. PCC 7601	1188	EKF03730.1 DNA adenine methylase [Tolypothrix sp. PCC 7601]
`Fenrir Meg22_1012`	Meg22_1012_scaffold_2kb_scaffold_226_59	(50581..51453)	-1	Lokiarchaeota	Lytic	K06223	dam; DNA adenine methylase [EC:2.1.1.72]	290	SUPERFAMILY	SSF53335	NA	2	251	7.76E-40	TRUE	IPR029063	S-adenosyl-L-methionine-dependent methyltransferase	RZD16593.1	25.7	280	184	8	4	275	8	271	3.60E-13	86.3	291	279	Proteobacteria	Candidatus Acididesulfobacter guangdongensis	2597225	RZD16593.1 DNA adenine methylase [Candidatus Acididesulfobacter guangdongensis]
`Fenrir Meg22_1012`	Meg22_1012_scaffold_2kb_scaffold_226_59	(50581..51453)	-1	Lokiarchaeota	Lytic	K06223	dam; DNA adenine methylase [EC:2.1.1.72]	290	SUPERFAMILY	SSF53335	NA	2	251	7.76E-40	TRUE	IPR029063	S-adenosyl-L-methionine-dependent methyltransferase	OYV97825.1	30.4	194	126	5	1	192	1	187	2.10E-13	87	291	250	Proteobacteria	Deltaproteobacteria bacterium 37-65-8	1970507	OYV97825.1 hypothetical protein B7Z62_05150 [Deltaproteobacteria bacterium 37-65-8]
`Fenrir Meg22_1012`	Meg22_1012_scaffold_2kb_scaffold_226_59	(50581..51453)	-1	Lokiarchaeota	Lytic	K06223	dam; DNA adenine methylase [EC:2.1.1.72]	290	SUPERFAMILY	SSF53335	NA	2	251	7.76E-40	TRUE	IPR029063	S-adenosyl-L-methionine-dependent methyltransferase	WP_050355090.1	30.4	217	138	6	1	216	1	205	9.40E-14	88.2	291	260	Firmicutes	Gottschalkia purinilytica	1503	WP_050355090.1 DNA adenine methylase [Gottschalkia purinilytica]
`Fenrir Meg22_1012`	Meg22_1012_scaffold_2kb_scaffold_226_59	(50581..51453)	-1	Lokiarchaeota	Lytic	K06223	dam; DNA adenine methylase [EC:2.1.1.72]	290	SUPERFAMILY	SSF53335	NA	2	251	7.76E-40	TRUE	IPR029063	S-adenosyl-L-methionine-dependent methyltransferase	WP_177272387.1	30.9	220	125	5	6	216	7	208	3.20E-14	89.7	291	288	Firmicutes	Lachnospiraceae bacterium	1898203	WP_177272387.1 DNA adenine methylase [Lachnospiraceae bacterium]
`Fenrir Meg22_1012`	Meg22_1012_scaffold_2kb_scaffold_226_59	(50581..51453)	-1	Lokiarchaeota	Lytic	K06223	dam; DNA adenine methylase [EC:2.1.1.72]	290	SUPERFAMILY	SSF53335	NA	2	251	7.76E-40	TRUE	IPR029063	S-adenosyl-L-methionine-dependent methyltransferase	WP_066543885.1	30.5	220	126	5	6	216	7	208	1.50E-14	90.9	291	288	Firmicutes	Clostridium sp. AT4	1720194	WP_066543885.1 DNA adenine methylase [Clostridium sp. AT4]
`Fenrir Meg22_1012`	Meg22_1012_scaffold_2kb_scaffold_226_59	(50581..51453)	-1	Lokiarchaeota	Lytic	K06223	dam; DNA adenine methylase [EC:2.1.1.72]	290	SUPERFAMILY	SSF53335	NA	2	251	7.76E-40	TRUE	IPR029063	S-adenosyl-L-methionine-dependent methyltransferase	WP_161488114.1	26.2	271	186	6	4	268	30	292	1.70E-15	94	291	292	Planctomycetes	Sedimentisphaera cyanobacteriorum	1940790	WP_161488114.1 DNA adenine methylase [Sedimentisphaera cyanobacteriorum]
`Fenrir Meg22_1012`	Meg22_1012_scaffold_2kb_scaffold_226_59	(50581..51453)	-1	Lokiarchaeota	Lytic	K06223	dam; DNA adenine methylase [EC:2.1.1.72]	290	SUPERFAMILY	SSF53335	NA	2	251	7.76E-40	TRUE	IPR029063	S-adenosyl-L-methionine-dependent methyltransferase	WP_161491634.1	26.9	271	184	6	4	268	30	292	1.20E-16	97.8	291	292	Planctomycetes	Sedimentisphaera salicampi	1941349	WP_161491634.1 DNA adenine methylase [Sedimentisphaera salicampi]
`Fenrir Meg22_1012`	Meg22_1012_scaffold_2kb_scaffold_226_59	(50581..51453)	-1	Lokiarchaeota	Lytic	K06223	dam; DNA adenine methylase [EC:2.1.1.72]	290	SUPERFAMILY	SSF53335	NA	2	251	7.76E-40	TRUE	IPR029063	S-adenosyl-L-methionine-dependent methyltransferase	WP_152804898.1	28.8	271	174	9	1	268	6	260	4.10E-17	99.4	291	260	Firmicutes	Alkalibaculum sp. M08DMB	2655001	WP_152804898.1 Dam family site-specific DNA-(adenine-N6)-methyltransferase [Alkalibaculum sp. M08DMB]
`Fenrir Meg22_1012`	Meg22_1012_scaffold_2kb_scaffold_226_59	(50581..51453)	-1	Lokiarchaeota	Lytic	K06223	dam; DNA adenine methylase [EC:2.1.1.72]	290	PRINTS	PR00505	D12 class N6 adenine-specific DNA methyltransferase signature	7	23	1.40E-09	TRUE	IPR012327	D12 class N6 adenine-specific DNA methyltransferase	WP_045869095.1	27.6	232	144	7	4	230	11	223	6.10E-13	85.5	291	299	Cyanobacteria	Nostocales	1161	WP_045869095.1 MULTISPECIES: DNA adenine methylase [Nostocales]
`Fenrir Meg22_1012`	Meg22_1012_scaffold_2kb_scaffold_226_59	(50581..51453)	-1	Lokiarchaeota	Lytic	K06223	dam; DNA adenine methylase [EC:2.1.1.72]	290	PRINTS	PR00505	D12 class N6 adenine-specific DNA methyltransferase signature	7	23	1.40E-09	TRUE	IPR012327	D12 class N6 adenine-specific DNA methyltransferase	EKF03730.1	27.6	232	144	7	4	230	17	229	6.10E-13	85.5	291	305	Cyanobacteria	Tolypothrix sp. PCC 7601	1188	EKF03730.1 DNA adenine methylase [Tolypothrix sp. PCC 7601]
`Fenrir Meg22_1012`	Meg22_1012_scaffold_2kb_scaffold_226_59	(50581..51453)	-1	Lokiarchaeota	Lytic	K06223	dam; DNA adenine methylase [EC:2.1.1.72]	290	PRINTS	PR00505	D12 class N6 adenine-specific DNA methyltransferase signature	7	23	1.40E-09	TRUE	IPR012327	D12 class N6 adenine-specific DNA methyltransferase	RZD16593.1	25.7	280	184	8	4	275	8	271	3.60E-13	86.3	291	279	Proteobacteria	Candidatus Acididesulfobacter guangdongensis	2597225	RZD16593.1 DNA adenine methylase [Candidatus Acididesulfobacter guangdongensis]
`Fenrir Meg22_1012`	Meg22_1012_scaffold_2kb_scaffold_226_59	(50581..51453)	-1	Lokiarchaeota	Lytic	K06223	dam; DNA adenine methylase [EC:2.1.1.72]	290	PRINTS	PR00505	D12 class N6 adenine-specific DNA methyltransferase signature	7	23	1.40E-09	TRUE	IPR012327	D12 class N6 adenine-specific DNA methyltransferase	OYV97825.1	30.4	194	126	5	1	192	1	187	2.10E-13	87	291	250	Proteobacteria	Deltaproteobacteria bacterium 37-65-8	1970507	OYV97825.1 hypothetical protein B7Z62_05150 [Deltaproteobacteria bacterium 37-65-8]
`Fenrir Meg22_1012`	Meg22_1012_scaffold_2kb_scaffold_226_59	(50581..51453)	-1	Lokiarchaeota	Lytic	K06223	dam; DNA adenine methylase [EC:2.1.1.72]	290	PRINTS	PR00505	D12 class N6 adenine-specific DNA methyltransferase signature	7	23	1.40E-09	TRUE	IPR012327	D12 class N6 adenine-specific DNA methyltransferase	WP_050355090.1	30.4	217	138	6	1	216	1	205	9.40E-14	88.2	291	260	Firmicutes	Gottschalkia purinilytica	1503	WP_050355090.1 DNA adenine methylase [Gottschalkia purinilytica]
`Fenrir Meg22_1012`	Meg22_1012_scaffold_2kb_scaffold_226_59	(50581..51453)	-1	Lokiarchaeota	Lytic	K06223	dam; DNA adenine methylase [EC:2.1.1.72]	290	PRINTS	PR00505	D12 class N6 adenine-specific DNA methyltransferase signature	7	23	1.40E-09	TRUE	IPR012327	D12 class N6 adenine-specific DNA methyltransferase	WP_177272387.1	30.9	220	125	5	6	216	7	208	3.20E-14	89.7	291	288	Firmicutes	Lachnospiraceae bacterium	1898203	WP_177272387.1 DNA adenine methylase [Lachnospiraceae bacterium]
`Fenrir Meg22_1012`	Meg22_1012_scaffold_2kb_scaffold_226_59	(50581..51453)	-1	Lokiarchaeota	Lytic	K06223	dam; DNA adenine methylase [EC:2.1.1.72]	290	PRINTS	PR00505	D12 class N6 adenine-specific DNA methyltransferase signature	7	23	1.40E-09	TRUE	IPR012327	D12 class N6 adenine-specific DNA methyltransferase	WP_066543885.1	30.5	220	126	5	6	216	7	208	1.50E-14	90.9	291	288	Firmicutes	Clostridium sp. AT4	1720194	WP_066543885.1 DNA adenine methylase [Clostridium sp. AT4]
`Fenrir Meg22_1012`	Meg22_1012_scaffold_2kb_scaffold_226_59	(50581..51453)	-1	Lokiarchaeota	Lytic	K06223	dam; DNA adenine methylase [EC:2.1.1.72]	290	PRINTS	PR00505	D12 class N6 adenine-specific DNA methyltransferase signature	7	23	1.40E-09	TRUE	IPR012327	D12 class N6 adenine-specific DNA methyltransferase	WP_161488114.1	26.2	271	186	6	4	268	30	292	1.70E-15	94	291	292	Planctomycetes	Sedimentisphaera cyanobacteriorum	1940790	WP_161488114.1 DNA adenine methylase [Sedimentisphaera cyanobacteriorum]
`Fenrir Meg22_1012`	Meg22_1012_scaffold_2kb_scaffold_226_59	(50581..51453)	-1	Lokiarchaeota	Lytic	K06223	dam; DNA adenine methylase [EC:2.1.1.72]	290	PRINTS	PR00505	D12 class N6 adenine-specific DNA methyltransferase signature	7	23	1.40E-09	TRUE	IPR012327	D12 class N6 adenine-specific DNA methyltransferase	WP_161491634.1	26.9	271	184	6	4	268	30	292	1.20E-16	97.8	291	292	Planctomycetes	Sedimentisphaera salicampi	1941349	WP_161491634.1 DNA adenine methylase [Sedimentisphaera salicampi]
`Fenrir Meg22_1012`	Meg22_1012_scaffold_2kb_scaffold_226_59	(50581..51453)	-1	Lokiarchaeota	Lytic	K06223	dam; DNA adenine methylase [EC:2.1.1.72]	290	PRINTS	PR00505	D12 class N6 adenine-specific DNA methyltransferase signature	7	23	1.40E-09	TRUE	IPR012327	D12 class N6 adenine-specific DNA methyltransferase	WP_152804898.1	28.8	271	174	9	1	268	6	260	4.10E-17	99.4	291	260	Firmicutes	Alkalibaculum sp. M08DMB	2655001	WP_152804898.1 Dam family site-specific DNA-(adenine-N6)-methyltransferase [Alkalibaculum sp. M08DMB]
`Fenrir Meg22_1012`	Meg22_1012_scaffold_2kb_scaffold_226_59	(50581..51453)	-1	Lokiarchaeota	Lytic	K06223	dam; DNA adenine methylase [EC:2.1.1.72]	290	Gene3D	G3DSA:3.40.50.150	Vaccinia Virus protein VP39	7	231	1.30E-36	TRUE			WP_045869095.1	27.6	232	144	7	4	230	11	223	6.10E-13	85.5	291	299	Cyanobacteria	Nostocales	1161	WP_045869095.1 MULTISPECIES: DNA adenine methylase [Nostocales]
`Fenrir Meg22_1012`	Meg22_1012_scaffold_2kb_scaffold_226_59	(50581..51453)	-1	Lokiarchaeota	Lytic	K06223	dam; DNA adenine methylase [EC:2.1.1.72]	290	Gene3D	G3DSA:3.40.50.150	Vaccinia Virus protein VP39	7	231	1.30E-36	TRUE			EKF03730.1	27.6	232	144	7	4	230	17	229	6.10E-13	85.5	291	305	Cyanobacteria	Tolypothrix sp. PCC 7601	1188	EKF03730.1 DNA adenine methylase [Tolypothrix sp. PCC 7601]
`Fenrir Meg22_1012`	Meg22_1012_scaffold_2kb_scaffold_226_59	(50581..51453)	-1	Lokiarchaeota	Lytic	K06223	dam; DNA adenine methylase [EC:2.1.1.72]	290	Gene3D	G3DSA:3.40.50.150	Vaccinia Virus protein VP39	7	231	1.30E-36	TRUE			RZD16593.1	25.7	280	184	8	4	275	8	271	3.60E-13	86.3	291	279	Proteobacteria	Candidatus Acididesulfobacter guangdongensis	2597225	RZD16593.1 DNA adenine methylase [Candidatus Acididesulfobacter guangdongensis]
`Fenrir Meg22_1012`	Meg22_1012_scaffold_2kb_scaffold_226_59	(50581..51453)	-1	Lokiarchaeota	Lytic	K06223	dam; DNA adenine methylase [EC:2.1.1.72]	290	Gene3D	G3DSA:3.40.50.150	Vaccinia Virus protein VP39	7	231	1.30E-36	TRUE			OYV97825.1	30.4	194	126	5	1	192	1	187	2.10E-13	87	291	250	Proteobacteria	Deltaproteobacteria bacterium 37-65-8	1970507	OYV97825.1 hypothetical protein B7Z62_05150 [Deltaproteobacteria bacterium 37-65-8]
`Fenrir Meg22_1012`	Meg22_1012_scaffold_2kb_scaffold_226_59	(50581..51453)	-1	Lokiarchaeota	Lytic	K06223	dam; DNA adenine methylase [EC:2.1.1.72]	290	Gene3D	G3DSA:3.40.50.150	Vaccinia Virus protein VP39	7	231	1.30E-36	TRUE			WP_050355090.1	30.4	217	138	6	1	216	1	205	9.40E-14	88.2	291	260	Firmicutes	Gottschalkia purinilytica	1503	WP_050355090.1 DNA adenine methylase [Gottschalkia purinilytica]
`Fenrir Meg22_1012`	Meg22_1012_scaffold_2kb_scaffold_226_59	(50581..51453)	-1	Lokiarchaeota	Lytic	K06223	dam; DNA adenine methylase [EC:2.1.1.72]	290	Gene3D	G3DSA:3.40.50.150	Vaccinia Virus protein VP39	7	231	1.30E-36	TRUE			WP_177272387.1	30.9	220	125	5	6	216	7	208	3.20E-14	89.7	291	288	Firmicutes	Lachnospiraceae bacterium	1898203	WP_177272387.1 DNA adenine methylase [Lachnospiraceae bacterium]
`Fenrir Meg22_1012`	Meg22_1012_scaffold_2kb_scaffold_226_59	(50581..51453)	-1	Lokiarchaeota	Lytic	K06223	dam; DNA adenine methylase [EC:2.1.1.72]	290	Gene3D	G3DSA:3.40.50.150	Vaccinia Virus protein VP39	7	231	1.30E-36	TRUE			WP_066543885.1	30.5	220	126	5	6	216	7	208	1.50E-14	90.9	291	288	Firmicutes	Clostridium sp. AT4	1720194	WP_066543885.1 DNA adenine methylase [Clostridium sp. AT4]
`Fenrir Meg22_1012`	Meg22_1012_scaffold_2kb_scaffold_226_59	(50581..51453)	-1	Lokiarchaeota	Lytic	K06223	dam; DNA adenine methylase [EC:2.1.1.72]	290	Gene3D	G3DSA:3.40.50.150	Vaccinia Virus protein VP39	7	231	1.30E-36	TRUE			WP_161488114.1	26.2	271	186	6	4	268	30	292	1.70E-15	94	291	292	Planctomycetes	Sedimentisphaera cyanobacteriorum	1940790	WP_161488114.1 DNA adenine methylase [Sedimentisphaera cyanobacteriorum]
`Fenrir Meg22_1012`	Meg22_1012_scaffold_2kb_scaffold_226_59	(50581..51453)	-1	Lokiarchaeota	Lytic	K06223	dam; DNA adenine methylase [EC:2.1.1.72]	290	Gene3D	G3DSA:3.40.50.150	Vaccinia Virus protein VP39	7	231	1.30E-36	TRUE			WP_161491634.1	26.9	271	184	6	4	268	30	292	1.20E-16	97.8	291	292	Planctomycetes	Sedimentisphaera salicampi	1941349	WP_161491634.1 DNA adenine methylase [Sedimentisphaera salicampi]
`Fenrir Meg22_1012`	Meg22_1012_scaffold_2kb_scaffold_226_59	(50581..51453)	-1	Lokiarchaeota	Lytic	K06223	dam; DNA adenine methylase [EC:2.1.1.72]	290	Gene3D	G3DSA:3.40.50.150	Vaccinia Virus protein VP39	7	231	1.30E-36	TRUE			WP_152804898.1	28.8	271	174	9	1	268	6	260	4.10E-17	99.4	291	260	Firmicutes	Alkalibaculum sp. M08DMB	2655001	WP_152804898.1 Dam family site-specific DNA-(adenine-N6)-methyltransferase [Alkalibaculum sp. M08DMB]
`Fenrir Meg22_1012`	Meg22_1012_scaffold_2kb_scaffold_226_59	(50581..51453)	-1	Lokiarchaeota	Lytic	K06223	dam; DNA adenine methylase [EC:2.1.1.72]	290	Pfam	PF02086	D12 class N6 adenine-specific DNA methyltransferase	7	234	1.80E-21	TRUE	IPR012327	D12 class N6 adenine-specific DNA methyltransferase	WP_045869095.1	27.6	232	144	7	4	230	11	223	6.10E-13	85.5	291	299	Cyanobacteria	Nostocales	1161	WP_045869095.1 MULTISPECIES: DNA adenine methylase [Nostocales]
`Fenrir Meg22_1012`	Meg22_1012_scaffold_2kb_scaffold_226_59	(50581..51453)	-1	Lokiarchaeota	Lytic	K06223	dam; DNA adenine methylase [EC:2.1.1.72]	290	Pfam	PF02086	D12 class N6 adenine-specific DNA methyltransferase	7	234	1.80E-21	TRUE	IPR012327	D12 class N6 adenine-specific DNA methyltransferase	EKF03730.1	27.6	232	144	7	4	230	17	229	6.10E-13	85.5	291	305	Cyanobacteria	Tolypothrix sp. PCC 7601	1188	EKF03730.1 DNA adenine methylase [Tolypothrix sp. PCC 7601]
`Fenrir Meg22_1012`	Meg22_1012_scaffold_2kb_scaffold_226_59	(50581..51453)	-1	Lokiarchaeota	Lytic	K06223	dam; DNA adenine methylase [EC:2.1.1.72]	290	Pfam	PF02086	D12 class N6 adenine-specific DNA methyltransferase	7	234	1.80E-21	TRUE	IPR012327	D12 class N6 adenine-specific DNA methyltransferase	RZD16593.1	25.7	280	184	8	4	275	8	271	3.60E-13	86.3	291	279	Proteobacteria	Candidatus Acididesulfobacter guangdongensis	2597225	RZD16593.1 DNA adenine methylase [Candidatus Acididesulfobacter guangdongensis]
`Fenrir Meg22_1012`	Meg22_1012_scaffold_2kb_scaffold_226_59	(50581..51453)	-1	Lokiarchaeota	Lytic	K06223	dam; DNA adenine methylase [EC:2.1.1.72]	290	Pfam	PF02086	D12 class N6 adenine-specific DNA methyltransferase	7	234	1.80E-21	TRUE	IPR012327	D12 class N6 adenine-specific DNA methyltransferase	OYV97825.1	30.4	194	126	5	1	192	1	187	2.10E-13	87	291	250	Proteobacteria	Deltaproteobacteria bacterium 37-65-8	1970507	OYV97825.1 hypothetical protein B7Z62_05150 [Deltaproteobacteria bacterium 37-65-8]
`Fenrir Meg22_1012`	Meg22_1012_scaffold_2kb_scaffold_226_59	(50581..51453)	-1	Lokiarchaeota	Lytic	K06223	dam; DNA adenine methylase [EC:2.1.1.72]	290	Pfam	PF02086	D12 class N6 adenine-specific DNA methyltransferase	7	234	1.80E-21	TRUE	IPR012327	D12 class N6 adenine-specific DNA methyltransferase	WP_050355090.1	30.4	217	138	6	1	216	1	205	9.40E-14	88.2	291	260	Firmicutes	Gottschalkia purinilytica	1503	WP_050355090.1 DNA adenine methylase [Gottschalkia purinilytica]
`Fenrir Meg22_1012`	Meg22_1012_scaffold_2kb_scaffold_226_59	(50581..51453)	-1	Lokiarchaeota	Lytic	K06223	dam; DNA adenine methylase [EC:2.1.1.72]	290	Pfam	PF02086	D12 class N6 adenine-specific DNA methyltransferase	7	234	1.80E-21	TRUE	IPR012327	D12 class N6 adenine-specific DNA methyltransferase	WP_177272387.1	30.9	220	125	5	6	216	7	208	3.20E-14	89.7	291	288	Firmicutes	Lachnospiraceae bacterium	1898203	WP_177272387.1 DNA adenine methylase [Lachnospiraceae bacterium]
`Fenrir Meg22_1012`	Meg22_1012_scaffold_2kb_scaffold_226_59	(50581..51453)	-1	Lokiarchaeota	Lytic	K06223	dam; DNA adenine methylase [EC:2.1.1.72]	290	Pfam	PF02086	D12 class N6 adenine-specific DNA methyltransferase	7	234	1.80E-21	TRUE	IPR012327	D12 class N6 adenine-specific DNA methyltransferase	WP_066543885.1	30.5	220	126	5	6	216	7	208	1.50E-14	90.9	291	288	Firmicutes	Clostridium sp. AT4	1720194	WP_066543885.1 DNA adenine methylase [Clostridium sp. AT4]
`Fenrir Meg22_1012`	Meg22_1012_scaffold_2kb_scaffold_226_59	(50581..51453)	-1	Lokiarchaeota	Lytic	K06223	dam; DNA adenine methylase [EC:2.1.1.72]	290	Pfam	PF02086	D12 class N6 adenine-specific DNA methyltransferase	7	234	1.80E-21	TRUE	IPR012327	D12 class N6 adenine-specific DNA methyltransferase	WP_161488114.1	26.2	271	186	6	4	268	30	292	1.70E-15	94	291	292	Planctomycetes	Sedimentisphaera cyanobacteriorum	1940790	WP_161488114.1 DNA adenine methylase [Sedimentisphaera cyanobacteriorum]
`Fenrir Meg22_1012`	Meg22_1012_scaffold_2kb_scaffold_226_59	(50581..51453)	-1	Lokiarchaeota	Lytic	K06223	dam; DNA adenine methylase [EC:2.1.1.72]	290	Pfam	PF02086	D12 class N6 adenine-specific DNA methyltransferase	7	234	1.80E-21	TRUE	IPR012327	D12 class N6 adenine-specific DNA methyltransferase	WP_161491634.1	26.9	271	184	6	4	268	30	292	1.20E-16	97.8	291	292	Planctomycetes	Sedimentisphaera salicampi	1941349	WP_161491634.1 DNA adenine methylase [Sedimentisphaera salicampi]
`Fenrir Meg22_1012`	Meg22_1012_scaffold_2kb_scaffold_226_59	(50581..51453)	-1	Lokiarchaeota	Lytic	K06223	dam; DNA adenine methylase [EC:2.1.1.72]	290	Pfam	PF02086	D12 class N6 adenine-specific DNA methyltransferase	7	234	1.80E-21	TRUE	IPR012327	D12 class N6 adenine-specific DNA methyltransferase	WP_152804898.1	28.8	271	174	9	1	268	6	260	4.10E-17	99.4	291	260	Firmicutes	Alkalibaculum sp. M08DMB	2655001	WP_152804898.1 Dam family site-specific DNA-(adenine-N6)-methyltransferase [Alkalibaculum sp. M08DMB]
`Fenrir Meg22_1012`	Meg22_1012_scaffold_2kb_scaffold_226_59	(50581..51453)	-1	Lokiarchaeota	Lytic	K06223	dam; DNA adenine methylase [EC:2.1.1.72]	290	PRINTS	PR00505	D12 class N6 adenine-specific DNA methyltransferase signature	28	42	1.40E-09	TRUE	IPR012327	D12 class N6 adenine-specific DNA methyltransferase	WP_045869095.1	27.6	232	144	7	4	230	11	223	6.10E-13	85.5	291	299	Cyanobacteria	Nostocales	1161	WP_045869095.1 MULTISPECIES: DNA adenine methylase [Nostocales]
`Fenrir Meg22_1012`	Meg22_1012_scaffold_2kb_scaffold_226_59	(50581..51453)	-1	Lokiarchaeota	Lytic	K06223	dam; DNA adenine methylase [EC:2.1.1.72]	290	PRINTS	PR00505	D12 class N6 adenine-specific DNA methyltransferase signature	28	42	1.40E-09	TRUE	IPR012327	D12 class N6 adenine-specific DNA methyltransferase	EKF03730.1	27.6	232	144	7	4	230	17	229	6.10E-13	85.5	291	305	Cyanobacteria	Tolypothrix sp. PCC 7601	1188	EKF03730.1 DNA adenine methylase [Tolypothrix sp. PCC 7601]
`Fenrir Meg22_1012`	Meg22_1012_scaffold_2kb_scaffold_226_59	(50581..51453)	-1	Lokiarchaeota	Lytic	K06223	dam; DNA adenine methylase [EC:2.1.1.72]	290	PRINTS	PR00505	D12 class N6 adenine-specific DNA methyltransferase signature	28	42	1.40E-09	TRUE	IPR012327	D12 class N6 adenine-specific DNA methyltransferase	RZD16593.1	25.7	280	184	8	4	275	8	271	3.60E-13	86.3	291	279	Proteobacteria	Candidatus Acididesulfobacter guangdongensis	2597225	RZD16593.1 DNA adenine methylase [Candidatus Acididesulfobacter guangdongensis]
`Fenrir Meg22_1012`	Meg22_1012_scaffold_2kb_scaffold_226_59	(50581..51453)	-1	Lokiarchaeota	Lytic	K06223	dam; DNA adenine methylase [EC:2.1.1.72]	290	PRINTS	PR00505	D12 class N6 adenine-specific DNA methyltransferase signature	28	42	1.40E-09	TRUE	IPR012327	D12 class N6 adenine-specific DNA methyltransferase	OYV97825.1	30.4	194	126	5	1	192	1	187	2.10E-13	87	291	250	Proteobacteria	Deltaproteobacteria bacterium 37-65-8	1970507	OYV97825.1 hypothetical protein B7Z62_05150 [Deltaproteobacteria bacterium 37-65-8]
`Fenrir Meg22_1012`	Meg22_1012_scaffold_2kb_scaffold_226_59	(50581..51453)	-1	Lokiarchaeota	Lytic	K06223	dam; DNA adenine methylase [EC:2.1.1.72]	290	PRINTS	PR00505	D12 class N6 adenine-specific DNA methyltransferase signature	28	42	1.40E-09	TRUE	IPR012327	D12 class N6 adenine-specific DNA methyltransferase	WP_050355090.1	30.4	217	138	6	1	216	1	205	9.40E-14	88.2	291	260	Firmicutes	Gottschalkia purinilytica	1503	WP_050355090.1 DNA adenine methylase [Gottschalkia purinilytica]
`Fenrir Meg22_1012`	Meg22_1012_scaffold_2kb_scaffold_226_59	(50581..51453)	-1	Lokiarchaeota	Lytic	K06223	dam; DNA adenine methylase [EC:2.1.1.72]	290	PRINTS	PR00505	D12 class N6 adenine-specific DNA methyltransferase signature	28	42	1.40E-09	TRUE	IPR012327	D12 class N6 adenine-specific DNA methyltransferase	WP_177272387.1	30.9	220	125	5	6	216	7	208	3.20E-14	89.7	291	288	Firmicutes	Lachnospiraceae bacterium	1898203	WP_177272387.1 DNA adenine methylase [Lachnospiraceae bacterium]
`Fenrir Meg22_1012`	Meg22_1012_scaffold_2kb_scaffold_226_59	(50581..51453)	-1	Lokiarchaeota	Lytic	K06223	dam; DNA adenine methylase [EC:2.1.1.72]	290	PRINTS	PR00505	D12 class N6 adenine-specific DNA methyltransferase signature	28	42	1.40E-09	TRUE	IPR012327	D12 class N6 adenine-specific DNA methyltransferase	WP_066543885.1	30.5	220	126	5	6	216	7	208	1.50E-14	90.9	291	288	Firmicutes	Clostridium sp. AT4	1720194	WP_066543885.1 DNA adenine methylase [Clostridium sp. AT4]
`Fenrir Meg22_1012`	Meg22_1012_scaffold_2kb_scaffold_226_59	(50581..51453)	-1	Lokiarchaeota	Lytic	K06223	dam; DNA adenine methylase [EC:2.1.1.72]	290	PRINTS	PR00505	D12 class N6 adenine-specific DNA methyltransferase signature	28	42	1.40E-09	TRUE	IPR012327	D12 class N6 adenine-specific DNA methyltransferase	WP_161488114.1	26.2	271	186	6	4	268	30	292	1.70E-15	94	291	292	Planctomycetes	Sedimentisphaera cyanobacteriorum	1940790	WP_161488114.1 DNA adenine methylase [Sedimentisphaera cyanobacteriorum]
`Fenrir Meg22_1012`	Meg22_1012_scaffold_2kb_scaffold_226_59	(50581..51453)	-1	Lokiarchaeota	Lytic	K06223	dam; DNA adenine methylase [EC:2.1.1.72]	290	PRINTS	PR00505	D12 class N6 adenine-specific DNA methyltransferase signature	28	42	1.40E-09	TRUE	IPR012327	D12 class N6 adenine-specific DNA methyltransferase	WP_161491634.1	26.9	271	184	6	4	268	30	292	1.20E-16	97.8	291	292	Planctomycetes	Sedimentisphaera salicampi	1941349	WP_161491634.1 DNA adenine methylase [Sedimentisphaera salicampi]
`Fenrir Meg22_1012`	Meg22_1012_scaffold_2kb_scaffold_226_59	(50581..51453)	-1	Lokiarchaeota	Lytic	K06223	dam; DNA adenine methylase [EC:2.1.1.72]	290	PRINTS	PR00505	D12 class N6 adenine-specific DNA methyltransferase signature	28	42	1.40E-09	TRUE	IPR012327	D12 class N6 adenine-specific DNA methyltransferase	WP_152804898.1	28.8	271	174	9	1	268	6	260	4.10E-17	99.4	291	260	Firmicutes	Alkalibaculum sp. M08DMB	2655001	WP_152804898.1 Dam family site-specific DNA-(adenine-N6)-methyltransferase [Alkalibaculum sp. M08DMB]
`Fenrir Meg22_1012`	Meg22_1012_scaffold_2kb_scaffold_226_59	(50581..51453)	-1	Lokiarchaeota	Lytic	K06223	dam; DNA adenine methylase [EC:2.1.1.72]	290	PRINTS	PR00505	D12 class N6 adenine-specific DNA methyltransferase signature	48	61	1.40E-09	TRUE	IPR012327	D12 class N6 adenine-specific DNA methyltransferase	WP_045869095.1	27.6	232	144	7	4	230	11	223	6.10E-13	85.5	291	299	Cyanobacteria	Nostocales	1161	WP_045869095.1 MULTISPECIES: DNA adenine methylase [Nostocales]
`Fenrir Meg22_1012`	Meg22_1012_scaffold_2kb_scaffold_226_59	(50581..51453)	-1	Lokiarchaeota	Lytic	K06223	dam; DNA adenine methylase [EC:2.1.1.72]	290	PRINTS	PR00505	D12 class N6 adenine-specific DNA methyltransferase signature	48	61	1.40E-09	TRUE	IPR012327	D12 class N6 adenine-specific DNA methyltransferase	EKF03730.1	27.6	232	144	7	4	230	17	229	6.10E-13	85.5	291	305	Cyanobacteria	Tolypothrix sp. PCC 7601	1188	EKF03730.1 DNA adenine methylase [Tolypothrix sp. PCC 7601]
`Fenrir Meg22_1012`	Meg22_1012_scaffold_2kb_scaffold_226_59	(50581..51453)	-1	Lokiarchaeota	Lytic	K06223	dam; DNA adenine methylase [EC:2.1.1.72]	290	PRINTS	PR00505	D12 class N6 adenine-specific DNA methyltransferase signature	48	61	1.40E-09	TRUE	IPR012327	D12 class N6 adenine-specific DNA methyltransferase	RZD16593.1	25.7	280	184	8	4	275	8	271	3.60E-13	86.3	291	279	Proteobacteria	Candidatus Acididesulfobacter guangdongensis	2597225	RZD16593.1 DNA adenine methylase [Candidatus Acididesulfobacter guangdongensis]
`Fenrir Meg22_1012`	Meg22_1012_scaffold_2kb_scaffold_226_59	(50581..51453)	-1	Lokiarchaeota	Lytic	K06223	dam; DNA adenine methylase [EC:2.1.1.72]	290	PRINTS	PR00505	D12 class N6 adenine-specific DNA methyltransferase signature	48	61	1.40E-09	TRUE	IPR012327	D12 class N6 adenine-specific DNA methyltransferase	OYV97825.1	30.4	194	126	5	1	192	1	187	2.10E-13	87	291	250	Proteobacteria	Deltaproteobacteria bacterium 37-65-8	1970507	OYV97825.1 hypothetical protein B7Z62_05150 [Deltaproteobacteria bacterium 37-65-8]
`Fenrir Meg22_1012`	Meg22_1012_scaffold_2kb_scaffold_226_59	(50581..51453)	-1	Lokiarchaeota	Lytic	K06223	dam; DNA adenine methylase [EC:2.1.1.72]	290	PRINTS	PR00505	D12 class N6 adenine-specific DNA methyltransferase signature	48	61	1.40E-09	TRUE	IPR012327	D12 class N6 adenine-specific DNA methyltransferase	WP_050355090.1	30.4	217	138	6	1	216	1	205	9.40E-14	88.2	291	260	Firmicutes	Gottschalkia purinilytica	1503	WP_050355090.1 DNA adenine methylase [Gottschalkia purinilytica]
`Fenrir Meg22_1012`	Meg22_1012_scaffold_2kb_scaffold_226_59	(50581..51453)	-1	Lokiarchaeota	Lytic	K06223	dam; DNA adenine methylase [EC:2.1.1.72]	290	PRINTS	PR00505	D12 class N6 adenine-specific DNA methyltransferase signature	48	61	1.40E-09	TRUE	IPR012327	D12 class N6 adenine-specific DNA methyltransferase	WP_177272387.1	30.9	220	125	5	6	216	7	208	3.20E-14	89.7	291	288	Firmicutes	Lachnospiraceae bacterium	1898203	WP_177272387.1 DNA adenine methylase [Lachnospiraceae bacterium]
`Fenrir Meg22_1012`	Meg22_1012_scaffold_2kb_scaffold_226_59	(50581..51453)	-1	Lokiarchaeota	Lytic	K06223	dam; DNA adenine methylase [EC:2.1.1.72]	290	PRINTS	PR00505	D12 class N6 adenine-specific DNA methyltransferase signature	48	61	1.40E-09	TRUE	IPR012327	D12 class N6 adenine-specific DNA methyltransferase	WP_066543885.1	30.5	220	126	5	6	216	7	208	1.50E-14	90.9	291	288	Firmicutes	Clostridium sp. AT4	1720194	WP_066543885.1 DNA adenine methylase [Clostridium sp. AT4]
`Fenrir Meg22_1012`	Meg22_1012_scaffold_2kb_scaffold_226_59	(50581..51453)	-1	Lokiarchaeota	Lytic	K06223	dam; DNA adenine methylase [EC:2.1.1.72]	290	PRINTS	PR00505	D12 class N6 adenine-specific DNA methyltransferase signature	48	61	1.40E-09	TRUE	IPR012327	D12 class N6 adenine-specific DNA methyltransferase	WP_161488114.1	26.2	271	186	6	4	268	30	292	1.70E-15	94	291	292	Planctomycetes	Sedimentisphaera cyanobacteriorum	1940790	WP_161488114.1 DNA adenine methylase [Sedimentisphaera cyanobacteriorum]
`Fenrir Meg22_1012`	Meg22_1012_scaffold_2kb_scaffold_226_59	(50581..51453)	-1	Lokiarchaeota	Lytic	K06223	dam; DNA adenine methylase [EC:2.1.1.72]	290	PRINTS	PR00505	D12 class N6 adenine-specific DNA methyltransferase signature	48	61	1.40E-09	TRUE	IPR012327	D12 class N6 adenine-specific DNA methyltransferase	WP_161491634.1	26.9	271	184	6	4	268	30	292	1.20E-16	97.8	291	292	Planctomycetes	Sedimentisphaera salicampi	1941349	WP_161491634.1 DNA adenine methylase [Sedimentisphaera salicampi]
`Fenrir Meg22_1012`	Meg22_1012_scaffold_2kb_scaffold_226_59	(50581..51453)	-1	Lokiarchaeota	Lytic	K06223	dam; DNA adenine methylase [EC:2.1.1.72]	290	PRINTS	PR00505	D12 class N6 adenine-specific DNA methyltransferase signature	48	61	1.40E-09	TRUE	IPR012327	D12 class N6 adenine-specific DNA methyltransferase	WP_152804898.1	28.8	271	174	9	1	268	6	260	4.10E-17	99.4	291	260	Firmicutes	Alkalibaculum sp. M08DMB	2655001	WP_152804898.1 Dam family site-specific DNA-(adenine-N6)-methyltransferase [Alkalibaculum sp. M08DMB]
`Fenrir Meg22_1012`	Meg22_1012_scaffold_2kb_scaffold_226_59	(50581..51453)	-1	Lokiarchaeota	Lytic	K06223	dam; DNA adenine methylase [EC:2.1.1.72]	290	Gene3D	G3DSA:1.10.1020.10	Adenine-specific Methyltransferase	55	156	1.30E-36	TRUE	IPR023095	Adenine-specific methyltransferase, domain 2	WP_045869095.1	27.6	232	144	7	4	230	11	223	6.10E-13	85.5	291	299	Cyanobacteria	Nostocales	1161	WP_045869095.1 MULTISPECIES: DNA adenine methylase [Nostocales]
`Fenrir Meg22_1012`	Meg22_1012_scaffold_2kb_scaffold_226_59	(50581..51453)	-1	Lokiarchaeota	Lytic	K06223	dam; DNA adenine methylase [EC:2.1.1.72]	290	Gene3D	G3DSA:1.10.1020.10	Adenine-specific Methyltransferase	55	156	1.30E-36	TRUE	IPR023095	Adenine-specific methyltransferase, domain 2	EKF03730.1	27.6	232	144	7	4	230	17	229	6.10E-13	85.5	291	305	Cyanobacteria	Tolypothrix sp. PCC 7601	1188	EKF03730.1 DNA adenine methylase [Tolypothrix sp. PCC 7601]
`Fenrir Meg22_1012`	Meg22_1012_scaffold_2kb_scaffold_226_59	(50581..51453)	-1	Lokiarchaeota	Lytic	K06223	dam; DNA adenine methylase [EC:2.1.1.72]	290	Gene3D	G3DSA:1.10.1020.10	Adenine-specific Methyltransferase	55	156	1.30E-36	TRUE	IPR023095	Adenine-specific methyltransferase, domain 2	RZD16593.1	25.7	280	184	8	4	275	8	271	3.60E-13	86.3	291	279	Proteobacteria	Candidatus Acididesulfobacter guangdongensis	2597225	RZD16593.1 DNA adenine methylase [Candidatus Acididesulfobacter guangdongensis]
`Fenrir Meg22_1012`	Meg22_1012_scaffold_2kb_scaffold_226_59	(50581..51453)	-1	Lokiarchaeota	Lytic	K06223	dam; DNA adenine methylase [EC:2.1.1.72]	290	Gene3D	G3DSA:1.10.1020.10	Adenine-specific Methyltransferase	55	156	1.30E-36	TRUE	IPR023095	Adenine-specific methyltransferase, domain 2	OYV97825.1	30.4	194	126	5	1	192	1	187	2.10E-13	87	291	250	Proteobacteria	Deltaproteobacteria bacterium 37-65-8	1970507	OYV97825.1 hypothetical protein B7Z62_05150 [Deltaproteobacteria bacterium 37-65-8]
`Fenrir Meg22_1012`	Meg22_1012_scaffold_2kb_scaffold_226_59	(50581..51453)	-1	Lokiarchaeota	Lytic	K06223	dam; DNA adenine methylase [EC:2.1.1.72]	290	Gene3D	G3DSA:1.10.1020.10	Adenine-specific Methyltransferase	55	156	1.30E-36	TRUE	IPR023095	Adenine-specific methyltransferase, domain 2	WP_050355090.1	30.4	217	138	6	1	216	1	205	9.40E-14	88.2	291	260	Firmicutes	Gottschalkia purinilytica	1503	WP_050355090.1 DNA adenine methylase [Gottschalkia purinilytica]
`Fenrir Meg22_1012`	Meg22_1012_scaffold_2kb_scaffold_226_59	(50581..51453)	-1	Lokiarchaeota	Lytic	K06223	dam; DNA adenine methylase [EC:2.1.1.72]	290	Gene3D	G3DSA:1.10.1020.10	Adenine-specific Methyltransferase	55	156	1.30E-36	TRUE	IPR023095	Adenine-specific methyltransferase, domain 2	WP_177272387.1	30.9	220	125	5	6	216	7	208	3.20E-14	89.7	291	288	Firmicutes	Lachnospiraceae bacterium	1898203	WP_177272387.1 DNA adenine methylase [Lachnospiraceae bacterium]
`Fenrir Meg22_1012`	Meg22_1012_scaffold_2kb_scaffold_226_59	(50581..51453)	-1	Lokiarchaeota	Lytic	K06223	dam; DNA adenine methylase [EC:2.1.1.72]	290	Gene3D	G3DSA:1.10.1020.10	Adenine-specific Methyltransferase	55	156	1.30E-36	TRUE	IPR023095	Adenine-specific methyltransferase, domain 2	WP_066543885.1	30.5	220	126	5	6	216	7	208	1.50E-14	90.9	291	288	Firmicutes	Clostridium sp. AT4	1720194	WP_066543885.1 DNA adenine methylase [Clostridium sp. AT4]
`Fenrir Meg22_1012`	Meg22_1012_scaffold_2kb_scaffold_226_59	(50581..51453)	-1	Lokiarchaeota	Lytic	K06223	dam; DNA adenine methylase [EC:2.1.1.72]	290	Gene3D	G3DSA:1.10.1020.10	Adenine-specific Methyltransferase	55	156	1.30E-36	TRUE	IPR023095	Adenine-specific methyltransferase, domain 2	WP_161488114.1	26.2	271	186	6	4	268	30	292	1.70E-15	94	291	292	Planctomycetes	Sedimentisphaera cyanobacteriorum	1940790	WP_161488114.1 DNA adenine methylase [Sedimentisphaera cyanobacteriorum]
`Fenrir Meg22_1012`	Meg22_1012_scaffold_2kb_scaffold_226_59	(50581..51453)	-1	Lokiarchaeota	Lytic	K06223	dam; DNA adenine methylase [EC:2.1.1.72]	290	Gene3D	G3DSA:1.10.1020.10	Adenine-specific Methyltransferase	55	156	1.30E-36	TRUE	IPR023095	Adenine-specific methyltransferase, domain 2	WP_161491634.1	26.9	271	184	6	4	268	30	292	1.20E-16	97.8	291	292	Planctomycetes	Sedimentisphaera salicampi	1941349	WP_161491634.1 DNA adenine methylase [Sedimentisphaera salicampi]
`Fenrir Meg22_1012`	Meg22_1012_scaffold_2kb_scaffold_226_59	(50581..51453)	-1	Lokiarchaeota	Lytic	K06223	dam; DNA adenine methylase [EC:2.1.1.72]	290	Gene3D	G3DSA:1.10.1020.10	Adenine-specific Methyltransferase	55	156	1.30E-36	TRUE	IPR023095	Adenine-specific methyltransferase, domain 2	WP_152804898.1	28.8	271	174	9	1	268	6	260	4.10E-17	99.4	291	260	Firmicutes	Alkalibaculum sp. M08DMB	2655001	WP_152804898.1 Dam family site-specific DNA-(adenine-N6)-methyltransferase [Alkalibaculum sp. M08DMB]
`Fenrir Meg22_1012`	Meg22_1012_scaffold_2kb_scaffold_226_59	(50581..51453)	-1	Lokiarchaeota	Lytic	K06223	dam; DNA adenine methylase [EC:2.1.1.72]	290	PRINTS	PR00505	D12 class N6 adenine-specific DNA methyltransferase signature	177	189	1.40E-09	TRUE	IPR012327	D12 class N6 adenine-specific DNA methyltransferase	WP_045869095.1	27.6	232	144	7	4	230	11	223	6.10E-13	85.5	291	299	Cyanobacteria	Nostocales	1161	WP_045869095.1 MULTISPECIES: DNA adenine methylase [Nostocales]
`Fenrir Meg22_1012`	Meg22_1012_scaffold_2kb_scaffold_226_59	(50581..51453)	-1	Lokiarchaeota	Lytic	K06223	dam; DNA adenine methylase [EC:2.1.1.72]	290	PRINTS	PR00505	D12 class N6 adenine-specific DNA methyltransferase signature	177	189	1.40E-09	TRUE	IPR012327	D12 class N6 adenine-specific DNA methyltransferase	EKF03730.1	27.6	232	144	7	4	230	17	229	6.10E-13	85.5	291	305	Cyanobacteria	Tolypothrix sp. PCC 7601	1188	EKF03730.1 DNA adenine methylase [Tolypothrix sp. PCC 7601]
`Fenrir Meg22_1012`	Meg22_1012_scaffold_2kb_scaffold_226_59	(50581..51453)	-1	Lokiarchaeota	Lytic	K06223	dam; DNA adenine methylase [EC:2.1.1.72]	290	PRINTS	PR00505	D12 class N6 adenine-specific DNA methyltransferase signature	177	189	1.40E-09	TRUE	IPR012327	D12 class N6 adenine-specific DNA methyltransferase	RZD16593.1	25.7	280	184	8	4	275	8	271	3.60E-13	86.3	291	279	Proteobacteria	Candidatus Acididesulfobacter guangdongensis	2597225	RZD16593.1 DNA adenine methylase [Candidatus Acididesulfobacter guangdongensis]
`Fenrir Meg22_1012`	Meg22_1012_scaffold_2kb_scaffold_226_59	(50581..51453)	-1	Lokiarchaeota	Lytic	K06223	dam; DNA adenine methylase [EC:2.1.1.72]	290	PRINTS	PR00505	D12 class N6 adenine-specific DNA methyltransferase signature	177	189	1.40E-09	TRUE	IPR012327	D12 class N6 adenine-specific DNA methyltransferase	OYV97825.1	30.4	194	126	5	1	192	1	187	2.10E-13	87	291	250	Proteobacteria	Deltaproteobacteria bacterium 37-65-8	1970507	OYV97825.1 hypothetical protein B7Z62_05150 [Deltaproteobacteria bacterium 37-65-8]
`Fenrir Meg22_1012`	Meg22_1012_scaffold_2kb_scaffold_226_59	(50581..51453)	-1	Lokiarchaeota	Lytic	K06223	dam; DNA adenine methylase [EC:2.1.1.72]	290	PRINTS	PR00505	D12 class N6 adenine-specific DNA methyltransferase signature	177	189	1.40E-09	TRUE	IPR012327	D12 class N6 adenine-specific DNA methyltransferase	WP_050355090.1	30.4	217	138	6	1	216	1	205	9.40E-14	88.2	291	260	Firmicutes	Gottschalkia purinilytica	1503	WP_050355090.1 DNA adenine methylase [Gottschalkia purinilytica]
`Fenrir Meg22_1012`	Meg22_1012_scaffold_2kb_scaffold_226_59	(50581..51453)	-1	Lokiarchaeota	Lytic	K06223	dam; DNA adenine methylase [EC:2.1.1.72]	290	PRINTS	PR00505	D12 class N6 adenine-specific DNA methyltransferase signature	177	189	1.40E-09	TRUE	IPR012327	D12 class N6 adenine-specific DNA methyltransferase	WP_177272387.1	30.9	220	125	5	6	216	7	208	3.20E-14	89.7	291	288	Firmicutes	Lachnospiraceae bacterium	1898203	WP_177272387.1 DNA adenine methylase [Lachnospiraceae bacterium]
`Fenrir Meg22_1012`	Meg22_1012_scaffold_2kb_scaffold_226_59	(50581..51453)	-1	Lokiarchaeota	Lytic	K06223	dam; DNA adenine methylase [EC:2.1.1.72]	290	PRINTS	PR00505	D12 class N6 adenine-specific DNA methyltransferase signature	177	189	1.40E-09	TRUE	IPR012327	D12 class N6 adenine-specific DNA methyltransferase	WP_066543885.1	30.5	220	126	5	6	216	7	208	1.50E-14	90.9	291	288	Firmicutes	Clostridium sp. AT4	1720194	WP_066543885.1 DNA adenine methylase [Clostridium sp. AT4]
`Fenrir Meg22_1012`	Meg22_1012_scaffold_2kb_scaffold_226_59	(50581..51453)	-1	Lokiarchaeota	Lytic	K06223	dam; DNA adenine methylase [EC:2.1.1.72]	290	PRINTS	PR00505	D12 class N6 adenine-specific DNA methyltransferase signature	177	189	1.40E-09	TRUE	IPR012327	D12 class N6 adenine-specific DNA methyltransferase	WP_161488114.1	26.2	271	186	6	4	268	30	292	1.70E-15	94	291	292	Planctomycetes	Sedimentisphaera cyanobacteriorum	1940790	WP_161488114.1 DNA adenine methylase [Sedimentisphaera cyanobacteriorum]
`Fenrir Meg22_1012`	Meg22_1012_scaffold_2kb_scaffold_226_59	(50581..51453)	-1	Lokiarchaeota	Lytic	K06223	dam; DNA adenine methylase [EC:2.1.1.72]	290	PRINTS	PR00505	D12 class N6 adenine-specific DNA methyltransferase signature	177	189	1.40E-09	TRUE	IPR012327	D12 class N6 adenine-specific DNA methyltransferase	WP_161491634.1	26.9	271	184	6	4	268	30	292	1.20E-16	97.8	291	292	Planctomycetes	Sedimentisphaera salicampi	1941349	WP_161491634.1 DNA adenine methylase [Sedimentisphaera salicampi]
`Fenrir Meg22_1012`	Meg22_1012_scaffold_2kb_scaffold_226_59	(50581..51453)	-1	Lokiarchaeota	Lytic	K06223	dam; DNA adenine methylase [EC:2.1.1.72]	290	PRINTS	PR00505	D12 class N6 adenine-specific DNA methyltransferase signature	177	189	1.40E-09	TRUE	IPR012327	D12 class N6 adenine-specific DNA methyltransferase	WP_152804898.1	28.8	271	174	9	1	268	6	260	4.10E-17	99.4	291	260	Firmicutes	Alkalibaculum sp. M08DMB	2655001	WP_152804898.1 Dam family site-specific DNA-(adenine-N6)-methyltransferase [Alkalibaculum sp. M08DMB]
`Fenrir Meg22_1012`	Meg22_1012_scaffold_2kb_scaffold_226_60	(51474..52487)	-1	Lokiarchaeota	Lytic	K00558	DNMT1, dcm; DNA (cytosine-5)-methyltransferase 1 [EC:2.1.1.37]	337	PRINTS	PR00105	Cytosine-specific DNA methyltransferase signature	5	21	3.90E-08	TRUE	IPR001525	C-5 cytosine methyltransferase	KZE95855.1	34.4	352	189	10	5	324	3	344	3.10E-40	176.4	338	349	Firmicutes	Geobacillus stearothermophilus	1422	KZE95855.1 Modification methylase BspRI [Geobacillus stearothermophilus]
`Fenrir Meg22_1012`	Meg22_1012_scaffold_2kb_scaffold_226_60	(51474..52487)	-1	Lokiarchaeota	Lytic	K00558	DNMT1, dcm; DNA (cytosine-5)-methyltransferase 1 [EC:2.1.1.37]	337	PRINTS	PR00105	Cytosine-specific DNA methyltransferase signature	5	21	3.90E-08	TRUE	IPR001525	C-5 cytosine methyltransferase	WP_094484886.1	35.7	347	183	9	6	324	7	341	1.80E-40	177.2	338	345	Bacteroidetes	Flavobacterium aurantiibacter	2023067	WP_094484886.1 DNA cytosine methyltransferase [Flavobacterium aurantiibacter]
`Fenrir Meg22_1012`	Meg22_1012_scaffold_2kb_scaffold_226_60	(51474..52487)	-1	Lokiarchaeota	Lytic	K00558	DNMT1, dcm; DNA (cytosine-5)-methyltransferase 1 [EC:2.1.1.37]	337	PRINTS	PR00105	Cytosine-specific DNA methyltransferase signature	5	21	3.90E-08	TRUE	IPR001525	C-5 cytosine methyltransferase	WP_190403066.1	33.3	351	194	10	4	326	5	343	6.20E-41	178.7	338	345	N/A	N/A		WP_190403066.1 DNA (cytosine-5-)-methyltransferase [Pseudanabaena sp. FACHB-723]
`Fenrir Meg22_1012`	Meg22_1012_scaffold_2kb_scaffold_226_60	(51474..52487)	-1	Lokiarchaeota	Lytic	K00558	DNMT1, dcm; DNA (cytosine-5)-methyltransferase 1 [EC:2.1.1.37]	337	PRINTS	PR00105	Cytosine-specific DNA methyltransferase signature	5	21	3.90E-08	TRUE	IPR001525	C-5 cytosine methyltransferase	RPH31553.1	33.5	343	192	8	6	321	8	341	6.20E-41	178.7	338	350	Bacteroidetes	Bacteroidales bacterium	2030927	RPH31553.1 DNA cytosine methyltransferase [Bacteroidales bacterium]
`Fenrir Meg22_1012`	Meg22_1012_scaffold_2kb_scaffold_226_60	(51474..52487)	-1	Lokiarchaeota	Lytic	K00558	DNMT1, dcm; DNA (cytosine-5)-methyltransferase 1 [EC:2.1.1.37]	337	PRINTS	PR00105	Cytosine-specific DNA methyltransferase signature	5	21	3.90E-08	TRUE	IPR001525	C-5 cytosine methyltransferase	OGL72042.1	35	351	189	12	2	324	5	344	6.20E-41	178.7	338	353	Candidatus Uhrbacteria	Candidatus Uhrbacteria bacterium RIFCSPHIGHO2_02_FULL_53_13	1802389	OGL72042.1 DNA (cytosine-5-)-methyltransferase [Candidatus Uhrbacteria bacterium RIFCSPHIGHO2_02_FULL_53_13]
`Fenrir Meg22_1012`	Meg22_1012_scaffold_2kb_scaffold_226_60	(51474..52487)	-1	Lokiarchaeota	Lytic	K00558	DNMT1, dcm; DNA (cytosine-5)-methyltransferase 1 [EC:2.1.1.37]	337	PRINTS	PR00105	Cytosine-specific DNA methyltransferase signature	5	21	3.90E-08	TRUE	IPR001525	C-5 cytosine methyltransferase	NFL97243.1	35.5	377	170	14	5	326	4	362	4.70E-41	179.1	338	365	N/A	N/A		NFL97243.1 DNA cytosine methyltransferase [Clostridium botulinum]
`Fenrir Meg22_1012`	Meg22_1012_scaffold_2kb_scaffold_226_60	(51474..52487)	-1	Lokiarchaeota	Lytic	K00558	DNMT1, dcm; DNA (cytosine-5)-methyltransferase 1 [EC:2.1.1.37]	337	PRINTS	PR00105	Cytosine-specific DNA methyltransferase signature	5	21	3.90E-08	TRUE	IPR001525	C-5 cytosine methyltransferase	PIQ68470.1	35.8	352	185	10	2	324	3	342	1.20E-41	181	338	350	Candidatus Taylorbacteria	Candidatus Taylorbacteria bacterium CG11_big_fil_rev_8_21_14_0_20_46_11	1975025	PIQ68470.1 DNA (cytosine-5-)-methyltransferase [Candidatus Taylorbacteria bacterium CG11_big_fil_rev_8_21_14_0_20_46_11]
`Fenrir Meg22_1012`	Meg22_1012_scaffold_2kb_scaffold_226_60	(51474..52487)	-1	Lokiarchaeota	Lytic	K00558	DNMT1, dcm; DNA (cytosine-5)-methyltransferase 1 [EC:2.1.1.37]	337	PRINTS	PR00105	Cytosine-specific DNA methyltransferase signature	5	21	3.90E-08	TRUE	IPR001525	C-5 cytosine methyltransferase	WP_091266680.1	35.7	353	186	11	1	324	1	341	9.50E-42	181.4	338	345	Bacteroidetes	Gillisia sp. Hel1_33_143	1336796	WP_091266680.1 DNA cytosine methyltransferase [Gillisia sp. Hel1_33_143]
`Fenrir Meg22_1012`	Meg22_1012_scaffold_2kb_scaffold_226_60	(51474..52487)	-1	Lokiarchaeota	Lytic	K00558	DNMT1, dcm; DNA (cytosine-5)-methyltransferase 1 [EC:2.1.1.37]	337	PRINTS	PR00105	Cytosine-specific DNA methyltransferase signature	5	21	3.90E-08	TRUE	IPR001525	C-5 cytosine methyltransferase	QBN22559.1	33	437	174	13	5	329	4	433	1.50E-42	184.1	338	434	0	uncultured archaeon	115547	QBN22559.1 DNA-cytosine methyltransferase [uncultured archaeon]
`Fenrir Meg22_1012`	Meg22_1012_scaffold_2kb_scaffold_226_60	(51474..52487)	-1	Lokiarchaeota	Lytic	K00558	DNMT1, dcm; DNA (cytosine-5)-methyltransferase 1 [EC:2.1.1.37]	337	PRINTS	PR00105	Cytosine-specific DNA methyltransferase signature	5	21	3.90E-08	TRUE	IPR001525	C-5 cytosine methyltransferase	RLD10440.1	42.3	378	151	11	5	326	20	386	1.00E-67	267.7	338	388	Chlamydiae	Chlamydiae bacterium	2081524	RLD10440.1 hypothetical protein DRI44_06095 [Chlamydiae bacterium]
`Fenrir Meg22_1012`	Meg22_1012_scaffold_2kb_scaffold_226_60	(51474..52487)	-1	Lokiarchaeota	Lytic	K00558	DNMT1, dcm; DNA (cytosine-5)-methyltransferase 1 [EC:2.1.1.37]	337	Pfam	PF00145	C-5 cytosine-specific DNA methylase	5	324	1.40E-55	TRUE	IPR001525	C-5 cytosine methyltransferase	KZE95855.1	34.4	352	189	10	5	324	3	344	3.10E-40	176.4	338	349	Firmicutes	Geobacillus stearothermophilus	1422	KZE95855.1 Modification methylase BspRI [Geobacillus stearothermophilus]
`Fenrir Meg22_1012`	Meg22_1012_scaffold_2kb_scaffold_226_60	(51474..52487)	-1	Lokiarchaeota	Lytic	K00558	DNMT1, dcm; DNA (cytosine-5)-methyltransferase 1 [EC:2.1.1.37]	337	Pfam	PF00145	C-5 cytosine-specific DNA methylase	5	324	1.40E-55	TRUE	IPR001525	C-5 cytosine methyltransferase	WP_094484886.1	35.7	347	183	9	6	324	7	341	1.80E-40	177.2	338	345	Bacteroidetes	Flavobacterium aurantiibacter	2023067	WP_094484886.1 DNA cytosine methyltransferase [Flavobacterium aurantiibacter]
`Fenrir Meg22_1012`	Meg22_1012_scaffold_2kb_scaffold_226_60	(51474..52487)	-1	Lokiarchaeota	Lytic	K00558	DNMT1, dcm; DNA (cytosine-5)-methyltransferase 1 [EC:2.1.1.37]	337	Pfam	PF00145	C-5 cytosine-specific DNA methylase	5	324	1.40E-55	TRUE	IPR001525	C-5 cytosine methyltransferase	WP_190403066.1	33.3	351	194	10	4	326	5	343	6.20E-41	178.7	338	345	N/A	N/A		WP_190403066.1 DNA (cytosine-5-)-methyltransferase [Pseudanabaena sp. FACHB-723]
`Fenrir Meg22_1012`	Meg22_1012_scaffold_2kb_scaffold_226_60	(51474..52487)	-1	Lokiarchaeota	Lytic	K00558	DNMT1, dcm; DNA (cytosine-5)-methyltransferase 1 [EC:2.1.1.37]	337	Pfam	PF00145	C-5 cytosine-specific DNA methylase	5	324	1.40E-55	TRUE	IPR001525	C-5 cytosine methyltransferase	RPH31553.1	33.5	343	192	8	6	321	8	341	6.20E-41	178.7	338	350	Bacteroidetes	Bacteroidales bacterium	2030927	RPH31553.1 DNA cytosine methyltransferase [Bacteroidales bacterium]
`Fenrir Meg22_1012`	Meg22_1012_scaffold_2kb_scaffold_226_60	(51474..52487)	-1	Lokiarchaeota	Lytic	K00558	DNMT1, dcm; DNA (cytosine-5)-methyltransferase 1 [EC:2.1.1.37]	337	Pfam	PF00145	C-5 cytosine-specific DNA methylase	5	324	1.40E-55	TRUE	IPR001525	C-5 cytosine methyltransferase	OGL72042.1	35	351	189	12	2	324	5	344	6.20E-41	178.7	338	353	Candidatus Uhrbacteria	Candidatus Uhrbacteria bacterium RIFCSPHIGHO2_02_FULL_53_13	1802389	OGL72042.1 DNA (cytosine-5-)-methyltransferase [Candidatus Uhrbacteria bacterium RIFCSPHIGHO2_02_FULL_53_13]
`Fenrir Meg22_1012`	Meg22_1012_scaffold_2kb_scaffold_226_60	(51474..52487)	-1	Lokiarchaeota	Lytic	K00558	DNMT1, dcm; DNA (cytosine-5)-methyltransferase 1 [EC:2.1.1.37]	337	Pfam	PF00145	C-5 cytosine-specific DNA methylase	5	324	1.40E-55	TRUE	IPR001525	C-5 cytosine methyltransferase	NFL97243.1	35.5	377	170	14	5	326	4	362	4.70E-41	179.1	338	365	N/A	N/A		NFL97243.1 DNA cytosine methyltransferase [Clostridium botulinum]
`Fenrir Meg22_1012`	Meg22_1012_scaffold_2kb_scaffold_226_60	(51474..52487)	-1	Lokiarchaeota	Lytic	K00558	DNMT1, dcm; DNA (cytosine-5)-methyltransferase 1 [EC:2.1.1.37]	337	Pfam	PF00145	C-5 cytosine-specific DNA methylase	5	324	1.40E-55	TRUE	IPR001525	C-5 cytosine methyltransferase	PIQ68470.1	35.8	352	185	10	2	324	3	342	1.20E-41	181	338	350	Candidatus Taylorbacteria	Candidatus Taylorbacteria bacterium CG11_big_fil_rev_8_21_14_0_20_46_11	1975025	PIQ68470.1 DNA (cytosine-5-)-methyltransferase [Candidatus Taylorbacteria bacterium CG11_big_fil_rev_8_21_14_0_20_46_11]
`Fenrir Meg22_1012`	Meg22_1012_scaffold_2kb_scaffold_226_60	(51474..52487)	-1	Lokiarchaeota	Lytic	K00558	DNMT1, dcm; DNA (cytosine-5)-methyltransferase 1 [EC:2.1.1.37]	337	Pfam	PF00145	C-5 cytosine-specific DNA methylase	5	324	1.40E-55	TRUE	IPR001525	C-5 cytosine methyltransferase	WP_091266680.1	35.7	353	186	11	1	324	1	341	9.50E-42	181.4	338	345	Bacteroidetes	Gillisia sp. Hel1_33_143	1336796	WP_091266680.1 DNA cytosine methyltransferase [Gillisia sp. Hel1_33_143]
`Fenrir Meg22_1012`	Meg22_1012_scaffold_2kb_scaffold_226_60	(51474..52487)	-1	Lokiarchaeota	Lytic	K00558	DNMT1, dcm; DNA (cytosine-5)-methyltransferase 1 [EC:2.1.1.37]	337	Pfam	PF00145	C-5 cytosine-specific DNA methylase	5	324	1.40E-55	TRUE	IPR001525	C-5 cytosine methyltransferase	QBN22559.1	33	437	174	13	5	329	4	433	1.50E-42	184.1	338	434	0	uncultured archaeon	115547	QBN22559.1 DNA-cytosine methyltransferase [uncultured archaeon]
`Fenrir Meg22_1012`	Meg22_1012_scaffold_2kb_scaffold_226_60	(51474..52487)	-1	Lokiarchaeota	Lytic	K00558	DNMT1, dcm; DNA (cytosine-5)-methyltransferase 1 [EC:2.1.1.37]	337	Pfam	PF00145	C-5 cytosine-specific DNA methylase	5	324	1.40E-55	TRUE	IPR001525	C-5 cytosine methyltransferase	RLD10440.1	42.3	378	151	11	5	326	20	386	1.00E-67	267.7	338	388	Chlamydiae	Chlamydiae bacterium	2081524	RLD10440.1 hypothetical protein DRI44_06095 [Chlamydiae bacterium]
`Fenrir Meg22_1012`	Meg22_1012_scaffold_2kb_scaffold_226_60	(51474..52487)	-1	Lokiarchaeota	Lytic	K00558	DNMT1, dcm; DNA (cytosine-5)-methyltransferase 1 [EC:2.1.1.37]	337	SUPERFAMILY	SSF53335	S-adenosyl-L-methionine-dependent methyltransferase	5	326	6.92E-70	TRUE	IPR029063	S-adenosyl-L-methionine-dependent methyltransferase	KZE95855.1	34.4	352	189	10	5	324	3	344	3.10E-40	176.4	338	349	Firmicutes	Geobacillus stearothermophilus	1422	KZE95855.1 Modification methylase BspRI [Geobacillus stearothermophilus]
`Fenrir Meg22_1012`	Meg22_1012_scaffold_2kb_scaffold_226_60	(51474..52487)	-1	Lokiarchaeota	Lytic	K00558	DNMT1, dcm; DNA (cytosine-5)-methyltransferase 1 [EC:2.1.1.37]	337	SUPERFAMILY	SSF53335	S-adenosyl-L-methionine-dependent methyltransferase	5	326	6.92E-70	TRUE	IPR029063	S-adenosyl-L-methionine-dependent methyltransferase	WP_094484886.1	35.7	347	183	9	6	324	7	341	1.80E-40	177.2	338	345	Bacteroidetes	Flavobacterium aurantiibacter	2023067	WP_094484886.1 DNA cytosine methyltransferase [Flavobacterium aurantiibacter]
`Fenrir Meg22_1012`	Meg22_1012_scaffold_2kb_scaffold_226_60	(51474..52487)	-1	Lokiarchaeota	Lytic	K00558	DNMT1, dcm; DNA (cytosine-5)-methyltransferase 1 [EC:2.1.1.37]	337	SUPERFAMILY	SSF53335	S-adenosyl-L-methionine-dependent methyltransferase	5	326	6.92E-70	TRUE	IPR029063	S-adenosyl-L-methionine-dependent methyltransferase	WP_190403066.1	33.3	351	194	10	4	326	5	343	6.20E-41	178.7	338	345	N/A	N/A		WP_190403066.1 DNA (cytosine-5-)-methyltransferase [Pseudanabaena sp. FACHB-723]
`Fenrir Meg22_1012`	Meg22_1012_scaffold_2kb_scaffold_226_60	(51474..52487)	-1	Lokiarchaeota	Lytic	K00558	DNMT1, dcm; DNA (cytosine-5)-methyltransferase 1 [EC:2.1.1.37]	337	SUPERFAMILY	SSF53335	S-adenosyl-L-methionine-dependent methyltransferase	5	326	6.92E-70	TRUE	IPR029063	S-adenosyl-L-methionine-dependent methyltransferase	RPH31553.1	33.5	343	192	8	6	321	8	341	6.20E-41	178.7	338	350	Bacteroidetes	Bacteroidales bacterium	2030927	RPH31553.1 DNA cytosine methyltransferase [Bacteroidales bacterium]
`Fenrir Meg22_1012`	Meg22_1012_scaffold_2kb_scaffold_226_60	(51474..52487)	-1	Lokiarchaeota	Lytic	K00558	DNMT1, dcm; DNA (cytosine-5)-methyltransferase 1 [EC:2.1.1.37]	337	SUPERFAMILY	SSF53335	S-adenosyl-L-methionine-dependent methyltransferase	5	326	6.92E-70	TRUE	IPR029063	S-adenosyl-L-methionine-dependent methyltransferase	OGL72042.1	35	351	189	12	2	324	5	344	6.20E-41	178.7	338	353	Candidatus Uhrbacteria	Candidatus Uhrbacteria bacterium RIFCSPHIGHO2_02_FULL_53_13	1802389	OGL72042.1 DNA (cytosine-5-)-methyltransferase [Candidatus Uhrbacteria bacterium RIFCSPHIGHO2_02_FULL_53_13]
`Fenrir Meg22_1012`	Meg22_1012_scaffold_2kb_scaffold_226_60	(51474..52487)	-1	Lokiarchaeota	Lytic	K00558	DNMT1, dcm; DNA (cytosine-5)-methyltransferase 1 [EC:2.1.1.37]	337	SUPERFAMILY	SSF53335	S-adenosyl-L-methionine-dependent methyltransferase	5	326	6.92E-70	TRUE	IPR029063	S-adenosyl-L-methionine-dependent methyltransferase	NFL97243.1	35.5	377	170	14	5	326	4	362	4.70E-41	179.1	338	365	N/A	N/A		NFL97243.1 DNA cytosine methyltransferase [Clostridium botulinum]
`Fenrir Meg22_1012`	Meg22_1012_scaffold_2kb_scaffold_226_60	(51474..52487)	-1	Lokiarchaeota	Lytic	K00558	DNMT1, dcm; DNA (cytosine-5)-methyltransferase 1 [EC:2.1.1.37]	337	SUPERFAMILY	SSF53335	S-adenosyl-L-methionine-dependent methyltransferase	5	326	6.92E-70	TRUE	IPR029063	S-adenosyl-L-methionine-dependent methyltransferase	PIQ68470.1	35.8	352	185	10	2	324	3	342	1.20E-41	181	338	350	Candidatus Taylorbacteria	Candidatus Taylorbacteria bacterium CG11_big_fil_rev_8_21_14_0_20_46_11	1975025	PIQ68470.1 DNA (cytosine-5-)-methyltransferase [Candidatus Taylorbacteria bacterium CG11_big_fil_rev_8_21_14_0_20_46_11]
`Fenrir Meg22_1012`	Meg22_1012_scaffold_2kb_scaffold_226_60	(51474..52487)	-1	Lokiarchaeota	Lytic	K00558	DNMT1, dcm; DNA (cytosine-5)-methyltransferase 1 [EC:2.1.1.37]	337	SUPERFAMILY	SSF53335	S-adenosyl-L-methionine-dependent methyltransferase	5	326	6.92E-70	TRUE	IPR029063	S-adenosyl-L-methionine-dependent methyltransferase	WP_091266680.1	35.7	353	186	11	1	324	1	341	9.50E-42	181.4	338	345	Bacteroidetes	Gillisia sp. Hel1_33_143	1336796	WP_091266680.1 DNA cytosine methyltransferase [Gillisia sp. Hel1_33_143]
`Fenrir Meg22_1012`	Meg22_1012_scaffold_2kb_scaffold_226_60	(51474..52487)	-1	Lokiarchaeota	Lytic	K00558	DNMT1, dcm; DNA (cytosine-5)-methyltransferase 1 [EC:2.1.1.37]	337	SUPERFAMILY	SSF53335	S-adenosyl-L-methionine-dependent methyltransferase	5	326	6.92E-70	TRUE	IPR029063	S-adenosyl-L-methionine-dependent methyltransferase	QBN22559.1	33	437	174	13	5	329	4	433	1.50E-42	184.1	338	434	0	uncultured archaeon	115547	QBN22559.1 DNA-cytosine methyltransferase [uncultured archaeon]
`Fenrir Meg22_1012`	Meg22_1012_scaffold_2kb_scaffold_226_60	(51474..52487)	-1	Lokiarchaeota	Lytic	K00558	DNMT1, dcm; DNA (cytosine-5)-methyltransferase 1 [EC:2.1.1.37]	337	SUPERFAMILY	SSF53335	S-adenosyl-L-methionine-dependent methyltransferase	5	326	6.92E-70	TRUE	IPR029063	S-adenosyl-L-methionine-dependent methyltransferase	RLD10440.1	42.3	378	151	11	5	326	20	386	1.00E-67	267.7	338	388	Chlamydiae	Chlamydiae bacterium	2081524	RLD10440.1 hypothetical protein DRI44_06095 [Chlamydiae bacterium]
`Fenrir Meg22_1012`	Meg22_1012_scaffold_2kb_scaffold_226_60	(51474..52487)	-1	Lokiarchaeota	Lytic	K00558	DNMT1, dcm; DNA (cytosine-5)-methyltransferase 1 [EC:2.1.1.37]	337	TIGRFAM	TIGR00675	dcm: DNA (cytosine-5-)-methyltransferase	6	323	6.00E-45	TRUE	IPR001525	C-5 cytosine methyltransferase	KZE95855.1	34.4	352	189	10	5	324	3	344	3.10E-40	176.4	338	349	Firmicutes	Geobacillus stearothermophilus	1422	KZE95855.1 Modification methylase BspRI [Geobacillus stearothermophilus]
`Fenrir Meg22_1012`	Meg22_1012_scaffold_2kb_scaffold_226_60	(51474..52487)	-1	Lokiarchaeota	Lytic	K00558	DNMT1, dcm; DNA (cytosine-5)-methyltransferase 1 [EC:2.1.1.37]	337	TIGRFAM	TIGR00675	dcm: DNA (cytosine-5-)-methyltransferase	6	323	6.00E-45	TRUE	IPR001525	C-5 cytosine methyltransferase	WP_094484886.1	35.7	347	183	9	6	324	7	341	1.80E-40	177.2	338	345	Bacteroidetes	Flavobacterium aurantiibacter	2023067	WP_094484886.1 DNA cytosine methyltransferase [Flavobacterium aurantiibacter]
`Fenrir Meg22_1012`	Meg22_1012_scaffold_2kb_scaffold_226_60	(51474..52487)	-1	Lokiarchaeota	Lytic	K00558	DNMT1, dcm; DNA (cytosine-5)-methyltransferase 1 [EC:2.1.1.37]	337	TIGRFAM	TIGR00675	dcm: DNA (cytosine-5-)-methyltransferase	6	323	6.00E-45	TRUE	IPR001525	C-5 cytosine methyltransferase	WP_190403066.1	33.3	351	194	10	4	326	5	343	6.20E-41	178.7	338	345	N/A	N/A		WP_190403066.1 DNA (cytosine-5-)-methyltransferase [Pseudanabaena sp. FACHB-723]
`Fenrir Meg22_1012`	Meg22_1012_scaffold_2kb_scaffold_226_60	(51474..52487)	-1	Lokiarchaeota	Lytic	K00558	DNMT1, dcm; DNA (cytosine-5)-methyltransferase 1 [EC:2.1.1.37]	337	TIGRFAM	TIGR00675	dcm: DNA (cytosine-5-)-methyltransferase	6	323	6.00E-45	TRUE	IPR001525	C-5 cytosine methyltransferase	RPH31553.1	33.5	343	192	8	6	321	8	341	6.20E-41	178.7	338	350	Bacteroidetes	Bacteroidales bacterium	2030927	RPH31553.1 DNA cytosine methyltransferase [Bacteroidales bacterium]
`Fenrir Meg22_1012`	Meg22_1012_scaffold_2kb_scaffold_226_60	(51474..52487)	-1	Lokiarchaeota	Lytic	K00558	DNMT1, dcm; DNA (cytosine-5)-methyltransferase 1 [EC:2.1.1.37]	337	TIGRFAM	TIGR00675	dcm: DNA (cytosine-5-)-methyltransferase	6	323	6.00E-45	TRUE	IPR001525	C-5 cytosine methyltransferase	OGL72042.1	35	351	189	12	2	324	5	344	6.20E-41	178.7	338	353	Candidatus Uhrbacteria	Candidatus Uhrbacteria bacterium RIFCSPHIGHO2_02_FULL_53_13	1802389	OGL72042.1 DNA (cytosine-5-)-methyltransferase [Candidatus Uhrbacteria bacterium RIFCSPHIGHO2_02_FULL_53_13]
`Fenrir Meg22_1012`	Meg22_1012_scaffold_2kb_scaffold_226_60	(51474..52487)	-1	Lokiarchaeota	Lytic	K00558	DNMT1, dcm; DNA (cytosine-5)-methyltransferase 1 [EC:2.1.1.37]	337	TIGRFAM	TIGR00675	dcm: DNA (cytosine-5-)-methyltransferase	6	323	6.00E-45	TRUE	IPR001525	C-5 cytosine methyltransferase	NFL97243.1	35.5	377	170	14	5	326	4	362	4.70E-41	179.1	338	365	N/A	N/A		NFL97243.1 DNA cytosine methyltransferase [Clostridium botulinum]
`Fenrir Meg22_1012`	Meg22_1012_scaffold_2kb_scaffold_226_60	(51474..52487)	-1	Lokiarchaeota	Lytic	K00558	DNMT1, dcm; DNA (cytosine-5)-methyltransferase 1 [EC:2.1.1.37]	337	TIGRFAM	TIGR00675	dcm: DNA (cytosine-5-)-methyltransferase	6	323	6.00E-45	TRUE	IPR001525	C-5 cytosine methyltransferase	PIQ68470.1	35.8	352	185	10	2	324	3	342	1.20E-41	181	338	350	Candidatus Taylorbacteria	Candidatus Taylorbacteria bacterium CG11_big_fil_rev_8_21_14_0_20_46_11	1975025	PIQ68470.1 DNA (cytosine-5-)-methyltransferase [Candidatus Taylorbacteria bacterium CG11_big_fil_rev_8_21_14_0_20_46_11]
`Fenrir Meg22_1012`	Meg22_1012_scaffold_2kb_scaffold_226_60	(51474..52487)	-1	Lokiarchaeota	Lytic	K00558	DNMT1, dcm; DNA (cytosine-5)-methyltransferase 1 [EC:2.1.1.37]	337	TIGRFAM	TIGR00675	dcm: DNA (cytosine-5-)-methyltransferase	6	323	6.00E-45	TRUE	IPR001525	C-5 cytosine methyltransferase	WP_091266680.1	35.7	353	186	11	1	324	1	341	9.50E-42	181.4	338	345	Bacteroidetes	Gillisia sp. Hel1_33_143	1336796	WP_091266680.1 DNA cytosine methyltransferase [Gillisia sp. Hel1_33_143]
`Fenrir Meg22_1012`	Meg22_1012_scaffold_2kb_scaffold_226_60	(51474..52487)	-1	Lokiarchaeota	Lytic	K00558	DNMT1, dcm; DNA (cytosine-5)-methyltransferase 1 [EC:2.1.1.37]	337	TIGRFAM	TIGR00675	dcm: DNA (cytosine-5-)-methyltransferase	6	323	6.00E-45	TRUE	IPR001525	C-5 cytosine methyltransferase	QBN22559.1	33	437	174	13	5	329	4	433	1.50E-42	184.1	338	434	0	uncultured archaeon	115547	QBN22559.1 DNA-cytosine methyltransferase [uncultured archaeon]
`Fenrir Meg22_1012`	Meg22_1012_scaffold_2kb_scaffold_226_60	(51474..52487)	-1	Lokiarchaeota	Lytic	K00558	DNMT1, dcm; DNA (cytosine-5)-methyltransferase 1 [EC:2.1.1.37]	337	TIGRFAM	TIGR00675	dcm: DNA (cytosine-5-)-methyltransferase	6	323	6.00E-45	TRUE	IPR001525	C-5 cytosine methyltransferase	RLD10440.1	42.3	378	151	11	5	326	20	386	1.00E-67	267.7	338	388	Chlamydiae	Chlamydiae bacterium	2081524	RLD10440.1 hypothetical protein DRI44_06095 [Chlamydiae bacterium]
`Fenrir Meg22_1012`	Meg22_1012_scaffold_2kb_scaffold_226_60	(51474..52487)	-1	Lokiarchaeota	Lytic	K00558	DNMT1, dcm; DNA (cytosine-5)-methyltransferase 1 [EC:2.1.1.37]	337	Gene3D	G3DSA:3.40.50.150	Vaccinia Virus protein VP39	7	322	1.50E-66	TRUE			KZE95855.1	34.4	352	189	10	5	324	3	344	3.10E-40	176.4	338	349	Firmicutes	Geobacillus stearothermophilus	1422	KZE95855.1 Modification methylase BspRI [Geobacillus stearothermophilus]
`Fenrir Meg22_1012`	Meg22_1012_scaffold_2kb_scaffold_226_60	(51474..52487)	-1	Lokiarchaeota	Lytic	K00558	DNMT1, dcm; DNA (cytosine-5)-methyltransferase 1 [EC:2.1.1.37]	337	Gene3D	G3DSA:3.40.50.150	Vaccinia Virus protein VP39	7	322	1.50E-66	TRUE			WP_094484886.1	35.7	347	183	9	6	324	7	341	1.80E-40	177.2	338	345	Bacteroidetes	Flavobacterium aurantiibacter	2023067	WP_094484886.1 DNA cytosine methyltransferase [Flavobacterium aurantiibacter]
`Fenrir Meg22_1012`	Meg22_1012_scaffold_2kb_scaffold_226_60	(51474..52487)	-1	Lokiarchaeota	Lytic	K00558	DNMT1, dcm; DNA (cytosine-5)-methyltransferase 1 [EC:2.1.1.37]	337	Gene3D	G3DSA:3.40.50.150	Vaccinia Virus protein VP39	7	322	1.50E-66	TRUE			WP_190403066.1	33.3	351	194	10	4	326	5	343	6.20E-41	178.7	338	345	N/A	N/A		WP_190403066.1 DNA (cytosine-5-)-methyltransferase [Pseudanabaena sp. FACHB-723]
`Fenrir Meg22_1012`	Meg22_1012_scaffold_2kb_scaffold_226_60	(51474..52487)	-1	Lokiarchaeota	Lytic	K00558	DNMT1, dcm; DNA (cytosine-5)-methyltransferase 1 [EC:2.1.1.37]	337	Gene3D	G3DSA:3.40.50.150	Vaccinia Virus protein VP39	7	322	1.50E-66	TRUE			RPH31553.1	33.5	343	192	8	6	321	8	341	6.20E-41	178.7	338	350	Bacteroidetes	Bacteroidales bacterium	2030927	RPH31553.1 DNA cytosine methyltransferase [Bacteroidales bacterium]
`Fenrir Meg22_1012`	Meg22_1012_scaffold_2kb_scaffold_226_60	(51474..52487)	-1	Lokiarchaeota	Lytic	K00558	DNMT1, dcm; DNA (cytosine-5)-methyltransferase 1 [EC:2.1.1.37]	337	Gene3D	G3DSA:3.40.50.150	Vaccinia Virus protein VP39	7	322	1.50E-66	TRUE			OGL72042.1	35	351	189	12	2	324	5	344	6.20E-41	178.7	338	353	Candidatus Uhrbacteria	Candidatus Uhrbacteria bacterium RIFCSPHIGHO2_02_FULL_53_13	1802389	OGL72042.1 DNA (cytosine-5-)-methyltransferase [Candidatus Uhrbacteria bacterium RIFCSPHIGHO2_02_FULL_53_13]
`Fenrir Meg22_1012`	Meg22_1012_scaffold_2kb_scaffold_226_60	(51474..52487)	-1	Lokiarchaeota	Lytic	K00558	DNMT1, dcm; DNA (cytosine-5)-methyltransferase 1 [EC:2.1.1.37]	337	Gene3D	G3DSA:3.40.50.150	Vaccinia Virus protein VP39	7	322	1.50E-66	TRUE			NFL97243.1	35.5	377	170	14	5	326	4	362	4.70E-41	179.1	338	365	N/A	N/A		NFL97243.1 DNA cytosine methyltransferase [Clostridium botulinum]
`Fenrir Meg22_1012`	Meg22_1012_scaffold_2kb_scaffold_226_60	(51474..52487)	-1	Lokiarchaeota	Lytic	K00558	DNMT1, dcm; DNA (cytosine-5)-methyltransferase 1 [EC:2.1.1.37]	337	Gene3D	G3DSA:3.40.50.150	Vaccinia Virus protein VP39	7	322	1.50E-66	TRUE			PIQ68470.1	35.8	352	185	10	2	324	3	342	1.20E-41	181	338	350	Candidatus Taylorbacteria	Candidatus Taylorbacteria bacterium CG11_big_fil_rev_8_21_14_0_20_46_11	1975025	PIQ68470.1 DNA (cytosine-5-)-methyltransferase [Candidatus Taylorbacteria bacterium CG11_big_fil_rev_8_21_14_0_20_46_11]
`Fenrir Meg22_1012`	Meg22_1012_scaffold_2kb_scaffold_226_60	(51474..52487)	-1	Lokiarchaeota	Lytic	K00558	DNMT1, dcm; DNA (cytosine-5)-methyltransferase 1 [EC:2.1.1.37]	337	Gene3D	G3DSA:3.40.50.150	Vaccinia Virus protein VP39	7	322	1.50E-66	TRUE			WP_091266680.1	35.7	353	186	11	1	324	1	341	9.50E-42	181.4	338	345	Bacteroidetes	Gillisia sp. Hel1_33_143	1336796	WP_091266680.1 DNA cytosine methyltransferase [Gillisia sp. Hel1_33_143]
`Fenrir Meg22_1012`	Meg22_1012_scaffold_2kb_scaffold_226_60	(51474..52487)	-1	Lokiarchaeota	Lytic	K00558	DNMT1, dcm; DNA (cytosine-5)-methyltransferase 1 [EC:2.1.1.37]	337	Gene3D	G3DSA:3.40.50.150	Vaccinia Virus protein VP39	7	322	1.50E-66	TRUE			QBN22559.1	33	437	174	13	5	329	4	433	1.50E-42	184.1	338	434	0	uncultured archaeon	115547	QBN22559.1 DNA-cytosine methyltransferase [uncultured archaeon]
`Fenrir Meg22_1012`	Meg22_1012_scaffold_2kb_scaffold_226_60	(51474..52487)	-1	Lokiarchaeota	Lytic	K00558	DNMT1, dcm; DNA (cytosine-5)-methyltransferase 1 [EC:2.1.1.37]	337	Gene3D	G3DSA:3.40.50.150	Vaccinia Virus protein VP39	7	322	1.50E-66	TRUE			RLD10440.1	42.3	378	151	11	5	326	20	386	1.00E-67	267.7	338	388	Chlamydiae	Chlamydiae bacterium	2081524	RLD10440.1 hypothetical protein DRI44_06095 [Chlamydiae bacterium]
`Fenrir Meg22_1012`	Meg22_1012_scaffold_2kb_scaffold_226_60	(51474..52487)	-1	Lokiarchaeota	Lytic	K00558	DNMT1, dcm; DNA (cytosine-5)-methyltransferase 1 [EC:2.1.1.37]	337	PRINTS	PR00105	Cytosine-specific DNA methyltransferase signature	105	119	3.90E-08	TRUE	IPR001525	C-5 cytosine methyltransferase	KZE95855.1	34.4	352	189	10	5	324	3	344	3.10E-40	176.4	338	349	Firmicutes	Geobacillus stearothermophilus	1422	KZE95855.1 Modification methylase BspRI [Geobacillus stearothermophilus]
`Fenrir Meg22_1012`	Meg22_1012_scaffold_2kb_scaffold_226_60	(51474..52487)	-1	Lokiarchaeota	Lytic	K00558	DNMT1, dcm; DNA (cytosine-5)-methyltransferase 1 [EC:2.1.1.37]	337	PRINTS	PR00105	Cytosine-specific DNA methyltransferase signature	105	119	3.90E-08	TRUE	IPR001525	C-5 cytosine methyltransferase	WP_094484886.1	35.7	347	183	9	6	324	7	341	1.80E-40	177.2	338	345	Bacteroidetes	Flavobacterium aurantiibacter	2023067	WP_094484886.1 DNA cytosine methyltransferase [Flavobacterium aurantiibacter]
`Fenrir Meg22_1012`	Meg22_1012_scaffold_2kb_scaffold_226_60	(51474..52487)	-1	Lokiarchaeota	Lytic	K00558	DNMT1, dcm; DNA (cytosine-5)-methyltransferase 1 [EC:2.1.1.37]	337	PRINTS	PR00105	Cytosine-specific DNA methyltransferase signature	105	119	3.90E-08	TRUE	IPR001525	C-5 cytosine methyltransferase	WP_190403066.1	33.3	351	194	10	4	326	5	343	6.20E-41	178.7	338	345	N/A	N/A		WP_190403066.1 DNA (cytosine-5-)-methyltransferase [Pseudanabaena sp. FACHB-723]
`Fenrir Meg22_1012`	Meg22_1012_scaffold_2kb_scaffold_226_60	(51474..52487)	-1	Lokiarchaeota	Lytic	K00558	DNMT1, dcm; DNA (cytosine-5)-methyltransferase 1 [EC:2.1.1.37]	337	PRINTS	PR00105	Cytosine-specific DNA methyltransferase signature	105	119	3.90E-08	TRUE	IPR001525	C-5 cytosine methyltransferase	RPH31553.1	33.5	343	192	8	6	321	8	341	6.20E-41	178.7	338	350	Bacteroidetes	Bacteroidales bacterium	2030927	RPH31553.1 DNA cytosine methyltransferase [Bacteroidales bacterium]
`Fenrir Meg22_1012`	Meg22_1012_scaffold_2kb_scaffold_226_60	(51474..52487)	-1	Lokiarchaeota	Lytic	K00558	DNMT1, dcm; DNA (cytosine-5)-methyltransferase 1 [EC:2.1.1.37]	337	PRINTS	PR00105	Cytosine-specific DNA methyltransferase signature	105	119	3.90E-08	TRUE	IPR001525	C-5 cytosine methyltransferase	OGL72042.1	35	351	189	12	2	324	5	344	6.20E-41	178.7	338	353	Candidatus Uhrbacteria	Candidatus Uhrbacteria bacterium RIFCSPHIGHO2_02_FULL_53_13	1802389	OGL72042.1 DNA (cytosine-5-)-methyltransferase [Candidatus Uhrbacteria bacterium RIFCSPHIGHO2_02_FULL_53_13]
`Fenrir Meg22_1012`	Meg22_1012_scaffold_2kb_scaffold_226_60	(51474..52487)	-1	Lokiarchaeota	Lytic	K00558	DNMT1, dcm; DNA (cytosine-5)-methyltransferase 1 [EC:2.1.1.37]	337	PRINTS	PR00105	Cytosine-specific DNA methyltransferase signature	105	119	3.90E-08	TRUE	IPR001525	C-5 cytosine methyltransferase	NFL97243.1	35.5	377	170	14	5	326	4	362	4.70E-41	179.1	338	365	N/A	N/A		NFL97243.1 DNA cytosine methyltransferase [Clostridium botulinum]
`Fenrir Meg22_1012`	Meg22_1012_scaffold_2kb_scaffold_226_60	(51474..52487)	-1	Lokiarchaeota	Lytic	K00558	DNMT1, dcm; DNA (cytosine-5)-methyltransferase 1 [EC:2.1.1.37]	337	PRINTS	PR00105	Cytosine-specific DNA methyltransferase signature	105	119	3.90E-08	TRUE	IPR001525	C-5 cytosine methyltransferase	PIQ68470.1	35.8	352	185	10	2	324	3	342	1.20E-41	181	338	350	Candidatus Taylorbacteria	Candidatus Taylorbacteria bacterium CG11_big_fil_rev_8_21_14_0_20_46_11	1975025	PIQ68470.1 DNA (cytosine-5-)-methyltransferase [Candidatus Taylorbacteria bacterium CG11_big_fil_rev_8_21_14_0_20_46_11]
`Fenrir Meg22_1012`	Meg22_1012_scaffold_2kb_scaffold_226_60	(51474..52487)	-1	Lokiarchaeota	Lytic	K00558	DNMT1, dcm; DNA (cytosine-5)-methyltransferase 1 [EC:2.1.1.37]	337	PRINTS	PR00105	Cytosine-specific DNA methyltransferase signature	105	119	3.90E-08	TRUE	IPR001525	C-5 cytosine methyltransferase	WP_091266680.1	35.7	353	186	11	1	324	1	341	9.50E-42	181.4	338	345	Bacteroidetes	Gillisia sp. Hel1_33_143	1336796	WP_091266680.1 DNA cytosine methyltransferase [Gillisia sp. Hel1_33_143]
`Fenrir Meg22_1012`	Meg22_1012_scaffold_2kb_scaffold_226_60	(51474..52487)	-1	Lokiarchaeota	Lytic	K00558	DNMT1, dcm; DNA (cytosine-5)-methyltransferase 1 [EC:2.1.1.37]	337	PRINTS	PR00105	Cytosine-specific DNA methyltransferase signature	105	119	3.90E-08	TRUE	IPR001525	C-5 cytosine methyltransferase	QBN22559.1	33	437	174	13	5	329	4	433	1.50E-42	184.1	338	434	0	uncultured archaeon	115547	QBN22559.1 DNA-cytosine methyltransferase [uncultured archaeon]
`Fenrir Meg22_1012`	Meg22_1012_scaffold_2kb_scaffold_226_60	(51474..52487)	-1	Lokiarchaeota	Lytic	K00558	DNMT1, dcm; DNA (cytosine-5)-methyltransferase 1 [EC:2.1.1.37]	337	PRINTS	PR00105	Cytosine-specific DNA methyltransferase signature	105	119	3.90E-08	TRUE	IPR001525	C-5 cytosine methyltransferase	RLD10440.1	42.3	378	151	11	5	326	20	386	1.00E-67	267.7	338	388	Chlamydiae	Chlamydiae bacterium	2081524	RLD10440.1 hypothetical protein DRI44_06095 [Chlamydiae bacterium]
`Fenrir Meg22_1012`	Meg22_1012_scaffold_2kb_scaffold_226_60	(51474..52487)	-1	Lokiarchaeota	Lytic	K00558	DNMT1, dcm; DNA (cytosine-5)-methyltransferase 1 [EC:2.1.1.37]	337	Gene3D	G3DSA:3.90.120.10	DNA Methylase	133	315	1.50E-66	TRUE			KZE95855.1	34.4	352	189	10	5	324	3	344	3.10E-40	176.4	338	349	Firmicutes	Geobacillus stearothermophilus	1422	KZE95855.1 Modification methylase BspRI [Geobacillus stearothermophilus]
`Fenrir Meg22_1012`	Meg22_1012_scaffold_2kb_scaffold_226_60	(51474..52487)	-1	Lokiarchaeota	Lytic	K00558	DNMT1, dcm; DNA (cytosine-5)-methyltransferase 1 [EC:2.1.1.37]	337	Gene3D	G3DSA:3.90.120.10	DNA Methylase	133	315	1.50E-66	TRUE			WP_094484886.1	35.7	347	183	9	6	324	7	341	1.80E-40	177.2	338	345	Bacteroidetes	Flavobacterium aurantiibacter	2023067	WP_094484886.1 DNA cytosine methyltransferase [Flavobacterium aurantiibacter]
`Fenrir Meg22_1012`	Meg22_1012_scaffold_2kb_scaffold_226_60	(51474..52487)	-1	Lokiarchaeota	Lytic	K00558	DNMT1, dcm; DNA (cytosine-5)-methyltransferase 1 [EC:2.1.1.37]	337	Gene3D	G3DSA:3.90.120.10	DNA Methylase	133	315	1.50E-66	TRUE			WP_190403066.1	33.3	351	194	10	4	326	5	343	6.20E-41	178.7	338	345	N/A	N/A		WP_190403066.1 DNA (cytosine-5-)-methyltransferase [Pseudanabaena sp. FACHB-723]
`Fenrir Meg22_1012`	Meg22_1012_scaffold_2kb_scaffold_226_60	(51474..52487)	-1	Lokiarchaeota	Lytic	K00558	DNMT1, dcm; DNA (cytosine-5)-methyltransferase 1 [EC:2.1.1.37]	337	Gene3D	G3DSA:3.90.120.10	DNA Methylase	133	315	1.50E-66	TRUE			RPH31553.1	33.5	343	192	8	6	321	8	341	6.20E-41	178.7	338	350	Bacteroidetes	Bacteroidales bacterium	2030927	RPH31553.1 DNA cytosine methyltransferase [Bacteroidales bacterium]
`Fenrir Meg22_1012`	Meg22_1012_scaffold_2kb_scaffold_226_60	(51474..52487)	-1	Lokiarchaeota	Lytic	K00558	DNMT1, dcm; DNA (cytosine-5)-methyltransferase 1 [EC:2.1.1.37]	337	Gene3D	G3DSA:3.90.120.10	DNA Methylase	133	315	1.50E-66	TRUE			OGL72042.1	35	351	189	12	2	324	5	344	6.20E-41	178.7	338	353	Candidatus Uhrbacteria	Candidatus Uhrbacteria bacterium RIFCSPHIGHO2_02_FULL_53_13	1802389	OGL72042.1 DNA (cytosine-5-)-methyltransferase [Candidatus Uhrbacteria bacterium RIFCSPHIGHO2_02_FULL_53_13]
`Fenrir Meg22_1012`	Meg22_1012_scaffold_2kb_scaffold_226_60	(51474..52487)	-1	Lokiarchaeota	Lytic	K00558	DNMT1, dcm; DNA (cytosine-5)-methyltransferase 1 [EC:2.1.1.37]	337	Gene3D	G3DSA:3.90.120.10	DNA Methylase	133	315	1.50E-66	TRUE			NFL97243.1	35.5	377	170	14	5	326	4	362	4.70E-41	179.1	338	365	N/A	N/A		NFL97243.1 DNA cytosine methyltransferase [Clostridium botulinum]
`Fenrir Meg22_1012`	Meg22_1012_scaffold_2kb_scaffold_226_60	(51474..52487)	-1	Lokiarchaeota	Lytic	K00558	DNMT1, dcm; DNA (cytosine-5)-methyltransferase 1 [EC:2.1.1.37]	337	Gene3D	G3DSA:3.90.120.10	DNA Methylase	133	315	1.50E-66	TRUE			PIQ68470.1	35.8	352	185	10	2	324	3	342	1.20E-41	181	338	350	Candidatus Taylorbacteria	Candidatus Taylorbacteria bacterium CG11_big_fil_rev_8_21_14_0_20_46_11	1975025	PIQ68470.1 DNA (cytosine-5-)-methyltransferase [Candidatus Taylorbacteria bacterium CG11_big_fil_rev_8_21_14_0_20_46_11]
`Fenrir Meg22_1012`	Meg22_1012_scaffold_2kb_scaffold_226_60	(51474..52487)	-1	Lokiarchaeota	Lytic	K00558	DNMT1, dcm; DNA (cytosine-5)-methyltransferase 1 [EC:2.1.1.37]	337	Gene3D	G3DSA:3.90.120.10	DNA Methylase	133	315	1.50E-66	TRUE			WP_091266680.1	35.7	353	186	11	1	324	1	341	9.50E-42	181.4	338	345	Bacteroidetes	Gillisia sp. Hel1_33_143	1336796	WP_091266680.1 DNA cytosine methyltransferase [Gillisia sp. Hel1_33_143]
`Fenrir Meg22_1012`	Meg22_1012_scaffold_2kb_scaffold_226_60	(51474..52487)	-1	Lokiarchaeota	Lytic	K00558	DNMT1, dcm; DNA (cytosine-5)-methyltransferase 1 [EC:2.1.1.37]	337	Gene3D	G3DSA:3.90.120.10	DNA Methylase	133	315	1.50E-66	TRUE			QBN22559.1	33	437	174	13	5	329	4	433	1.50E-42	184.1	338	434	0	uncultured archaeon	115547	QBN22559.1 DNA-cytosine methyltransferase [uncultured archaeon]
`Fenrir Meg22_1012`	Meg22_1012_scaffold_2kb_scaffold_226_60	(51474..52487)	-1	Lokiarchaeota	Lytic	K00558	DNMT1, dcm; DNA (cytosine-5)-methyltransferase 1 [EC:2.1.1.37]	337	Gene3D	G3DSA:3.90.120.10	DNA Methylase	133	315	1.50E-66	TRUE			RLD10440.1	42.3	378	151	11	5	326	20	386	1.00E-67	267.7	338	388	Chlamydiae	Chlamydiae bacterium	2081524	RLD10440.1 hypothetical protein DRI44_06095 [Chlamydiae bacterium]
`Fenrir Meg22_1012`	Meg22_1012_scaffold_2kb_scaffold_226_61	(52477..52665)	-1	Lokiarchaeota	Lytic	None	hypothetical protein	NA	NA	NA	NA	NA	NA	NA	NA	NA	NA	NA	NA	NA	NA	NA	NA	NA	NA	NA	NA	NA	NA	NA	NA	NA	NA	NA
`Fenrir Meg22_1012`	Meg22_1012_scaffold_2kb_scaffold_226_62	(52671..53426)	-1	Lokiarchaeota	Lytic	K00571	E2.1.1.72; site-specific DNA-methyltransferase (adenine-specific) [EC:2.1.1.72]	251	Gene3D	G3DSA:3.40.50.150	Vaccinia Virus protein VP39	1	250	1.40E-53	TRUE			KAB2904251.1	34.7	245	143	4	8	236	10	253	1.50E-31	147.1	252	385	Chloroflexi	Anaerolineae bacterium	2052143	KAB2904251.1 site-specific DNA-methyltransferase [Anaerolineae bacterium]
`Fenrir Meg22_1012`	Meg22_1012_scaffold_2kb_scaffold_226_62	(52671..53426)	-1	Lokiarchaeota	Lytic	K00571	E2.1.1.72; site-specific DNA-methyltransferase (adenine-specific) [EC:2.1.1.72]	251	Gene3D	G3DSA:3.40.50.150	Vaccinia Virus protein VP39	1	250	1.40E-53	TRUE			HGB30860.1	35.5	242	145	5	1	236	2	238	6.70E-32	148.3	252	261	N/A	N/A		HGB30860.1 site-specific DNA-methyltransferase [Dictyoglomus turgidum]
`Fenrir Meg22_1012`	Meg22_1012_scaffold_2kb_scaffold_226_62	(52671..53426)	-1	Lokiarchaeota	Lytic	K00571	E2.1.1.72; site-specific DNA-methyltransferase (adenine-specific) [EC:2.1.1.72]	251	Gene3D	G3DSA:3.40.50.150	Vaccinia Virus protein VP39	1	250	1.40E-53	TRUE			WP_094759964.1	33.1	254	145	3	1	241	1	242	6.70E-32	148.3	252	245	Planctomycetes	Sedimentisphaera salicampi	1941349	WP_094759964.1 site-specific DNA-methyltransferase [Sedimentisphaera salicampi]
`Fenrir Meg22_1012`	Meg22_1012_scaffold_2kb_scaffold_226_62	(52671..53426)	-1	Lokiarchaeota	Lytic	K00571	E2.1.1.72; site-specific DNA-methyltransferase (adenine-specific) [EC:2.1.1.72]	251	Gene3D	G3DSA:3.40.50.150	Vaccinia Virus protein VP39	1	250	1.40E-53	TRUE			OQX98672.1	35.1	245	143	4	4	233	7	250	1.00E-32	151	252	357	Bacteroidetes	Bacteroidetes bacterium 4572_128	1971633	OQX98672.1 DNA methyltransferase [Bacteroidetes bacterium 4572_128]
`Fenrir Meg22_1012`	Meg22_1012_scaffold_2kb_scaffold_226_62	(52671..53426)	-1	Lokiarchaeota	Lytic	K00571	E2.1.1.72; site-specific DNA-methyltransferase (adenine-specific) [EC:2.1.1.72]	251	Gene3D	G3DSA:3.40.50.150	Vaccinia Virus protein VP39	1	250	1.40E-53	TRUE			HGB32442.1	34.6	246	144	3	1	231	2	245	1.20E-33	154.1	252	261	N/A	N/A		HGB32442.1 site-specific DNA-methyltransferase [Candidatus Bathyarchaeota archaeon]
`Fenrir Meg22_1012`	Meg22_1012_scaffold_2kb_scaffold_226_62	(52671..53426)	-1	Lokiarchaeota	Lytic	K00571	E2.1.1.72; site-specific DNA-methyltransferase (adenine-specific) [EC:2.1.1.72]	251	Gene3D	G3DSA:3.40.50.150	Vaccinia Virus protein VP39	1	250	1.40E-53	TRUE			PMP73816.1	40.2	239	134	2	4	233	7	245	7.30E-47	198	252	259	Euryarchaeota	Aciduliprofundum sp.	2060325	PMP73816.1 hypothetical protein C0180_05770 [Aciduliprofundum sp.]
`Fenrir Meg22_1012`	Meg22_1012_scaffold_2kb_scaffold_226_62	(52671..53426)	-1	Lokiarchaeota	Lytic	K00571	E2.1.1.72; site-specific DNA-methyltransferase (adenine-specific) [EC:2.1.1.72]	251	Gene3D	G3DSA:3.40.50.150	Vaccinia Virus protein VP39	1	250	1.40E-53	TRUE			PMP74663.1	41.7	228	133	0	4	231	7	234	6.00E-49	204.9	252	250	Euryarchaeota	Aciduliprofundum sp.	2060325	PMP74663.1 hypothetical protein C0180_03575 [Aciduliprofundum sp.]
`Fenrir Meg22_1012`	Meg22_1012_scaffold_2kb_scaffold_226_62	(52671..53426)	-1	Lokiarchaeota	Lytic	K00571	E2.1.1.72; site-specific DNA-methyltransferase (adenine-specific) [EC:2.1.1.72]	251	Gene3D	G3DSA:3.40.50.150	Vaccinia Virus protein VP39	1	250	1.40E-53	TRUE			HHE88164.1	46	237	121	4	4	233	9	245	4.00E-53	218.8	252	247	N/A	N/A		HHE88164.1 site-specific DNA-methyltransferase [Firmicutes bacterium]
`Fenrir Meg22_1012`	Meg22_1012_scaffold_2kb_scaffold_226_62	(52671..53426)	-1	Lokiarchaeota	Lytic	K00571	E2.1.1.72; site-specific DNA-methyltransferase (adenine-specific) [EC:2.1.1.72]	251	Gene3D	G3DSA:3.40.50.150	Vaccinia Virus protein VP39	1	250	1.40E-53	TRUE			HGW54766.1	47.3	239	116	2	5	233	13	251	2.70E-57	232.6	252	265	N/A	N/A		HGW54766.1 hypothetical protein [Candidatus Margulisbacteria bacterium]
`Fenrir Meg22_1012`	Meg22_1012_scaffold_2kb_scaffold_226_62	(52671..53426)	-1	Lokiarchaeota	Lytic	K00571	E2.1.1.72; site-specific DNA-methyltransferase (adenine-specific) [EC:2.1.1.72]	251	Gene3D	G3DSA:3.40.50.150	Vaccinia Virus protein VP39	1	250	1.40E-53	TRUE			HHG53708.1	49	241	113	2	4	234	10	250	6.80E-61	244.6	252	258	N/A	N/A		HHG53708.1 hypothetical protein [Spirochaetes bacterium]
`Fenrir Meg22_1012`	Meg22_1012_scaffold_2kb_scaffold_226_62	(52671..53426)	-1	Lokiarchaeota	Lytic	K00571	E2.1.1.72; site-specific DNA-methyltransferase (adenine-specific) [EC:2.1.1.72]	251	SUPERFAMILY	SSF53335	S-adenosyl-L-methionine-dependent methyltransferase	2	236	1.98E-53	TRUE	IPR029063	S-adenosyl-L-methionine-dependent methyltransferase	KAB2904251.1	34.7	245	143	4	8	236	10	253	1.50E-31	147.1	252	385	Chloroflexi	Anaerolineae bacterium	2052143	KAB2904251.1 site-specific DNA-methyltransferase [Anaerolineae bacterium]
`Fenrir Meg22_1012`	Meg22_1012_scaffold_2kb_scaffold_226_62	(52671..53426)	-1	Lokiarchaeota	Lytic	K00571	E2.1.1.72; site-specific DNA-methyltransferase (adenine-specific) [EC:2.1.1.72]	251	SUPERFAMILY	SSF53335	S-adenosyl-L-methionine-dependent methyltransferase	2	236	1.98E-53	TRUE	IPR029063	S-adenosyl-L-methionine-dependent methyltransferase	HGB30860.1	35.5	242	145	5	1	236	2	238	6.70E-32	148.3	252	261	N/A	N/A		HGB30860.1 site-specific DNA-methyltransferase [Dictyoglomus turgidum]
`Fenrir Meg22_1012`	Meg22_1012_scaffold_2kb_scaffold_226_62	(52671..53426)	-1	Lokiarchaeota	Lytic	K00571	E2.1.1.72; site-specific DNA-methyltransferase (adenine-specific) [EC:2.1.1.72]	251	SUPERFAMILY	SSF53335	S-adenosyl-L-methionine-dependent methyltransferase	2	236	1.98E-53	TRUE	IPR029063	S-adenosyl-L-methionine-dependent methyltransferase	WP_094759964.1	33.1	254	145	3	1	241	1	242	6.70E-32	148.3	252	245	Planctomycetes	Sedimentisphaera salicampi	1941349	WP_094759964.1 site-specific DNA-methyltransferase [Sedimentisphaera salicampi]
`Fenrir Meg22_1012`	Meg22_1012_scaffold_2kb_scaffold_226_62	(52671..53426)	-1	Lokiarchaeota	Lytic	K00571	E2.1.1.72; site-specific DNA-methyltransferase (adenine-specific) [EC:2.1.1.72]	251	SUPERFAMILY	SSF53335	S-adenosyl-L-methionine-dependent methyltransferase	2	236	1.98E-53	TRUE	IPR029063	S-adenosyl-L-methionine-dependent methyltransferase	OQX98672.1	35.1	245	143	4	4	233	7	250	1.00E-32	151	252	357	Bacteroidetes	Bacteroidetes bacterium 4572_128	1971633	OQX98672.1 DNA methyltransferase [Bacteroidetes bacterium 4572_128]
`Fenrir Meg22_1012`	Meg22_1012_scaffold_2kb_scaffold_226_62	(52671..53426)	-1	Lokiarchaeota	Lytic	K00571	E2.1.1.72; site-specific DNA-methyltransferase (adenine-specific) [EC:2.1.1.72]	251	SUPERFAMILY	SSF53335	S-adenosyl-L-methionine-dependent methyltransferase	2	236	1.98E-53	TRUE	IPR029063	S-adenosyl-L-methionine-dependent methyltransferase	HGB32442.1	34.6	246	144	3	1	231	2	245	1.20E-33	154.1	252	261	N/A	N/A		HGB32442.1 site-specific DNA-methyltransferase [Candidatus Bathyarchaeota archaeon]
`Fenrir Meg22_1012`	Meg22_1012_scaffold_2kb_scaffold_226_62	(52671..53426)	-1	Lokiarchaeota	Lytic	K00571	E2.1.1.72; site-specific DNA-methyltransferase (adenine-specific) [EC:2.1.1.72]	251	SUPERFAMILY	SSF53335	S-adenosyl-L-methionine-dependent methyltransferase	2	236	1.98E-53	TRUE	IPR029063	S-adenosyl-L-methionine-dependent methyltransferase	PMP73816.1	40.2	239	134	2	4	233	7	245	7.30E-47	198	252	259	Euryarchaeota	Aciduliprofundum sp.	2060325	PMP73816.1 hypothetical protein C0180_05770 [Aciduliprofundum sp.]
`Fenrir Meg22_1012`	Meg22_1012_scaffold_2kb_scaffold_226_62	(52671..53426)	-1	Lokiarchaeota	Lytic	K00571	E2.1.1.72; site-specific DNA-methyltransferase (adenine-specific) [EC:2.1.1.72]	251	SUPERFAMILY	SSF53335	S-adenosyl-L-methionine-dependent methyltransferase	2	236	1.98E-53	TRUE	IPR029063	S-adenosyl-L-methionine-dependent methyltransferase	PMP74663.1	41.7	228	133	0	4	231	7	234	6.00E-49	204.9	252	250	Euryarchaeota	Aciduliprofundum sp.	2060325	PMP74663.1 hypothetical protein C0180_03575 [Aciduliprofundum sp.]
`Fenrir Meg22_1012`	Meg22_1012_scaffold_2kb_scaffold_226_62	(52671..53426)	-1	Lokiarchaeota	Lytic	K00571	E2.1.1.72; site-specific DNA-methyltransferase (adenine-specific) [EC:2.1.1.72]	251	SUPERFAMILY	SSF53335	S-adenosyl-L-methionine-dependent methyltransferase	2	236	1.98E-53	TRUE	IPR029063	S-adenosyl-L-methionine-dependent methyltransferase	HHE88164.1	46	237	121	4	4	233	9	245	4.00E-53	218.8	252	247	N/A	N/A		HHE88164.1 site-specific DNA-methyltransferase [Firmicutes bacterium]
`Fenrir Meg22_1012`	Meg22_1012_scaffold_2kb_scaffold_226_62	(52671..53426)	-1	Lokiarchaeota	Lytic	K00571	E2.1.1.72; site-specific DNA-methyltransferase (adenine-specific) [EC:2.1.1.72]	251	SUPERFAMILY	SSF53335	S-adenosyl-L-methionine-dependent methyltransferase	2	236	1.98E-53	TRUE	IPR029063	S-adenosyl-L-methionine-dependent methyltransferase	HGW54766.1	47.3	239	116	2	5	233	13	251	2.70E-57	232.6	252	265	N/A	N/A		HGW54766.1 hypothetical protein [Candidatus Margulisbacteria bacterium]
`Fenrir Meg22_1012`	Meg22_1012_scaffold_2kb_scaffold_226_62	(52671..53426)	-1	Lokiarchaeota	Lytic	K00571	E2.1.1.72; site-specific DNA-methyltransferase (adenine-specific) [EC:2.1.1.72]	251	SUPERFAMILY	SSF53335	S-adenosyl-L-methionine-dependent methyltransferase	2	236	1.98E-53	TRUE	IPR029063	S-adenosyl-L-methionine-dependent methyltransferase	HHG53708.1	49	241	113	2	4	234	10	250	6.80E-61	244.6	252	258	N/A	N/A		HHG53708.1 hypothetical protein [Spirochaetes bacterium]
`Fenrir Meg22_1012`	Meg22_1012_scaffold_2kb_scaffold_226_62	(52671..53426)	-1	Lokiarchaeota	Lytic	K00571	E2.1.1.72; site-specific DNA-methyltransferase (adenine-specific) [EC:2.1.1.72]	251	PRINTS	PR00508	S21 class N4 adenine-specific DNA methyltransferase signature	21	35	2.70E-31	TRUE	IPR001091	Restriction/modification DNA-methylase	KAB2904251.1	34.7	245	143	4	8	236	10	253	1.50E-31	147.1	252	385	Chloroflexi	Anaerolineae bacterium	2052143	KAB2904251.1 site-specific DNA-methyltransferase [Anaerolineae bacterium]
`Fenrir Meg22_1012`	Meg22_1012_scaffold_2kb_scaffold_226_62	(52671..53426)	-1	Lokiarchaeota	Lytic	K00571	E2.1.1.72; site-specific DNA-methyltransferase (adenine-specific) [EC:2.1.1.72]	251	PRINTS	PR00508	S21 class N4 adenine-specific DNA methyltransferase signature	21	35	2.70E-31	TRUE	IPR001091	Restriction/modification DNA-methylase	HGB30860.1	35.5	242	145	5	1	236	2	238	6.70E-32	148.3	252	261	N/A	N/A		HGB30860.1 site-specific DNA-methyltransferase [Dictyoglomus turgidum]
`Fenrir Meg22_1012`	Meg22_1012_scaffold_2kb_scaffold_226_62	(52671..53426)	-1	Lokiarchaeota	Lytic	K00571	E2.1.1.72; site-specific DNA-methyltransferase (adenine-specific) [EC:2.1.1.72]	251	PRINTS	PR00508	S21 class N4 adenine-specific DNA methyltransferase signature	21	35	2.70E-31	TRUE	IPR001091	Restriction/modification DNA-methylase	WP_094759964.1	33.1	254	145	3	1	241	1	242	6.70E-32	148.3	252	245	Planctomycetes	Sedimentisphaera salicampi	1941349	WP_094759964.1 site-specific DNA-methyltransferase [Sedimentisphaera salicampi]
`Fenrir Meg22_1012`	Meg22_1012_scaffold_2kb_scaffold_226_62	(52671..53426)	-1	Lokiarchaeota	Lytic	K00571	E2.1.1.72; site-specific DNA-methyltransferase (adenine-specific) [EC:2.1.1.72]	251	PRINTS	PR00508	S21 class N4 adenine-specific DNA methyltransferase signature	21	35	2.70E-31	TRUE	IPR001091	Restriction/modification DNA-methylase	OQX98672.1	35.1	245	143	4	4	233	7	250	1.00E-32	151	252	357	Bacteroidetes	Bacteroidetes bacterium 4572_128	1971633	OQX98672.1 DNA methyltransferase [Bacteroidetes bacterium 4572_128]
`Fenrir Meg22_1012`	Meg22_1012_scaffold_2kb_scaffold_226_62	(52671..53426)	-1	Lokiarchaeota	Lytic	K00571	E2.1.1.72; site-specific DNA-methyltransferase (adenine-specific) [EC:2.1.1.72]	251	PRINTS	PR00508	S21 class N4 adenine-specific DNA methyltransferase signature	21	35	2.70E-31	TRUE	IPR001091	Restriction/modification DNA-methylase	HGB32442.1	34.6	246	144	3	1	231	2	245	1.20E-33	154.1	252	261	N/A	N/A		HGB32442.1 site-specific DNA-methyltransferase [Candidatus Bathyarchaeota archaeon]
`Fenrir Meg22_1012`	Meg22_1012_scaffold_2kb_scaffold_226_62	(52671..53426)	-1	Lokiarchaeota	Lytic	K00571	E2.1.1.72; site-specific DNA-methyltransferase (adenine-specific) [EC:2.1.1.72]	251	PRINTS	PR00508	S21 class N4 adenine-specific DNA methyltransferase signature	21	35	2.70E-31	TRUE	IPR001091	Restriction/modification DNA-methylase	PMP73816.1	40.2	239	134	2	4	233	7	245	7.30E-47	198	252	259	Euryarchaeota	Aciduliprofundum sp.	2060325	PMP73816.1 hypothetical protein C0180_05770 [Aciduliprofundum sp.]
`Fenrir Meg22_1012`	Meg22_1012_scaffold_2kb_scaffold_226_62	(52671..53426)	-1	Lokiarchaeota	Lytic	K00571	E2.1.1.72; site-specific DNA-methyltransferase (adenine-specific) [EC:2.1.1.72]	251	PRINTS	PR00508	S21 class N4 adenine-specific DNA methyltransferase signature	21	35	2.70E-31	TRUE	IPR001091	Restriction/modification DNA-methylase	PMP74663.1	41.7	228	133	0	4	231	7	234	6.00E-49	204.9	252	250	Euryarchaeota	Aciduliprofundum sp.	2060325	PMP74663.1 hypothetical protein C0180_03575 [Aciduliprofundum sp.]
`Fenrir Meg22_1012`	Meg22_1012_scaffold_2kb_scaffold_226_62	(52671..53426)	-1	Lokiarchaeota	Lytic	K00571	E2.1.1.72; site-specific DNA-methyltransferase (adenine-specific) [EC:2.1.1.72]	251	PRINTS	PR00508	S21 class N4 adenine-specific DNA methyltransferase signature	21	35	2.70E-31	TRUE	IPR001091	Restriction/modification DNA-methylase	HHE88164.1	46	237	121	4	4	233	9	245	4.00E-53	218.8	252	247	N/A	N/A		HHE88164.1 site-specific DNA-methyltransferase [Firmicutes bacterium]
`Fenrir Meg22_1012`	Meg22_1012_scaffold_2kb_scaffold_226_62	(52671..53426)	-1	Lokiarchaeota	Lytic	K00571	E2.1.1.72; site-specific DNA-methyltransferase (adenine-specific) [EC:2.1.1.72]	251	PRINTS	PR00508	S21 class N4 adenine-specific DNA methyltransferase signature	21	35	2.70E-31	TRUE	IPR001091	Restriction/modification DNA-methylase	HGW54766.1	47.3	239	116	2	5	233	13	251	2.70E-57	232.6	252	265	N/A	N/A		HGW54766.1 hypothetical protein [Candidatus Margulisbacteria bacterium]
`Fenrir Meg22_1012`	Meg22_1012_scaffold_2kb_scaffold_226_62	(52671..53426)	-1	Lokiarchaeota	Lytic	K00571	E2.1.1.72; site-specific DNA-methyltransferase (adenine-specific) [EC:2.1.1.72]	251	PRINTS	PR00508	S21 class N4 adenine-specific DNA methyltransferase signature	21	35	2.70E-31	TRUE	IPR001091	Restriction/modification DNA-methylase	HHG53708.1	49	241	113	2	4	234	10	250	6.80E-61	244.6	252	258	N/A	N/A		HHG53708.1 hypothetical protein [Spirochaetes bacterium]
`Fenrir Meg22_1012`	Meg22_1012_scaffold_2kb_scaffold_226_62	(52671..53426)	-1	Lokiarchaeota	Lytic	K00571	E2.1.1.72; site-specific DNA-methyltransferase (adenine-specific) [EC:2.1.1.72]	251	Pfam	PF01555	DNA methylase	22	229	5.30E-35	TRUE	IPR002941	DNA methylase N-4/N-6	KAB2904251.1	34.7	245	143	4	8	236	10	253	1.50E-31	147.1	252	385	Chloroflexi	Anaerolineae bacterium	2052143	KAB2904251.1 site-specific DNA-methyltransferase [Anaerolineae bacterium]
`Fenrir Meg22_1012`	Meg22_1012_scaffold_2kb_scaffold_226_62	(52671..53426)	-1	Lokiarchaeota	Lytic	K00571	E2.1.1.72; site-specific DNA-methyltransferase (adenine-specific) [EC:2.1.1.72]	251	Pfam	PF01555	DNA methylase	22	229	5.30E-35	TRUE	IPR002941	DNA methylase N-4/N-6	HGB30860.1	35.5	242	145	5	1	236	2	238	6.70E-32	148.3	252	261	N/A	N/A		HGB30860.1 site-specific DNA-methyltransferase [Dictyoglomus turgidum]
`Fenrir Meg22_1012`	Meg22_1012_scaffold_2kb_scaffold_226_62	(52671..53426)	-1	Lokiarchaeota	Lytic	K00571	E2.1.1.72; site-specific DNA-methyltransferase (adenine-specific) [EC:2.1.1.72]	251	Pfam	PF01555	DNA methylase	22	229	5.30E-35	TRUE	IPR002941	DNA methylase N-4/N-6	WP_094759964.1	33.1	254	145	3	1	241	1	242	6.70E-32	148.3	252	245	Planctomycetes	Sedimentisphaera salicampi	1941349	WP_094759964.1 site-specific DNA-methyltransferase [Sedimentisphaera salicampi]
`Fenrir Meg22_1012`	Meg22_1012_scaffold_2kb_scaffold_226_62	(52671..53426)	-1	Lokiarchaeota	Lytic	K00571	E2.1.1.72; site-specific DNA-methyltransferase (adenine-specific) [EC:2.1.1.72]	251	Pfam	PF01555	DNA methylase	22	229	5.30E-35	TRUE	IPR002941	DNA methylase N-4/N-6	OQX98672.1	35.1	245	143	4	4	233	7	250	1.00E-32	151	252	357	Bacteroidetes	Bacteroidetes bacterium 4572_128	1971633	OQX98672.1 DNA methyltransferase [Bacteroidetes bacterium 4572_128]
`Fenrir Meg22_1012`	Meg22_1012_scaffold_2kb_scaffold_226_62	(52671..53426)	-1	Lokiarchaeota	Lytic	K00571	E2.1.1.72; site-specific DNA-methyltransferase (adenine-specific) [EC:2.1.1.72]	251	Pfam	PF01555	DNA methylase	22	229	5.30E-35	TRUE	IPR002941	DNA methylase N-4/N-6	HGB32442.1	34.6	246	144	3	1	231	2	245	1.20E-33	154.1	252	261	N/A	N/A		HGB32442.1 site-specific DNA-methyltransferase [Candidatus Bathyarchaeota archaeon]
`Fenrir Meg22_1012`	Meg22_1012_scaffold_2kb_scaffold_226_62	(52671..53426)	-1	Lokiarchaeota	Lytic	K00571	E2.1.1.72; site-specific DNA-methyltransferase (adenine-specific) [EC:2.1.1.72]	251	Pfam	PF01555	DNA methylase	22	229	5.30E-35	TRUE	IPR002941	DNA methylase N-4/N-6	PMP73816.1	40.2	239	134	2	4	233	7	245	7.30E-47	198	252	259	Euryarchaeota	Aciduliprofundum sp.	2060325	PMP73816.1 hypothetical protein C0180_05770 [Aciduliprofundum sp.]
`Fenrir Meg22_1012`	Meg22_1012_scaffold_2kb_scaffold_226_62	(52671..53426)	-1	Lokiarchaeota	Lytic	K00571	E2.1.1.72; site-specific DNA-methyltransferase (adenine-specific) [EC:2.1.1.72]	251	Pfam	PF01555	DNA methylase	22	229	5.30E-35	TRUE	IPR002941	DNA methylase N-4/N-6	PMP74663.1	41.7	228	133	0	4	231	7	234	6.00E-49	204.9	252	250	Euryarchaeota	Aciduliprofundum sp.	2060325	PMP74663.1 hypothetical protein C0180_03575 [Aciduliprofundum sp.]
`Fenrir Meg22_1012`	Meg22_1012_scaffold_2kb_scaffold_226_62	(52671..53426)	-1	Lokiarchaeota	Lytic	K00571	E2.1.1.72; site-specific DNA-methyltransferase (adenine-specific) [EC:2.1.1.72]	251	Pfam	PF01555	DNA methylase	22	229	5.30E-35	TRUE	IPR002941	DNA methylase N-4/N-6	HHE88164.1	46	237	121	4	4	233	9	245	4.00E-53	218.8	252	247	N/A	N/A		HHE88164.1 site-specific DNA-methyltransferase [Firmicutes bacterium]
`Fenrir Meg22_1012`	Meg22_1012_scaffold_2kb_scaffold_226_62	(52671..53426)	-1	Lokiarchaeota	Lytic	K00571	E2.1.1.72; site-specific DNA-methyltransferase (adenine-specific) [EC:2.1.1.72]	251	Pfam	PF01555	DNA methylase	22	229	5.30E-35	TRUE	IPR002941	DNA methylase N-4/N-6	HGW54766.1	47.3	239	116	2	5	233	13	251	2.70E-57	232.6	252	265	N/A	N/A		HGW54766.1 hypothetical protein [Candidatus Margulisbacteria bacterium]
`Fenrir Meg22_1012`	Meg22_1012_scaffold_2kb_scaffold_226_62	(52671..53426)	-1	Lokiarchaeota	Lytic	K00571	E2.1.1.72; site-specific DNA-methyltransferase (adenine-specific) [EC:2.1.1.72]	251	Pfam	PF01555	DNA methylase	22	229	5.30E-35	TRUE	IPR002941	DNA methylase N-4/N-6	HHG53708.1	49	241	113	2	4	234	10	250	6.80E-61	244.6	252	258	N/A	N/A		HHG53708.1 hypothetical protein [Spirochaetes bacterium]
`Fenrir Meg22_1012`	Meg22_1012_scaffold_2kb_scaffold_226_62	(52671..53426)	-1	Lokiarchaeota	Lytic	K00571	E2.1.1.72; site-specific DNA-methyltransferase (adenine-specific) [EC:2.1.1.72]	251	PRINTS	PR00508	S21 class N4 adenine-specific DNA methyltransferase signature	70	90	2.70E-31	TRUE	IPR001091	Restriction/modification DNA-methylase	KAB2904251.1	34.7	245	143	4	8	236	10	253	1.50E-31	147.1	252	385	Chloroflexi	Anaerolineae bacterium	2052143	KAB2904251.1 site-specific DNA-methyltransferase [Anaerolineae bacterium]
`Fenrir Meg22_1012`	Meg22_1012_scaffold_2kb_scaffold_226_62	(52671..53426)	-1	Lokiarchaeota	Lytic	K00571	E2.1.1.72; site-specific DNA-methyltransferase (adenine-specific) [EC:2.1.1.72]	251	PRINTS	PR00508	S21 class N4 adenine-specific DNA methyltransferase signature	70	90	2.70E-31	TRUE	IPR001091	Restriction/modification DNA-methylase	HGB30860.1	35.5	242	145	5	1	236	2	238	6.70E-32	148.3	252	261	N/A	N/A		HGB30860.1 site-specific DNA-methyltransferase [Dictyoglomus turgidum]
`Fenrir Meg22_1012`	Meg22_1012_scaffold_2kb_scaffold_226_62	(52671..53426)	-1	Lokiarchaeota	Lytic	K00571	E2.1.1.72; site-specific DNA-methyltransferase (adenine-specific) [EC:2.1.1.72]	251	PRINTS	PR00508	S21 class N4 adenine-specific DNA methyltransferase signature	70	90	2.70E-31	TRUE	IPR001091	Restriction/modification DNA-methylase	WP_094759964.1	33.1	254	145	3	1	241	1	242	6.70E-32	148.3	252	245	Planctomycetes	Sedimentisphaera salicampi	1941349	WP_094759964.1 site-specific DNA-methyltransferase [Sedimentisphaera salicampi]
`Fenrir Meg22_1012`	Meg22_1012_scaffold_2kb_scaffold_226_62	(52671..53426)	-1	Lokiarchaeota	Lytic	K00571	E2.1.1.72; site-specific DNA-methyltransferase (adenine-specific) [EC:2.1.1.72]	251	PRINTS	PR00508	S21 class N4 adenine-specific DNA methyltransferase signature	70	90	2.70E-31	TRUE	IPR001091	Restriction/modification DNA-methylase	OQX98672.1	35.1	245	143	4	4	233	7	250	1.00E-32	151	252	357	Bacteroidetes	Bacteroidetes bacterium 4572_128	1971633	OQX98672.1 DNA methyltransferase [Bacteroidetes bacterium 4572_128]
`Fenrir Meg22_1012`	Meg22_1012_scaffold_2kb_scaffold_226_62	(52671..53426)	-1	Lokiarchaeota	Lytic	K00571	E2.1.1.72; site-specific DNA-methyltransferase (adenine-specific) [EC:2.1.1.72]	251	PRINTS	PR00508	S21 class N4 adenine-specific DNA methyltransferase signature	70	90	2.70E-31	TRUE	IPR001091	Restriction/modification DNA-methylase	HGB32442.1	34.6	246	144	3	1	231	2	245	1.20E-33	154.1	252	261	N/A	N/A		HGB32442.1 site-specific DNA-methyltransferase [Candidatus Bathyarchaeota archaeon]
`Fenrir Meg22_1012`	Meg22_1012_scaffold_2kb_scaffold_226_62	(52671..53426)	-1	Lokiarchaeota	Lytic	K00571	E2.1.1.72; site-specific DNA-methyltransferase (adenine-specific) [EC:2.1.1.72]	251	PRINTS	PR00508	S21 class N4 adenine-specific DNA methyltransferase signature	70	90	2.70E-31	TRUE	IPR001091	Restriction/modification DNA-methylase	PMP73816.1	40.2	239	134	2	4	233	7	245	7.30E-47	198	252	259	Euryarchaeota	Aciduliprofundum sp.	2060325	PMP73816.1 hypothetical protein C0180_05770 [Aciduliprofundum sp.]
`Fenrir Meg22_1012`	Meg22_1012_scaffold_2kb_scaffold_226_62	(52671..53426)	-1	Lokiarchaeota	Lytic	K00571	E2.1.1.72; site-specific DNA-methyltransferase (adenine-specific) [EC:2.1.1.72]	251	PRINTS	PR00508	S21 class N4 adenine-specific DNA methyltransferase signature	70	90	2.70E-31	TRUE	IPR001091	Restriction/modification DNA-methylase	PMP74663.1	41.7	228	133	0	4	231	7	234	6.00E-49	204.9	252	250	Euryarchaeota	Aciduliprofundum sp.	2060325	PMP74663.1 hypothetical protein C0180_03575 [Aciduliprofundum sp.]
`Fenrir Meg22_1012`	Meg22_1012_scaffold_2kb_scaffold_226_62	(52671..53426)	-1	Lokiarchaeota	Lytic	K00571	E2.1.1.72; site-specific DNA-methyltransferase (adenine-specific) [EC:2.1.1.72]	251	PRINTS	PR00508	S21 class N4 adenine-specific DNA methyltransferase signature	70	90	2.70E-31	TRUE	IPR001091	Restriction/modification DNA-methylase	HHE88164.1	46	237	121	4	4	233	9	245	4.00E-53	218.8	252	247	N/A	N/A		HHE88164.1 site-specific DNA-methyltransferase [Firmicutes bacterium]
`Fenrir Meg22_1012`	Meg22_1012_scaffold_2kb_scaffold_226_62	(52671..53426)	-1	Lokiarchaeota	Lytic	K00571	E2.1.1.72; site-specific DNA-methyltransferase (adenine-specific) [EC:2.1.1.72]	251	PRINTS	PR00508	S21 class N4 adenine-specific DNA methyltransferase signature	70	90	2.70E-31	TRUE	IPR001091	Restriction/modification DNA-methylase	HGW54766.1	47.3	239	116	2	5	233	13	251	2.70E-57	232.6	252	265	N/A	N/A		HGW54766.1 hypothetical protein [Candidatus Margulisbacteria bacterium]
`Fenrir Meg22_1012`	Meg22_1012_scaffold_2kb_scaffold_226_62	(52671..53426)	-1	Lokiarchaeota	Lytic	K00571	E2.1.1.72; site-specific DNA-methyltransferase (adenine-specific) [EC:2.1.1.72]	251	PRINTS	PR00508	S21 class N4 adenine-specific DNA methyltransferase signature	70	90	2.70E-31	TRUE	IPR001091	Restriction/modification DNA-methylase	HHG53708.1	49	241	113	2	4	234	10	250	6.80E-61	244.6	252	258	N/A	N/A		HHG53708.1 hypothetical protein [Spirochaetes bacterium]
`Fenrir Meg22_1012`	Meg22_1012_scaffold_2kb_scaffold_226_62	(52671..53426)	-1	Lokiarchaeota	Lytic	K00571	E2.1.1.72; site-specific DNA-methyltransferase (adenine-specific) [EC:2.1.1.72]	251	PRINTS	PR00508	S21 class N4 adenine-specific DNA methyltransferase signature	170	187	2.70E-31	TRUE	IPR001091	Restriction/modification DNA-methylase	KAB2904251.1	34.7	245	143	4	8	236	10	253	1.50E-31	147.1	252	385	Chloroflexi	Anaerolineae bacterium	2052143	KAB2904251.1 site-specific DNA-methyltransferase [Anaerolineae bacterium]
`Fenrir Meg22_1012`	Meg22_1012_scaffold_2kb_scaffold_226_62	(52671..53426)	-1	Lokiarchaeota	Lytic	K00571	E2.1.1.72; site-specific DNA-methyltransferase (adenine-specific) [EC:2.1.1.72]	251	PRINTS	PR00508	S21 class N4 adenine-specific DNA methyltransferase signature	170	187	2.70E-31	TRUE	IPR001091	Restriction/modification DNA-methylase	HGB30860.1	35.5	242	145	5	1	236	2	238	6.70E-32	148.3	252	261	N/A	N/A		HGB30860.1 site-specific DNA-methyltransferase [Dictyoglomus turgidum]
`Fenrir Meg22_1012`	Meg22_1012_scaffold_2kb_scaffold_226_62	(52671..53426)	-1	Lokiarchaeota	Lytic	K00571	E2.1.1.72; site-specific DNA-methyltransferase (adenine-specific) [EC:2.1.1.72]	251	PRINTS	PR00508	S21 class N4 adenine-specific DNA methyltransferase signature	170	187	2.70E-31	TRUE	IPR001091	Restriction/modification DNA-methylase	WP_094759964.1	33.1	254	145	3	1	241	1	242	6.70E-32	148.3	252	245	Planctomycetes	Sedimentisphaera salicampi	1941349	WP_094759964.1 site-specific DNA-methyltransferase [Sedimentisphaera salicampi]
`Fenrir Meg22_1012`	Meg22_1012_scaffold_2kb_scaffold_226_62	(52671..53426)	-1	Lokiarchaeota	Lytic	K00571	E2.1.1.72; site-specific DNA-methyltransferase (adenine-specific) [EC:2.1.1.72]	251	PRINTS	PR00508	S21 class N4 adenine-specific DNA methyltransferase signature	170	187	2.70E-31	TRUE	IPR001091	Restriction/modification DNA-methylase	OQX98672.1	35.1	245	143	4	4	233	7	250	1.00E-32	151	252	357	Bacteroidetes	Bacteroidetes bacterium 4572_128	1971633	OQX98672.1 DNA methyltransferase [Bacteroidetes bacterium 4572_128]
`Fenrir Meg22_1012`	Meg22_1012_scaffold_2kb_scaffold_226_62	(52671..53426)	-1	Lokiarchaeota	Lytic	K00571	E2.1.1.72; site-specific DNA-methyltransferase (adenine-specific) [EC:2.1.1.72]	251	PRINTS	PR00508	S21 class N4 adenine-specific DNA methyltransferase signature	170	187	2.70E-31	TRUE	IPR001091	Restriction/modification DNA-methylase	HGB32442.1	34.6	246	144	3	1	231	2	245	1.20E-33	154.1	252	261	N/A	N/A		HGB32442.1 site-specific DNA-methyltransferase [Candidatus Bathyarchaeota archaeon]
`Fenrir Meg22_1012`	Meg22_1012_scaffold_2kb_scaffold_226_62	(52671..53426)	-1	Lokiarchaeota	Lytic	K00571	E2.1.1.72; site-specific DNA-methyltransferase (adenine-specific) [EC:2.1.1.72]	251	PRINTS	PR00508	S21 class N4 adenine-specific DNA methyltransferase signature	170	187	2.70E-31	TRUE	IPR001091	Restriction/modification DNA-methylase	PMP73816.1	40.2	239	134	2	4	233	7	245	7.30E-47	198	252	259	Euryarchaeota	Aciduliprofundum sp.	2060325	PMP73816.1 hypothetical protein C0180_05770 [Aciduliprofundum sp.]
`Fenrir Meg22_1012`	Meg22_1012_scaffold_2kb_scaffold_226_62	(52671..53426)	-1	Lokiarchaeota	Lytic	K00571	E2.1.1.72; site-specific DNA-methyltransferase (adenine-specific) [EC:2.1.1.72]	251	PRINTS	PR00508	S21 class N4 adenine-specific DNA methyltransferase signature	170	187	2.70E-31	TRUE	IPR001091	Restriction/modification DNA-methylase	PMP74663.1	41.7	228	133	0	4	231	7	234	6.00E-49	204.9	252	250	Euryarchaeota	Aciduliprofundum sp.	2060325	PMP74663.1 hypothetical protein C0180_03575 [Aciduliprofundum sp.]
`Fenrir Meg22_1012`	Meg22_1012_scaffold_2kb_scaffold_226_62	(52671..53426)	-1	Lokiarchaeota	Lytic	K00571	E2.1.1.72; site-specific DNA-methyltransferase (adenine-specific) [EC:2.1.1.72]	251	PRINTS	PR00508	S21 class N4 adenine-specific DNA methyltransferase signature	170	187	2.70E-31	TRUE	IPR001091	Restriction/modification DNA-methylase	HHE88164.1	46	237	121	4	4	233	9	245	4.00E-53	218.8	252	247	N/A	N/A		HHE88164.1 site-specific DNA-methyltransferase [Firmicutes bacterium]
`Fenrir Meg22_1012`	Meg22_1012_scaffold_2kb_scaffold_226_62	(52671..53426)	-1	Lokiarchaeota	Lytic	K00571	E2.1.1.72; site-specific DNA-methyltransferase (adenine-specific) [EC:2.1.1.72]	251	PRINTS	PR00508	S21 class N4 adenine-specific DNA methyltransferase signature	170	187	2.70E-31	TRUE	IPR001091	Restriction/modification DNA-methylase	HGW54766.1	47.3	239	116	2	5	233	13	251	2.70E-57	232.6	252	265	N/A	N/A		HGW54766.1 hypothetical protein [Candidatus Margulisbacteria bacterium]
`Fenrir Meg22_1012`	Meg22_1012_scaffold_2kb_scaffold_226_62	(52671..53426)	-1	Lokiarchaeota	Lytic	K00571	E2.1.1.72; site-specific DNA-methyltransferase (adenine-specific) [EC:2.1.1.72]	251	PRINTS	PR00508	S21 class N4 adenine-specific DNA methyltransferase signature	170	187	2.70E-31	TRUE	IPR001091	Restriction/modification DNA-methylase	HHG53708.1	49	241	113	2	4	234	10	250	6.80E-61	244.6	252	258	N/A	N/A		HHG53708.1 hypothetical protein [Spirochaetes bacterium]
`Fenrir Meg22_1012`	Meg22_1012_scaffold_2kb_scaffold_226_62	(52671..53426)	-1	Lokiarchaeota	Lytic	K00571	E2.1.1.72; site-specific DNA-methyltransferase (adenine-specific) [EC:2.1.1.72]	251	PRINTS	PR00508	S21 class N4 adenine-specific DNA methyltransferase signature	189	207	2.70E-31	TRUE	IPR001091	Restriction/modification DNA-methylase	KAB2904251.1	34.7	245	143	4	8	236	10	253	1.50E-31	147.1	252	385	Chloroflexi	Anaerolineae bacterium	2052143	KAB2904251.1 site-specific DNA-methyltransferase [Anaerolineae bacterium]
`Fenrir Meg22_1012`	Meg22_1012_scaffold_2kb_scaffold_226_62	(52671..53426)	-1	Lokiarchaeota	Lytic	K00571	E2.1.1.72; site-specific DNA-methyltransferase (adenine-specific) [EC:2.1.1.72]	251	PRINTS	PR00508	S21 class N4 adenine-specific DNA methyltransferase signature	189	207	2.70E-31	TRUE	IPR001091	Restriction/modification DNA-methylase	HGB30860.1	35.5	242	145	5	1	236	2	238	6.70E-32	148.3	252	261	N/A	N/A		HGB30860.1 site-specific DNA-methyltransferase [Dictyoglomus turgidum]
`Fenrir Meg22_1012`	Meg22_1012_scaffold_2kb_scaffold_226_62	(52671..53426)	-1	Lokiarchaeota	Lytic	K00571	E2.1.1.72; site-specific DNA-methyltransferase (adenine-specific) [EC:2.1.1.72]	251	PRINTS	PR00508	S21 class N4 adenine-specific DNA methyltransferase signature	189	207	2.70E-31	TRUE	IPR001091	Restriction/modification DNA-methylase	WP_094759964.1	33.1	254	145	3	1	241	1	242	6.70E-32	148.3	252	245	Planctomycetes	Sedimentisphaera salicampi	1941349	WP_094759964.1 site-specific DNA-methyltransferase [Sedimentisphaera salicampi]
`Fenrir Meg22_1012`	Meg22_1012_scaffold_2kb_scaffold_226_62	(52671..53426)	-1	Lokiarchaeota	Lytic	K00571	E2.1.1.72; site-specific DNA-methyltransferase (adenine-specific) [EC:2.1.1.72]	251	PRINTS	PR00508	S21 class N4 adenine-specific DNA methyltransferase signature	189	207	2.70E-31	TRUE	IPR001091	Restriction/modification DNA-methylase	OQX98672.1	35.1	245	143	4	4	233	7	250	1.00E-32	151	252	357	Bacteroidetes	Bacteroidetes bacterium 4572_128	1971633	OQX98672.1 DNA methyltransferase [Bacteroidetes bacterium 4572_128]
`Fenrir Meg22_1012`	Meg22_1012_scaffold_2kb_scaffold_226_62	(52671..53426)	-1	Lokiarchaeota	Lytic	K00571	E2.1.1.72; site-specific DNA-methyltransferase (adenine-specific) [EC:2.1.1.72]	251	PRINTS	PR00508	S21 class N4 adenine-specific DNA methyltransferase signature	189	207	2.70E-31	TRUE	IPR001091	Restriction/modification DNA-methylase	HGB32442.1	34.6	246	144	3	1	231	2	245	1.20E-33	154.1	252	261	N/A	N/A		HGB32442.1 site-specific DNA-methyltransferase [Candidatus Bathyarchaeota archaeon]
`Fenrir Meg22_1012`	Meg22_1012_scaffold_2kb_scaffold_226_62	(52671..53426)	-1	Lokiarchaeota	Lytic	K00571	E2.1.1.72; site-specific DNA-methyltransferase (adenine-specific) [EC:2.1.1.72]	251	PRINTS	PR00508	S21 class N4 adenine-specific DNA methyltransferase signature	189	207	2.70E-31	TRUE	IPR001091	Restriction/modification DNA-methylase	PMP73816.1	40.2	239	134	2	4	233	7	245	7.30E-47	198	252	259	Euryarchaeota	Aciduliprofundum sp.	2060325	PMP73816.1 hypothetical protein C0180_05770 [Aciduliprofundum sp.]
`Fenrir Meg22_1012`	Meg22_1012_scaffold_2kb_scaffold_226_62	(52671..53426)	-1	Lokiarchaeota	Lytic	K00571	E2.1.1.72; site-specific DNA-methyltransferase (adenine-specific) [EC:2.1.1.72]	251	PRINTS	PR00508	S21 class N4 adenine-specific DNA methyltransferase signature	189	207	2.70E-31	TRUE	IPR001091	Restriction/modification DNA-methylase	PMP74663.1	41.7	228	133	0	4	231	7	234	6.00E-49	204.9	252	250	Euryarchaeota	Aciduliprofundum sp.	2060325	PMP74663.1 hypothetical protein C0180_03575 [Aciduliprofundum sp.]
`Fenrir Meg22_1012`	Meg22_1012_scaffold_2kb_scaffold_226_62	(52671..53426)	-1	Lokiarchaeota	Lytic	K00571	E2.1.1.72; site-specific DNA-methyltransferase (adenine-specific) [EC:2.1.1.72]	251	PRINTS	PR00508	S21 class N4 adenine-specific DNA methyltransferase signature	189	207	2.70E-31	TRUE	IPR001091	Restriction/modification DNA-methylase	HHE88164.1	46	237	121	4	4	233	9	245	4.00E-53	218.8	252	247	N/A	N/A		HHE88164.1 site-specific DNA-methyltransferase [Firmicutes bacterium]
`Fenrir Meg22_1012`	Meg22_1012_scaffold_2kb_scaffold_226_62	(52671..53426)	-1	Lokiarchaeota	Lytic	K00571	E2.1.1.72; site-specific DNA-methyltransferase (adenine-specific) [EC:2.1.1.72]	251	PRINTS	PR00508	S21 class N4 adenine-specific DNA methyltransferase signature	189	207	2.70E-31	TRUE	IPR001091	Restriction/modification DNA-methylase	HGW54766.1	47.3	239	116	2	5	233	13	251	2.70E-57	232.6	252	265	N/A	N/A		HGW54766.1 hypothetical protein [Candidatus Margulisbacteria bacterium]
`Fenrir Meg22_1012`	Meg22_1012_scaffold_2kb_scaffold_226_62	(52671..53426)	-1	Lokiarchaeota	Lytic	K00571	E2.1.1.72; site-specific DNA-methyltransferase (adenine-specific) [EC:2.1.1.72]	251	PRINTS	PR00508	S21 class N4 adenine-specific DNA methyltransferase signature	189	207	2.70E-31	TRUE	IPR001091	Restriction/modification DNA-methylase	HHG53708.1	49	241	113	2	4	234	10	250	6.80E-61	244.6	252	258	N/A	N/A		HHG53708.1 hypothetical protein [Spirochaetes bacterium]
`Fenrir Meg22_1012`	Meg22_1012_scaffold_2kb_scaffold_226_62	(52671..53426)	-1	Lokiarchaeota	Lytic	K00571	E2.1.1.72; site-specific DNA-methyltransferase (adenine-specific) [EC:2.1.1.72]	251	PRINTS	PR00508	S21 class N4 adenine-specific DNA methyltransferase signature	212	232	2.70E-31	TRUE	IPR001091	Restriction/modification DNA-methylase	KAB2904251.1	34.7	245	143	4	8	236	10	253	1.50E-31	147.1	252	385	Chloroflexi	Anaerolineae bacterium	2052143	KAB2904251.1 site-specific DNA-methyltransferase [Anaerolineae bacterium]
[truncated: 5,212 more rows]

## Sheet: PhANNs classification
Proposed Name	Query_ID	Major capsid	Minor capsid	Baseplate	Major tail	Minor tail	Portal	Tail fiber	Tail shaft	Collar	Head-Tail Joining	Other	Confidence
Fenrir	Meg22_1012_scaffold_2kb_scaffold_226_1	0.09	0.53	0.13	0.16	0.13	6.26	0.27	0.09	0.35	0.21	1.77	0.97
[truncated: 826 more rows]

## Sheet: HHPred - PhANNs Major Capsid Pr
Gene	Match ID	Probability	E-Value
[truncated: 25 more rows]
